# Supplementary material
Source: Research Square preprint supplement (doi:10.21203/rs.3.rs-8757875/v1)
Supplement: Supplementary file 1 [file 12e04950bd106d399a054bcc.xlsx]

## Sheet: sheet1
ID	Metabolite	Formula	Retention time(min)	m/z(Apex)	m/z(Expected)	Fragmentation Score	Mode	Adducts	Mass Error (ppm)	Pubchem_ID	InChiKeys	SMILES	xlogp	classA	classB	classC	MS/MS spectrum	HQQR
6.25_418.1630n	syringaresinol	C22H26O8	6.24678	401.16	401.159	56.5	pos	M+H-H2O, M+H	0.439836	100067	KOWMJRJXZMEZLD-UHFFFAOYSA-N	COC1=CC(=CC(=C1O)OC)C2C3COC(C3CO2)C4=CC(=C(C(=C4)OC)O)OC	2.2	Lignans, neolignans and related compounds	Furanoid lignans		131.0493 292377.3223|330.1100 259538.8125|167.0704 224522.1133|70.0657 158584.5000|315.0867 156511.7344	1.14201e+06
8.49_207.1028m/z	Senkyunolide G	C12H16O3	8.48597	207.103	207.103	46.4	neg	M-H	0.791943	10013283	JGIFAEPLZJPSHA-UHFFFAOYSA-N	CCCCC1(C2=C(C=CCC2)C(=O)O1)O	1.9	Organoheterocyclic compounds	Isobenzofurans		163.1127 1255108.3828|207.1029 429621.7969|59.0138 345642.6089|66.0348 338069.3125|207.0660 163337.0313	193129
6.53_195.0665m/z	JP-2	C10H12O4	6.52622	195.067	195.066	66.7	neg	M-H	1.24956	100323	PCTPJULDTWCNKF-UHFFFAOYSA-N	CCOC(=O)CC1(C=CC(=O)C=C1)O	0.6	Organic oxygen compounds	Organooxygen compounds	Alcohols and polyols	135.0408 1278225.4063|111.0451 985995.9336|179.0308 599337.8750|110.0372 498960.9063|134.0370 446615.2500	43605
3.03_155.0352m/z	Opuntiol	C7H8O4	3.02585	155.035	155.035	62.2	neg	M-H	1.21695	10034839	LQJXQKKJSKMSHO-UHFFFAOYSA-N	COC1=CC(=O)OC(=C1)CO	-0.4	Organoheterocyclic compounds	Pyrans	Pyranones and derivatives	140.0114 6662444.4063|59.0138 625582.4883|155.0355 443043.2500|110.0237 389595.7227|114.0560 354089.0313	170226
13.09_317.2129m/z	12-HEPE	C20H30O3	13.0925	317.212	317.212	80.56	neg	[M-H]1-	2.1891	10041593	MCRJLMXYVFDXLS-QGQBRVLBSA-N	CCC=CCC=CCC(C=CC=CCC=CCCCC(=O)O)O	4.5	Lipids and lipid-like molecules	Fatty Acyls	Eicosanoids	317.2125 1084004.1211|287.2011 615627.7852|179.1078 77406.7900|61.9883 33824.5488|146.9643 17130.1465	393035
8.63_216.0790n	Nepodin	C13H12O3	8.6338	247.097	247.097	57.3	neg	M-H, M-H+CH3OH	1.82297	100780	DMLHPCALHMPJHS-UHFFFAOYSA-N	CC1=CC2=C(C(=CC=C2)O)C(=C1C(=O)C)O	3.1	Benzenoids	Naphthalenes	Naphthols and derivatives	200.0476 5109119.2188|215.0704 1494917.3516|159.9726 443564.1250|214.1532 118540.7031|172.0524 91467.1094	681391
5.74_187.0978m/z	Euscapholide	C8H12O3	5.7384	187.098	187.097	41.5	neg	M-H+CH3OH	4.62238	100956117	AOPJIQXDBLPZDD-NKWVEPMBSA-N	CC(CC1CC=CC(=O)O1)O	0.9	Organoheterocyclic compounds	Pyrans	Pyranones and derivatives	187.0978 653078.3555|125.0970 366777.8509|116.0505 225400.7552|142.0872 159156.3047|187.0394 134584.8730	311554
5.45_225.0766m/z	Massarilactone B	C11H14O5	5.45062	225.077	225.077	59.7	neg	M-H	-1.10014	10105097	DXUWKSUWEMSKDA-MHLXCEJISA-N	CC=CC1C(C(C2=C(O1)C(OC2=O)C)O)O	-0.5	Organoheterocyclic compounds	Dihydrofurans	Furanones	225.0752 476721.5313|137.0970 425548.5117|181.0491 419761.4336|166.0270 405909.8750|122.0374 239072.5645	33501.5
0.81_725.2434m/z	Antibiotic ES 242-3	C34H36O11	0.814067	725.243	725.245	60.4	neg	M+CH3COOH+HCOO	-2.6055	101085766	UIXDBHLNQHECCU-KCVUBSRHSA-N	CC1C(C2=C(C3=C(C(=CC(=C3)OC)OC)C(=C2CO1)O)C4=C5C(C(OCC5=C(C6=C4C=C(C=C6OC)OC)O)C)OC(=O)C)O	3.8	Lignans, neolignans and related compounds	Arylnaphthalene lignans		59.0138 283472.6563|71.0138 170536.3018|383.1200 155016.3027|101.0243 137520.1406|89.0245 111451.4609	277669
10.29_471.3473m/z	glycyrrhetic acid	C30H46O4	10.2941	471.347	471.347	74.5	pos	M+H	0.857454	10114	MPDGHEJMBKOTSU-YKLVYJNSSA-N	CC1(C2CCC3(C(C2(CCC1O)C)C(=O)C=C4C3(CCC5(C4CC(CC5)(C)C(=O)O)C)C)C)C	6.4	Lipids and lipid-like molecules	Prenol lipids	Triterpenoids	201.1639 456423.8203|205.1585 434696.6484|119.0857 279674.5820|187.1479 278184.9453|147.1169 268343.9609	1.27214e+06
6.11_271.1548m/z	Plucheoside B aglycone	C13H22O3	6.1112	271.155	271.155	54.3	neg	M+HCOO	-1.51839	101215660	HODWUFMHAGVDJY-QANURTJOSA-N	CC1=C(C(CC(C1O)O)(C)C)C=CC(C)O	0.5				271.1559 2231348.1250|109.0292 310423.3750|80.9652 236585.2031|87.0451 170539.2441|101.0608 145897.9688	439376
5.86_229.1082m/z	Taiwapyrone	C10H14O4	5.85528	229.108	229.108	41.7	neg	M-H+CH3OH	3.00708	101316864	KGBKYZFFQHZKLE-QMMMGPOBSA-N	CCCC(C1=C(OC(=O)C=C1)CO)O	-0.1	Organoheterocyclic compounds	Pyrans	Pyranones and derivatives	229.1044 426994.2188|185.1185 399724.3750|149.0608 291020.8848|88.0406 140552.5625|114.0922 113281.9297	322783
1.89_210.0409m/z	2-Formamidobenzoic acid	C8H7NO3	1.8905	210.041	210.041	36.8	neg	M+HCOO	0.38216	101399	LLLPDUXGHXIXIW-UHFFFAOYSA-N	C1=CC=C(C(=C1)C(=O)O)NC=O	1.9	Benzenoids	Benzene and substituted derivatives	Benzoic acids and derivatives	93.0346 3940788.1680|167.0350 3334698.0000|123.0452 1712526.3750|121.0293 1614871.2500|65.0397 1296686.5000	61300.8
8.30_237.1131m/z	trans-Norpterosin C	C13H16O3	8.29803	237.113	237.113	43.8	neg	M-H+H2O	2.04061	101417427	XGHDADRUKBUYPP-UFBFGSQYSA-N	CC1C(C2=C(C1=O)C(=C(C(=C2)C)CO)C)O	1	Benzenoids	Indanes	Indanones	193.0844 1078726.9688|237.0722 454883.9434|193.1220 442190.9219|237.1118 437613.9219|219.1026 330162.4063	60113.4
4.83_577.1379m/z	Vitexin-2''-O-p-trans-coumarate	C30H26O12	4.82588	577.138	577.135	55.3	neg	M-H	4.81274	101422334	FJGOEBQRHWKKJH-HORBVDEJSA-N	C1=CC(=CC=C1/C=C/C(=O)O[C@@H]2[C@H]([C@@H]([C@H](O[C@H]2C3=C(C=C(C4=C3OC(=CC4=O)C5=CC=C(C=C5)O)O)O)CO)O)O)O	2.5				125.0247 66983.3047|289.0718 51268.7930|407.0755 27343.2051|137.0246 18266.6563|161.0244 14117.7031	344063
10.88_324.1594m/z	Isocorydine	C20H23NO4	10.8784	324.159	324.159	74.8	pos	M+H-H2O	0.0729518	10143	QELDJEKNFOQJOY-ZDUSSCGKSA-N	CN1CCC2=CC(=C(C3=C2C1CC4=C3C(=C(C=C4)OC)O)OC)OC	2.6	Alkaloids and derivatives	Aporphines		279.1012 812057.8555|261.0907 279465.7715|233.0960 215143.4648|205.1009 123115.4395|307.1885 53514.0059	556149
6.35_504.2567n	Leeaoside	C24H40O11	6.34703	503.249	503.25	36.4	neg	M-H, M+Cl	-0.775698	101432441	WMOJOCZNFPTCBX-IGALCOENSA-N	CC1=CC(=O)CC(C1CCC(C)OC2C(C(C(C(O2)COC3C(C(C(O3)CO)O)O)O)O)O)(C)C	-1.2	Lipids and lipid-like molecules	Fatty Acyls	Fatty acyl glycosides	539.2241 332393.8086|61.9882 170118.6875|503.2470 163025.7480|59.0137 115299.3906|135.0450 110879.8633	855585
7.09_296.1647m/z	(-)-Nuciferine	C19H21NO2	7.08755	296.164	296.164	74.34	pos	[M+H]+	0.501658	10146	ORJVQPIHKOARKV-OAHLLOKOSA-N	CN1CCC2=CC(=C(C3=C2C1CC4=CC=CC=C43)OC)OC	3.4	Alkaloids and derivatives	Aporphines		251.0702 17263290.0000|223.0752 14153995.0000|279.0652 9822890.0000|233.0598 7094329.4688|205.0647 6667671.5000	100797
10.59_379.2499m/z	3-O-Acetylcalliterpenone	C22H34O4	10.5899	379.25	379.248	69.2	neg	M-H+H2O	4.01272	101596795	PTVDSZPMJVQUCE-IMILZGBUSA-N	CC(=O)OCC1(CC23CCC4C(C(=O)CCC4(C2CCC1C3)C)(C)C)O	3.6	Lipids and lipid-like molecules	Prenol lipids	Diterpenoids	136.0528 188738.8213|379.2437 141448.9531|193.1234 131637.9072|185.1186 95203.7510|96.9600 91769.6250	40900.5
6.84_717.1536m/z	Myricetin 3-O-beta-D-xylopyranosyl(1-2)-beta-D-glucopyranoside	C26H28O17	6.84047	717.154	717.152	49.4	neg	M+CH3COOH+HCOO	2.73804	101641678	MMKMIFKDPPAMLJ-JWYZLBFDSA-N	C1C(C(C(C(O1)OC2C(C(C(OC2OC3=C(OC4=CC(=CC(=C4C3=O)O)O)C5=CC(=C(C(=C5)O)O)O)CO)O)O)O)O)O	-1.5	Phenylpropanoids and polyketides	Flavonoids	Flavonoid glycosides	321.0406 29039365.6974|519.0927 10460056.5298|185.0245 7551596.8263|109.0294 7482077.8105|339.0515 6525170.6605	1.32608e+08
5.29_415.1040m/z	Toringin	C21H20O9	5.2918	415.104	415.103	46	neg	M-H	1.39552	101686456	IRHAYEHCEVRWSB-QNDFHXLGSA-N	C1=CC=C(C=C1)C2=CC(=O)C3=C(O2)C=C(C=C3OC4C(C(C(C(O4)CO)O)O)O)O	0.7	Phenylpropanoids and polyketides	Flavonoids	Flavonoid glycosides	191.1078 6593044.3750|59.0139 6226084.3672|139.0764 5702356.4688|71.0139 2706874.7500|267.0663 1841669.3906	151929
15.11_165.0195m/z	Phthalic acid	C8H6O4	15.1137	165.019	165.019	59.89	neg	[M-H]-	1.30148	1017	XNGIFLGASWRNHJ-UHFFFAOYSA-N	C1=CC=C(C(=C1)C(=O)O)C(=O)O	0.7	Benzenoids	Benzene and substituted derivatives	Benzoic acids and derivatives	164.8363 548446.9173|121.0294 372958.5537|165.0181 89732.1021|121.9227 59852.5688|61.9884 50864.1898	219211
11.14_413.1960m/z	Galgravin	C22H28O5	11.1421	413.196	413.194	55.3	pos	M+H2O+Na	5.44877	101749	JLJAVUZBHSLLJL-DQEHQXCCSA-N	CC1C(C(OC1C2=CC(=C(C=C2)OC)OC)C3=CC(=C(C=C3)OC)OC)C	4.4	Lignans, neolignans and related compounds	Furanoid lignans	Tetrahydrofuran lignans	191.1068 822621.2305|205.0860 273862.2793|91.0547 96116.2500|177.0910 95780.6641|207.1021 70466.9043	219591
8.44_627.2878m/z	Crotonionoside C	C24H42O12	8.43515	627.288	627.287	41	neg	M+CH3COOH+HCOO	1.5981	101784737	JRBOWEBYZVKAGB-GKVCMWFDSA-N	CC1CC(CC(C1(C=CC(C)O)O)(C)C)OC2C(C(C(C(O2)CO)O)O)OC3C(C(CO3)(CO)O)O	-1.5	Lipids and lipid-like molecules	Prenol lipids	Terpene glycosides	627.2872 235841.8359|180.0662 156906.9814|129.1034 127475.1812|293.1503 99211.3291|155.0826 98974.8281	314517
8.87_487.3422m/z	Quillaic acid	C30H46O5	8.87263	487.342	487.342	90	pos	M+H	0.845596	101810	MQUFAARYGOUYEV-UAWZMHPWSA-N	CC1(CCC2(C(C1)C3=CCC4C5(CCC(C(C5CCC4(C3(CC2O)C)C)(C)C=O)O)C)C(=O)O)C	6.1	Lipids and lipid-like molecules	Prenol lipids	Triterpenoids	487.3512 143438.5313|119.0855 135742.1411|107.0857 129543.5313|451.3257 111983.7051|95.0860 108043.0625	310091
6.79_163.0766m/z	2,4,6-Trimethylbenzoic acid	C10H12O2	6.79183	163.077	163.076	73.78	neg	[M-H]-	5.35379	10194	FFFIRKXTFQCCKJ-UHFFFAOYSA-N	CC1=CC(=C(C(=C1)C)C(=O)O)C	2.6	Benzenoids	Benzene and substituted derivatives	Benzoic acids and derivatives	149.0116 12774158.0000|119.0502 2032035.2813|148.0524 1232637.5000|147.0450 1002922.8750|121.0164 691395.5000	44416.1
6.98_183.1028m/z	Tetrahydrolachnophyllum lactone	C10H14O2	6.98072	183.103	183.102	43.9	neg	M-H+H2O	4.36962	102004555	LNUHHJBOQMXWQP-UHFFFAOYSA-N	CCCC#CCC1CCC(=O)O1	2.3	Organoheterocyclic compounds	Lactones	Gamma butyrolactones	183.1015 774823.7656|139.1110 314093.5618|57.0346 151297.5688|69.0347 146969.2822|141.0927 137921.8574	1.3354e+06
9.98_233.1548m/z	Orobanone	C15H20O	9.97722	233.155	233.154	47.1	neg	M-H+H2O	3.10051	102004705	UGZCHVLYDNLQTR-UHFFFAOYSA-N	CC1CCC2=C1C=C(C(=O)C=C2C)C(C)C	2.9	Hydrocarbon derivatives	Tropones		233.1569 572225.2695|59.0138 336779.8096|215.1442 199442.9531|127.1128 141168.7988|173.0460 71595.0547	192618
7.15_633.2029m/z	Bisisorhapontigenin A	C31H28O8	7.15365	633.203	633.197	47.2	neg	M+CH3COOH+HCOO	9.73556	102004716	YPINWBUQDZTXDV-XKLXBFOWSA-N	COC1=CC(=C2C(C(OC2=C1)C3=CC(=C(C=C3)O)OC)C4=CC(=CC(=C4)O)O)C=CC5=CC(=C(C=C5)O)OC	5.7	Phenylpropanoids and polyketides	2-arylbenzofuran flavonoids		135.0450 1049225.1367|373.0941 139698.4736|179.0350 110202.8516|134.0373 62911.4297|61.9882 57223.2852	159789
1.52_315.0722m/z	Phellolactone	C13H14O8	1.52097	315.072	315.072	36.9	neg	M-H+H2O	2.11012	102004720	XDFVRGIAOTYYJE-GXFFZTMASA-N	COC1=C(C=CC(=C1)C(=O)OCC2(COC(=O)C2O)O)O	-0.4	Benzenoids	Benzene and substituted derivatives	Benzoic acids and derivatives	315.0705 4982433.0469|108.0214 3418555.1250|152.0112 2824888.7813|153.0189 2713543.3379|109.0291 2324357.3779	7.73525e+06
6.93_373.1301m/z	15,16-Dihydrotanshindiol C	C18H18O5	6.93263	373.13	373.129	69.5	neg	M+CH3COO	2.7529	102004772	HSWJBFKCVPRBJO-GNGYTGERSA-N	CC1COC2=C1C(=O)C(=O)C3=C2C=CC4=C3CCC(C4(C)O)O	0.7	Lipids and lipid-like molecules	Prenol lipids	Diterpenoids	373.1287 365189.0938|313.1093 293465.2617|343.1212 167754.9023|108.0217 152375.4375|150.0305 134872.8672	161238
5.69_275.1034m/z	Cyclo(Tyr-Hpro)	C14H16N2O4	5.6913	275.103	275.104	63.8	neg	M-H	-1.096	102004913	JEKJKMJDASOZRW-UHFFFAOYSA-N	C1C(CN2C1C(=O)NC(C2=O)CC3=CC=C(C=C3)O)O	0.1	Organic acids and derivatives	Carboxylic acids and derivatives	Amino acids, peptides, and analogues	275.1042 12172935.8750|127.0510 11142645.7500|109.0404 3984074.7813|93.0344 831855.5625|147.0448 753885.3750	1.14598e+06
9.68_331.1555m/z	Lettowienolide	C18H22O3	9.67818	331.155	331.155	45	neg	M+HCOO	1.40355	102025309	BQSTWVNVLQVIEE-NTUHNPAUSA-N	CC(=CCCC(=CCC1=CC(=CC2=C1OC(=O)C2)O)C)C	4.8	Lipids and lipid-like molecules	Prenol lipids	Terpene lactones	257.1543 440969.7422|287.1537 246295.7188|123.0452 182747.0625|269.1516 135470.0371|135.0454 132196.1406	154966
8.54_305.1759m/z	De-O-methylprosolanapyrone I	C17H22O3	8.54048	305.176	305.175	59.4	neg	M-H+CH3OH	2.14471	102077066	WFNXTYLZRVHCCW-JHHIBIJLSA-N	CC=CC=CCCCCC=CC1=CC(=C(C(=O)O1)C)O	4.5	Organoheterocyclic compounds	Pyrans	Pyranones and derivatives	305.1790 1011540.0469|114.0560 68166.7378|135.0815 66406.9995|61.9883 58950.7969|119.0504 40494.9219	67406.8
6.85_338.1387m/z	Dihydroberberine	C20H19NO4	6.84823	338.139	338.139	51.9	pos	M+H	0.107629	10217	FZAGOOYMTPGPGF-UHFFFAOYSA-N	COC1=C(C2=C(C=C1)C=C3C4=CC5=C(C=C4CCN3C2)OCO5)OC	3.5	Alkaloids and derivatives	Protoberberine alkaloids and derivatives		338.1379 17377522.1667|105.0336 8218154.7227|323.1141 5830903.9583|322.1070 5048456.6250|294.1120 4172424.8542	1.14919e+07
1.44_282.1198m/z	N6-Methyladenosine	C11H15N5O4	1.43958	282.12	282.122	77.86	pos	[M+H]+	-9.25804	102175	VQAYFKKCNSOZKM-IOSLPCCCSA-N	CNC1=C2C(=NC=N1)N(C=N2)C3C(C(C(O3)CO)O)O	-0.4	Nucleosides, nucleotides, and analogues	Purine nucleosides		70.0657 3918236.9141|265.1289 2265383.5000|282.1243 1949869.3750|136.0612 1875821.6250|134.0964 1274609.5000	640575
7.72_312.1360n	1,7-Bis(4-hydroxyphenyl)-5-hydroxyhept-1-en-3-one	C19H20O4	7.72188	311.129	311.129	41.6	neg	M-H, M+Cl	-0.444128	102176225	CWFOAVBXINFPCW-VZUCSPMQSA-N	C1=CC(=CC=C1CCC(CC(=O)C=CC2=CC=C(C=C2)O)O)O	3	Phenylpropanoids and polyketides	Diarylheptanoids	Linear diarylheptanoids	161.0606 1434403.3359|311.1282 884622.4375|285.1470 872914.7031|255.1380 729135.0703|119.0500 354815.8984	5.0037e+06
10.98_245.1173m/z	Osthole	C15H16O3	10.9841	245.117	245.117	84.1	pos	M+H	0.196038	10228	MBRLOUHOWLUMFF-UHFFFAOYSA-N	CC(=CCC1=C(C=CC2=C1OC(=O)C=C2)OC)C	3.8	Phenylpropanoids and polyketides	Coumarins and derivatives		189.0544 1176675.1797|131.0491 591701.3496|245.1184 193049.4375|95.0855 68249.3281|103.0547 64750.9180	51087.4
6.27_547.1446m/z	6''-O-Acetylglycitin	C24H24O11	6.26833	547.145	547.146	93.8	neg	M+CH3COO	-2.23108	10228095	DUBPGEJGGVZKDD-PFKOEMKTSA-N	CC(=O)OC[C@@H]1[C@H]([C@@H]([C@H]([C@@H](O1)OC2=C(C=C3C(=C2)OC=C(C3=O)C4=CC=C(C=C4)O)OC)O)O)O	0.7				547.1406 1209980.7031|353.0663 542258.4766|383.0777 417522.1445|297.0761 271543.7500|325.0715 145165.2520	421435
7.31_353.1858m/z	Dihydropalmatine	C21H23NO4	7.30917	353.186	353.187	41.9	pos	M+NH4-H2O	-2.14652	1023495	PTPHDVKWAYIFRX-UHFFFAOYSA-N	COC1=C(C2=C(C=C1)C=C3C4=CC(=C(C=C4CCN3C2)OC)OC)OC	3.7	Alkaloids and derivatives	Protoberberine alkaloids and derivatives		144.0809 5170314.0130|353.1784 4320014.0000|352.1544 3542826.6667|353.1862 2920606.3333|131.0493 2298531.3460	1.73653e+07
8.10_429.1199m/z	1''-Hydroxyerythrinin C	C20H18O7	8.09678	429.12	429.119	71.9	neg	M+CH3COO	2.29057	102366570	DMNFLFWDOVOSQV-OALUTQOASA-N	CC(C)([C@@H]1[C@H](C2=C(O1)C=C3C(=C2O)C(=O)C(=CO3)C4=CC=C(C=C4)O)O)O	2.5				310.0476 665250.3438|325.0718 532065.7422|429.1121 514066.5156|309.0401 240791.4219|297.0393 156928.4766	349689
6.21_502.1014m/z	Luteolin-3-O-beta-D-glucuronide	C21H18O12	6.20665	502.101	502.098	51.9	neg	M-H+CH3CN	6.16642	10253785	JDOFZOKGCYYUER-ZFORQUDYSA-N	C1=CC(=C(C=C1C2=CC(=O)C3=C(C=C(C=C3O2)O)O)OC4C(C(C(C(O4)C(=O)O)O)O)O)O	0.8	Phenylpropanoids and polyketides	Flavonoids	Flavonoid glycosides	175.0402 447394.7148|135.0451 391966.6250|191.0565 356001.3789|197.0454 273987.9277|72.9931 198975.3281	111731
3.98_258.0982m/z	Kainic acid	C10H15NO4	3.9827	258.098	258.098	35.6	neg	M+HCOO	-0.662403	10255	VLSMHEGGTFMBBZ-OOZYFLPDSA-N	CC(=C)C1CNC(C1CC(=O)O)C(=O)O	-1.8	Organic acids and derivatives	Carboxylic acids and derivatives	Amino acids, peptides, and analogues	258.0980 603569.1250|128.0352 301043.2188|130.0872 257919.6211|129.0189 106029.4199|114.0559 104956.0781	323831
5.86_211.1442m/z	Cyclo(leucylprolyl)	C11H18N2O2	5.85932	211.144	211.145	62.65	pos	[M+H]+	-2.64522	102892	SZJNCZMRZAUNQT-UHFFFAOYSA-N	CC(C)CC1C(=O)N2CCCC2C(=O)N1	1.1	Organic acids and derivatives	Carboxylic acids and derivatives	Amino acids, peptides, and analogues	211.1441 2744932.0391|86.0969 1818483.8750|131.0491 1249729.1563|70.0657 1220758.9570|136.0753 999735.3125	1.34699e+06
1.62_145.0507m/z	Conduritol A	C6H10O4	1.6239	145.051	145.051	40	neg	M-H	0.730888	10290861	LRUBQXAKGXQBHA-GUCUJZIJSA-N	C1=CC(C(C(C1O)O)O)O	-2.1	Organic oxygen compounds	Organooxygen compounds	Alcohols and polyols	145.0504 1172234.1289|57.0354 676802.7914|101.0608 523154.1500|59.0143 468662.2500|127.0400 446130.7266	3.19461e+06
7.20_624.1751n	7-O-Methylrutin	C28H32O16	7.20428	623.168	623.162	68	neg	M-H, M+Cl	9.64801	10326596	LVRWOUXRNRBDNV-GEBJFKNCSA-N	CC1C(C(C(C(O1)OCC2C(C(C(C(O2)OC3=C(OC4=CC(=CC(=C4C3=O)O)OC)C5=CC(=C(C=C5)O)O)O)O)O)O)O)O	-1	Phenylpropanoids and polyketides	Flavonoids	Flavonoid glycosides	313.0356 644497.6309|328.0592 628123.4893|623.1670 276419.0586|285.0399 89453.2451|61.9884 86260.5391	2.26664e+06
6.99_287.0561m/z	Furomollugin	C14H10O4	6.99427	287.056	287.056	57.5	neg	M+HCOO	-0.154366	10354359	AFMYCYWCHKTNNE-UHFFFAOYSA-N	COC(=O)C1=C(C2=CC=CC=C2C3=C1C=CO3)O	3.6	Organoheterocyclic compounds	Naphthofurans		287.0548 1775286.9219|272.0309 972615.2969|244.0363 204601.5938|125.0243 182013.2031|255.0288 170271.1563	114819
6.16_195.0664m/z	Paeonilactone B	C10H12O4	6.16403	195.066	195.066	73	neg	M-H	0.562206	10375422	GFSTVWDPRTWASK-XSSZXYGBSA-N	CC1(CC2C(CC1=O)C(=C)C(=O)O2)O	0.1	Organoheterocyclic compounds	Benzofurans		136.0529 4152873.6758|195.0663 3245782.6094|135.0450 2414878.7109|72.9930 1980436.3750|123.0454 1532421.0820	550803
7.46_199.0978m/z	Gelsemiol	C10H16O4	7.46208	199.098	199.098	75.1	neg	M-H	1.06175	10375526	FNYPTQQTJGQJNF-BGKGJTHRSA-N	CC1CC2C(C1CO)C(C(=O)O2)CO	0.5	Lipids and lipid-like molecules	Prenol lipids	Terpene lactones	155.1076 1944955.1563|199.0959 1331975.8750|137.0970 388838.6680|181.0879 142623.5781|69.0346 78785.3203	205567
7.87_180.1151n	Olivetol	C11H16O2	7.86798	225.113	225.113	37.4	neg	M-H+CH3OH, M+HCOO	0.224219	10377	IRMPFYJSHJGOPE-UHFFFAOYSA-N	CCCCCC1=CC(=CC(=C1)O)O	3.6	Benzenoids	Phenols	Benzenediols	225.1117 1827288.7456|181.1230 941788.0581|207.1031 677238.3445|163.1126 267646.7267|59.0138 137077.9004	2.62855e+06
7.64_371.0780m/z	Demethoxykanugin	C18H14O6	7.63593	371.078	371.077	35.6	neg	M+HCOO	2.45146	10381709	UBKPBGYXBIXFFC-UHFFFAOYSA-N	COC1=CC2=C(C=C1)C(=O)C(=C(O2)C3=CC4=C(C=C3)OCO4)OC	3.1	Phenylpropanoids and polyketides	Flavonoids	O-methylated flavonoids	175.0399 9739149.0000|157.0294 1339277.5000|283.1399 1230421.9141|129.0345 1229826.3750|158.0365 774087.9375	3.93476e+06
1.74_359.0989m/z	Glucosyringic acid	C15H20O10	1.7429	359.099	359.098	36.4	neg	M-H	1.60364	10383888	BLKMDORKRDACEI-OVKLUEDNSA-N	COC1=CC(=CC(=C1OC2C(C(C(C(O2)CO)O)O)O)OC)C(=O)O	-1	Phenylpropanoids and polyketides	Tannins	Hydrolyzable tannins	153.0191 3754672.8906|125.0242 1384201.2031|135.0450 750149.2813|151.0035 605296.5039|179.0348 587281.3652	290125
4.77_419.0989m/z	3-O-Acetylpadmatin	C18H16O8	4.77263	419.099	419.098	57.6	neg	M+CH3COO	1.52704	10406203	WWYQJKVSCKMFCP-MSOLQXFVSA-N	CC(=O)OC1C(OC2=CC(=CC(=C2C1=O)O)OC)C3=CC(=C(C=C3)O)O	2.4	Phenylpropanoids and polyketides	Flavonoids	O-methylated flavonoids	419.0913 424415.3203|401.0883 282915.8125|123.0452 274406.5449|109.0292 155855.2656|59.0138 120890.0078	311087
1.89_488.1775m/z	Orcinol gentiobioside	C19H28O12	1.8905	488.178	488.177	79.1	neg	M-H+CH3CN	1.72112	10411370	XZPNBJLXZMBECP-SKYGPZSASA-N	CC1=CC(=CC(=C1)OC2C(C(C(C(O2)COC3C(C(C(C(O3)CO)O)O)O)O)O)O)O	-2.4	Organic oxygen compounds	Organooxygen compounds	Carbohydrates and carbohydrate conjugates	164.0717 2034155.0703|147.0451 528511.3516|101.0245 390683.6377|61.9884 268523.6875|236.0929 251775.7285	486178
5.01_527.1613m/z	Kinsenoside	C10H16O8	5.01453	527.161	527.162	68.1	neg	2M-H	-0.913193	10422896	MQEPWBMWFIVRPS-ZGSHZZHUSA-N	C1[C@H](COC1=O)O[C@H]2[C@@H]([C@H]([C@@H]([C@H](O2)CO)O)O)O	-2.4	Organic oxygen compounds	Organooxygen compounds	Carbohydrates and carbohydrate conjugates	59.0138 1933390.9395|383.1196 674602.3047|425.1310 360252.9336|341.1098 163432.9473|101.0245 157789.1250	511620
10.17_293.2121m/z	9-HOTrE	C18H30O3	10.1676	293.212	293.212	82.36	neg	[M-H]1-	1.64735	10447175	RIGGEAZDTKMXSI-CUHSZNQNSA-N	CCC=CCC=CC=CC(CCCCCCCC(=O)O)O	4.7	Lipids and lipid-like molecules	Fatty Acyls	Lineolic acids and derivatives	293.2159 974882.7383|113.0972 79354.3604|292.1964 75464.1689|275.2066 44340.4385|293.0300 36675.6602	251318
5.47_475.1825m/z	Kanokoside A	C21H32O12	5.46575	475.182	475.182	39.5	neg	M-H	0.739557	10457683	CHSDMOZSQFIUGK-MZHNZBIYSA-N	CC(C)CC(=O)OC1C2C(C3C(C2(CO)O)O3)C(=CO1)COC4C(C(C(C(O4)CO)O)O)O	-2.7	Organic oxygen compounds	Organooxygen compounds	Carbohydrates and carbohydrate conjugates	415.1614 1392549.7344|59.0138 851655.0693|269.1028 708799.8242|311.0558 605979.6523|101.0244 508141.4688	815242
5.55_263.0560m/z	Euparone	C12H10O4	5.54922	263.056	263.056	62.1	neg	M+HCOO	-0.573334	104654	FOXRXAILTBHLQA-UHFFFAOYSA-N	CC(=O)C1=CC2=CC(=C(C=C2O1)O)C(=O)C	2.2	Organoheterocyclic compounds	Benzofurans		263.0561 860674.1563|233.0455 761642.1406|191.0350 342472.7402|135.0451 315501.5254|109.0298 224053.2178	101383
5.26_273.0976m/z	Loganetin	C11H16O5	5.26452	273.098	273.098	49.6	neg	M+HCOO	-1.81792	10466307	XWOHZIIPBYAMJX-KHBMLBSESA-N	CC1C(CC2C1C(OC=C2C(=O)OC)O)O	0.2	Lipids and lipid-like molecules	Prenol lipids	Monoterpenoids	229.0986 3141999.0938|92.0506 1528605.0977|185.1086 1411073.6563|273.0885 1188977.6875|116.0507 860988.7344	219130
10.13_283.1915m/z	Oplopanone	C15H26O2	10.1274	283.191	283.191	36	neg	M+HCOO	-0.0208655	10466745	WLXJHVQYKOJBBN-NJVJYBDUSA-N	CC(C)C1CCC(C2C1C(CC2)C(=O)C)(C)O	2.6	Lipids and lipid-like molecules	Prenol lipids	Sesquiterpenoids	283.1871 654579.3047|241.1810 480790.2734|211.1341 303761.3652|268.0370 225521.6992|167.1439 132473.2266	90691.3
5.31_349.1300m/z	Paeonilactone C	C17H18O6	5.31497	349.13	349.129	56.7	neg	M-H+CH3OH	4.09694	10471123	BDKBBWGLLDEQEV-ZFRZLUBXSA-N	CC1(CC2C(CC1=O)C(C(=O)O2)COC(=O)C3=CC=CC=C3)O	1.2	Benzenoids	Benzene and substituted derivatives	Benzoic acids and derivatives	301.1083 776170.5703|271.0607 579965.9766|59.0138 394648.9307|195.0662 334689.3945|286.0845 306916.2734	74163.3
11.92_469.3333m/z	Camaldulenic acid	C30H46O4	11.9202	469.333	469.332	85.2	neg	M-H	2.04379	10528366	YOLIZCATBHWOBV-JZQYXDLISA-N	CC1(CCC2(CCC3(C(=C2C1)C=CC4C3(CCC5C4(CC(C(C5(C)C)O)O)C)C)C)C(=O)O)C	6	Lipids and lipid-like molecules	Prenol lipids	Triterpenoids	469.3330 506474.7799|423.3211 157417.6208|425.3460 59955.0247|61.9883 42244.7734|409.3122 24875.7915	668454
1.32_325.1077m/z	Glabrocoumarone A	C19H16O4	1.32392	325.108	325.108	42	neg	M-H+H2O	0.604671	10542808	SJIZTMNAKZAOTA-UHFFFAOYSA-N	CC1(C=CC2=C(C=CC(=C2O1)C3=CC4=C(O3)C=C(C=C4)O)O)C	4.2	Phenylpropanoids and polyketides	2-arylbenzofuran flavonoids		325.1081 8246820.8750|124.0074 2797460.5195|195.0447 1483416.3281|223.0394 1051089.0586|106.9809 514613.3438	392762
5.17_478.1694n	Kelampayoside A	C20H30O13	5.17487	477.162	477.161	64.3	neg	M-H, M+CH3COO	1.5728	10552637	CKGKQISENBKOCA-FHXQZXMCSA-N	COC1=CC(=CC(=C1OC)OC)OC2C(C(C(C(O2)COC3C(C(CO3)(CO)O)O)O)O)O	-2.1	Organic oxygen compounds	Organooxygen compounds	Carbohydrates and carbohydrate conjugates	59.0137 1542339.8477|71.0137 970643.0762|89.0243 757465.8965|293.0871 726623.9922|125.0244 675561.5293	898470
2.26_125.0245m/z	Pyrogallol	C6H6O3	2.25885	125.024	125.024	71.1	neg	M-H	0.292648	1057	WQGWDDDVZFFDIG-UHFFFAOYSA-N	C1=CC(=C(C(=C1)O)O)O	0.5	Benzenoids	Phenols	Benzenetriols and derivatives	125.0221 7150049.9076|81.0346 405282.9909|97.0295 376029.1992|69.0345 309192.8841|79.0189 265566.3880	738172
1.72_222.0772m/z	3,4-Dihydro-6,7-(methylenedioxy)-2(1H)-quinolinone	C10H9NO3	1.71848	222.077	222.077	44.3	neg	M-H+CH3OH	2.84039	10583861	DVTJKOLIEHUCKB-UHFFFAOYSA-N	C1CC(=O)NC2=CC3=C(C=C21)OCO3	0.9	Organoheterocyclic compounds	Quinolines and derivatives	Quinolones and derivatives	59.0137 2088478.6738|222.0771 1514376.5508|160.0426 1369120.3364|74.0246 1015030.1724|147.0449 803624.6216	1.47999e+06
6.66_593.1871m/z	Hesperidin	C28H34O15	6.66177	593.187	593.187	42.7	pos	M+H-H2O	1.05411	10621	QUQPHWDTPGMPEX-QJBIFVCTSA-N	CC1C(C(C(C(O1)OCC2C(C(C(C(O2)OC3=CC(=C4C(=O)CC(OC4=C3)C5=CC(=C(C=C5)OC)O)O)O)O)O)O)O)O	-1.1	Phenylpropanoids and polyketides	Flavonoids	Flavonoid glycosides	431.1326 239399.1719|313.0717 221720.0781|413.1258 189467.5156|395.1092 160078.8906|351.0860 128158.2813	3.598e+06
10.30_487.3433m/z	Coronalolic acid	C30H46O4	10.301	487.343	487.342	82.4	neg	M-H+H2O	2.11518	10648063	IOFXIXOKOAYADV-ICQJXUMVSA-N	CC(CCC=C(C)C=O)C1CCC2(C1(CCC34C2CCC(C3(C4)CCC(=O)O)C(=C)CO)C)C	7.2	Lipids and lipid-like molecules	Prenol lipids	Triterpenoids	487.3415 4840083.7500|469.3333 234673.1328|425.3418 152696.5430|423.3244 106794.4238|407.3337 94804.3730	3.29263e+06
7.04_187.0390m/z	Isopsoralen	C11H6O3	7.04397	187.039	187.039	56.1	pos	M+H	0.372097	10658	XDROKJSWHURZGO-UHFFFAOYSA-N	C1=CC2=C(C=CO2)C3=C1C=CC(=O)O3	2	Phenylpropanoids and polyketides	Coumarins and derivatives	Furanocoumarins	187.0393 2067234.3984|131.0492 1107784.7500|159.0442 950110.6523|103.0545 425476.9395|145.1012 288188.9082	36254.1
11.63_229.1235m/z	Chamazulene	C14H16	11.634	229.124	229.123	43.7	neg	M+HCOO	0.68441	10719	GXGJIOMUZAGVEH-UHFFFAOYSA-N	CCC1=CC2=C(C=CC2=C(C=C1)C)C	4.4	Lipids and lipid-like molecules	Prenol lipids	Sesquiterpenoids	229.1232 1376744.5625|185.1333 680952.6328|183.1751 69328.5078|125.8733 40828.9141|228.1013 21047.8711	144470
5.54_197.0458m/z	Syringic acid	C9H10O5	5.53612	197.046	197.046	92.6	neg	M-H	1.06089	10742	JMSVCTWVEWCHDZ-UHFFFAOYSA-N	COC1=CC(=CC(=C1O)OC)C(=O)O	1	Benzenoids	Benzene and substituted derivatives	Benzoic acids and derivatives	182.0218 4316602.3581|123.0086 2139507.7969|197.0452 1999567.4961|166.9985 1771776.0609|121.0292 1168096.6094	1.77636e+06
4.75_649.2030m/z	Macrophylloside D	C25H34O14	4.74668	649.203	649.198	78.3	neg	M+HCOOH+HCOO	8.05621	10745406	BKABLXWGRDWHDB-GWOWOUNZSA-N	CC1(C=CC2=CC(=C(C=C2O1)OC)C(=O)OC3C(C(C(C(O3)COC4C(C(C(C(O4)CO)O)O)O)O)O)O)C	-1.6	Organoheterocyclic compounds	Benzopyrans	1-benzopyrans	181.0505 1425303.2188|135.0449 485101.0469|137.0607 474079.2598|475.1458 335299.4063|649.2025 319369.1289	240625
4.87_195.0655m/z	7-Methoxycoumarin	C10H8O3	4.86517	195.065	195.066	54.3	pos	M+H2O+H	-1.64835	10748	LIIALPBMIOVAHH-UHFFFAOYSA-N	COC1=CC2=C(C=C1)C=CC(=O)O2	1.9	Phenylpropanoids and polyketides	Coumarins and derivatives		177.0546 1636838.7656|131.0492 1116946.9688|81.0340 1048141.8086|145.0284 969930.6719|105.0703 901447.9688	144944
0.78_135.0299m/z	L-Lactic acid	C3H6O3	0.776933	135.03	135.03	60.4	neg	M+HCOO	-0.11761	107689	JVTAAEKCZFNVCJ-REOHCLBHSA-N	CC(C(=O)O)O	-0.7	Organic acids and derivatives	Hydroxy acids and derivatives	Alpha hydroxy acids and derivatives	75.0086 10179530.6250|135.0298 6172344.4063|116.0069 3423389.3750|71.0135 1826693.9375|59.0137 1441244.1250	1.23097e+06
6.79_164.0355m/z	Coixol	C8H7NO3	6.79183	164.035	164.035	86.2	neg	M-H	1.09599	10772	MKMCJLMBVKHUMS-UHFFFAOYSA-N	COC1=CC2=C(C=C1)NC(=O)O2	1.1	Organoheterocyclic compounds	Benzoxazoles	Benzoxazolones	149.0118 15158865.1250|164.0356 1451417.2500|119.0502 1288791.4688|150.0322 1079046.5000|148.0524 861243.0000	259216
6.28_295.0825m/z	4-(cis)-Acetyl-3,6,8-trihydroxy-3-methyldihydronaphthalenone	C13H14O5	6.28238	295.083	295.082	39.6	neg	M+HCOO	0.72753	10777052	QDNOAZOXGLUUEB-OLZOCXBDSA-N	CC(=O)C1C2=C(C(=O)CC1(C)O)C(=CC(=C2)O)O	1	Benzenoids	Tetralins		295.0634 1179429.0000|109.0295 683025.8633|277.0709 571367.7031|262.0480 482099.6875|280.0583 255793.9219	140891
4.51_601.2159m/z	Lucidumoside C	C27H36O14	4.5132	601.216	601.213	47.1	neg	M-H+H2O	4.64175	10793430	RDLNVCALMXCDOJ-QUVQPCEGSA-N	CCOC(COC(=O)CC1C(=COC(C1=CC)OC2C(C(C(C(O2)CO)O)O)O)C(=O)OC)C3=CC(=C(C=C3)O)O	-0.7	Lipids and lipid-like molecules	Prenol lipids	Terpene glycosides	195.0658 22728.3457|135.0453 21883.1230|165.0535 11705.5508|439.1533 11171.6504|150.0290 10071.0010	159234
5.68_417.1181m/z	Daidzin	C21H20O9	5.67913	417.118	417.118	52.4	pos	M+H	0.269863	107971	KYQZWONCHDNPDP-QNDFHXLGSA-N	C1=CC(=CC=C1C2=COC3=C(C2=O)C=CC(=C3)OC4C(C(C(C(O4)CO)O)O)O)O	0.7	Phenylpropanoids and polyketides	Isoflavonoids	Isoflavonoid O-glycosides	86.0969 1357893.8750|255.0652 1058149.6094|131.0492 553614.5625|70.0657 503741.3125|72.0814 480594.8223	381846
1.37_257.0667m/z	Clauszoline M	C13H8NO3	1.3682	257.067	257.069	36.5	neg	M-H+CH3OH	-9.3014	10823162	IGPNSSMZXGKMGU-UHFFFAOYSA-N	C1=CC2=C(C(=C1)O)NC3=C2C=C(C(=C3)O)C=O	2.7	Organoheterocyclic compounds	Indoles and derivatives	Carbazoles	197.0455 427254.5000|257.0723 329604.2500|194.0464 172273.2910|117.0192 166012.5830|110.0246 162225.6377	47232.6
5.12_577.1797m/z	6'-O-beta-D-Glucosylgentiopicroside	C22H30O14	5.11585	577.18	577.177	70.9	neg	M+CH3COO	4.54482	10864232	BERNCPGDRADLCG-KEXDUYRESA-N	C=CC1C(OC=C2C1=CCOC2=O)OC3C(C(C(C(O3)COC4C(C(C(C(O4)CO)O)O)O)O)O)O	-3.4	Organic oxygen compounds	Organooxygen compounds	Carbohydrates and carbohydrate conjugates	139.0383 19155.0059|125.0222 11967.0840|433.1285 9299.8115|71.0131 8900.8477|59.0134 6525.1123	138734
8.96_285.2071m/z	Pterodondiol	C15H28O2	8.96098	285.207	285.207	63.6	neg	M+HCOO	-0.273083	10879263	LKKDASYGWYYFIK-DHMWGJHJSA-N	CC12CCCC(C1CC(CC2)C(C)(C)O)(C)O	3	Lipids and lipid-like molecules	Prenol lipids	Sesquiterpenoids	285.2064 31684358.0000|155.1440 583952.4375|139.1125 386823.0000|267.1959 353149.7031|141.1281 328286.4688	2.10524e+06
8.51_169.0871m/z	Isoboonein	C9H14O3	8.5129	169.087	169.087	65.8	neg	M-H	0.579966	10899112	DPDXVBIWZBJGSX-XUTVFYLZSA-N	CC1C(CC2C1COC(=O)C2)O	0.6	Lipids and lipid-like molecules	Prenol lipids	Terpene lactones	125.0970 11774773.8477|71.0501 2306822.2266|169.0868 1934704.4097|123.0814 851926.8906|83.0500 585526.5332	2.22896e+06
0.89_162.1125m/z	L-Carnitine	C7H15NO3	0.885483	162.113	162.112	38.2	pos	M+H	0.2249	10917	PHIQHXFUZVPYII-ZCFIWIBFSA-N	C[N+](C)(C)CC(CC(=O)[O-])O	-0.2	Organic nitrogen compounds	Organonitrogen compounds	Quaternary ammonium salts	162.1128 6352761.0938|103.0393 2332334.3203|162.0771 1710063.1016|72.0450 1679750.0000|85.0289 1583954.6758	1.50851e+06
7.08_237.0765m/z	(+)-Mellein	C10H10O3	7.07648	237.077	237.077	71.7	neg	M+CH3COO	-1.41597	10921069	KWILGNNWGSNMPA-LURJTMIESA-N	CC1CC2=C(C(=CC=C2)O)C(=O)O1	2.4	Organoheterocyclic compounds	Benzopyrans	2-benzopyrans	193.0866 147724447.0938|237.0746 51271706.5781|108.0215 45587386.8750|109.0292 13857559.8542|136.0163 13220250.5000	3.63844e+07
7.54_253.1798m/z	Artemisinic acid	C15H22O2	7.54115	253.18	253.18	78.6	pos	M+H2O+H	-2.33786	10922465	PLQMEXSCSAIXGB-SAXRGWBVSA-N	CC1CCC(C2C1CCC(=C2)C)C(=C)C(=O)O	3.8	Lipids and lipid-like molecules	Prenol lipids	Sesquiterpenoids	235.1722 1053801.4141|95.0860 693378.4619|133.1013 567275.0781|83.0496 531181.3242|121.1013 499886.9668	1.41979e+06
2.00_359.0988m/z	Phyllanthurinolactone	C14H18O8	2.00208	359.099	359.098	45.3	neg	M+HCOO	1.47333	10957981	NTDAFPROCLCPBL-ALLBUJQBSA-N	C1C(C=CC2=CC(=O)OC21)OC3C(C(C(C(O3)CO)O)O)O	-1.7	Organic oxygen compounds	Organooxygen compounds	Carbohydrates and carbohydrate conjugates	197.0455 1693130.3970|359.0966 1639165.2656|72.9931 1112477.9453|179.0343 889254.4136|135.0451 787950.4780	2.77285e+06
0.85_90.0317n	D-Ribose	C5H10O5	0.84635	149.046	149.045	75.48	neg	[M-H]-	0.145387	10975657	SRBFZHDQGSBBOR-SOOFDHNKSA-N	C1C(C(C(C(O1)O)O)O)O	-2.5	Organic oxygen compounds	Organooxygen compounds	Carbohydrates and carbohydrate conjugates	75.0087 10805535.6289|149.0456 9051774.7188|59.0138 5042143.1611|89.0245 2668772.1484|71.0139 2626103.2461	2.00269e+06
10.89_520.3404m/z	LPC 18:2	C26H50NO7P	10.8933	520.34	520.338	68.09	pos	[M+H]+	3.92727	11005824	SPJFYYJXNPEZDW-FTJOPAKQSA-N	CCCCCC=CCC=CCCCCCCCC(=O)OCC(COP(=O)([O-])OCC[N+](C)(C)C)O	5	Lipids and lipid-like molecules	Glycerophospholipids	Glycerophosphocholines	184.0732 8750808.3438|86.0969 2132631.3594|124.9999 1664497.2500|60.0814 395764.5000|139.0387 299402.9063	1.43358e+06
1.86_301.0931m/z	Tetillapyrone	C11H14O6	1.85683	301.093	301.093	55	neg	M+CH3COO	1.23073	11010113	IKQMMZYPEPBOGT-VGMNWLOBSA-N	CC1=C(OC(=O)C(=C1)C2CC(C(O2)CO)O)O	-0.3	Organic oxygen compounds	Organooxygen compounds	Carbohydrates and carbohydrate conjugates	123.0086 2953139.7500|138.0321 2320584.5000|139.0397 943151.7695|137.0243 711531.8750|124.0147 303206.8125	784837
11.01_341.0673m/z	Mirabijalone D	C18H14O7	11.0149	341.067	341.067	37.4	neg	M-H	1.67736	11013288	SUWMBRRWYKHHDH-UHFFFAOYSA-N	CC1=C(C=C2C(=C1O)C(=O)C3=C(O2)C(OC4=C3C=CC(=C4)O)O)OC	2.4	Phenylpropanoids and polyketides	Isoflavonoids	Rotenoids	341.0665 1202975.6719|326.0436 1137429.9375|298.0485 395424.9688|269.0447 148196.6426|193.0146 91743.3438	130991
6.29_463.1240m/z	Diosmetin-7-O-Beta-D-glucopyranoside	C22H22O11	6.29275	463.124	463.123	94.2	pos	M+H	1.20732	11016019	WKUHPOMCLBLCOV-MIUGBVLSSA-N	COC1=C(C=C(C=C1)C2=CC(=O)C3=C(C=C(C=C3O2)OC4C(C(C(C(O4)CO)O)O)O)O)O	0.8	Phenylpropanoids and polyketides	Flavonoids	Flavonoid glycosides	301.0707 4636136.0625|286.0470 1548797.4219|258.0525 539196.9844|86.0968 255537.0938|70.0657 244226.8125	493990
6.64_352.1181m/z	Oxyberberine	C20H17NO5	6.63878	352.118	352.118	35.3	pos	M+H	0.53809	11066	ZHYQCBCBTQWPLC-UHFFFAOYSA-N	COC1=C(C2=C(C=C1)C=C3C4=CC5=C(C=C4CCN3C2=O)OCO5)OC	2.9	Organoheterocyclic compounds	Isoquinolines and derivatives	Isoquinolones and derivatives	352.1163 1622087.8750|335.1747 1565734.4063|336.0865 637230.5000|308.0918 587920.0469|265.1340 587278.9766	143476
8.83_335.1866m/z	Solanapyrone B	C18H24O4	8.8312	335.187	335.186	54.2	neg	M-H+CH3OH	2.29563	11098743	YJHFAFJKTXEFDR-SFDCBXKLSA-N	CC1C=CC2CCCCC2C1C3=CC(=C(C(=O)O3)CO)OC	3.7	Organoheterocyclic compounds	Pyrans	Pyranones and derivatives	335.1832 7285853.3750|291.1961 3442769.9688|334.2124 514743.9063|290.2161 86040.6250|161.0457 80099.7656	554132
8.92_325.1433m/z	Chalcone base + 3O, 1Prenyl	C20H20O4	8.91957	325.143	325.143	97.07	pos	[M+H]+	-0.277415	11099375	TVUGLERLRIQATC-BJMVGYQFSA-N	CC(=CCC1=C(C=CC(=C1)C=CC(=O)C2=C(C=C(C=C2)O)O)O)C	5.1	Phenylpropanoids and polyketides	Linear 1,3-diarylpropanoids	Chalcones and dihydrochalcones	283.0961 906076.2344|325.1420 571445.0703|297.1116 269809.5879|268.0733 241242.5859|137.0596 230885.4082	118178
8.38_213.1497m/z	FA 12:1+1O	C12H22O3	8.37737	213.149	213.149	63.44	neg	[M-H]-	1.10876	11106737	RRJILZUCEDMMNU-SOFGYWHQSA-N	C(CCCCO)CCCC=CCC(=O)O	2.9	Organic acids and derivatives	Hydroxy acids and derivatives	Medium-chain hydroxy acids and derivatives	213.1497 2645347.5000|167.1439 866611.2109|169.1597 275645.2637|212.1377 127308.5938|168.1115 119096.6563	127436
7.94_363.1818m/z	Voafinidine	C20H28N2O2	7.93637	363.182	363.185	36.9	neg	M+Cl	-8.17751	11121012	LZWQFKGUQLBGKC-ZCNNSNEGSA-N	CCC12CCC3=C(CCN(C1)CC(C2O)O)C4=CC=CC=C4N3C	2.3	Alkaloids and derivatives	Quebrachamine alkaloids		363.1815 934826.3203|327.2184 470533.8145|291.1959 288322.7002|327.1240 222545.0137|301.1809 174929.7178	403337
2.26_131.0350m/z	2-C-Methyl-D-erythrono-1,4-lactone	C5H8O4	2.25885	131.035	131.035	56.1	neg	M-H	0.321867	11126294	OHTGZAWPVDWARE-NQXXGFSBSA-N	CC1(C(COC1=O)O)O	-1.2	Organoheterocyclic compounds	Lactones	Gamma butyrolactones	87.0451 8905690.6063|131.0347 2393900.3031|115.0035 1654028.0500|130.0873 1293450.6000|71.0138 726161.6250	4.027e+06
0.93_278.1244m/z	Linamarin	C10H17NO6	0.93485	278.124	278.124	59.9	neg	M-H+CH3OH	1.80194	11128	QLTCHMYAEJEXBT-ZEBDFXRSSA-N	CC(C)(C#N)OC1C(C(C(C(O1)CO)O)O)O	-1.8	Organic oxygen compounds	Organooxygen compounds	Carbohydrates and carbohydrate conjugates	116.0716 13315539.6563|128.0352 2411150.0078|101.0243 1022207.1250|188.0930 915290.7695|158.0826 569754.0000	663442
2.85_115.0869m/z	Prolinamide	C5H10N2O	2.85105	115.087	115.087	72.44	pos	[M+H]+	-2.25096	111306	VLJNHYLEOZPXFW-BYPYZUCNSA-N	C1CC(NC1)C(=O)N	-0.9	Organic acids and derivatives	Carboxylic acids and derivatives	Amino acids, peptides, and analogues	70.0657 8384259.0000|84.0448 1968921.1250|98.0604 1608445.5000|115.0867 1290874.4531|56.0501 1278243.5000	152632
6.62_401.1598m/z	Eupalinilide B	C20H24O6	6.61817	401.16	401.157	51.7	pos	M+H2O+Na	6.06431	11245337	HCGYMFPNEDDKQY-LSOVPSQHSA-N	CC(=CCO)C(=O)OC1CC(=C)C2C=CC(C2C3C1C(=C)C(=O)O3)(C)O	1.3	Lipids and lipid-like molecules	Prenol lipids	Terpene lactones	167.0702 699436.7881|383.1474 494321.4453|131.0493 474809.6191|176.0707 412757.1563|330.1094 347090.1250	518684
5.24_577.1378m/z	Procyanidin B1	C30H26O12	5.23895	577.138	577.135	90.7	neg	M-H	4.53492	11250133	XFZJEEAOWLFHDH-UKWJTHFESA-N	C1C(C(OC2=C1C(=CC(=C2C3C(C(OC4=CC(=CC(=C34)O)O)C5=CC(=C(C=C5)O)O)O)O)O)C6=CC(=C(C=C6)O)O)O	2.4	Phenylpropanoids and polyketides	Flavonoids	Biflavonoids and polyflavonoids	125.0244 102010.8438|289.0719 51336.8477|139.0402 49652.8828|137.0215 33988.1758|407.0736 32470.0625	2.10358e+06
1.31_102.0561m/z	O-Acetylethanolamine	C4H9NO2	1.30597	102.056	102.056	52.9	neg	M-H	0.683289	112720	HBVZRPAKZOLBPL-UHFFFAOYSA-N	CC(=O)OCCN	-0.8	Organic acids and derivatives	Carboxylic acids and derivatives	Carboxylic acid derivatives	59.0137 6813460.5000|57.0345 3312697.7500|85.0295 1510265.7500|101.0245 1102880.3750|73.0293 420557.3125	14085.8
6.06_319.0939m/z	2-Phenylethyl b-D-glucopyranoside	C14H20O6	6.06303	319.094	319.096	45.8	neg	M+Cl	-5.2335	11289099	MLRIJUWUQTVDQE-RKQHYHRCSA-N	C1=CC=C(C=C1)CCOC2C(C(C(C(O2)CO)O)O)O	-0.2	Organic oxygen compounds	Organooxygen compounds	Carbohydrates and carbohydrate conjugates	203.0828 1054210.5313|74.0248 860236.0625|283.0724 859904.9141|110.0247 607067.8887|109.0168 426995.7813	378121
7.09_429.0836m/z	Daidzein 7-O-glucuronide	C21H18O10	7.09037	429.084	429.083	66.1	neg	M-H	2.13093	11316354	MMIBOZXVZLENRZ-ZFORQUDYSA-N	C1=CC(=CC=C1C2=COC3=C(C2=O)C=CC(=C3)OC4C(C(C(C(O4)C(=O)O)O)O)O)O	0.9	Phenylpropanoids and polyketides	Isoflavonoids	Isoflavonoid O-glycosides	311.0559 928760.4375|385.0929 400454.9336|297.0402 350502.5625|285.0406 207045.6523|133.0294 199525.8066	261979
7.87_401.1247m/z	Brosimacutin G	C20H20O6	7.86798	401.125	401.124	53.6	neg	M+HCOO	1.52779	11325738	KJPLNWFZFTXFPY-FQMXMGHCSA-N	CC(C)(C1C(C2=C(O1)C=CC(=C2O)C(=O)C=CC3=CC=C(C=C3)O)O)O	3	Phenylpropanoids and polyketides	Linear 1,3-diarylpropanoids	Chalcones and dihydrochalcones	357.1345 725124.1094|297.0770 386175.3750|96.9601 381120.0625|312.0999 376803.0625|327.0974 230196.4063	156982
6.38_579.2112m/z	Styraxlignolide F	C27H34O11	6.38463	579.211	579.208	86.5	neg	M+HCOO	5.33516	11330069	AEMJDNJKSCBKRL-ZYKRCLGOSA-N	COC1=C(C=C(C=C1)CC2C(COC2=O)CC3=CC(=C(C=C3)OC4C(C(C(C(O4)CO)O)O)O)OC)OC	1.8	Lignans, neolignans and related compounds	Lignan glycosides		417.1568 40394.1660|181.0521 23369.5781|166.0282 21554.8281|151.0043 10757.9863|57.8893 10748.0840	439750
5.20_345.1107m/z	Eupalinilide D	C15H19ClO5	5.20073	345.111	345.11	35.6	neg	M-H+CH3OH	0.483915	11347578	JNRJLCSYIQFLDS-DKLFCYGSSA-N	CC1=CC(C2C1C3C(C(CC2(CCl)O)O)C(=C)C(=O)O3)O	-0.1	Lipids and lipid-like molecules	Prenol lipids	Terpene lactones	345.1081 1404584.2031|167.0615 1021414.5352|193.0773 401035.0859|301.1229 265193.5078|59.0138 253918.1250	117524
2.11_127.0503m/z	Thymine	C5H6N2O2	2.1144	127.05	127.05	76.1	pos	M+H	0.743205	1135	RWQNBRDOKXIBIV-UHFFFAOYSA-N	CC1=CNC(=O)NC1=O	-0.6	Organoheterocyclic compounds	Diazines	Pyrimidines and pyrimidine derivatives	127.0516 26006116.1406|110.0237 10628338.3854|84.0449 4409538.4710|109.0403 2279090.5417|109.0276 2126633.3737	8.10554e+06
2.15_539.1612m/z	10-Hydroxyoleoside dimethyl ester	C18H26O12	2.14938	539.161	539.162	40	neg	M+CH3COOH+HCOO	-1.26992	11351007	ZJOVYMALVBUVMI-BPOHLUMASA-N	COC(=O)CC1C(=COC(C1=CCO)OC2C(C(C(C(O2)CO)O)O)O)C(=O)OC	-2.9	Lipids and lipid-like molecules	Prenol lipids	Terpene glycosides	197.0453 1331984.5938|72.9930 488253.3242|135.0450 470727.7051|179.0346 451739.0723|123.0449 305026.6055	206324
6.11_283.1550m/z	alpha-Dihydroartemisinin	C15H24O5	6.1112	283.155	283.155	35.5	neg	M-H	-0.300862	11358077	BJDCWCLMFKKGEE-KDTBHNEXSA-N	CC1CCC2C(C(OC3C24C1CCC(O3)(OO4)C)O)C	2.5	Lipids and lipid-like molecules	Prenol lipids	Sesquiterpenoids	59.0138 806994.2842|283.1497 398452.4609|265.1497 89114.6162|282.1458 87143.9063|239.1215 84950.4033	1.11817e+06
6.53_451.1037m/z	Foramsulfuron	C17H20N6O7S	6.52622	451.104	451.104	73.29	neg	[M-H]-	0.492503	11419598	PXDNXJSDGQBLKS-UHFFFAOYSA-N	CN(C)C(=O)C1=C(C=C(C=C1)NC=O)S(=O)(=O)NC(=O)NC2=NC(=CC(=N2)OC)OC	0.5	Organic nitrogen compounds	Organonitrogen compounds	Sulfonylureas	341.0669 1990338.5938|189.0193 1211760.5313|217.0140 804683.8203|451.0972 584988.0938|177.0193 451792.7285	493177
10.89_278.0941n	Dihydrotanshinone I	C18H14O3	10.8933	279.101	279.102	88.5	pos	M+H, M+K, 2M+Na, M+Na	-0.618518	11425923	HARGZZNYNSYSGJ-JTQLQIEISA-N	CC1COC2=C1C(=O)C(=O)C3=C2C=CC4=C(C=CC=C43)C	3.2	Lipids and lipid-like molecules	Prenol lipids	Diterpenoids	301.0837 4519799.0938|230.1253 264531.1934|300.2071 164432.3594|55.0549 163825.7383|83.0860 115508.6797	6.9617e+07
9.80_283.1906m/z	Koninginin E	C16H26O4	9.80462	283.19	283.19	53.75	pos	[M+H]+	0.710517	11426065	INHVGPIPHZJQOP-ZNMIVQPWSA-N	CCCCCCC(C1CCC2=C(O1)C(CCC2=O)O)O	2.2	Organoheterocyclic compounds	Benzopyrans		283.1337 820548.1563|265.1815 406992.3164|265.1221 261432.9609|237.1310 152849.7539|109.0651 94052.8359	52756.1
6.11_259.1184m/z	Hexylitaconic acid	C11H18O4	6.1112	259.118	259.119	61.5	neg	M+HCOO	-1.44633	11447214	HKMDCNSGDQBQLI-UHFFFAOYSA-N	CCCCCCC(C(=C)C(=O)O)C(=O)O	2.9	Lipids and lipid-like molecules	Fatty Acyls	Fatty acids and conjugates	197.1185 472498.6875|259.1123 469472.7813|171.1034 414440.4297|215.1298 243172.0469|87.0089 180830.5469	101506
12.13_347.2236m/z	Monomethyl kolavate	C21H32O4	12.1308	347.224	347.223	79.6	neg	M-H	2.33825	11462192	CCDSRPQULZAXRF-LIECZFJOSA-N	CC1CCC2(C(C1(C)CCC(=CC(=O)OC)C)CCC=C2C(=O)O)C	5.8	Lipids and lipid-like molecules	Prenol lipids	Diterpenoids	347.2231 1747626.4219|61.9884 32275.5977|346.2271 13412.5166|96.9584 9467.3457|59.0132 7121.1489	108895
5.98_449.2034m/z	Breyniaionoside A	C19H32O9	5.98358	449.203	449.203	69.7	neg	M+HCOO	1.36682	11475194	JTIZGDFRGKUHKK-XUQLTRDPSA-N	CC1CC(=O)CC(C1(C=CC(CO)OC2C(C(C(C(O2)CO)O)O)O)O)(C)C	-1.8	Lipids and lipid-like molecules	Fatty Acyls	Fatty acyl glycosides	449.2050 2292454.4688|269.1385 2018363.4531|59.0137 1737855.6641|96.9599 743518.1250|209.1181 708498.9258	1.50584e+06
5.63_447.0941m/z	Homoorientin	C21H20O11	5.62528	447.094	447.093	84.4	neg	M-H	1.81558	114776	ODBRNZZJSYPIDI-VJXVFPJBSA-N	C1=CC(=C(C=C1C2=CC(=O)C3=C(O2)C=C(C(=C3O)C4C(C(C(C(O4)CO)O)O)O)O)O)O	-0.2	Phenylpropanoids and polyketides	Flavonoids	Flavonoid glycosides	327.0512 771410.6250|357.0616 495781.0000|447.0886 481952.0000|59.0138 425746.6973|61.9883 409708.4063	274869
11.20_321.2076m/z	Benzeneethanol, 4-octyl-, 1-acetate	C18H28O2	11.2041	321.208	321.207	56.5	neg	M+HCOO	1.59483	11482779	GBRYLJCBBFSRPK-UHFFFAOYSA-N	CCCCCCCCC1=CC=C(C=C1)CCOC(=O)C	6.1	Benzenoids	Benzene and substituted derivatives		321.2072 1556362.8281|277.2173 693009.3750|321.0363 39684.9531|320.2382 27021.4980|79.9586 17045.5137	79908.9
5.86_297.0760m/z	Liquiritigenin	C15H12O4	5.85932	297.076	297.074	77	pos	M+H2O+Na	8.26205	114829	FURUXTVZLHCCNA-AWEZNQCLSA-N	C1C(OC2=C(C1=O)C=CC(=C2)O)C3=CC=C(C=C3)O	2.2	Phenylpropanoids and polyketides	Flavonoids	Flavans	279.0652 4135170.1250|233.0599 1699868.6563|297.0742 1141122.0000|205.0648 1036278.6563|261.0547 818334.9219	245478
6.28_316.1194m/z	Higenamine	C16H17NO3	6.28238	316.119	316.119	52.2	neg	M+HCOO	1.20031	114840	WZRCQWQRFZITDX-UHFFFAOYSA-N	C1CNC(C2=CC(=C(C=C21)O)O)CC3=CC=C(C=C3)O	2.2	Organoheterocyclic compounds	Isoquinolines and derivatives	Benzylisoquinolines	244.1334 983085.5859|316.1194 838822.6875|272.1288 779870.1406|215.1074 773687.4531|315.1411 201029.8750	186597
1.17_144.0430n	3-oxo-C4-homoserine lactone	C8H11NO4	1.16667	184.061	184.061	57.98	neg	[M-H]-	5.11656	11513882	FIHPLICEAUNEFV-UHFFFAOYSA-N	CC(=O)CC(=O)NC1CCOC1=O	0	Organic acids and derivatives	Carboxylic acids and derivatives	Amino acids, peptides, and analogues	140.0715 14635063.1875|184.0613 12284211.0469|98.0609 2201245.9492|141.0532 1604717.5938|97.0657 1191541.6250	2.1688e+06
5.92_183.0901n	3-hydroxy-C6-homoserine lactone	C10H17NO4	5.91702	214.108	214.108	80.89	neg	[M-H]-	3.09299	11579405	CRCIHGGZGGATGM-UHFFFAOYSA-N	CCCC(CC(=O)NC1CCOC1=O)O	0.7	Organic acids and derivatives	Carboxylic acids and derivatives	Amino acids, peptides, and analogues	130.0872 1272912.2344|214.1089 721850.7500|187.0401 433953.4375|171.1025 292513.2813|142.0656 191750.9023	142971
2.17_198.0528n	Danshensu	C9H10O5	2.1738	197.046	197.046	94.7	neg	M-H, M+CH3COO	-0.0811299	11600642	PAFLSMZLRSPALU-MRVPVSSYSA-N	C1=CC(=C(C=C1CC(C(=O)O)O)O)O	-0.2	Phenylpropanoids and polyketides	Phenylpropanoic acids		135.0450 75049480.5789|72.9931 73260118.1199|123.0450 52644588.4972|179.0348 49037714.7688|197.0462 22137551.9930	1.79472e+08
5.57_365.1827m/z	Kankanoside E	C16H28O8	5.57343	365.183	365.181	62.7	neg	M-H+H2O	4.66691	11653163	FOXBWGQSBSJEOT-FHMJDAQXSA-N	CC(CCC=C(C)C(=O)O)CCOC1C(C(C(C(O1)CO)O)O)O	0.3	Lipids and lipid-like molecules	Saccharolipids		365.1847 4574861.8750|59.0139 694295.6875|203.1291 665107.6602|71.0140 391285.1875|101.0244 322825.5625	834389
4.99_224.0565m/z	3,4-Dihydroxycinnamamide	C9H9NO3	4.98915	224.056	224.056	36.7	neg	M+HCOO	0.0414316	11658379	ZINBYEVHNDIYBV-DUXPYHPUSA-N	C1=CC(=C(C=C1C=CC(=O)N)O)O	0.5	Phenylpropanoids and polyketides	Cinnamic acids and derivatives	Hydroxycinnamic acids and derivatives	94.0297 5184947.4375|108.0453 703701.4648|59.0137 486989.6563|224.0578 443759.5938|135.0450 417071.3750	427565
8.53_509.2393m/z	Wortmannilactone A	C24H34O6	8.5265	509.239	509.239	62.3	neg	M+HCOOH+HCOO	0.253043	11697405	FYXXVPQBBFJUET-BQRLCHNUSA-N	CC(CC1CC=CC=CC=CC(CC(CC(CC=CC=CC=CC(=O)O1)O)O)O)O	3.8	Phenylpropanoids and polyketides	Macrolides and analogues		333.2071 1210329.3906|113.0243 463884.4854|96.9697 339229.4063|85.0296 250410.0439|78.9591 217424.1597	145398
8.86_347.1868m/z	Triptoquinone B	C20H26O4	8.85622	347.187	347.186	82.5	neg	M-H+H2O	3.10991	11724191	RYYRZMIBKOKIRO-UIAACRFSSA-N	CC(C)C1=CC(=O)C2=C(C1=O)CCC3C2(CCC(=O)C3(C)CO)C	2.7	Lipids and lipid-like molecules	Steroids and steroid derivatives	Oxosteroids	347.1867 7015476.3750|317.1761 2786112.4688|287.1650 1142991.7109|299.1657 793342.1719|269.1529 241790.1094	834621
6.98_178.0631n	Flavanone base + 4O, 1Prenyl	C20H20O6	6.97765	357.134	357.133	92.78	pos	[M+H]+	0.663689	11725803	SFQIGPZCFNTPOD-UHFFFAOYSA-N	CC(=CCC1=C(C(=CC(=C1)C2CC(=O)C3=C(C=C(C=C3O2)O)O)O)O)C	4	Phenylpropanoids and polyketides	Flavonoids	Flavans	144.0808 4772816.4063|137.0598 3186384.3281|110.0968 1011140.5430|356.2056 837213.0000|152.0571 816942.8125	770324
4.77_273.0880m/z	Aspernigrin A	C13H12N2O2	4.77263	273.088	273.088	41.3	neg	M+HCOO	-0.142242	11736320	RUUZDCZRFRLJFC-UHFFFAOYSA-N	C1=CC=C(C=C1)CC2=CC(=O)C(=CN2)C(=O)N	1.7	Organoheterocyclic compounds	Pyridines and derivatives	Pyridinecarboxylic acids and derivatives	229.0983 558786.4258|185.1087 226699.6582|92.0505 199948.7656|116.0507 175040.3633|100.0404 110799.2813	36722.1
7.54_375.1824m/z	Norcaesalpinin E	C21H28O6	7.5412	375.182	375.181	73.8	neg	M-H	2.84762	11773291	IBALQPBIWZLHPR-SJEMMDPOSA-N	CC(=O)OC1CCC(C2(C1(C3CC4=C(C=CO4)C(=O)C3C(C2)O)C)O)(C)C	2.1	Organoheterocyclic compounds	Naphthofurans		375.1820 2720090.5000|135.0451 1574197.6875|109.0293 252031.4531|121.0294 199302.7188|122.0372 183191.6875	661562
6.16_151.0401m/z	Vanillin	C8H8O3	6.16403	151.04	151.04	98.2	neg	M-H	0.124602	1183	MWOOGOJBHIARFG-UHFFFAOYSA-N	COC1=C(C=CC(=C1)C=O)O	1.2	Benzenoids	Phenols	Methoxyphenols	136.0166 47284443.5586|151.0405 7625556.4635|92.0255 3293921.5765|108.0210 1415171.5781|59.0138 531735.4486	9.81641e+06
9.76_203.0714m/z	Senkyunolide E	C12H12O3	9.76415	203.071	203.071	63.6	neg	M-H	0.157503	11830530	RAGLCXMIVOLFJJ-XFFZJAGNSA-N	CCC(C=C1C2=CC=CC=C2C(=O)O1)O	1.9	Organoheterocyclic compounds	Isocoumarans	Isobenzofuranones	203.0708 22203688.8203|174.0320 4391330.7734|159.0813 3087072.4902|130.0423 2349015.4141|131.0498 1931873.1992	2.82885e+06
4.54_310.1299m/z	4-Hydroxymethylphenol 1-O-rhamnoside	C13H18O6	4.5418	310.13	310.129	62	neg	M-H+CH3CN	3.07689	11832457	VKJJAXLYSFNXBM-HPMQQCADSA-N	CC1C(C(C(C(O1)OC2=CC=C(C=C2)CO)O)O)O	-0.3	Organic oxygen compounds	Organooxygen compounds	Carbohydrates and carbohydrate conjugates	191.0562 5378155.0000|93.0346 1089268.6250|164.0717 1003631.9219|177.0559 720328.8125|137.0245 702886.5000	300070
5.01_160.0527n	4-Methylcoumarin	C10H8O2	5.00895	161.06	161.059	91	pos	[M+H]+	1.47557	11833	PSGQCCSGKGJLRL-UHFFFAOYSA-N	CC1=CC(=O)OC2=CC=CC=C12	2.3	Phenylpropanoids and polyketides	Coumarins and derivatives		105.0702 20145179.2500|133.0648 12732986.6875|115.0544 5899544.4375|161.0596 4278376.1875|103.0546 4224644.7656	1.28775e+07
5.25_374.1601m/z	Seneciphylline	C18H23NO5	5.24667	374.16	374.158	44.3	pos	M+H2O+Na	6.5273	118701603	FCEVNJIUIMLVML-GOQJIKJNSA-N	CC=C1CC(=C)C(C(=O)OCC2=CCN3C2C(CC3)OC1=O)(C)O	0.7				222.1126 993313.8594|374.1534 950894.3750|86.0969 685645.6543|150.0913 669946.2891|123.0441 581220.7676	526785
5.59_237.0404m/z	Erythrocentauric acid	C10H8O4	5.58695	237.04	237.04	72.9	neg	M+HCOO	-0.239289	118726453	VOPDFFBAKXNSRA-UHFFFAOYSA-N	C1COC(=O)C2=C1C(=CC=C2)C(=O)O	1.3	Benzenoids	Benzene and substituted derivatives	Benzoic acids and derivatives	134.0372 15731280.5625|237.0394 13598646.8750|178.0272 7033548.1563|149.0607 2745301.2813|193.0502 2075736.2500	3.24432e+06
8.78_290.1388m/z	Dihydrolycorine	C16H19NO4	8.77833	290.139	290.139	47.1	pos	M+H	0.490658	11876135	VJILFEGOWCJNIK-MGRBZGILSA-N	C1CN2CC3=CC4=C(C=C3C5C2C1CC(C5O)O)OCO4	0.7	Alkaloids and derivatives	Amaryllidaceae alkaloids	Lycorine-type amaryllidaceae alkaloids	272.1272 574369.8750|273.1874 420762.9688|131.0855 270409.7178|105.0701 259287.7314|91.0546 250634.5562	56220.8
0.86_102.0561m/z	4-Aminobutyric acid	C4H9NO2	0.8594	102.056	102.056	56.4	neg	M-H	0.0616849	119	BTCSSZJGUNDROE-UHFFFAOYSA-N	C(CC(=O)O)CN	-3.2	Organic acids and derivatives	Carboxylic acids and derivatives	Amino acids, peptides, and analogues	59.0138 915651.3623|102.0560 477438.6191|55.0188 170820.3398|73.0295 164526.4688|101.0243 86144.0195	52540.7
1.54_143.0351m/z	Methyl furan-2-carboxylate	C6H6O3	1.54383	143.035	143.034	37.5	neg	M-H+H2O	5.63539	11902	HDJLSECJEQSPKW-UHFFFAOYSA-N	COC(=O)C1=CC=CO1	1	Organoheterocyclic compounds	Furans	Furoic acid and derivatives	102.0560 812753.7324|57.0344 552434.1001|99.0451 474708.2012|71.0139 451967.9204|101.0610 420215.3352	1.74307e+06
8.51_275.0922m/z	Euparin	C13H12O3	8.5129	275.092	275.093	64.4	neg	M+CH3COO	-1.21653	119039	OPUFDNZTKHPZHM-UHFFFAOYSA-N	CC(=C)C1=CC2=CC(=C(C=C2O1)O)C(=O)C	3.6	Organoheterocyclic compounds	Benzofurans		245.0455 1711941.7031|260.0688 1394518.8594|275.0903 1344634.3906|217.0507 623505.8750|186.0325 181544.5303	242246
11.27_384.1804m/z	(6aS)-1,2,9,10-tetramethoxy-6-methyl-5,6,6a,7-tetrahydro-4H-dibenzo[de,g]quinoline-3-carbaldehyde	C22H25NO5	11.269	384.181	384.179	80.44	pos	[M+H]+	5.01562	11908466	CLSKRRFGIZCINS-INIZCTEOSA-N	CN1CCC2=C(C(=C(C3=C2C1CC4=CC(=C(C=C43)OC)OC)OC)OC)C=O	2.8	Alkaloids and derivatives	Aporphines		191.1066 1298279.2188|261.0905 378197.3594|193.1224 345423.2539|383.2088 318543.7500|279.1012 266251.7500	240215
4.16_169.0508m/z	(R)-Mandelic acid	C8H8O3	4.16063	169.051	169.05	43.2	neg	M-H+H2O	5.0481	11914	IWYDHOAUDWTVEP-SSDOTTSWSA-N	C1=CC=C(C=C1)C(C(=O)O)O	0.6	Benzenoids	Benzene and substituted derivatives		125.0606 1445593.0957|169.0484 1435305.9160|82.9962 278394.3125|151.0376 268804.2852|107.0501 252841.4463	696989
7.32_359.1488m/z	Matairesinol	C20H22O6	7.31978	359.149	359.149	97.15	pos	[M+H]+	-0.269262	119205	MATGKVZWFZHCLI-LSDHHAIUSA-N	COC1=C(C=CC(=C1)CC2COC(=O)C2CC3=CC(=C(C=C3)O)OC)O	3.3	Lignans, neolignans and related compounds	Furanoid lignans	Tetrahydrofuran lignans	163.0398 355049.7031|131.0491 322223.5527|177.0547 275887.7578|151.0399 233448.6201|137.0600 206418.1543	169587
8.77_515.3017m/z	Cucurbitacin S	C30H42O6	8.77277	515.302	515.301	64.2	neg	M-H+H2O	1.78003	119287	MBYLRWSUZLFUTO-PQNVQGKDSA-N	CC1C2C(CC3(C2(CC(=O)C4(C3CC=C5C4C=C(C(=O)C5(C)C)O)C)C)C)OC(CC1=O)C(C)(C)O	3.2	Lipids and lipid-like molecules	Steroids and steroid derivatives	Oxosteroids	515.3009 874136.7344|285.1471 370248.2461|300.1721 237685.1406|299.1639 126446.7656|497.2914 126373.3223	184666
9.40_537.3066m/z	Cyasterone	C29H44O8	9.403	537.307	537.306	37.9	neg	M-H+H2O	0.468871	119444	NEFYSBQJYCICOG-YSEUJXISSA-N	CC1C(C(OC1=O)C)CC(C(C)(C2CCC3(C2(CCC4C3=CC(=O)C5C4(CC(C(C5)O)O)C)C)O)O)O	1	Lipids and lipid-like molecules	Prenol lipids	Triterpenoids	537.3085 424851.2969|173.0819 420923.3770|295.0614 194779.8555|109.0293 138153.6313|57.0346 135272.4531	119136
1.10_454.1934m/z	Neolinustatin	C17H29NO11	1.09995	454.193	454.192	67.5	neg	M-H+CH3OH	2.26932	119533	WOSYVGNDRYBQCQ-BARGLTKPSA-N	CCC(C)(C#N)OC1C(C(C(C(O1)COC2C(C(C(C(O2)CO)O)O)O)O)O)O	-3.3	Organic oxygen compounds	Organooxygen compounds	Carbohydrates and carbohydrate conjugates	130.0871 3644681.5156|101.0242 518245.5469|202.1082 408545.1367|128.0351 381860.2188|59.0137 174993.3125	386312
6.18_487.2406m/z	Vindoline	C25H32N2O6	6.17882	487.241	487.245	58.9	neg	M-H+CH3OH	-8.31896	11953805	CXBGOBGJHGGWIE-MXXIQHGTSA-N	CCC12C=CCN3C1C4(CC3)C(C(C2OC(=O)C)(C(=O)OC)O)N(C5=C4C=CC(=C5)OC)C	1.3	Alkaloids and derivatives	Plumeran-type alkaloids		98.0247 802179.5742|191.0562 644026.5820|469.2315 515822.4922|487.2470 436725.6992|116.0716 357649.0000	167081
6.70_605.1528m/z	3-O-Caffeoyl-4-O-sinapoylquinic acid	C27H28O13	6.69933	605.153	605.151	41	neg	M+HCOO	2.89752	11962122	BEDSGEULUAVXQH-YGCGHWCOSA-N	COC1=CC(=CC(=C1O)OC)C=CC(=O)OC2C(CC(CC2OC(=O)C=CC3=CC(=C(C=C3)O)O)(C(=O)O)O)O	1.8	Organic oxygen compounds	Organooxygen compounds	Alcohols and polyols	341.0667 271347.5703|298.0475 258877.0117|117.0190 220875.3906|312.0639 160310.1211|605.1508 145059.9063	440373
5.97_581.1537m/z	Linaroside	C23H24O11	5.97148	581.154	581.151	81.4	neg	M+CH3COOH+HCOO	5.35304	11972339	JNNRILAYMZYEQB-FZFRBNDOSA-N	COC1=CC=C(C=C1)C2=CC(=O)C3=C(C(=C(C=C3O2)OC4C(C(C(C(O4)CO)O)O)O)OC)O	1.2	Phenylpropanoids and polyketides	Flavonoids	Flavonoid glycosides	151.0026 78326.7266|135.0459 58141.1367|581.1634 22113.2578|445.1021 16811.4453|209.9202 15530.3682	612559
9.52_319.2281m/z	8-HETE	C20H32O3	9.5184	319.228	319.228	60.5	neg	[M-H]1-	0.840239	11976122	NLUNAYAEIJYXRB-HEJOTXCHSA-N	CCCCCC=CCC=CC=CC(CC=CCCCC(=O)O)O	5.2	Lipids and lipid-like molecules	Fatty Acyls	Eicosanoids	319.2294 3739619.0000|149.0241 43360.4922|149.0601 33732.8438|301.1428 24751.0273|59.0132 24470.0020	140212
7.08_162.0687n	5-Hydroxy-1-tetralone	C10H10O2	7.07648	193.087	193.086	42.7	neg	M-H+H2O, M-H+CH3OH	3.91776	119921	YPPZCRZRQHFRBH-UHFFFAOYSA-N	C1CC2=C(C=CC=C2O)C(=O)C1	2.1	Benzenoids	Tetralins		193.0868 44691316.0000|108.0216 10104809.7500|134.0372 3964157.3281|109.0292 3146325.0078|136.0166 3036842.4219	975677
8.54_307.1917m/z	Coronadiene	C17H26O2	8.54048	307.192	307.191	58.3	neg	M+HCOO	0.660257	11995069	GZRHZZSARAUGHK-VIJNKSRKSA-N	CC1(CCCC2(C1CCC(=C)C2C=CC(=O)O)C)C	4.8	Organic acids and derivatives	Carboxylic acids and derivatives	Carboxylic acids	307.1922 2097401.5000|185.1183 458488.5840|74.0248 307450.9063|205.0866 306745.4473|289.1813 302780.1094	702759
0.98_129.0193m/z	Citraconic acid anhydride	C5H4O3	0.975383	129.019	129.019	70.6	neg	M-H+H2O	4.70889	12012	AYKYXWQEBUNJCN-UHFFFAOYSA-N	CC1=CC(=O)OC1=O	0.2	Organoheterocyclic compounds	Dihydrofurans	Furanones	85.0296 6986662.1875|101.0245 2572132.9609|129.0191 1612260.8750|55.0189 1283336.7031|73.0297 421625.5938	3.84655e+06
10.52_387.1821m/z	Caesalmin B	C22H28O6	10.5191	387.182	387.181	74.8	neg	M-H	1.94196	12037261	GXBMHMVGIRRPBD-XTVZKPICSA-N	CC(=O)OC1CCC(C2(C1(C3CC4=C(C=CO4)C5C3C(C2)OC5=O)C)O)(C)C	2.9	Lipids and lipid-like molecules	Prenol lipids	Terpene lactones	387.1794 1001167.1563|327.1607 778693.7344|283.1340 700280.3281|59.0138 231610.3594|96.9601 120695.4063	109405
1.46_115.0401m/z	Ethyl pyruvate	C5H8O3	1.45658	115.04	115.04	38.8	neg	M-H	0.117081	12041	XXRCUYVCPSWGCC-UHFFFAOYSA-N	CCOC(=O)C(=O)C	0.4	Organic acids and derivatives	Keto acids and derivatives	Alpha-keto acids and derivatives	73.0294 15569783.4000|114.0560 2284502.7000|99.0086 1629432.0750|99.9261 679027.2000|114.9339 264644.1688	2.39836e+06
12.49_315.1972m/z	Hedychenone	C20H26O2	12.4914	315.197	315.196	46.8	neg	M-H+H2O	4.00583	12067184	MXTCKNHXBBXULO-ZJDHVTHPSA-N	CC1=CC(=O)C2C(CCCC2(C1C=CC3=COC=C3)C)(C)C	4.9	Lipids and lipid-like molecules	Prenol lipids	Diterpenoids	315.1970 575941.7344|285.1943 29178.9336|59.0138 25912.5410|232.9745 24530.1055|299.1621 23491.0791	93770.6
4.39_256.0583n	Piscidic acid	C11H12O7	4.39245	255.051	255.051	37.3	neg	M-H, M-H+CH3CN	-0.143136	120693	TUODPMGCCJSJRH-UHFFFAOYSA-N	C1=CC(=CC=C1CC(C(C(=O)O)O)(C(=O)O)O)O	-0.5	Phenylpropanoids and polyketides	Phenylpropanoic acids		180.0668 319187.2305|260.0561 273456.7617|110.0247 147713.1094|109.0166 132161.9688|278.0665 113484.3047	1.44746e+06
5.65_479.1190m/z	Nepetin-7-glucoside	C22H22O12	5.64502	479.119	479.118	66.1	pos	M+H	1.16109	120742	DMXHXBGUNHLMQO-IWLDQSELSA-N	COC1=C(C=C2C(=C1O)C(=O)C=C(O2)C3=CC(=C(C=C3)O)O)OC4C(C(C(C(O4)CO)O)O)O	0.5	Phenylpropanoids and polyketides	Flavonoids	Flavonoid glycosides	317.0654 4395208.0313|131.0491 1466358.3242|86.0969 732823.1406|302.0420 566314.0625|100.0760 528570.3750	220688
6.46_165.0558m/z	p-Ethoxybenzoic acid	C9H10O3	6.46123	165.056	165.056	62.7	neg	M-H	0.709159	12093	SHSGDXCJYVZFTP-UHFFFAOYSA-N	CCOC1=CC=C(C=C1)C(=O)O	2.4	Benzenoids	Benzene and substituted derivatives	Benzoic acids and derivatives	150.0322 3452706.9141|165.0557 712676.2744|121.0293 344545.9766|122.0372 279286.8496|151.0038 200204.2148	423722
5.79_110.0369n	5-Methyl-2-furaldehyde	C6H6O2	5.79102	155.035	155.035	61.9	neg	M-H, M+HCOO	1.11558	12097	OUDFNZMQXZILJD-UHFFFAOYSA-N	CC1=CC=C(O1)C=O	0.7	Organic oxygen compounds	Organooxygen compounds	Carbonyl compounds	155.0348 3816515.9375|111.0448 3468891.0469|81.0344 1193512.0234|109.0293 733019.9766|83.0501 464362.2852	267486
6.19_153.0546m/z	Isovanillin	C8H8O3	6.19405	153.055	153.055	74.1	pos	M+H	-0.00064405	12127	JVTZFYYHCGSXJV-UHFFFAOYSA-N	COC1=C(C=C(C=C1)C=O)O	1	Benzenoids	Phenols	Methoxyphenols	93.0338 9892586.7563|125.0598 4926520.1953|65.0392 3704987.6797|153.0547 2640418.0188|135.0443 826838.9344	7.59217e+06
4.85_278.0799n	3-O-Debenzoylzeylenone	C14H14O6	4.85163	369.084	369.082	36	neg	M+CH3COO, M+HCOOH+HCOO	2.96452	122184806	ISGGRGRMTBVSEN-SCDSUCTJSA-N	C1=CC=C(C=C1)C(=O)OCC2(C(C(C=CC2=O)O)O)O	-0.4	Benzenoids	Benzene and substituted derivatives	Benzoic acids and derivatives	128.0352 477436.0313|191.0562 460597.4277|85.0295 299562.3940|133.0296 270083.9268|93.0345 254100.6387	1.20117e+06
9.36_383.1505m/z	Bavachinin	C21H22O4	9.36448	383.15	383.15	80.9	neg	M+HCOO	1.34365	122835	VOCGSQHKPZSIKB-UHFFFAOYSA-N	CC(=CCC1=CC2=C(C=C1OC)OC(CC2=O)C3=CC=C(C=C3)O)C	4.4	Phenylpropanoids and polyketides	Flavonoids	Flavans	339.1606 1091630.2813|324.1367 148774.2578|280.1464 88317.7236|383.1395 82332.0996|134.0374 74672.6797	148485
8.71_401.2074m/z	Uncarine E	C21H24N2O4	8.71152	401.207	401.207	65.4	pos	M+CH3OH+H	0.909786	12304287	JMIAZDVHNCCPDM-GKELRCLMSA-N		1.6				401.2072 5202286.8125|160.0758 3285604.9844|369.1810 1904726.8438|327.1702 1518555.8750|295.1442 1152059.0313	1.24448e+06
10.57_415.2136m/z	Arenobufagin	C24H32O6	10.5746	415.214	415.213	45.1	neg	M-H	2.29857	12305198	JGDCRWYOMWSTFC-AZGSIFHYSA-N	CC12CCC(CC1CCC3C2C(C(=O)C4(C3(CCC4C5=COC(=O)C=C5)O)C)O)O	1.7	Lipids and lipid-like molecules	Steroids and steroid derivatives	Steroid lactones	371.2228 230936.7344|161.0971 189768.3574|61.9883 188783.8906|327.2341 137204.0762|163.1126 128670.5981	123913
7.22_437.1460m/z	Neposide	C19H22O8	7.21712	437.146	437.145	53.1	neg	M+CH3COO	1.87189	12313291	DNABNTQMDXKPON-ZIIYPAMZSA-N	CC1=CC2=C(C(=CC=C2)O)C(=C1C(=O)C)OC3C(C(C(C(O3)CO)O)O)O	0.7	Organic oxygen compounds	Organooxygen compounds	Carbohydrates and carbohydrate conjugates	275.0915 3544715.5313|260.0681 2442873.5000|245.0449 2241828.5781|217.0503 391215.5742|61.9883 289109.0000	283738
7.62_454.3450n	Oleanonic acid	C30H46O3	7.62357	437.342	437.341	47.1	pos	M+H-H2O, M+H	0.643404	12313704	FMIMFCRXYXVFTA-FUAOEXFOSA-N	CC1(CCC2(CCC3(C(=CCC4C3(CCC5C4(CCC(=O)C5(C)C)C)C)C2C1)C)C(=O)O)C	7.2	Lipids and lipid-like molecules	Prenol lipids	Triterpenoids	189.1636 247571.6777|409.3489 212259.2930|203.1799 210468.2051|95.0859 206508.9639|119.0856 206304.8750	535847
10.29_489.3579m/z	Rotundic acid	C30H48O5	10.2941	489.358	489.357	39.3	pos	M+H	0.948948	12315075	YLHQFGOOMKJFLP-LTFXOGOQSA-N	CC1CCC2(CCC3(C(=CCC4C3(CCC5C4(CCC(C5(C)CO)O)C)C)C2C1(C)O)C)C(=O)O	5.3	Lipids and lipid-like molecules	Prenol lipids	Triterpenoids	95.0859 79259.8330|107.0859 70717.2456|119.0857 69238.6611|133.1010 50912.4985|81.0704 50105.3789	487809
7.88_413.0884m/z	9-Methoxycamptothecin	C21H18N2O5	7.88373	413.088	413.091	54.4	neg	M+Cl	-6.75731	123617	XVMZDZFTCKLZTF-NRFANRHFSA-N	CCC1(C2=C(COC1=O)C(=O)N3CC4=CC5=C(C=CC=C5OC)N=C4C3=C2)O	1	Alkaloids and derivatives	Camptothecins		369.0981 867727.8672|281.0446 653283.8047|295.0608 522497.8359|269.0445 384294.8633|413.0896 374879.6133	587158
4.92_491.1195m/z	Swertisin	C22H22O10	4.91843	491.12	491.119	64.8	neg	M+HCOO	0.0766499	124034	ABRULANJVVJLFI-DGHBBABESA-N	COC1=C(C(=C2C(=C1)OC(=CC2=O)C3=CC=C(C=C3)O)O)C4C(C(C(C(O4)CO)O)O)O	0.5	Phenylpropanoids and polyketides	Flavonoids	Flavonoid glycosides	191.0564 5821653.1563|353.0884 825082.0234|85.0298 232048.7344|137.0244 177278.8438|93.0346 109414.0078	1.15103e+06
6.30_277.1081m/z	Fraxinellone	C14H16O3	6.29593	277.108	277.108	72.8	neg	M+HCOO	-0.24469	124039	XYYAFLHHHZVPRN-GXTWGEPZSA-N	CC1=C2C(=O)OC(C2(CCC1)C)C3=COC=C3	2.5	Organoheterocyclic compounds	Isobenzofurans		277.1084 12731504.5000|123.0815 6867486.1875|233.1185 5935517.9375|189.1286 3689901.6250|165.0922 2567703.2344	1.67495e+06
9.82_277.1445m/z	Araliadiol	C15H20O2	9.82018	277.144	277.145	60.7	neg	M+HCOO	-0.141037	124355647	KZRIUXSFFOWKRO-USJBSMOHSA-N	CCCCCC=CC(C#CC#CC(C=C)O)O	3.3	Lipids and lipid-like molecules	Fatty Acyls	Fatty alcohols	233.1545 535847.2471|277.1483 409026.4063|149.0244 244293.5107|163.1127 237537.9082|277.0544 122108.1055	462569
1.25_247.0459m/z	Triglochinic acid	C7H8O6	1.24545	247.046	247.046	53.5	neg	M+CH3COO	-0.0876353	12444517	PQFOLJLIMNNJQY-DAFODLJHSA-N	C(C=C(CC(=O)O)C(=O)O)C(=O)O	-0.8	Organic acids and derivatives	Carboxylic acids and derivatives	Tricarboxylic acids and derivatives	229.0353 2446293.7891|247.0442 1629784.2734|141.0557 1264778.1504|80.9651 858346.3496|125.0244 678859.1172	3.3175e+06
1.93_296.0777m/z	1-Methoxyindole-3-carboxylic acid	C10H9NO3	1.92652	296.078	296.077	43.8	neg	M+CH3COOH+HCOO	0.979711	124476	NYXZLEZAQMDQPX-UHFFFAOYSA-N	CON1C=C(C2=CC=CC=C21)C(=O)O	1.9	Organoheterocyclic compounds	Indoles and derivatives	Indolecarboxylic acids and derivatives	173.0455 1932914.9277|93.0346 1528801.9688|122.0247 1020063.6631|296.0781 982378.2188|164.0577 723832.7617	2.71569e+06
7.09_317.0669m/z	()-Naringenin	C15H12O5	7.09037	317.067	317.067	68.6	neg	M+HCOO	1.00343	12532435	PNHSYFGFULSUDP-UHFFFAOYSA-N	C1=CC=C(C=C1)C(=O)OCC(=O)C2=C(C=C(C=C2)O)O	3				125.0243 516947.2070|317.0655 502805.7656|289.0715 387813.1133|152.0113 250878.9688|96.9600 80079.6875	57888.6
6.60_717.1527m/z	Yunnaneic acid G	C36H30O16	6.60013	717.153	717.146	51.7	neg	M-H	9.15982	125416168	CWAPEEAMMSAHDI-VVFTXPSUSA-N	C1=CC(=C(C=C1CC(C(=O)O)OC(=O)C2C(C3=C(C=CC(=C3O)O)C=C2C(=O)OC(CC4=CC(=C(C=C4)O)O)C(=O)O)C5=CC(=C(C=C5)O)O)O)O	3.9	Lignans, neolignans and related compounds	Aryltetralin lignans		321.0404 189598319.6914|519.0941 54750114.2402|339.0527 46729990.5098|185.0239 40198924.1641|109.0293 38138401.5039	4.01242e+08
1.06_330.0612m/z	2'-Deoxyadenosine 5'-monophosphate	C10H14N5O6P	1.05943	330.061	330.061	61.3	neg	M-H	0.937184	12599	KHWCHTKSEGGWEX-RRKCRQDMSA-N	C1C(C(OC1N2C=NC3=C(N=CN=C32)N)COP(=O)(O)O)O	-2.2	Nucleosides, nucleotides, and analogues	Purine nucleotides	Purine deoxyribonucleotides	78.9590 9184320.0000|134.0471 5204801.6875|330.0605 4956068.5000|195.0063 2953947.3750|96.9696 2144893.0000	270395
6.32_155.0703m/z	4-Hydroxybenzaldehyde	C7H6O2	6.32463	155.07	155.07	51.3	pos	M+CH3OH+H	0.214947	126	RGHHSNMVTDWUBI-UHFFFAOYSA-N	C1=CC(=CC=C1C=O)O	1.4	Organic oxygen compounds	Organooxygen compounds	Carbonyl compounds	95.0497 1153540.4258|123.0442 810982.5508|65.0392 686334.1289|94.0374 578594.0000|77.0391 411688.3809	57525.8
7.14_219.1744m/z	Nootkatone	C15H22O	7.13532	219.174	219.174	80.81	pos	[M+H]+	0.415744	1268142	WTOYNNBCKUYIKC-JMSVASOKSA-N	CC1CC(=O)C=C2C1(CC(CC2)C(=C)C)C	3.9	Lipids and lipid-like molecules	Prenol lipids	Sesquiterpenoids	131.0493 1964730.4036|219.1388 1176909.6953|173.1320 757671.1797|145.1012 723494.5391|105.0701 718725.7663	1.71411e+06
8.31_395.0764m/z	Daphnoretine Acetate	C21H14O8	8.3142	395.076	395.073	80.32	pos	[M+H]+	7.14698	1269245	JGZOXTSCOZGQNQ-UHFFFAOYSA-N	CC(=O)OC1=C(C=C2C=C(C(=O)OC2=C1)OC3=CC4=C(C=C3)C=CC(=O)O4)OC	3.4	Phenylpropanoids and polyketides	Coumarins and derivatives		395.0759 1991125.5000|311.0541 939921.0781|339.0889 119496.5059|105.0336 95048.3281|394.2926 68617.5625	209163
5.64_437.1693m/z	7-O-Methyl morroniside	C18H28O11	5.64093	437.169	437.166	58.8	neg	M-H+H2O	8.24229	127258930	IZODPOCIKVLNIL-BSUNYROJSA-N	CC1C2C(CC(O1)OC)C(=COC2OC3C(C(C(C(O3)CO)O)O)O)C(=O)OC	-1.3	Organic oxygen compounds	Organooxygen compounds	Carbohydrates and carbohydrate conjugates	57.0345 649874.7227|59.0138 495586.6563|99.0452 401379.2979|293.1242 321925.9609|101.0244 250909.6719	101378
5.26_261.0767m/z	3'-Hydroxyxanthyletin	C14H12O4	5.26452	261.077	261.076	61.4	neg	M-H+H2O	1.67495	129069558	FMYNVGVODWZNCM-UHFFFAOYSA-N	CC1(C(=CC2=C(O1)C=C3C(=C2)C=CC(=O)O3)O)C	2.2	Phenylpropanoids and polyketides	Coumarins and derivatives	Pyranocoumarins	261.0778 1223817.2500|189.0556 437055.8477|203.0713 370984.0859|187.0400 265656.1836|201.0556 259338.4375	73708.3
7.64_251.1288m/z	1-(4-Hydroxy-2,2-dimethylchroman-6-yl)ethanone	C13H16O3	7.63593	251.129	251.128	44.5	neg	M-H+CH3OH	2.24461	129887823	RNNQKZPVFGNIMY-NSHDSACASA-N	CC(=O)C1=CC2=C(C=C1)OC(CC2O)(C)C	1.5	Organoheterocyclic compounds	Benzopyrans	1-benzopyrans	251.1293 1418132.0781|189.0924 972402.2266|125.0608 437057.5293|207.1028 434576.8828|179.0719 313124.8711	108326
2.06_365.1381m/z	Picrocrocin	C16H26O7	2.05808	365.138	365.137	45.2	neg	M+Cl	2.58473	130796	WMHJCSAICLADIN-WYWSWGBSSA-N	CC1=C(C(CC(C1)OC2C(C(C(C(O2)CO)O)O)O)(C)C)C=O	-0.5	Organic oxygen compounds	Organooxygen compounds	Carbohydrates and carbohydrate conjugates	365.1378 1031520.8750|203.0828 729265.4805|116.0507 330020.0723|146.0824 295737.1602|275.1071 293085.3164	201338
5.34_401.1461m/z	Citrusin D	C16H22O8	5.34082	401.146	401.145	57.2	neg	M+CH3COO	2.32118	131752609	JOIDTHZGWZZGMU-IHWYPQMZSA-N	COC1=C(C=CC(=C1)C=CCOC2C(C(C(C(O2)CO)O)O)O)O	-0.3	Lipids and lipid-like molecules	Fatty Acyls	Fatty acyl glycosides	401.1461 2239931.5625|59.0138 1976188.8438|71.0138 1775601.5996|269.1027 1752601.3945|101.0244 1437894.4141	6.98323e+06
3.88_275.1035m/z	Unedone	C13H20O4	3.87532	275.104	275.106	57.6	neg	M+Cl	-8.53453	131845506	LDFIUMMLDMSDPH-UHFFFAOYSA-N	CC1=CC(=O)CC(C12C(O2)C(C(C)O)O)(C)C	-0.1	Organic oxygen compounds	Organooxygen compounds	Carbonyl compounds	203.0826 2116796.0313|116.0505 737646.9980|74.0248 310571.6484|142.0660 213901.5059|275.1102 213770.5835	580459
5.71_385.0935m/z	6-Demethoxy-9'-deoxycleomiscosin A	C19H16O6	5.71497	385.093	385.093	35.4	neg	M+HCOO	1.66184	131845760	SEWMOSBQSFJLTQ-QGHHPUGFSA-N	CC1C(OC2=C(O1)C3=C(C=C2)C=CC(=O)O3)C4=CC(=C(C=C4)O)OC	3.2	Lignans, neolignans and related compounds	Coumarinolignans		250.0624 356445.4141|341.1053 286780.3438|163.0399 245676.0625|297.1144 213575.1270|109.0292 178843.2124	146098
11.37_379.2497m/z	15,16-Epoxy-15-ethoxy-6beta,13-dihydroxylabd-8-en-7-one	C22H36O5	11.3673	379.25	379.249	71.5	neg	M-H	1.94772	131847420	UYEGQRIXYLIQFR-GHEHZWTJSA-N	CCOC1CC(CO1)(CCC2=C(C(=O)C(C3C2(CCCC3(C)C)C)O)C)O	3.3	Lipids and lipid-like molecules	Prenol lipids	Diterpenoids	379.2501 673587.7422|199.1341 288450.3809|179.1078 222858.4121|81.0710 107119.1719|135.1178 79475.5859	89996.7
5.87_199.0977m/z	5-O-Ethylcleroindicin D	C10H16O4	5.86737	199.098	199.098	60.8	neg	M-H	0.691628	131854244	ZAEAITRXNOLOMQ-GUBZILKMSA-N	CCOC1CC(=O)CC2C1(CCO2)O	-0.8	Organoheterocyclic compounds	Benzofurans		198.0852 648232.3750|199.0944 450263.9063|59.0138 353459.5938|154.0952 254145.5625|155.1050 155618.6875	115686
7.83_231.0662m/z	Musellactone	C13H12O4	7.82657	231.066	231.066	60.5	neg	M-H	-0.473027	131863283	YSIXDHZMGCCQOK-UHFFFAOYSA-N	COC1=C(C=C2C(=C1)CCC3C2=CC(=O)O3)O	1.4	Organoheterocyclic compounds	Naphthofurans		187.0764 1623061.5313|143.0865 1044638.5391|187.1109 130046.6680|215.0704 127413.3594|135.0816 109868.6328	106872
6.63_432.3476m/z	Peimine	C27H45NO3	6.6294	432.348	432.347	96.2	pos	M+H	0.862339	131900	IUKLSMSEHKDIIP-BZMYINFQSA-N	CC1CCC2C(C3CCC4C(C3CN2C1)CC5C4CC(C6C5(CCC(C6)O)C)O)(C)O	4.1	Lipids and lipid-like molecules	Steroids and steroid derivatives	Steroidal alkaloids	414.3367 15621937.7500|432.3483 14233784.2500|131.0491 400713.4531|397.0915 390203.6875|112.1122 327824.2500	1.23724e+06
2.17_395.0989m/z	Ethyl gallate	C9H10O5	2.1738	395.099	395.098	81.6	neg	2M-H	1.38323	13250	VFPFQHQNJCMNBZ-UHFFFAOYSA-N	CCOC(=O)C1=CC(=C(C(=C1)O)O)O	1.3	Benzenoids	Benzene and substituted derivatives	Benzoic acids and derivatives	197.0453 59726650.3250|72.9930 20601696.6250|179.0348 17656104.5844|135.0450 17309237.7514|123.0449 11473773.3641	1.10768e+08
5.15_477.1980m/z	Apiosylrhododendrin	C21H32O11	5.1513	477.198	477.197	53.3	neg	M-H+H2O	1.88234	132531945	QJVVGCSWIOLQDG-GESFCUFHSA-N	CC(CCC1=CC=C(C=C1)O)OC2C(C(C(C(O2)COC3C(C(CO3)(CO)O)O)O)O)O	-1.4	Lipids and lipid-like molecules	Fatty Acyls	Fatty acyl glycosides	59.0138 1361233.8770|181.0870 826154.6602|166.0634 612243.9473|71.0139 609924.1875|89.0245 410464.2114	215618
5.51_449.1098m/z	Cyanidin-3-O-glucoside chloride	C21H21ClO11	5.51	449.11	449.108	62.7	neg	M+?	4.37394	132989527	YTMNONATNXDQJF-YPMWAIJBSA-N	C1=CC(=C(C=C1C2=[O+]C3=CC(=CC(=C3C=C2OC4C(C(C(C(O4)CO)O)O)O)O)O)O)O.[Cl-]					61.9883 12900436.5117|287.0552 990419.7422|125.0243 851829.0625|449.1018 710726.6328|259.0610 698881.6875	180711
10.69_355.1918m/z	Saprirearine	C20H24O2	10.6919	355.192	355.191	78.1	neg	M+CH3COO	1.14105	133561927	DLCPEPBEODTUSV-FXAWDEMLSA-N	CC1=C2CCC(C3(C2=C(C=C1)C=C(C3=O)C(C)C)O)C(=C)C	4.6	Benzenoids	Tetralins		355.1911 5632585.0000|295.1700 1728936.1563|280.1464 1637965.4531|59.0138 1102704.3750|340.1682 681096.0469	459896
4.97_195.0663m/z	Isosclerone	C10H10O3	4.9727	195.066	195.066	57.2	neg	M-H+H2O	3.31749	13369486	ZXYYTDCENDYKBR-ZETCQYMHSA-N	C1CC(=O)C2=C(C1O)C=CC=C2O	1.1	Benzenoids	Tetralins		195.0661 2384652.5313|151.0401 2076358.1172|149.0609 1499939.6406|177.0557 1407143.1875|94.0299 1290783.5000	83654.1
5.29_271.0972m/z	n-Butyl alpha-D-fructofuranoside	C10H20O6	5.2918	271.097	271.095	58.1	neg	M+Cl	7.79057	13386214	XRGRZXPJJVQDJO-IMSYWVGJSA-N	CCCCOC1(C(C(C(O1)CO)O)O)CO	-0.5	Organic oxygen compounds	Organooxygen compounds	Carbohydrates and carbohydrate conjugates	241.0505 1636126.6406|271.0977 1062700.3750|256.0740 921704.4141|213.0556 635104.0273|185.0611 137811.4307	103206
9.38_335.2230m/z	2,2,5,5-Tetramethylcyclohexane-1,4-dione	C10H16O2	9.37758	335.223	335.223	62.2	neg	2M-H	0.715093	13390715	OTQZSPVHJYLKOL-UHFFFAOYSA-N	CC1(CC(=O)C(CC1=O)(C)C)C	1.2	Organic oxygen compounds	Organooxygen compounds	Carbonyl compounds	335.2242 3249462.4375|249.1494 1011559.8750|237.1495 679706.2188|85.0659 392466.1250|221.1178 179792.2070	361637
4.92_192.0595m/z	2,6-Dimethylquinoline	C11H11N	4.91843	192.06	192.058	48.9	neg	M+Cl	6.28275	13414	JJPSZKIOGBRMHK-UHFFFAOYSA-N	CC1=CC2=C(C=C1)N=C(C=C2)C	3	Organoheterocyclic compounds	Quinolines and derivatives		191.0560 47308658.7500|85.0296 8252663.7813|134.0374 4959057.0000|93.0346 2677741.4375|87.0088 2152811.2559	301242
6.57_401.0886m/z	6-Demethoxycleomiscosin A	C19H16O7	6.57007	401.089	401.088	41.2	neg	M+HCOO	2.32575	134715065	SPQBUENVXULSQS-NVXWUHKLSA-N	COC1=C(C=CC(=C1)C2C(OC3=C(O2)C=CC4=C3OC(=O)C=C4)CO)O	2.2	Lignans, neolignans and related compounds	Coumarinolignans		175.0400 1350035.1172|181.0508 517377.7637|163.0400 223553.7383|135.0451 151955.5469|129.0347 132196.3330	329332
7.22_373.1303m/z	Dihydrolicoisoflavone	C20H20O6	7.21712	373.13	373.129	57.9	neg	M-H+H2O	4.47729	134715142	BAEYWOSUJSUYFI-CQSZACIVSA-N	CC(=CCC1=C(C=CC(=C1O)C2COC3=CC(=CC(=C3C2=O)O)O)O)C	4.1	Phenylpropanoids and polyketides	Isoflavonoids	Isoflavans	135.0452 11863663.0000|179.0351 915866.7813|134.0375 709089.9375|329.1376 560385.8906|189.0923 277241.3750	113682
6.79_487.0888m/z	Nuezhenidic acid	C17H24O14	6.79183	487.089	487.086	47.3	neg	M+Cl	6.20841	134715173	ZGRZULFRVWCUPF-APYHETFTSA-N	COC(=O)C1=COC(C(C1CC(=O)O)(CC(=O)O)O)OC2C(C(C(C(O2)CO)O)O)O	-3.2	Lipids and lipid-like molecules	Prenol lipids	Terpene glycosides	325.0718 1237678.2813|147.0454 331957.0488|443.0992 239049.7734|311.0561 197751.6328|299.0559 132564.3184	182358
8.35_275.1285m/z	9-Methymyrrhone	C16H18O3	8.35265	275.129	275.128	38.6	neg	M-H+H2O	0.856329	134715235	YRLDTAQTJKXXFC-MRVPVSSYSA-N	CC1CC2=C3C(=COC3=C(C(=C2C(=O)C1)C)OC)C	3.6	Lipids and lipid-like molecules	Prenol lipids	Sesquiterpenoids	231.1412 936749.3516|275.1263 248597.2070|148.0531 156858.7451|275.0685 137902.2188|187.1104 69511.1328	103582
5.40_518.2366n	7-Z-Trifostigmanoside I	C24H38O12	5.40178	517.229	517.229	65.7	neg	M-H, M+CH3COO	0.483628	134715241	ZUOHPMUWXJPXFB-IJAFTANASA-N	CC1=CC(=O)CC(C1(C=CC(C)OC2C(C(C(C(O2)CO)O)O)OC3C(C(CO3)(CO)O)O)O)(C)C	-2.3	Lipids and lipid-like molecules	Fatty Acyls	Fatty acyl glycosides	209.9096 82596.7734|61.0144 30644.0703|92.7901 29689.2520|171.5495 26268.6582	7.76343e+06
2.70_529.1557m/z	Gentiournoside D	C23H28O13	2.69583	529.156	529.156	66.1	neg	M-H+H2O	0.0697669	134715243	CAKNXIQZWKLNKL-AOLCZBGXSA-N	CC1C(CC2C1C(OC=C2C(=O)O)OC3C(C(C(C(O3)CO)O)O)O)OC(=O)C4=C(C(=CC=C4)O)O	0.4	Lipids and lipid-like molecules	Prenol lipids	Terpene glycosides	193.0507 1894190.1875|134.0373 990157.0000|149.0607 369268.2031|178.0272 338398.4800|355.1040 160635.1299	454329
6.36_137.0244m/z	4-Hydroxybenzoic acid	C7H6O3	6.36098	137.024	137.024	95	neg	M-H	-0.0054838	135	FJKROLUGYXJWQN-UHFFFAOYSA-N	C1=CC(=CC=C1C(=O)O)O	1.6	Benzenoids	Benzene and substituted derivatives	Benzoic acids and derivatives	93.0346 63423353.4125|137.0242 24960063.3000|136.0167 906807.8125|92.0269 462124.3689|65.0395 376958.2303	1.24715e+07
1.02_151.0495n	Guanine	C5H5N5O	1.01537	152.057	152.057	67.3	pos	M+H, M+K, 2M+H	0.299414	135398634	UYTPUPDQBNUYGX-UHFFFAOYSA-N	C1=NC2=C(N1)C(=O)NC(=N2)N	-1.1	Organoheterocyclic compounds	Imidazopyrimidines	Purines and purine derivatives	152.0561 4824307.5938|302.1342 1891003.7500|71.0498 1815177.3320|70.0657 1526081.8672|98.0604 1386269.6797	1.76878e+07
1.11_284.0990m/z	Guanosine	C10H13N5O5	1.11178	284.099	284.099	96	pos	M+H	0.319319	135398635	NYHBQMYGNKIUIF-UUOKFMHZSA-N	C1=NC2=C(N1C3C(C(C(O3)CO)O)O)N=C(NC2=O)N	-1.9	Nucleosides, nucleotides, and analogues	Purine nucleosides		152.0564 293777025.0000|135.0300 24167474.1875|110.0350 5753819.0000|70.0656 1649829.7500|209.9101 1344230.8750	1.59591e+07
1.37_267.0731m/z	Inosine	C10H12N4O5	1.3682	267.073	267.073	37.6	neg	M-H	-1.40924	135398641	UGQMRVRMYYASKQ-KQYNXXCUSA-N	C1=NC2=C(C(=O)N1)N=CN2C3C(C(C(O3)CO)O)O	-1.3	Nucleosides, nucleotides, and analogues	Purine nucleosides		135.0310 2641162.3301|59.0138 2341217.9844|267.0727 1394368.9375|150.0419 1108883.7158|266.0908 724635.0469	610150
5.14_457.1355m/z	Folic acid	C19H18N7O6	5.13935	457.135	457.135	35.1	neg	M-H+H2O	2.04117	135398658	OVBPIULPVIDEAO-LBPRGKRZSA-N	C1=CC(=CC=C1C(=O)NC(CCC(=O)O)C(=O)O)NCC2=CN=C3C(=N2)C(=O)NC(=N3)N	-1.1	Organic acids and derivatives	Carboxylic acids and derivatives	Amino acids, peptides, and analogues	119.0501 16238181.9375|163.0401 9891448.6875|457.1353 8237002.8750|191.0573 519061.1563|59.0139 408086.0000	1.41173e+06
1.09_76.0168n	Oxypurinol	C5H4N4O2	1.09168	151.026	151.025	75.57	neg	[M-H]-	9.5063	135398752	HXNFUBHNUDHIGC-UHFFFAOYSA-N	C1=NNC2=C1C(=O)NC(=O)N2	-0.9	Organoheterocyclic compounds	Imidazopyrimidines	Purines and purine derivatives	151.0258 14812549.1563|108.0202 5741381.5762|59.0138 1942503.7324|71.0137 1543516.2734|101.0242 940687.9746	2.24745e+06
7.94_439.0678m/z	Purpurogallin	C11H8O5	7.93637	439.068	439.067	60.8	neg	2M-H	1.672	135403797	WDGFFVCWBZVLCE-UHFFFAOYSA-N	C1=CC2=CC(=C(C(=C2C(=O)C(=C1)O)O)O)O	2.1	Hydrocarbon derivatives	Tropones	Tropolones	439.0656 617379.4609|421.0567 445356.3281|350.0433 376979.4609|393.0619 364361.0273|324.0274 350741.3594	291187
0.99_391.0690m/z	Hematein	C16H12O6	0.99485	391.069	391.066	67.3	neg	M+HCOOH+HCOO	6.57221	135403802	HNNSUZPWERIYIL-UHFFFAOYSA-N	C1C2=CC(=C(C=C2C3=C4C=CC(=O)C(=C4OCC31O)O)O)O	-0.1	Benzenoids	Indanes		111.0086 46382928.0000|391.0686 29919073.5000|390.0716 4658355.0000|128.0354 4563117.0000|191.0559 4304228.9688	3.28779e+06
0.86_404.1050m/z	8-Hydroxyguanosine	C10H13N5O6	0.8594	404.105	404.106	38.8	neg	M+CH3COOH+HCOO	-2.93849	135407175	FPGSEBKFEJEOSA-UMMCILCDSA-N	C(C1C(C(C(O1)N2C3=C(C(=O)NC(=N3)N)NC2=O)O)O)O	-3.6	Nucleosides, nucleotides, and analogues	Purine nucleosides		191.0560 2907100.2031|61.9883 2249753.6309|85.0296 286853.1367|111.0084 189794.9336|191.0196 168776.9063	1.22433e+07
4.81_339.0728m/z	Vicine	C10H16N4O7	4.81453	339.073	339.071	36.1	neg	M+Cl	4.79337	135413566	KGNGTSCIQCLKEH-SYCVNHKBSA-N	C(C1C(C(C(C(O1)OC2=C(N=C(NC2=O)N)N)O)O)O)O	-3.7	Organic oxygen compounds	Organooxygen compounds	Carbohydrates and carbohydrate conjugates	177.0193 2695791.6250|339.0814 315572.3633|133.0296 214344.6016|123.0451 93486.4502|59.0138 74685.1172	442364
5.99_212.1508m/z	Propazine-2-hydroxy	C9H17N5O	5.98552	212.151	212.149	64.78	pos	[M+H]+	6.20985	135461611	RUOTUMSRCIMLJK-UHFFFAOYSA-N	CC(C)NC1=NC(=NC(=O)N1)NC(C)C	0.6	Organoheterocyclic compounds	Triazines	Aminotriazines	212.1507 9380985.0000|128.0569 4329178.2109|170.1036 3077683.2266|86.0354 1410143.5000|167.0614 797683.6875	463600
5.73_370.1362m/z	N2,N2-Dimethylguanosine	C12H17N5O5	5.72585	370.136	370.137	48.9	neg	M+CH3COO	-1.90166	135501639	RSPURTUNRHNVGF-IOSLPCCCSA-N	CN(C)C1=NC2=C(C(=O)N1)N=CN2C3C(C(C(O3)CO)O)O	-1.3	Nucleosides, nucleotides, and analogues	Purine nucleosides		61.9884 1046175.9375|327.0880 474367.0625|283.0984 302459.3750|307.1396 237544.3672|268.0740 211307.4531	235616
8.20_195.1028m/z	2,6,6-Trimethyl-2,4-cycloheptadien-1-one	C10H14O	8.20427	195.103	195.103	56.5	neg	M+HCOO	1.10696	136330	QNGQIURXCUHNAT-UHFFFAOYSA-N	CC1=CC=CC(CC1=O)(C)C	2.6	Lipids and lipid-like molecules	Prenol lipids	Monoterpenoids	194.0904 2851349.5000|195.1007 1286715.1250|109.0254 452783.3125|138.0325 447060.8105|108.0217 356634.2813	46591.9
9.27_235.0976m/z	Redoxcitrinin	C13H16O4	9.27152	235.098	235.098	61.88	neg	[M-H]-	-0.0960832	137628353	CBUOBMSAFIYYEJ-ZCFIWIBFSA-N	C[C@@H]1[C@H](OC=C2C1=C(C(=C(C2=O)C(=O)O)O)C)C	2.1	Lipids and lipid-like molecules	Prenol lipids	Monoterpenoids	235.0942 2111986.1719|203.0715 701847.5156|160.0167 656097.0156|65.0397 609896.5313|92.0269 474665.1504	96003.4
4.85_245.1862m/z	Isoleucylleucine	C12H24N2O3	4.85468	245.187	245.188	56.13	pos	[M+H]+	-6.26001	13817313	JWBXCSQZLLIOCI-UHFFFAOYSA-N		-1.7	Organic acids and derivatives	Carboxylic acids and derivatives	Amino acids, peptides, and analogues	86.0969 22182910.8750|69.0705 2136882.5859|245.1852 1889753.5938|131.0489 1012775.3750|132.1017 615796.6875	1.15581e+06
7.90_583.2200m/z	Schisantherin E	C30H34O9	7.89767	583.22	583.218	61.8	neg	M+HCOO	2.81174	13844274	ZNXDFTKQSCEJGE-DSASHONVSA-N	CC1CC2=CC(=C(C(=C2C3=C(C(=C(C=C3C(C1(C)O)OC(=O)C4=CC=CC=C4)OC)OC)OC)OC)OC)O	4.8	Phenylpropanoids and polyketides	Tannins	Hydrolyzable tannins	150.0303 12968.1943|165.0536 12040.4199|209.9176 4207.9736|149.0243 4072.5149|91.7105 3359.4368	179360
10.85_319.2284m/z	Alepterolic acid	C20H32O3	10.8546	319.228	319.228	78.1	neg	M-H	1.60028	13858188	LNWOKEZJIRLIDO-ZJGHDVHGSA-N	CC(=CC(=O)O)CCC1C(=C)CCC2C1(CCC(C2(C)C)O)C	4.7	Lipids and lipid-like molecules	Prenol lipids	Diterpenoids	319.2291 2373563.7813|289.2152 106940.9600|318.2168 53824.6797|71.0503 29959.0371|61.9884 27765.3574	305033
10.10_429.1915m/z	3-Isomangostin	C24H26O6	10.1009	429.191	429.191	36.4	pos	M+H2O+H	0.333939	13873655	KJCDBAVVDILRMP-UHFFFAOYSA-N	CC(=CCC1=C(C(=CC2=C1C(=O)C3=C(C4=C(C=C3O2)OC(CC4)(C)C)O)O)OC)C	5.7	Organoheterocyclic compounds	Benzopyrans	1-benzopyrans	207.1025 82451.8750|149.0601 75938.3281|91.0548 72348.4453|429.1762 69271.6484|393.1717 62686.4756	79823.8
1.49_174.0551m/z	Atrazine-desisopropyl	C5H8ClN5	1.48567	174.054	174.054	66.24	pos	[M+H]+	-2.29802	13878	IVENSCMCQBJAKW-UHFFFAOYSA-N	CCNC1=NC(=NC(=N1)N)Cl	1.1	Organoheterocyclic compounds	Triazines	Aminotriazines	70.0657 9231492.5000|60.0563 3537268.7500|174.0542 3533464.7500|116.0708 3411423.7500|130.0975 1436036.3750	276154
5.14_243.1713m/z	Isoleucylisoleucine	C12H24N2O3	5.13935	243.172	243.171	77.54	neg	[M-H]-	2.16411	13879965	BCVIOZZGJNOEQS-UHFFFAOYSA-N		-1.8	Organic acids and derivatives	Carboxylic acids and derivatives	Amino acids, peptides, and analogues	243.1713 1901773.9844|130.0874 735923.9023|243.1208 444543.9297|199.1814 411972.8320|163.0391 253030.4395	107802
2.05_451.1251m/z	Afzelechin 7-apioside	C20H22O9	2.04652	451.125	451.125	68.3	neg	M+HCOO	1.25019	13888255	BJBAEYMVZJJUEM-UHFFFAOYSA-N	C1C(C(OC2=CC(=CC(=C21)O)OC3C(C(CO3)(CO)O)O)C4=CC=C(C=C4)O)O	0.3	Phenylpropanoids and polyketides	Flavonoids	Flavans	331.0826 1029321.0625|123.0449 196284.1016|361.0928 174339.4785|289.0714 158420.2500|109.0293 140227.4688	166911
9.64_517.3170m/z	Siraitic Acid A	C29H44O5	9.63928	517.317	517.317	84	neg	M+HCOO	-0.160219	138911439	BGEBMNJNYRCNCU-RIPWTOCISA-N	CC1C(CCC2C13CCC4C2(CO3)C(=O)CC5(C4(CCC5C(C)CCC=C(C)C(=O)O)C)C)O	5.1	Lipids and lipid-like molecules	Prenol lipids	Sesquiterpenoids	517.3174 2708124.0000|455.3172 720786.6875|439.2867 330047.9102|473.3300 250249.4727|61.9884 106659.1719	643461
7.17_255.1600m/z	Grasshopper ketone	C13H20O3	7.16862	255.16	255.16	49	neg	M-H+CH3OH	1.42015	13922639	QMXLZUOHZGYGDY-JBGXHEPSSA-N	CC(=O)C=C=C1C(CC(CC1(C)O)O)(C)C	0	Lipids and lipid-like molecules	Prenol lipids	Sesquiterpenoids	255.1568 2756534.5000|59.0138 334646.8008|123.0815 233831.6563|193.1238 213042.1309|211.0416 176261.9531	1.37425e+06
1.73_380.1483m/z	L-gamma-Glutamyl-S-4-(2-hydroxybutyl)-L-cysteinyl-glycine	C14H25N3O7S	1.73083	380.149	380.148	80.36	pos	[M+H]+	2.68729	139292065	SIAVLHRKFDCBGC-AGROOBSYSA-N	CC(CCSCC(C(=O)NCC(=O)O)NC(=O)CCC(C(=O)O)N)O	-4	Organic acids and derivatives	Carboxylic acids and derivatives	Amino acids, peptides, and analogues	295.1654 1147759.8438|162.0219 757904.5781|72.0813 649516.7422|150.0914 591126.3828|234.0789 558204.3086	153936
0.93_290.0879m/z	N-Fructosyl pyroglutamate	C11H17NO8	0.93485	290.087	290.088	73.04	neg	[M-H]-	-1.89679	139292107	VMOJEEZNLOLYBG-UHFFFAOYSA-N	C1CC(=O)N(C1C(=O)O)CC2(C(C(C(O2)CO)O)O)O	-3	Organic acids and derivatives	Carboxylic acids and derivatives	Amino acids, peptides, and analogues	128.0352 24565323.0000|200.0564 8491999.3125|290.0877 2737040.1563|170.0457 1287998.7188|101.0244 642171.5781	7.10386e+06
11.43_219.1744m/z	5-hydroxyculmorin	C15H26O3	11.4272	219.174	219.174	81.82	pos	[M-2H2O+H]+	0.358986	139585563	XFKGEQRMYJCXFK-OFTJPINFSA-N	C1=CC(=C(C=C1O)O)C2=C(C(=O)C3=C(C=C(C=C3O2)O)O)O	1.8	Lipids and lipid-like molecules	Prenol lipids	Monoterpenoids	219.1755 531486.6406|131.0494 186231.2432|135.0815 116019.0898|121.0652 112003.5957|219.0797 107999.0781	216775
2.73_401.1098m/z	1-O-Feruloylglucose	C16H20O9	2.73095	401.11	401.109	73.6	neg	M+HCOO	2.41871	13962927	JWRQVQWBNRGGPK-HWKANZROSA-N	COC1=C(C=CC(=C1)C=CC(=O)OC2C(C(C(C(O2)CO)O)O)O)O	-0.3	Phenylpropanoids and polyketides	Cinnamic acids and derivatives	Hydroxycinnamic acids and derivatives	401.1082 1218938.7344|107.0500 423811.1387|177.0556 412272.6094|149.0609 284003.3770|133.0658 259535.4727	343702
6.13_373.0934m/z	3'-Hydroxy-5,7,4'-trimethoxyflavone	C18H16O6	6.12703	373.093	373.093	77.5	neg	M+HCOO	1.64549	13964545	HJYKMYKZGICPGU-UHFFFAOYSA-N	COC1=C(C=C(C=C1)C2=CC(=O)C3=C(O2)C=C(C=C3OC)OC)O	1.8	Phenylpropanoids and polyketides	Flavonoids	O-methylated flavonoids	175.0397 34525804.5000|197.0455 12663362.6250|135.0451 8125340.2617|72.9931 7321609.7656|179.0350 5655338.9375	972229
7.05_491.0984m/z	Salvianolic acid C	C26H20O10	7.04992	491.098	491.098	91.3	neg	M-H	0.0820113	13991590	GCJWPRRNLSHTRY-VURDRKPISA-N	C1=CC(=C(C=C1CC(C(=O)O)OC(=O)C=CC2=C3C=C(OC3=C(C=C2)O)C4=CC(=C(C=C4)O)O)O)O	4.1	Phenylpropanoids and polyketides	2-arylbenzofuran flavonoids		293.0447 5257329.6836|135.0452 1732467.1621|311.0562 1666703.7051|265.0503 1207393.1855|247.0386 905525.1113	1.17916e+07
9.75_305.2124m/z	15,16-Dinor-8(17),11-labdadien-13-one	C18H28O	9.75028	305.212	305.212	57.4	neg	M+HCOO	0.619394	13994560	GWLGWWOKIBLQJF-YGUYEABBSA-N	CC(=O)C=CC1C(=C)CCC2C1(CCCC2(C)C)C	5	Lipids and lipid-like molecules	Prenol lipids	Sesquiterpenoids	305.2152 11362162.0000|135.0815 1549849.1172|249.1492 812868.0234|125.0970 240001.1563|97.0660 224370.9063	482100
6.91_312.0646n	Boeravinone B	C17H12O6	6.9063	343.083	343.082	53.7	neg	M-H+CH3OH, M+HCOO, M+CH3COO	3.91302	14018348	YVVDYYFGAWQOGB-UHFFFAOYSA-N	CC1=C(C2=C(C=C1O)OC3=C(C2=O)C4=CC=CC=C4OC3O)O	2.4	Phenylpropanoids and polyketides	Isoflavonoids	Rotenoids	197.0456 6994765.3594|135.0451 6660412.4063|321.0408 6398462.8125|72.9931 5180007.8730|179.0350 3820319.0078	2.18855e+06
5.38_533.1874m/z	Syringinoside	C23H34O14	5.377	533.187	533.188	68.6	neg	M-H	-0.264084	14035430	ZCKITOSCNKNMMO-YQHZJLNZSA-N	COC1=CC(=CC(=C1OC2C(C(C(C(O2)COC3C(C(C(C(O3)CO)O)O)O)O)O)O)OC)C=CCO	-2.7	Organic oxygen compounds	Organooxygen compounds	Carbohydrates and carbohydrate conjugates	533.1872 1418864.5938|59.0137 876986.3125|71.0137 845243.1445|401.1456 789554.7188|101.0243 533196.2090	1.39417e+06
12.66_323.2234m/z	Chromomoric acid B	C18H28O3	12.6611	323.223	323.222	78.7	neg	M-H+CH3OH	3.80481	14037063	PMTMAFAPLCGXGK-TTXFDSJOSA-N	CCC=CCC1C(C=CC1=O)CCCCCCCC(=O)O	4.7	Lipids and lipid-like molecules	Fatty Acyls	Eicosanoids	323.2234 1566629.9531|291.1957 127646.3711|113.0949 16008.3105|59.0132 14872.7432|247.2060 12685.0439	141710
4.50_447.1512m/z	Icariside F2	C18H26O10	4.49817	447.151	447.151	65.5	neg	M+HCOO	1.07257	14079045	NJMQSVWMCODQIP-FQXXIRCGSA-N	C1C(C(C(O1)OCC2C(C(C(C(O2)OCC3=CC=CC=C3)O)O)O)O)(CO)O	-2.3	Organic oxygen compounds	Organooxygen compounds	Carbohydrates and carbohydrate conjugates	153.0557 2306513.2344|123.0451 1666213.1797|447.1465 281321.9648|293.0878 260208.6719|59.0139 167543.9688	278931
2.39_329.0881m/z	Phenylacetic acid + 2O, O-Hex	C14H18O9	2.38732	329.088	329.088	77.88	neg	[M-H]-	1.5065	14104236	MVFYXXNAFZRZAM-UHFFFAOYSA-N	C1=CC(=C(C=C1O)CC(=O)O)OC2C(C(C(C(O2)CO)O)O)O	-1.2	Organic oxygen compounds	Organooxygen compounds	Carbohydrates and carbohydrate conjugates	167.0349 6990562.9063|108.0216 3215539.4297|152.0114 2588202.4844|123.0451 1599857.9922|131.0351 452102.5313	1.20364e+06
4.83_417.1408m/z	Secoxyloganin methyl ester	C18H26O11	4.82588	417.141	417.14	39.1	neg	M-H	1.2588	14105070	MPCHHOVJEMEKKG-VPNMNMBESA-N	COC(=O)CC1C(C(OC=C1C(=O)OC)OC2C(C(C(C(O2)CO)O)O)O)C=C	-1.2	Lipids and lipid-like molecules	Prenol lipids	Terpene glycosides	123.0449 3984602.8281|121.0294 1557412.9688|417.1404 1187845.3906|93.0345 321431.6152|59.0138 288253.2188	689452
10.96_361.2025m/z	Dehydrohautriwaic acid	C20H26O4	10.9572	361.202	361.201	82.2	neg	M-H+CH3OH	2.86695	14108913	XLOARMGSPCGDKT-SIKIZQCASA-N	CC1CCC2(C(C1(C)CCC3=COC=C3)C=CC=C2C(=O)O)CO	4	Lipids and lipid-like molecules	Prenol lipids	Diterpenoids	361.2027 904274.2813|131.0712 64750.5000|317.2129 44464.9644|285.1860 38932.5259|161.0218 27950.6030	85800.4
8.69_498.2899m/z	Lucidenic acid A	C27H38O6	8.688	498.29	498.285	48.1	neg	M-H+CH3CN	9.47589	14109375	INIPQDKLXQHEAJ-NCQSLMINSA-N	CC(CCC(=O)O)C1CC(=O)C2(C1(CC(=O)C3=C2C(CC4C3(CCC(=O)C4(C)C)C)O)C)C	2.1	Lipids and lipid-like molecules	Prenol lipids	Triterpenoids	498.2893 2292897.3750|79.9574 294723.4453|124.0072 113271.9844|106.9809 101729.5938|61.9884 92903.6309	275327
3.88_359.0987m/z	Benzoic acid + 1O, 2MeO, O-Hex	C15H20O10	3.87532	359.098	359.097	70.88	neg	[M-H]-	2.72785	14132345	CIYLTHWUJCCASO-UHFFFAOYSA-N		-0.8	Phenylpropanoids and polyketides	Tannins	Hydrolyzable tannins	197.0456 2138752.3763|138.0323 1036213.6921|182.0221 772163.4583|123.0088 641781.4795|153.0559 385137.9329	1.53809e+06
11.31_306.2078m/z	Hydroxy-gamma-sanshool	C18H27NO2	11.3077	306.208	306.207	52.8	neg	M-H+H2O	3.03623	14135317	CRPPMKFSMRODIQ-JDXPBYPHSA-N	CC=CC=CC=CCCC=CC=CC(=O)NCC(C)(C)O	3.5	Lipids and lipid-like molecules	Fatty Acyls	Fatty amides	306.2074 4696392.0000|136.1131 1070003.9180|288.1966 919698.3750|262.2167 356520.5586|125.0973 255751.5938	281440
7.01_447.0948m/z	Chrysin-7-O-glucuronide	C21H18O10	7.00853	447.095	447.093	66.9	neg	M-H+H2O	4.78189	14135335	IDRSJGHHZXBATQ-ZFORQUDYSA-N	C1=CC=C(C=C1)C2=CC(=O)C3=C(C=C(C=C3O2)OC4C(C(C(C(O4)C(=O)O)O)O)O)O	1.5	Phenylpropanoids and polyketides	Flavonoids	Flavonoid glycosides	271.0607 1489659.8906|109.0294 1229559.5234|295.0612 1123716.7813|185.0245 1080167.9531|243.0668 467605.8242	199781
5.75_463.2188m/z	Byzantionoside B	C19H32O7	5.75357	463.219	463.218	47.1	neg	M+HCOOH+HCOO	0.965664	14135395	NYLNHNDMNOPWAZ-ZLEFDVGRSA-N	CC1=CC(=O)CC(C1CCC(C)OC2C(C(C(C(O2)CO)O)O)O)(C)C	0.3	Lipids and lipid-like molecules	Fatty Acyls	Fatty acyl glycosides	59.0137 884946.4932|463.2194 552431.1875|71.0137 545591.8369|89.0244 544807.9463|149.0455 415753.1563	295875
4.99_389.1088m/z	Secologanoside	C16H22O11	4.98915	389.109	389.109	63.5	neg	M-H	-0.224119	14136854	RGTONEMDTVVDMY-GRTPNEQMSA-N	C=CC1C(C(=COC1OC2C(C(C(C(O2)CO)O)O)O)C(=O)O)CC(=O)O	-1.9	Lipids and lipid-like molecules	Prenol lipids	Terpene glycosides	59.0138 2550780.2578|69.0346 2246227.2422|389.1080 1707729.4844|121.0658 1185783.0000|71.0139 750994.7500	418901
7.19_327.1241m/z	Cinnamyl isoferulate	C19H18O4	7.19367	327.124	327.123	48.6	neg	M-H+H2O	2.85196	14151012	CTPBHCOTQOOMTN-JPFJJCCVSA-N	COC1=C(C=C(C=C1)C=CC(=O)OCC=CC2=CC=CC=C2)O	4	Phenylpropanoids and polyketides	Cinnamic acids and derivatives	Hydroxycinnamic acids and derivatives	177.0555 5779775.0313|161.0607 5274629.1875|327.1167 4215804.0625|165.0556 1845989.0078|119.0501 1740920.4258	750244
7.31_475.0885m/z	Scutellarin methyl ester	C22H20O12	7.30797	475.088	475.088	71.1	neg	M-H	0.619033	14162695	LNIVUWPCHRNJLG-SXFAUFNYSA-N	COC(=O)C1C(C(C(C(O1)OC2=C(C(=C3C(=C2)OC(=CC3=O)C4=CC=C(C=C4)O)O)O)O)O)O	1.1	Phenylpropanoids and polyketides	Flavonoids	Flavonoid glycosides	284.0319 3210099.9688|299.0556 2219467.2813|475.0854 904998.4844|59.0138 186520.8438|113.0242 181714.4063	462592
7.08_745.1841m/z	Quercetin 3,5,3'-trimethyl ether	C36H30O14	7.07648	745.184	745.177	66.8	neg	M+CH3COO	9.88321	14162697	VGKWUQZAFRYZOU-UHFFFAOYSA-N	COC1=CC(=CC2=C1C(=O)C(=C(O2)C3=CC(=C(C=C3)O)OC)OC)O	2.6	Phenylpropanoids and polyketides	Flavonoids	O-methylated flavonoids	251.0560 2796119.0850|179.0714 2212562.0625|109.0294 1451336.2813|207.0665 1131931.3594|295.0612 1119632.2500	366351
5.64_445.0784m/z	Norwogonin-8-O-glucuronide	C21H18O11	5.64093	445.078	445.078	81.8	neg	M-H	1.70281	14180785	YFWMSXQNCPRTKO-ZUGPOPFOSA-N	C1=CC=C(C=C1)C2=CC(=O)C3=C(O2)C(=C(C=C3O)O)OC4C(C(C(C(O4)C(=O)O)O)O)O	1.1	Phenylpropanoids and polyketides	Flavonoids	Flavonoid glycosides	311.0563 1091575.0859|445.0754 968502.5313|283.0612 912709.8906|59.0139 626340.1489|61.9884 592132.8125	317999
2.62_515.1407m/z	Apiosylskimmin	C20H24O12	2.62177	515.141	515.141	80.2	neg	M+CH3COO	0.358342	14236613	SXPBJYHKMRWZNA-ZITSYKRSSA-N	C1C(C(C(O1)OCC2C(C(C(C(O2)OC3=CC4=C(C=C3)C=CC(=O)O4)O)O)O)O)(CO)O	-2	Phenylpropanoids and polyketides	Coumarins and derivatives	Coumarin glycosides	191.0561 3729190.3464|515.1379 593289.9089|353.0874 591324.3750|179.0350 413112.3564|93.0345 400921.6410	5.19523e+06
3.78_475.1462m/z	Regaloside F	C19H26O11	3.78148	475.146	475.146	65.4	neg	M+HCOO	1.21968	14284479	ZGENOXMVMATRDW-FSTLHUPISA-N	COC1=C(C=CC(=C1)C=CC(=O)OCC(COC2C(C(C(C(O2)CO)O)O)O)O)O	-1.1	Lipids and lipid-like molecules	Glycerolipids	Glycosylglycerols	167.0350 3295553.0208|152.0115 1627187.8034|108.0216 594884.7448|123.0450 314636.9014|475.1505 65370.9668	2.28691e+06
8.19_365.1982m/z	16-Hydroxy-8(17),13-labdadien-15,16-olid-19-oic acid	C20H28O5	8.19322	365.198	365.196	62.1	neg	M-H+H2O	5.31875	14287153	GZTUAPFQPZVTGA-LTWMUGOISA-N	CC12CCCC(C1CCC(=C)C2CCC3=CC(=O)OC3O)(C)C(=O)O	3.1	Lipids and lipid-like molecules	Prenol lipids	Terpene lactones	365.1974 2940972.3750|337.2018 272394.8340|321.2078 163141.0059|87.0451 115912.9609|327.2183 115524.5156	157174
7.54_269.1755m/z	Bisacurone B	C15H24O3	7.5412	269.176	269.175	74.2	neg	M-H+H2O	1.08266	14287400	QJOWFYQIUZMPRY-MXYBEHONSA-N	CC(CC(=O)C=C(C)C)C1CC(C(C=C1)(C)O)O	1.9	Lipids and lipid-like molecules	Prenol lipids	Sesquiterpenoids	269.1763 14797335.8750|181.1234 2928406.0781|87.0452 2254682.0078|209.1551 641773.3125|225.1482 461436.3438	1.12539e+06
8.04_635.1668m/z	Kaempferol 3-O-(6''-O-acetyl)glucoside-7-O-rhamnoside	C29H32O16	8.04163	635.167	635.162	45.3	neg	M-H	7.96362	14353454	GMYLPJSOUAYAGD-UHFFFAOYSA-N	CC1C(C(C(C(O1)OC2=CC(=C3C(=C2)OC(=C(C3=O)OC4C(C(C(C(O4)COC(=O)C)O)O)O)C5=CC=C(C=C5)O)O)O)O)O	-0.6				329.0666 466847.6523|313.0353 463710.1191|491.1187 296269.7383|328.0589 235823.4219|533.1309 113154.9336	249967
9.50_277.1444m/z	Atractylenolide II	C15H20O2	9.50273	277.144	277.145	81.4	neg	M+HCOO	-0.464663	14448070	OQYBLUDOOFOBPO-KCQAQPDRSA-N	CC1=C2CC3C(=C)CCCC3(CC2OC1=O)C	2.9	Lipids and lipid-like molecules	Prenol lipids	Terpene lactones	233.1555 500293.6406|215.1443 109558.1445|277.1414 79799.1250|127.1125 66408.2285|204.1137 36005.5000	167399
4.83_233.1031m/z	Cyclocerberidol	C9H16O4	4.82588	233.103	233.103	42.8	neg	M+HCOO	0.25727	14466834	ZTVGFVPGILCAPR-UHFFFAOYSA-N	C1CC2(C(C1CO2)(CO)O)CCO	-1.3	Organoheterocyclic compounds	Oxanes		233.1033 603406.4531|59.0138 355035.5977|173.0796 327613.0781|171.1028 173217.3184|173.0447 149936.8594	103569
4.63_445.1359m/z	Regaloside H	C18H24O10	4.62785	445.136	445.135	54.1	neg	M+HCOO	1.89978	14542288	WYSRAMKKFNDRPR-BFQBLSCMSA-N	C1=CC(=CC=C1C=CC(=O)OC(CO)COC2C(C(C(C(O2)CO)O)O)O)O	-1.1	Lipids and lipid-like molecules	Glycerolipids	Glycosylglycerols	107.0502 880705.5508|445.1332 835756.9531|71.0138 745757.3516|401.1460 564281.5234|161.0455 560675.4414	779771
7.81_563.1220m/z	Theaflavin	C29H24O12	7.81347	563.122	563.12	63.9	neg	M-H	4.50896	145453464	MKTFRRIBCBTOKJ-CRFHJIRQSA-N	C1C(C(OC2=CC(=CC(=C21)O)O)C3=CC4=CC(=C(C(=C4C(=O)C(=C3)O)O)O)C5C(CC6=C(C=C(C=C6O5)O)O)O)O	2.4	Phenylpropanoids and polyketides	Flavonoids	Flavans	365.0596 70495.5547|314.0042 41661.8047|153.0707 37980.8633	1.97582e+06
9.02_397.0935m/z	Parvisoflavone B	C20H16O6	9.01625	397.093	397.093	51.3	neg	M+HCOO	1.67694	14550385	YKYNYMQDXOWMDT-UHFFFAOYSA-N	CC1(C=CC2=C(O1)C=C3C(=C2O)C(=O)C(=CO3)C4=C(C=C(C=C4)O)O)C	3.6	Phenylpropanoids and polyketides	Isoflavonoids	Isoflavans	219.0663 1538501.7188|397.0876 199841.6133|135.0452 185667.8408|179.0351 168782.8389|133.0294 165737.8906	128048
9.12_373.1280m/z	Sinensetin	C20H20O7	9.1214	373.128	373.128	86.5	pos	M+H	-0.611331	145659	LKMNXYDUQXAUCZ-UHFFFAOYSA-N	COC1=C(C=C(C=C1)C2=CC(=O)C3=C(C(=C(C=C3O2)OC)OC)OC)OC	3	Phenylpropanoids and polyketides	Flavonoids	O-methylated flavonoids	373.1279 35094507.9570|343.0810 11930208.4688|312.0992 6893993.2266|329.1021 4504812.0806|357.0962 3624043.7344	9.28318e+06
0.73_133.0972m/z	2-Pyrrolidinecarboxylic acid	C5H9NO2	0.727367	133.097	133.097	62.9	pos	M+NH4	0.73756	145742	ONIBWKKTOPOVIA-BYPYZUCNSA-N	C1CC(NC1)C(=O)O	-2.5	Organic acids and derivatives	Carboxylic acids and derivatives	Amino acids, peptides, and analogues	70.0657 2225328.7500|116.0704 569656.2500|124.0240 404949.5000|82.9980 386520.4688|82.0145 296888.6563	86266.7
9.51_369.1333m/z	Anhydroicaritin	C21H20O6	9.51383	369.133	369.133	92.9	pos	M+H	0.132114	14583584	PPCHTBBOSVKORE-UHFFFAOYSA-N	CC1(CCC2=C(O1)C=C(C3=C2OC(=C(C3=O)O)C4=CC=C(C=C4)OC)O)C	4.2	Phenylpropanoids and polyketides	Flavonoids	Flavones	313.0703 5316806.1250|369.1306 3899152.0625|144.0807 574774.3281|135.0438 466537.6973|187.0751 357701.6543	436027
1.07_269.0874m/z	D-altrofurano-heptulose-3	C7H14O7	1.07118	269.087	269.088	72.6	neg	M+CH3COO	-1.75328	145865405	NSQDEHXIGIPNHO-GKHCUFPYSA-N	C(C1C(C(C(O1)(C(CO)O)O)O)O)O	-2.4				89.0243 10953709.1250|59.0138 1267473.2656|71.0137 609556.5000|179.0578 268761.6875|110.0248 211577.6563	1.24892e+06
5.77_269.0815m/z	3-Methoxyflavone	C16H12O3	5.7656	269.082	269.081	74.9	neg	M-H+H2O	0.779781	146013	ZAIANDVQAMEDFL-UHFFFAOYSA-N	COC1=C(OC2=CC=CC=C2C1=O)C3=CC=CC=C3	3.7	Phenylpropanoids and polyketides	Flavonoids	O-methylated flavonoids	109.0294 15261169.0000|269.0818 7927943.6250|159.0451 3773506.2500|254.0577 690892.0547|135.0453 534390.3750	721333
8.35_413.1247m/z	Gancaonin L	C20H18O6	8.35265	413.125	413.124	61.1	neg	M+CH3COO	1.50321	14604077	WSOHPJFMARQRFD-UHFFFAOYSA-N	CC(=CCC1=C2C(=C(C=C1O)O)C(=O)C(=CO2)C3=CC(=C(C=C3)O)O)C	4.2	Phenylpropanoids and polyketides	Isoflavonoids	Isoflav-2-enes	413.1209 786150.4609|134.0373 588651.5859|119.0503 390190.8066|163.0401 369679.0527|193.0507 359311.2539	87802
8.44_355.1191m/z	Methyl tanshinonate	C20H18O5	8.43515	355.119	355.118	42.7	neg	M-H+H2O	2.91007	14610613	YFDKIHAZVQFLRC-FQEVSTJZSA-N	CC1=COC2=C1C(=O)C(=O)C3=C2C=CC4=C3CCCC4(C)C(=O)OC	3.2	Lipids and lipid-like molecules	Prenol lipids	Diterpenoids	311.1270 682115.4453|296.1055 525893.8867|281.0820 366127.3750|135.0451 241015.2656|109.0294 164497.0947	212178
6.67_797.2251m/z	Tricoloroside	C33H46O20	6.67235	797.225	797.228	36	neg	M+Cl	-3.37426	146115850	DUSIPWCFQJSAEJ-RIJLFCCLSA-N	CC1C(CC2C1C(OC=C2C(=O)O)OC3C(C(C(C(O3)CO)O)O)O)OC(=O)CC4C(C(OC=C4C(=O)OC)OC5C(C(C(C(O5)CO)O)O)O)C=C	-2.5	Lipids and lipid-like molecules	Prenol lipids	Terpene glycosides	329.0667 7152754.4375|313.0354 4754897.6250|491.1195 2737565.4063|328.0591 2340028.7500|533.1293 1280484.1094	1.5715e+06
4.85_377.1465m/z	Brachystemidine F	C15H19N3O6	4.85163	377.147	377.146	46.3	neg	M-H+CH3CN	1.3635	146116227	JYNALUKELHWIEI-UHFFFAOYSA-N	C1C=C(C(O1)NC(=O)CCC(C(=O)O)N)COC(=O)C2=CC=CN2	-3.5	Organic acids and derivatives	Carboxylic acids and derivatives	Amino acids, peptides, and analogues	377.1507 1006833.8594|215.0924 284888.9688|59.0137 236009.7969|61.9883 199714.5313|71.0136 110324.0859	123769
6.95_243.1237m/z	Lonfuranacid A	C12H20O5	6.9461	243.124	243.124	88.7	neg	M-H	-0.259073	146116229	VJTMWYOARXNAKD-NXEZZACHSA-N	C1C(C(OC1=O)CCCCCCCC(=O)O)O	1.5	Lipids and lipid-like molecules	Fatty Acyls	Fatty acids and conjugates	225.1134 5018166.3438|243.1235 4533331.7813|183.1028 1888689.6094|181.1236 1808906.6563|207.1031 1575288.6094	1.42102e+06
6.03_577.1591m/z	Curcucomoside D	C27H30O14	6.02843	577.159	577.156	79.2	neg	M-H	4.81334	146116234	CXHUPWPOQYWQCP-JKCFQFSKSA-N	CC1C(C(C(C(O1)OC2C(C(COC2OC3=C(OC4=CC(=CC(=C4C3=O)O)OC)C5=CC=C(C=C5)O)O)O)O)O)O	0	Phenylpropanoids and polyketides	Flavonoids	Flavonoid glycosides	311.0566 292270.2227|577.1526 257730.3789|353.0673 136851.3262|309.0398 108706.6680|415.1029 104291.7539	463735
8.03_255.1600m/z	1,2-Dinor-3-oxo-6,10-farnesadien-14-oic acid	C13H20O3	8.02592	255.16	255.16	36	neg	M-H+CH3OH	1.68576	146116236	QJLQJNOTGYJCQZ-XFXZXTDPSA-N	CC(=CCCC(=CCCC(=O)C)C(=O)O)C	2.4	Lipids and lipid-like molecules	Fatty Acyls	Fatty acids and conjugates	255.1559 1880268.9375|59.0139 296648.2363|83.0503 220284.0781|193.1592 193569.8594|123.0814 127963.1016	479101
7.41_461.1079m/z	Oroxylin A-7-O-Beta-D-glucuronide	C22H20O11	7.41177	461.108	461.108	98.7	pos	M+H	0.0303648	14655551	QXIPXNZUEQYPLZ-UHFFFAOYSA-N	COC1=C(C=C2C(=C1O)C(=O)C=C(O2)C3=CC=CC=C3)OC4C(C(C(C(O4)C(=O)O)O)O)O	1.4	Phenylpropanoids and polyketides	Flavonoids	Flavonoid glycosides	285.0751 42822390.0000|270.0518 24781888.2500|461.1059 515970.0625|252.0417 451880.9414|242.0573 292620.2813	7.38448e+06
6.13_261.1130m/z	2-Hydroxyplatyphyllide	C14H14O3	6.12703	261.113	261.113	69.1	neg	M-H+CH3OH	1.35629	14681768	BUSWPFRBQXQTLO-ZWNOBZJWSA-N	CC(=C)C1CCC2=C3C1OC(=O)C3=CC(=C2)O	2.9	Organoheterocyclic compounds	Benzofurans	Benzofuranones	261.1125 7218131.0625|199.1124 3675526.0625|217.1230 3340765.8125|144.0451 100969.0313|183.0820 85944.5469	657138
6.67_464.1318n	Hesperetin 7-O-glucoside	C22H24O11	6.67235	463.125	463.125	61.7	neg	M-H, M+Cl	-0.133064	147394	ADSYMQORONDIDD-ZJHVPRRPSA-N	COC1=C(C=C(C=C1)C2CC(=O)C3=C(C=C(C=C3O2)OC4C(C(C(C(O4)CO)O)O)O)O)O	0.6	Phenylpropanoids and polyketides	Flavonoids	Flavonoid glycosides	301.0721 1135275.1250|151.0036 257515.0332|134.0372 169101.6094|149.0606 100388.1611|61.9883 89810.5391	1.32214e+06
8.92_397.2601m/z	5-(2-Acetoxy-12-hydroxytridecyl)-1,3-benzenediol	C21H34O5	8.92305	397.26	397.259	43.3	neg	M-H+CH3OH	3.01027	14779700	XPDBYTRMUWQPTF-UHFFFAOYSA-N	CC(CCCCCCCCCC(CC1=CC(=CC(=C1)O)O)OC(=O)C)O	5.3	Lipids and lipid-like molecules	Fatty Acyls	Fatty alcohols	251.1646 447337.9219|311.1856 416497.1133|249.1853 262713.1133|96.9599 223952.2656|59.0137 220420.8750	119496
2.14_401.1097m/z	Caffeic acid 4-O-glucoside	C15H18O9	2.13797	401.11	401.109	57.6	neg	M+CH3COO	2.4443	14825516	OHEYCHKLBCPRLZ-VHCZEJTMSA-N	C1=CC(=C(C=C1C=CC(=O)O)O)OC2C(C(C(C(O2)CO)O)O)O	-1.4	Organic oxygen compounds	Organooxygen compounds	Carbohydrates and carbohydrate conjugates	401.1092 517137.5469|295.0825 260362.6621|265.0715 243169.3418|87.0089 232348.7290|163.0403 130149.1094	337209
10.81_261.1494m/z	Isocuparenal	C15H20O	10.807	261.149	261.15	48.1	neg	M+HCOO	-0.809087	14830705	KJYANGWERYBSJY-HNNXBMFYSA-N	CC1(CCCC1(C)C2=CC=C(C=C2)C=O)C	4.6	Lipids and lipid-like molecules	Prenol lipids	Sesquiterpenoids	150.0321 1190476.5313|217.1608 631990.5000|174.1050 320754.1875|261.1022 217014.0391|217.1206 85704.5703	143711
5.68_297.1346m/z	1alpha,4beta,10beta-Trihydroxyguaia-2,11(13)-dien-12,6alpha-olide	C15H20O5	5.67952	297.135	297.134	59	neg	M-H+H2O	2.87185	14845605	SGHTVVJDLWGFLU-XAUBGQFWSA-N	CC1(CCC2C(C3C1(C=CC3(C)O)O)OC(=O)C2=C)O	-0.1	Lipids and lipid-like molecules	Prenol lipids	Terpene lactones	297.1403 570127.2734|110.0245 101570.1509|136.0395 93437.6094|59.0138 68351.7813|78.9592 55385.0938	690827
7.79_315.0872m/z	Isooxoflaccidin	C16H12O5	7.78698	315.087	315.087	50.7	neg	M-H+CH3OH	1.03569	14890492	BGZXWSDKPBSMNY-UHFFFAOYSA-N	COC1=C(C=C2CCC3=C4C2=C1C(=O)OC4=CC(=C3)O)O	2.6	Benzenoids	Phenanthrenes and derivatives		315.0824 591507.9063|299.0566 438807.2559|96.9601 216383.3906|59.0138 215797.8047|300.0541 211826.1094	195178
5.39_194.0461m/z	(2,4-Dihydroxyphenyl)acetonitrile	C8H7NO2	5.38855	194.046	194.046	35.4	neg	M+HCOO	1.36732	14970422	SSUJMKQLZZYAFW-UHFFFAOYSA-N	C1=CC(=C(C=C1O)O)CC#N	0.9	Benzenoids	Benzene and substituted derivatives	Benzyl cyanides	136.0166 3113455.5000|149.0580 2489041.1250|134.0373 1361709.0469|161.0456 1112191.7891|149.0220 782572.2656	120001
1.34_239.0674m/z	Dinoterb	C10H12N2O5	1.33615	239.067	239.067	53.66	neg	[M-H]-	0.896422	14994	IIPZYDQGBIWLBU-UHFFFAOYSA-N	CC(C)(C)C1=C(C(=CC(=C1)[N+](=O)[O-])[N+](=O)[O-])O	3.4	Benzenoids	Phenols	Nitrophenols	124.0404 13403772.3125|94.0299 5346023.2031|59.0139 2573742.6133|239.0667 1344248.3750|114.0198 1220516.2500	704089
7.62_197.0809m/z	2',4',5'-Trihydroxybutyrophenone	C10H12O4	7.62357	197.081	197.081	78.09	pos	[M+H]+	0.458848	15008	SRUQARLMFOLRDN-UHFFFAOYSA-N	CCCC(=O)C1=CC(=C(C=C1O)O)O	1.9	Organic oxygen compounds	Organooxygen compounds	Carbonyl compounds	197.0804 757061.7422|155.9742 660905.8281|169.0847 658068.5000|138.0678 623793.6250|154.0618 488659.0938	65119.2
0.99_243.0622m/z	Pseudouridine	C9H12N2O6	0.99485	243.062	243.062	80.2	neg	[M-H]-	-0.372789	15047	PTJWIQPHWPFNBW-GBNDHIKLSA-N	C1=C(C(=O)NC(=O)N1)C2C(C(C(O2)CO)O)O	-2.8	Nucleosides, nucleotides, and analogues	Nucleoside and nucleotide analogues		61.9883 6683317.5000|243.0617 3872570.2813|153.0305 3279064.8281|127.0512 3190331.8906|128.0352 2944580.9844	784666
1.17_154.0147m/z	1H-Pyrrole-2,3-dicarboxylic acid	C6H5NO4	1.16667	154.015	154.015	43.3	neg	M-H	0.768778	150884	OEUSNWDYXDEXDR-UHFFFAOYSA-N	C1=CNC(=C1C(=O)O)C(=O)O	0.1	Organoheterocyclic compounds	Pyrroles	Pyrrole carboxylic acids and derivatives	110.0246 39539092.9336|82.0297 1989131.5762|154.0143 1815386.6445|111.0441 1611650.4336|111.0072 889838.4512	955302
1.20_258.1086m/z	2'-O-Methylcytidine	C10H15N3O5	1.19667	258.108	258.111	97.3	pos	[M+H]+	-9.162	150971	RFCQJGFZUQFYRF-ZOQUXTDFSA-N	COC1C(C(OC1N2C=CC(=NC2=O)N)CO)O	-1.6	Nucleosides, nucleotides, and analogues	Pyrimidine nucleosides		212.1284 1753683.3438|97.0288 1631131.6875|112.0397 1102554.2109|112.0520 1029426.6250|143.0578 968010.7031	469190
6.34_183.0653m/z	2,6-Dimethoxybenzoic acid	C9H10O4	6.33598	183.065	183.065	58.44	pos	[M+H]+	0.635027	15109	MBIZFBDREVRUHY-UHFFFAOYSA-N	COC1=C(C(=CC=C1)OC)C(=O)O	0.7	Benzenoids	Benzene and substituted derivatives	Benzoic acids and derivatives	123.0442 7381288.2500|95.0495 6391839.8906|77.0391 3238308.2578|155.0699 2721686.1094|140.0467 2683786.4375	1.25333e+06
4.71_189.0771m/z	trans-4-Hydroxycyclohexanecarboxylic Acid	C7H12O3	4.70807	189.077	189.077	65.1	neg	M+HCOO	1.49409	151138	HCFRWBBJISAZNK-UHFFFAOYSA-N	C1CC(CCC1C(=O)O)O	0.3	Organic oxygen compounds	Organooxygen compounds	Alcohols and polyols	189.0768 3551046.0000|144.0456 1263439.1563|127.0763 1138536.3750|143.0712 1113553.2031|171.0661 355622.6250	318176
6.32_279.1236m/z	Altamisic acid	C15H20O5	6.32447	279.124	279.124	64.6	neg	M-H	-0.713997	15143694	PPUVIGSDWLRHCY-PSOPSSQASA-N	CC1=C(C(C2C(CC1)C(=C)C(=O)O2)(C)O)CCC(=O)O	0.4	Lipids and lipid-like molecules	Prenol lipids	Terpene lactones	279.1267 777433.5625|141.0557 213691.7656|217.1240 181951.8223|279.0392 177207.1563|235.1376 161141.1914	211326
6.18_269.0816m/z	3'-O-Methylgnetifolin M	C16H14O4	6.17882	269.082	269.082	41	neg	M-H	-1.37886	151942516	TUYXRUAZDBKMGE-UHFFFAOYSA-N	COC1=CC(=CC(=C1)C2=CC3=C(C=CC=C3O2)O)OC	3.6				135.0450 2320360.9063|109.0293 2303515.4688|269.0828 1533928.3906|197.0452 785066.5938|72.9930 539215.4395	89127.8
11.52_397.2029m/z	Bipolal	C24H30O5	11.5152	397.203	397.202	60.9	neg	M-H	2.07293	15200476	GIUVFWDLNFDKHT-PKSNHMFESA-N	CCC(C)C=CC=CC(=O)OC1C=CC2=CC(=O)C(CC2(C1C)C)(C(=C)C=O)O	4.5	Lipids and lipid-like molecules	Prenol lipids	Sesquiterpenoids	189.0922 627361.1406|207.1028 271905.2480|163.1129 195954.3447|397.1977 180358.6270|187.0766 109771.1465	148356
7.41_459.0937m/z	Baicalin methyl ester	C22H20O11	7.41165	459.094	459.093	71.4	neg	M-H	0.83058	15223582	AOWRAYJMTOYETH-SXFAUFNYSA-N	COC(=O)C1C(C(C(C(O1)OC2=C(C(=C3C(=C2)OC(=CC3=O)C4=CC=CC=C4)O)O)O)O)O	1.4	Phenylpropanoids and polyketides	Flavonoids	Flavonoid glycosides	268.0375 5786522.8750|283.0612 4197636.9688|113.0244 1967344.2617|85.0296 1175151.3223|59.0138 742511.8135	4.50269e+06
5.96_301.1294m/z	Phomaligol A	C14H20O6	5.95673	301.129	301.129	41.3	neg	M-H+H2O	2.54474	15265874	DWJRXSZPSOQYDZ-HQOPCJQPSA-N	CCC(C)C(=O)OC1(C(=O)C=C(C(C1=O)(C)O)OC)C	1.1	Organic oxygen compounds	Organooxygen compounds	Carbonyl compounds	301.1327 710059.8125|109.0295 231468.2148|211.0975 213335.8008|59.0138 199359.5493|169.0876 148792.2383	97781.2
5.95_438.2390m/z	Dicoumaroyl Spermidine	C25H31N3O4	5.95112	438.24	438.24	76.64	pos	[M+H]+	-0.674201	15270795	QYBCBMVQSCJMSA-VOMDNODZSA-N	C1=CC(=CC=C1C=CC(=O)NCCCCNCCCNC(=O)C=CC2=CC=C(C=C2)O)O	3	Phenylpropanoids and polyketides	Cinnamic acids and derivatives	Hydroxycinnamic acids and derivatives	147.0441 1934945.9922|438.2432 1101648.5938|204.1019 942109.9453|131.0492 906569.3516|72.0813 627326.6504	159103
1.39_320.0991m/z	Steviol-19-O-Glucoside	C12H19N3O5	1.39015	320.099	320.102	39.8	neg	M+Cl	-9.75403	152758	OQPOFZJZPYRNFF-CULFPKEHSA-N	CC12CCCC(C1CCC34C2CCC(C3)(C(=C)C4)O)(C)C(=O)OC5C(C(C(C(O5)CO)O)O)O	2	Lipids and lipid-like molecules	Prenol lipids	Terpene glycosides	59.0138 1218761.1270|71.0139 660917.8750|150.0420 568777.0664|89.0245 486151.9893|282.0840 447464.7891	315490
6.79_459.0944m/z	Acacetin-7-glucuronide	C22H20O11	6.79183	459.094	459.093	88.2	neg	M-H	2.36137	15344014	ZWVNKIJIVBIMSW-SXFAUFNYSA-N	COC1=CC=C(C=C1)C2=CC(=O)C3=C(C=C(C=C3O2)OC4C(C(C(C(O4)C(=O)O)O)O)O)O	1.4	Phenylpropanoids and polyketides	Flavonoids	Flavonoid glycosides	325.0716 1245607.6406|459.0900 1006439.9531|297.0765 911194.4766|355.0821 444996.3594|295.0607 264412.9688	246003
9.42_304.2001m/z	9alpha-Hydroxymatrine	C15H24N2O2	9.42032	304.2	304.203	85.6	neg	M-H+CH3CN	-9.16143	15385684	JTWPUVIWKODBID-WHPHWUKISA-N	C1CC2C3CC(CN4C3C(CCC4)CN2C(=O)C1)O	0.6	Alkaloids and derivatives	Lupin alkaloids	Matrine alkaloids	303.1965 11106852.5000|259.2065 3012784.6016|261.1492 241461.0938|135.0811 57264.9453|59.0137 55656.1797	203567
8.17_235.1693m/z	Walleminone	C15H24O3	8.1743	235.169	235.169	85.27	pos	[M-H2O+H]+	0.296675	15431312	NGQXJSTYWWTPOG-VGYDOTAVSA-N		1.6	Lipids and lipid-like molecules	Prenol lipids	Sesquiterpenoids	235.1701 799396.7109|235.1300 641932.3750|93.0705 521579.6032|107.0859 437027.1100|81.0704 414019.5879	1.60571e+06
8.26_247.1338m/z	Oleodaphnone	C15H18O2	8.25738	247.134	247.133	66.7	neg	M-H+H2O	1.96799	15478917	UYMHDKPGFDYSRZ-UHFFFAOYSA-N	CC1=C2CC(CC(=O)C(=C2CC1=O)C)C(=C)C	1.9	Lipids and lipid-like molecules	Prenol lipids	Sesquiterpenoids	247.1334 17537549.5000|203.1438 2670519.0625|71.0500 2371351.8984|246.1218 550681.6875|97.0653 408499.8438	1.60176e+06
5.98_343.1167m/z	2',4'-Dihydroxy-3,7':4,8'-diepoxylign-7-ene	C18H18O4	5.98358	343.117	343.119	45.2	neg	M+HCOO	-6.70385	154790638	ZSFCGNNMMPZMQV-ONEGZZNKSA-N	CC=CC1=CC2=C(C=C1)OC(C(O2)C3=C(C=C(C=C3)O)O)C	3.9	Organoheterocyclic compounds	Benzodioxanes	Phenylbenzodioxanes	61.9884 356576.0000|135.0450 311721.8945|59.0138 282195.4775|299.0967 210712.8594|343.1142 178693.2813	81417.5
8.96_293.1182m/z	Dehydroacerogenin C	C19H18O3	8.96098	293.118	293.118	84.6	neg	M-H	-0.515577	154790969	XYHMPDDSCDAZOB-RQOWECAXSA-N	C1CC2=CC(=C(C=C2)O)OC3=CC=C(CCC(=O)C=C1)C=C3	3.9				187.0763 20488552.5000|293.1172 11956794.3750|119.0501 8439962.0000|93.0348 1270185.3750|145.0662 995491.5000	1.86015e+06
6.82_643.1933m/z	10-O-[(E)-3,4-Dimethoxycinnamoyl]-catalpol	C26H32O13	6.81577	643.193	643.187	66.4	neg	M+HCOOH+HCOO	9.58157	154831796	QHXDBFPOFIGMFJ-KPSINTOKSA-N	COC1=C(C=C(C=C1)C=CC(=O)OCC23C4C(C=COC4OC5C(C(C(C(O5)CO)O)O)O)C(C2O3)O)OC	-0.6				175.0398 3631033.7813|160.0164 2853800.0625|132.0215 762167.7109|193.0504 341723.8379|59.0137 252483.3438	497373
9.27_324.2169m/z	Capsaicin	C18H27NO3	9.26672	324.217	324.218	39.7	pos	M+H2O+H	-2.05232	1548943	YKPUWZUDDOIDPM-SOFGYWHQSA-N	CC(C)C=CCCCCC(=O)NCC1=CC(=C(C=C1)O)OC	3.6	Benzenoids	Phenols	Methoxyphenols	208.1332 476356.2891|324.2160 249185.5781|306.2068 170731.4219|81.0705 154305.8281|226.1446 149743.1211	234061
5.75_225.0768m/z	(E)-4-(3-Hydroxyprop-1-en-1-yl)-2-methoxyphenol	C10H12O3	5.75357	225.077	225.077	42.1	neg	M+HCOO	-0.340277	1549095	JMFRWRFFLBVWSI-NSCUHMNNSA-N	COC1=C(C=CC(=C1)C=CCO)O	1.4	Benzenoids	Phenols	Methoxyphenols	59.0137 1128125.5840|75.0086 623617.3750|149.0607 507344.9688|225.0778 499440.3730|167.0349 387330.6875	244475
6.63_197.0457m/z	Caffeic acid	C9H8O4	6.63082	197.046	197.045	85.8	neg	M-H+H2O	3.8586	1549111	QAIPRVGONGVQAS-RQOWECAXSA-N	C1=CC(=C(C=C1C=CC(=O)O)O)O	1.2	Phenylpropanoids and polyketides	Cinnamic acids and derivatives	Hydroxycinnamic acids and derivatives	135.0450 6578075.5103|72.9930 6318832.3237|123.0450 4740496.9219|179.0348 4633260.0234|197.0458 2125474.4766	4.07299e+06
8.14_385.1300m/z	6-Prenylnaringenin	C20H20O5	8.13955	385.13	385.129	74.5	neg	M+HCOO	2.0993	155094	YHWNASRGLKJRJJ-KRWDZBQOSA-N	CC(=CCC1=C(C2=C(C=C1O)OC(CC2=O)C3=CC=C(C=C3)O)O)C	4.3	Phenylpropanoids and polyketides	Flavonoids	Flavans	385.1311 786811.7500|341.1430 360115.7695|326.1186 330993.6758|256.0370 249944.4199|109.0294 152432.7485	390866
12.65_417.2275m/z	Schisandrin A	C24H32O6	12.6532	417.228	417.227	88	pos	M+H	0.838816	155256	JEJFTTRHGBKKEI-OKILXGFUSA-N	CC1CC2=CC(=C(C(=C2C3=C(C(=C(C=C3CC1C)OC)OC)OC)OC)OC)OC	5.3	Phenylpropanoids and polyketides	Tannins	Hydrolyzable tannins	417.2224 427084.7969|316.1305 253154.0781|301.1074 153119.9805|285.1138 92983.8018|347.1489 90926.0459	67696.5
6.67_373.0569m/z	Aflatoxin M1	C17H12O7	6.67235	373.057	373.056	66	neg	M+HCOO	1.15061	15558498	MJBWDEQAUQTVKK-IAGOWNOFSA-N	COC1=C2C3=C(C(=O)CC3)C(=O)OC2=C4C(=C1)OC5C4(C=CO5)O	0.5	Phenylpropanoids and polyketides	Coumarins and derivatives	Furanocoumarins	373.0539 521469.7656|311.0563 511737.7266|301.0721 329598.8984|175.0402 177994.6436|151.0015 166902.5410	132905
7.31_363.0724m/z	Pterocarpadiol C	C16H14O7	7.30797	363.072	363.072	73.9	neg	M+HCOO	0.767157	155885967	UQXCWJTUYMGOHA-UHFFFAOYSA-N	C1CC2(C3C(COC2=CC1=O)(C4=CC5=C(C=C4O3)OCO5)O)O	-0.6	Organoheterocyclic compounds	Benzodioxoles		319.0844 623560.3203|245.0455 517250.5547|363.0670 344101.4844|231.0298 267829.4375|219.0299 225655.1758	76474.3
10.17_291.1237m/z	O-Methylcedrelopsin	C16H18O4	10.1676	291.124	291.123	44.9	neg	M-H+H2O	1.65234	155937	NNBURDJZOIAAHY-UHFFFAOYSA-N	CC(=CCC1=C2C(=CC(=C1OC)OC)C=CC(=O)O2)C	3.8	Phenylpropanoids and polyketides	Coumarins and derivatives		247.1329 1446427.4531|291.1229 514939.1484|177.0921 409853.8945|290.1760 86324.0703|162.0685 82536.2031	83700.1
7.74_671.1448m/z	Adonivernithol	C26H28O15	7.74452	671.145	671.147	60.1	neg	M+HCOOH+HCOO	-2.99776	15596598	RQLWDYSEFWBFBP-HFSMFUKASA-N	C1C(C(C(C(O1)OC2C(C(C(OC2C3=C(C=C(C4=C3OC(=CC4=O)C5=CC(=C(C=C5)O)O)O)O)CO)O)O)O)O)O	-1.7	Phenylpropanoids and polyketides	Flavonoids	Flavonoid glycosides	321.0403 2248302.7871|473.0876 1980239.7188|339.0510 1416658.6230|185.0243 1026974.7715|109.0293 933794.7852	1.20667e+07
5.77_595.1667m/z	4'-O-Glucosylvitexin	C27H30O15	5.7669	595.167	595.166	46.3	pos	M+H	1.68394	15596617	CQJPSSJEHVNDFL-WIQAIWCDSA-N	C1=CC(=CC=C1C2=CC(=O)C3=C(O2)C(=C(C=C3O)O)C4C(C(C(C(O4)CO)O)O)O)OC5C(C(C(C(O5)CO)O)O)O	-1.6	Phenylpropanoids and polyketides	Flavonoids	Flavonoid glycosides	70.0658 33402.5664|86.0966 26324.1133|131.0493 18440.8281|72.0813 17868.1992|209.9075 15973.4346	157697
5.47_564.2339m/z	Stachybotrin E	C29H39NO8	5.46575	564.234	564.237	54.8	neg	M+Cl	-5.72096	155978886	KWODKFGSLAULOG-JBIKXYLQSA-N	CC1CCC2C(C(CCC2(C13CC4=C(C=C5C(=C4O3)CN(C5=O)C(CCC(=O)OC)C(=O)O)O)C)O)(C)C	3.7	Organic acids and derivatives	Carboxylic acids and derivatives	Amino acids, peptides, and analogues	564.2388 503316.0313|520.2056 423140.0625|184.0728 400412.0625|127.0514 258224.5713|191.0563 249030.9688	232822
5.36_445.2088m/z	Icariside B1	C19H30O8	5.36477	445.209	445.208	61.6	neg	M+CH3COO	2.46203	15628136	OSUSRWMGHUUXBY-YARXSPMZSA-N	CC(=O)C=C=C1C(CC(CC1(C)O)OC2C(C(C(C(O2)CO)O)O)O)(C)C	-1.6	Lipids and lipid-like molecules	Prenol lipids	Terpene glycosides	59.0138 2489004.6680|89.0245 499346.0703|71.0138 445233.5928|179.0568 377115.2305|101.0244 224390.3125	948965
5.41_421.1726m/z	Villosolside	C16H26O9	5.41458	421.173	421.171	79.4	neg	M+CH3COO	3.00817	156599111	DBLVGADGVDUSHJ-RLIMOHGTSA-N	CC1C2CC(C(C2COC1=O)(C)OC3C(C(C(C(O3)CO)O)O)O)O	-1.6	Lipids and lipid-like molecules	Prenol lipids	Terpene lactones	57.0346 2611082.8984|59.0139 2606283.7500|99.0452 2204526.8828|277.1292 1384073.2344|125.0244 1020767.4766	822808
5.49_415.1617m/z	3,5,7-Trihydroxy-p-menth-1-en-6-one, 5-Tigloyl, 3	C17H24O6	5.48815	415.162	415.161	49.4	neg	M+HCOOH+HCOO	2.11542	15699870	NUENJLVLKHHYJS-KOPIJTNESA-N	CC=C(C)C(=O)OC1C(C(C=C(C1=O)CO)OC(=O)C)C(C)C	2.5	Lipids and lipid-like molecules	Prenol lipids	Monoterpenoids	269.1028 1083696.2578|415.1589 825302.3125|59.0138 812740.8750|71.0138 650816.4902|101.0243 614764.4355	522214
8.11_198.1263n	Undecanedioic acid	C11H20O4	8.11323	215.129	215.128	54.3	neg	[M-H]-	3.34037	15816	LWBHHRRTOZQPDM-UHFFFAOYSA-N	C(CCCCC(=O)O)CCCCC(=O)O	2.7	Lipids and lipid-like molecules	Fatty Acyls	Fatty acids and conjugates	215.1316 939161.9297|197.1183 638988.4609|153.1285 485538.9063|116.0714 143217.3594|59.0139 73224.4727	3.01465e+06
8.35_317.0657m/z	Isorhamnetin	C16H12O7	8.34962	317.066	317.066	94.3	pos	M+H	0.537699	15817847	KQBHOMRPRBEQFF-UHFFFAOYSA-N	COC1=C(C=CC(=C1)C2=C(C(=O)C3=CC(=C(C=C3O2)O)O)O)O	1.9				317.0658 10206162.2500|302.0422 1876292.1250|153.0183 1393426.6484|285.0399 766489.7734|274.0469 592616.2500	801377
4.45_469.1829m/z	Amicoumacin B	C20H28N2O8	4.44663	469.183	469.183	63.5	neg	M+HCOO	0.211565	158248	LOXFXXGTOVWWQV-UHFFFAOYSA-N	CC(C)CC(C1CC2=C(C(=CC=C2)O)C(=O)O1)NC(=O)C(C(C(CC(=O)O)N)O)O	-1.8	Organic acids and derivatives	Carboxylic acids and derivatives	Amino acids, peptides, and analogues	135.0451 1482385.7480|307.1300 734646.8066|61.9883 224691.3867|379.1518 219499.6084|59.0137 198738.5098	975071
2.17_377.1096m/z	alpha-Arbutin	C12H16O7	2.1738	377.11	377.109	46	neg	M+CH3COOH+HCOO	2.40017	158637	BJRNKVDFDLYUGJ-ZIQFBCGOSA-N	C1=CC(=CC=C1O)OC2C(C(C(C(O2)CO)O)O)O	-0.7	Organic oxygen compounds	Organooxygen compounds	Carbohydrates and carbohydrate conjugates	197.0454 1776976.8984|72.9930 655500.4375|135.0451 642008.9336|179.0347 549013.7852|59.0137 460156.4883	917482
9.48_376.1407m/z	4-Hydroxycephalotaxine	C18H21NO5	9.47603	376.141	376.14	82.2	neg	M+HCOO	1.66783	158670	MVSKPPYUIBULOR-UHFFFAOYSA-N	COC1=CC23CCCN2CCC4=CC5=C(C=C4C3(C1O)O)OCO5	0.4	Alkaloids and derivatives	Cephalotaxus alkaloids		61.9883 7585740.5000|313.1443 5527036.8125|108.0219 844383.1875|135.0453 273938.4688|78.9586 263533.3672	2.00515e+06
7.64_265.1071m/z	Salidroside	C14H20O7	7.64498	265.107	265.107	51.7	pos	M+H-2H2O	0.158607	159278	ILRCGYURZSFMEG-RKQHYHRCSA-N	C1=CC(=CC=C1CCOC2C(C(C(C(O2)CO)O)O)O)O	-0.6	Organic oxygen compounds	Organooxygen compounds	Carbohydrates and carbohydrate conjugates	205.0859 1302626.6563|173.0600 1234792.8750|145.0649 865167.9453|265.0893 792338.1953|217.0860 676789.8047	255565
11.07_504.3089m/z	Pristimerin	C30H40O4	11.072	504.309	504.312	48.7	neg	M-H+CH3CN	-5.34743	159516	JFACETXYABVHFD-WXPPGMDDSA-N	CC1=C(C(=O)C=C2C1=CC=C3C2(CCC4(C3(CCC5(C4CC(CC5)(C)C(=O)OC)C)C)C)C)O	6.3	Lipids and lipid-like molecules	Prenol lipids	Triterpenoids	279.2326 3716281.3750|504.3104 1120873.6563|78.9591 882718.4370|277.2172 380487.2188|224.0693 315304.5254	65939
6.21_361.0927m/z	Cirsiliol	C17H14O7	6.20665	361.093	361.092	45.2	neg	M-H+CH3OH	1.05635	160237	IMEYGBIXGJLUIS-UHFFFAOYSA-N	COC1=C(C(=C2C(=C1)OC(=CC2=O)C3=CC(=C(C=C3)O)O)O)OC	2.6	Phenylpropanoids and polyketides	Flavonoids	O-methylated flavonoids	135.0450 3439483.5146|179.0350 562614.5898|361.0920 555631.3203|197.0457 262900.4766|72.9932 202003.7012	104456
11.13_315.1588m/z	Cryptotanshinone	C19H20O3	11.1271	315.159	315.16	95.6	pos	M+H2O+H	-2.80345	160254	GVKKJJOMQCNPGB-JTQLQIEISA-N	CC1COC2=C1C(=O)C(=O)C3=C2C=CC4=C3CCCC4(C)C	3.8	Lipids and lipid-like molecules	Prenol lipids	Diterpenoids	297.1479 9166065.2617|315.1572 3549739.0859|279.1373 1731461.4229|254.0925 1439097.4243|251.1449 1366372.0735	2.98493e+07
5.20_229.0984m/z	Harmalan (Dihydroharman)	C12H12N2	5.20073	229.098	229.098	51.9	neg	M+HCOO	0.579504	160510	CWOYLIJQLSNRRN-UHFFFAOYSA-N	CC1=NCCC2=C1NC3=CC=CC=C23	2.1	Alkaloids and derivatives	Harmala alkaloids		229.0988 2133144.8438|116.0504 1635484.3906|100.0402 1400394.4453|185.1084 1018644.1172|142.0661 853262.6797	503623
9.23_250.0720m/z	Oxohydrastinine	C11H11NO3	9.23353	250.072	250.072	35.4	neg	M+HCOO	-0.436689	160522	WIUVXEAALLSOQN-UHFFFAOYSA-N	CN1CCC2=CC3=C(C=C2C1=O)OCO3	1.2	Organoheterocyclic compounds	Isoquinolines and derivatives	Isoquinolones and derivatives	206.0820 8868849.6250|249.1490 6590394.3750|177.0429 3844455.9219|122.0245 2952236.0000|147.0454 1079987.3750	894656
11.17_373.2027m/z	21-Deoxyneridienone B	C21H28O3	11.1731	373.203	373.202	59.9	neg	M+HCOO	2.11977	16104854	AXIMAQIOARWDAI-LYJJHTRHSA-N	CC(C1CCC2C1(C(=O)CC3C2C=CC4=CC(=O)CCC34C)C)O	2.4	Lipids and lipid-like molecules	Steroids and steroid derivatives	Pregnane steroids	373.2021 1188857.9219|280.1468 377944.9063|313.1895 298666.2188|340.1682 233303.4297|373.0379 139825.0313	191103
1.55_253.0830m/z	L-Kynurenine	C10H12N2O3	1.55435	253.083	253.083	45.6	neg	M+HCOO	-0.113349	161166	YGPSJZOEDVAXAB-QMMMGPOBSA-N	C1=CC=C(C(=C1)C(=O)CC(C(=O)O)N)N	-2.2	Organic oxygen compounds	Organooxygen compounds	Carbonyl compounds	59.0137 10664343.4063|94.0296 10221711.2813|193.0714 3340958.7656|179.0828 1862327.7500|253.0832 1491413.1250	510046
10.32_337.2387m/z	Ginkgolic acid (C13:0)	C20H32O3	10.3169	337.239	337.238	42	neg	M-H+H2O	2.59735	161306	VEPUCZUJLKAVNM-UHFFFAOYSA-N	CCCCCCCCCCCCCC1=C(C(=CC=C1)O)C(=O)O	8.4	Benzenoids	Benzene and substituted derivatives	Benzoic acids and derivatives	337.0355 784870.2109|337.2406 506261.6250|319.2304 292216.9883|202.9984 179402.8311|336.2188 132078.6719	61301.1
6.30_345.1348m/z	Agrimonolide	C18H18O5	6.29593	345.135	345.134	77.5	neg	M-H+CH3OH	3.04032	161362	TYFJTEPDESMEHE-HNNXBMFYSA-N	COC1=CC=C(C=C1)CCC2CC3=C(C(=CC(=C3)O)O)C(=O)O2	4	Benzenoids	Benzene and substituted derivatives	Benzoic acids and derivatives	150.0322 4104293.0000|327.1243 1713253.4844|151.0395 1393103.5859|120.9965 615682.8496|123.0451 454985.7520	919644
3.58_130.0865m/z	N,N-Dimethylacetoacetamide	C6H11NO2	3.58313	130.086	130.086	71.97	pos	[M+H]+	1.40028	16278	YPEWWOUWRRQBAX-UHFFFAOYSA-N		-0.4	Lipids and lipid-like molecules	Fatty Acyls	Fatty amides	103.0546 14787914.0000|84.0449 14547408.6250|84.0813 2401136.3281|130.0658 2112295.0000|77.0390 1529738.6250	18474.6
1.05_365.0732m/z	Erigeroside	C11H14O8	1.04802	365.073	365.072	61.6	neg	M+HCOOH+HCOO	2.32605	162876	QCBPBADGYXFZSW-ZHVGPZTNSA-N	C1=COC=C(C1=O)OC2C(C(C(C(O2)CO)O)O)O	-1.8	Organic oxygen compounds	Organooxygen compounds	Carbohydrates and carbohydrate conjugates	113.0243 3183106.5098|85.0295 2005351.6387|175.0247 1405031.2612|131.0348 1372655.2852|111.0086 1314171.1104	2.61745e+06
1.03_204.0878m/z	Betonicine	C7H13NO3	1.03375	204.088	204.088	45.7	neg	M+HCOO	0.538618	164642	MUNWAHDYFVYIKH-RITPCOANSA-N	C[N+]1(CC(CC1C(=O)[O-])O)C	0.1	Organic acids and derivatives	Carboxylic acids and derivatives	Amino acids, peptides, and analogues	204.0875 7770660.6250|158.0821 2558660.2500|111.0088 2401981.5547|125.0243 1623016.3125|85.0295 1335562.3750	609226
4.87_327.1096m/z	Androsin	C15H20O8	4.86515	327.11	327.109	59.9	neg	M-H	3.15436	164648	QUOZWMJFTQUXON-UXXRCYHCSA-N	CC(=O)C1=CC(=C(C=C1)OC2C(C(C(C(O2)CO)O)O)O)OC	-1.4	Organic oxygen compounds	Organooxygen compounds	Carbohydrates and carbohydrate conjugates	165.0536 1466485.7500|59.0138 312391.0313|135.0448 255678.8467|147.0459 253232.8516|327.1172 226741.4844	107817
12.82_294.1255n	Tanshinone IIA	C19H18O3	12.8196	295.133	295.133	88.9	pos	M+H, 2M+Na, M+CH3CN+Na, M+K, M+Na	-0.436335	164676	HYXITZLLTYIPOF-UHFFFAOYSA-N	CC1=COC2=C1C(=O)C(=O)C3=C2C=CC4=C3CCCC4(C)C	4.3	Lipids and lipid-like molecules	Prenol lipids	Diterpenoids	317.1139 1146440.2773|316.3157 27745.1787|256.2628 17908.6787|209.9023 16232.9854|131.0487 13310.9907	3.58484e+07
9.24_288.1230m/z	Lycorine chloride	C16H18ClNO4	9.24045	288.123	288.123	48.8	pos	M+?	-0.0512553	164943	VUVNTYCHKZBOMV-NVJKKXITSA-N	C1CN2CC3=CC4=C(C=C3C5C2C1=CC(C5O)O)OCO4.Cl	0	Alkaloids and derivatives	Amaryllidaceae alkaloids	Lycorine-type amaryllidaceae alkaloids	270.1119 702833.2500|288.1208 614538.8750|187.0737 266851.0938|88.0761 219839.4727|95.0859 217658.4414	46819.1
10.11_288.1605m/z	HHQ	C16H21NO	10.1112	288.16	288.161	53.1	neg	M+HCOO	-0.0721201	164974	UYRHHBXYXSYGHA-UHFFFAOYSA-N	CCCCCCCC1=CC(=O)C2=CC=CC=C2N1	4.9	Organoheterocyclic compounds	Quinolines and derivatives	Quinolones and derivatives	288.1604 1055655.8125|242.1552 538174.4883|244.1704 310479.4531|185.1334 219097.7783|74.0247 186185.6221	690598
11.59_263.1651m/z	Aristolone	C15H22O	11.5917	263.165	263.165	76.3	neg	M+HCOO	-0.713434	165536	UGVIZCBJCSXBCJ-JWFUOXDNSA-N	CC1CCCC2=CC(=O)C3C(C12C)C3(C)C	3.6	Lipids and lipid-like molecules	Prenol lipids	Sesquiterpenoids	219.1755 859316.7188|217.1595 160311.3047|263.1716 95845.9229|163.1131 44684.6797|59.0138 29426.3438	61386.5
5.21_431.1567m/z	13-O-Ethylpiptocarphol	C17H24O7	5.21247	431.157	431.156	35.6	neg	M+HCOOH+HCOO	2.31398	167995126	NQJAGJJBDQOCPP-XYOKQWHBSA-N	CCOCC1=C/2[C@H](C[C@@]([C@@]3(CC[C@@](O3)(/C=C2/OC1=O)C)O)(C)O)O	-1.1				431.1571 1472364.4531|195.0663 1161746.4688|59.0138 819711.3125|136.0529 358222.9102|135.0452 163670.4375	341666
8.33_309.1132m/z	Giffonin R	C19H16O3	8.3255	309.113	309.113	41.1	neg	M-H+H2O	1.95184	168006189	VFZXRGDMRSXXNZ-CCAGOZQPSA-N	C1CC(=O)C=CC=CC2=CC(=C(C=C2)O)OC3=CC=C1C=C3	4.1				80.9650 3239344.5283|309.1093 1707938.7344|187.0762 1591078.3984|119.0501 579996.5371|265.1086 265282.4688	378073
7.99_388.1981m/z	7-O-Acetylintermedine N-oxide	C17H27NO7	7.9865	388.198	388.197	41.8	neg	M-H+CH3OH	2.62552	168011813	LQRKAEIDKZNCJO-MYWVZKBFSA-N	CC(C)C(C(C)O)(C(=O)OCC1=CC[N+]2(C1C(CC2)OC(=O)C)[O-])O	-0.4				61.9883 1160409.8750|78.9590 316278.8516|345.1729 152877.1875|80.9652 135801.6563|59.0137 123071.5078	125884
7.71_577.1377m/z	2',3'-Dehydromarmesin	C28H22O8	7.70858	577.138	577.135	61.9	neg	M+HCOOH+HCOO	5.19806	168011847	QAUXSIAWLGWIQX-UHFFFAOYSA-N	CC(C)(C1=CC2=C(O1)C=C3C(=C2)C=CC(=O)O3)OCC(C)(C4=CC5=C(O4)C=C6C(=C5)C=CC(=O)O6)O	4				193.0538 314003.3438|134.0378 135493.3594|189.8241 89944.5391|209.9100 88880.1406|470.1522 87781.8828	5.22599e+06
9.88_581.2779m/z	Deoxy euphorbia factor L1	C32H40O7	9.87632	581.278	581.275	45.2	neg	M+HCOO	4.28799	168011854	YTCGWKBKPYSRNN-RDKAUROFSA-N	CC1CC2(C(C1OC(=O)CC3=CC=CC=C3)C(C(=C)CCC4C(C4(C)C)C=C(C2=O)C)OC(=O)C)OC(=O)C	5.5	Lipids and lipid-like molecules	Prenol lipids	Diterpenoids	581.2780 267953.0859|165.0193 164031.3330|61.9883 108909.9688|122.0373 104579.2266|137.0242 104139.4609	175448
5.90_389.1822m/z	Borneol glucuronide	C16H26O7	5.90352	389.182	389.182	65.5	neg	M+CH3COO	1.565	168011903	NTOYHCBJHFKMNC-UXJAVLQNSA-N	CC1(C2CCC1(C(C2)OC3C(C(C(C(O3)C(=O)O)O)O)O)C)C	1.2				59.0138 1308236.5273|71.0139 851740.8125|101.0245 609823.7354|389.1841 516161.8750|113.0241 337496.1719	647684
5.59_547.1084m/z	Phloyoside II	C17H25ClO12	5.58695	547.108	547.107	57.5	neg	M+HCOOH+HCOO	2.76257	168011912	YMUFZYYUSKBPQJ-ASVDGFQLSA-N	CC1(C2C(OC=C(C2(C(C1Cl)O)O)C(=O)OC)OC3C(C(C(C(O3)CO)O)O)O)O	-2.8				357.0622 1267570.7344|339.0517 665915.2188|324.0278 534235.6328|191.0565 431986.1123|93.0347 286702.0703	270619
1.71_443.1779m/z	Rauvoyunine B	C23H26N2O6	1.70752	443.178	443.182	58.8	neg	M-H+H2O	-9.17331	168013421	CLKVTWIYTILMIO-KLRUVDGMSA-N	CC=C1CN2C3CC1C(C45C3(NC6=C4C=CC(=C6)O)OC2C5)(COC(=O)C)C(=O)OC	1.4				383.1562 480610.0742|59.0138 177236.4941|251.1137 166892.3132|71.0139 163624.4111|61.9884 132454.2852	842920
7.05_322.2377m/z	8-Gingerol	C19H30O4	7.05468	322.238	322.238	36.6	pos	M+NH4-H2O	-1.7221	168114	BCIWKKMTBRYQJU-INIZCTEOSA-N	CCCCCCCC(CC(=O)CCC1=CC(=C(C=C1)O)OC)O	4.2	Benzenoids	Phenols	Methoxyphenols	322.1043 1714839.1250|322.2380 1108371.7500|307.0837 627340.6250|131.0494 304507.8770|279.0876 209709.6875	76690.8
12.77_351.2533m/z	10-Gingerol	C21H34O4	12.7712	351.253	351.253	52.7	pos	M+H	0.762837	168115	AIULWNKTYPZYAN-SFHVURJKSA-N	CCCCCCCCCC(CC(=O)CCC1=CC(=C(C=C1)O)OC)O	5.3	Benzenoids	Phenols	Methoxyphenols	249.1849 660910.0625|336.1233 167131.7500|248.2009 109998.7578|308.1299 108257.0547|337.1315 104441.9219	36175.2
7.46_251.1642m/z	Nardosinone	C15H22O3	7.45717	251.164	251.164	49.4	pos	M+H	-0.0571371	168136	KXGHHSIMRWPVQM-JWFUOXDNSA-N	CC1CCC=C2C1(C3C(CC2=O)OOC3(C)C)C	2.9	Lipids and lipid-like molecules	Prenol lipids	Sesquiterpenoids	233.1563 411828.8926|81.0704 366563.4951|95.0859 315037.4277|105.0700 292642.9570|93.0703 273004.0557	823041
4.76_413.1421m/z	N6-Threonylcarbamoyladenosine	C15H20N6O8	4.7567	413.142	413.142	69.76	pos	[M+H]+	-0.703225	168854142	UNUYMBPXEFMLNW-OIPCWADOSA-N	CC(C(C(=O)O)NC(=O)NC1=C2C(=NC=N1)N(C=N2)C3C(C(C(O3)CO)O)O)O	-2.6				136.0616 6423652.7344|162.0410 4107111.3438|281.0992 4028744.7500|70.0657 753214.2637|120.0653 506931.7813	682944
9.66_253.1434m/z	7-oxabicyclo[4.1.0]hept-3-ylmethyl7-oxabicyclo[4.1.0]heptane-3-carboxylate	C14H20O4	9.65693	253.143	253.143	92.49	pos	[M+H]+	3.30504	16949	YXALYBMHAYZKAP-UHFFFAOYSA-N		1.5	Organoheterocyclic compounds	Oxepanes		193.1224 1852644.2656|151.0754 562690.8281|253.1487 405078.4063|109.0650 389836.4785|206.1545 124993.3906	190048
0.87_533.1716m/z	2'-FUCOSYLLACTOSE	C18H32O15	0.872067	533.172	533.172	84.1	neg	M+HCOO	-1.45132	170484	HWHQUWQCBPAQQH-BWRPKUOHSA-N	CC1C(C(C(C(O1)OC2C(C(C(OC2OC(C(CO)O)C(C(C=O)O)O)CO)O)O)O)O)O	-6.1	Organic oxygen compounds	Organooxygen compounds	Carbohydrates and carbohydrate conjugates	191.0558 9993937.4375|85.0295 719523.4824|93.0345 219651.1406|127.0400 167499.4063|87.0088 125292.4531	4.91287e+06
9.11_409.0917m/z	Irisflorentin	C20H18O8	9.10982	409.092	409.089	45.9	pos	M+Na	6.09007	170569	RISXUTCDCPHJFQ-UHFFFAOYSA-N	COC1=CC(=CC(=C1OC)OC)C2=COC3=CC4=C(C(=C3C2=O)OC)OCO4	2.9	Phenylpropanoids and polyketides	Isoflavonoids	O-methylated isoflavonoids	409.0910 2386632.8125|325.0701 607607.1641|310.0425 432143.5820|394.0681 254691.0938|282.0500 166252.4844	256036
5.79_186.1138m/z	8-Amino-7-oxononanoic acid	C9H17NO3	5.79102	186.114	186.114	40.1	neg	M-H	1.23441	173	GUAHPAJOXVYFON-UHFFFAOYSA-N	CC(C(=O)CCCCCC(=O)O)N	-2.2	Lipids and lipid-like molecules	Fatty Acyls	Fatty acids and conjugates	125.0971 2207315.9609|186.1141 2165882.5000|185.0822 510412.5938|57.0345 226600.7500|97.0659 194928.2656	96420.6
9.18_455.1354m/z	Lactupicrin	C23H22O7	9.17653	455.135	455.135	52.5	neg	M+HCOO	1.67082	174880	UMVSOHBRAQTGQI-XGARDCMYSA-N	CC1=C2C(C3C(C(C1)OC(=O)CC4=CC=C(C=C4)O)C(=C)C(=O)O3)C(=CC2=O)CO	1.1	Benzenoids	Phenols	1-hydroxy-2-unsubstituted benzenoids	178.9986 462290.6895|455.1303 330066.3516|376.0590 288576.1133|219.0661 251089.0371|189.0197 173548.6875	181983
6.45_247.0974m/z	Demethoxyencecalin	C13H14O2	6.44807	247.097	247.098	35.4	neg	M+HCOO	-0.883451	177040	ZAJTXVHECZCXLH-UHFFFAOYSA-N	CC(=O)C1=CC2=C(C=C1)OC(C=C2)(C)C	3	Organoheterocyclic compounds	Benzopyrans	1-benzopyrans	247.0975 2224494.0313|109.0294 278312.9912|119.0501 228480.1777|163.0401 164458.1465|150.0319 155828.1572	42299.3
4.90_355.1026m/z	Chlorogenic acid	C16H18O9	4.89888	355.103	355.102	92.6	pos	M+H	0.552393	1794427	CWVRJTMFETXNAD-JUHZACGLSA-N	C1C(C(C(CC1(C(=O)O)O)OC(=O)C=CC2=CC(=C(C=C2)O)O)O)O	-0.4	Organic oxygen compounds	Organooxygen compounds	Alcohols and polyols	163.0389 44166797.7656|145.0283 6088767.3086|135.0441 5614368.3071|117.0337 3578846.8984|89.0391 1340806.5664	1.0295e+07
1.84_361.1146m/z	Myrciaphenone A	C14H18O9	1.83532	361.115	361.113	35.4	neg	M-H+CH3OH	3.29167	179470	GFKQVLKFPJGJEP-RGCYKPLRSA-N	CC(=O)C1=C(C=C(C=C1OC2C(C(C(C(O2)CO)O)O)O)O)O	-1	Organic oxygen compounds	Organooxygen compounds	Carbohydrates and carbohydrate conjugates	138.0321 519997.8750|123.0087 500676.9063|301.0931 344549.1211|59.0138 312674.7500|61.9883 216290.3750	716909
5.90_521.1298m/z	Yuanhuanin	C22H22O11	5.90352	521.13	521.13	59	neg	M+CH3COO	-0.393284	179680	ZXVSQQSRCKKYLS-MIUGBVLSSA-N	COC1=CC2=C(C(=C1)OC3C(C(C(C(O3)CO)O)O)O)C(=O)C=C(O2)C4=CC(=C(C=C4)O)O	0.3	Phenylpropanoids and polyketides	Flavonoids	Flavonoid glycosides	161.0243 1565794.3438|93.0347 1200053.4141|135.0452 1118105.0078|197.0457 1116851.2266|359.0883 821053.6484	2.85938e+06
8.66_277.1081m/z	Spiciferone A	C14H16O3	8.66372	277.108	277.108	55.6	neg	M+HCOO	-0.0778077	180199	QMMMQWRPZIJGPT-AWEZNQCLSA-N	CCC1(C(=O)C=CC2=C1OC(=C(C2=O)C)C)C	2.1	Organoheterocyclic compounds	Pyrans	Pyranones and derivatives	277.1029 728477.1875|233.1171 331401.3203|216.0783 118815.6953|231.1001 95764.9844|205.1235 65269.3838	72318.6
2.15_150.0324m/z	Pterolactam	C5H9NO2	2.14938	150.032	150.033	56.9	neg	M+Cl	-3.16384	181561	VULIHENHKGDFAB-UHFFFAOYSA-N	COC1CCC(=O)N1	-0.4	Organoheterocyclic compounds	Pyrrolidines	Pyrrolidones	123.0449 37137284.0000|122.0374 6032164.0833|105.0346 5860721.2500|108.0215 4817618.9167|81.0346 3126140.4583	761720
5.71_279.1703m/z	Phenylalanylisoleucine (isomer of 1328)	C15H22N2O3	5.71148	279.171	279.172	79.73	pos	[M+H]+	-5.58059	18218232	JWBLQDDHSDGEGR-UHFFFAOYSA-N		-1.3	Organic acids and derivatives	Carboxylic acids and derivatives	Amino acids, peptides, and analogues	86.0970 13327829.0625|120.0810 12736888.1875|163.0389 4866537.0000|131.0492 4247495.7969|149.0237 2415555.8125	3.93681e+06
8.77_389.1233m/z	3'-Demethylnobiletin	C20H20O8	8.76547	389.123	389.123	90.8	pos	M+H	0.552398	183466	XFYYZBJXMSDKCV-UHFFFAOYSA-N	COC1=C(C=C(C=C1)C2=CC(=O)C3=C(O2)C(=C(C(=C3OC)OC)OC)OC)O	2.7	Phenylpropanoids and polyketides	Flavonoids	O-methylated flavonoids	389.1220 1806578.0469|359.0759 1529182.8125|374.0993 182436.2070|344.0534 171775.2188|313.0704 170685.8613	221447
5.53_203.0927m/z	Cleroindicin B	C8H14O3	5.52637	203.093	203.092	69.5	neg	M+HCOO	1.44602	184824	QLSFMYCHPVOSCD-UHFFFAOYSA-N	C1CC(CCC1=O)(CCO)O	-0.2	Organic oxygen compounds	Organooxygen compounds	Alcohols and polyols	203.0926 10818157.5000|157.0869 4414463.2500|141.0919 3384773.2500|59.0138 436882.7813|185.0816 422048.6250	489001
0.89_188.0565m/z	N-Acetylglutamic acid	C7H11NO5	0.894083	188.057	188.056	43.5	neg	M-H	0.419682	185	RFMMMVDNIPUKGG-UHFFFAOYSA-N	CC(=O)NC(CCC(=O)O)C(=O)O	-1.8	Organic acids and derivatives	Carboxylic acids and derivatives	Amino acids, peptides, and analogues	142.0509 4690377.4219|188.0564 4306450.7344|114.0559 3588238.1406|98.0247 3531612.5938|144.0665 2168456.0000	519436
9.31_323.1868m/z	9,16-Dioxo-10,12,14-octadecatrienoic acid	C18H26O4	9.30952	323.187	323.186	50.3	neg	M-H+H2O	3.09748	18546963	PQPRTPXWQQQKJC-KDXRDGMUSA-N	CCC(=O)C=CC=CC=CC(=O)CCCCCCCC(=O)O	3.4	Lipids and lipid-like molecules	Fatty Acyls	Lineolic acids and derivatives	323.1893 521417.6719|322.2056 248821.4922|235.0767 202236.6035|305.1762 131477.5283|279.2021 120899.2773	597240
4.39_370.1264m/z	Pseudoprotopine	C20H19NO5	4.39245	370.126	370.129	35.4	neg	M-H+H2O	-7.53856	185559	ZAALQOFZFANFTF-UHFFFAOYSA-N	CN1CCC2=CC3=C(C=C2C(=O)CC4=CC5=C(C=C4C1)OCO5)OCO3	2.8	Alkaloids and derivatives	Protopine alkaloids		61.9883 680208.6875|135.0452 266766.4023|307.1296 255406.1230|125.0244 91624.0195|161.0243 56975.6895	407818
6.87_216.0782n	alpha,beta-Dihydroresveratrol	C14H14O3	6.86788	275.092	275.093	44.65	neg	[M+HCOO]-	-2.1801	185914	HITJFUSPLYBJPE-UHFFFAOYSA-N	C1=CC(=CC=C1CCC2=CC(=CC(=C2)O)O)O	3.1	Phenylpropanoids and polyketides	Stilbenes		275.0928 1031651.2188|137.0244 628424.6738|125.0608 508440.5313|93.0346 308599.1973|231.1040 208064.6914	112887
6.11_565.1559m/z	Vicenin III	C26H28O14	6.108	565.156	565.155	54.8	pos	M+H	1.30106	185958	MMDUKUSNQNWVET-MCIQUCDDSA-N	C1C(C(C(C(O1)C2=C3C(=C(C(=C2O)C4C(C(C(C(O4)CO)O)O)O)O)C(=O)C=C(O3)C5=CC=C(C=C5)O)O)O)O	-2.2	Phenylpropanoids and polyketides	Flavonoids	Flavonoid glycosides	70.0657 77508.4922|86.0969 77260.7993|97.0289 49096.5859|511.1270 44129.6548|131.0493 41201.1211	1.14096e+06
3.28_141.0547m/z	Gentisyl alcohol	C7H8O3	3.28352	141.054	141.055	58.14	pos	[M+H]+	-4.03833	188287	PUZSUVGRVHEUQO-UHFFFAOYSA-N	C1=CC(=C(C=C1O)CO)O	0.7	Benzenoids	Phenols	Benzenediols	95.0495 350224.9688|99.0444 256761.2031|113.0596 229919.6250|141.0537 216487.7813|97.0653 209343.3906	162611
1.02_136.0618m/z	Adenine	C5H5N5	1.02322	136.062	136.062	84.13	pos	[M+H]+	-3.84112	190	GFFGJBXGBJISGV-UHFFFAOYSA-N	C1=NC2=NC=NC(=C2N1)N	-0.1	Organoheterocyclic compounds	Imidazopyrimidines	Purines and purine derivatives	136.0616 253078722.0000|119.0353 29500382.7500|94.0402 7599621.0000|121.0654 7174098.6250|110.0355 2379659.1250	1.30206e+08
6.07_511.1251m/z	Cadensin D	C25H22O9	6.07343	511.125	511.125	57.5	neg	M+HCOO	1.0425	190366	MIKIHCHUGBZLHD-DENIHFKCSA-N	COC1=CC(=CC(=C1O)OC)C2C(OC3=C4C(=CC(=C3O2)OC)C(=O)C5=CC=CC=C5O4)CO	3.1	Organoheterocyclic compounds	Benzodioxanes	Phenylbenzodioxanes	313.0717 7505940.3750|109.0294 3355584.2500|295.0609 3003012.3438|185.0246 1485745.9688|203.0349 1423426.0625	4.03472e+06
6.01_551.2125m/z	13,18-Dehydroglaucarubinone	C25H32O10	6.0128	551.212	551.213	67.8	neg	M+CH3COO	-1.77043	191882	VLFLFYQXNGASKC-MMFZEHEGSA-N	CCC(C)(C(=O)OC1C2C(=C)C(C3(C4C2(CO3)C(CC5C4(C(C(=O)C=C5C)O)C)OC1=O)O)O)O	-0.6	Lipids and lipid-like molecules	Prenol lipids	Terpene lactones	551.2121 815051.9063|59.0137 440041.6855|389.1601 339564.3594|71.0137 218950.2500|108.0214 203985.7109	1.13805e+06
1.60_155.0815m/z	Cyclo-prolylglycine	C7H10N2O2	1.60065	155.082	155.081	91.69	pos	[M+H]+	0.228502	193540	OWOHLURDBZHNGG-UHFFFAOYSA-N	C1CC2C(=O)NCC(=O)N2C1	-0.6	Organic acids and derivatives	Carboxylic acids and derivatives	Amino acids, peptides, and analogues	155.0814 11200726.1563|70.0657 3674515.4375|112.0757 2694823.4766|127.0867 1807648.6797|94.0656 1583608.2656	849599
5.33_563.1797m/z	Phellamurin	C26H30O11	5.3275	563.18	563.177	47.4	neg	M+HCOO	5.11244	193876	GRDZTDZJQRPNCN-YIANMRPHSA-N	CC(=CCC1=C(C=C(C2=C1OC(C(C2=O)O)C3=CC=C(C=C3)O)O)OC4C(C(C(C(O4)CO)O)O)O)C	2	Phenylpropanoids and polyketides	Flavonoids	Flavonoid glycosides	193.0499 23594.3008|165.0550 20038.7090|134.0370 19604.9189|341.1010 16700.3457|150.0315 16630.7500	349023
8.50_293.1394m/z	alpha-Cannabispiranol	C15H20O3	8.4982	293.139	293.139	56.8	neg	M+HCOO	-0.339364	194174	ZFFYHYZOCYEEPL-UHFFFAOYSA-N	COC1=CC2=C(C(=C1)O)C3(CCC(CC3)O)CC2	2.8	Benzenoids	Indanes	Indan-1-spirocyclohexanes	231.1391 2258451.8125|293.1400 2245830.0000|95.0502 1479323.3750|249.1501 656204.1875|229.1235 517578.0234	598222
6.67_311.0563m/z	4-(3,4-Dihydroxyphenyl)-6,7-dihydroxy-2-naphthalen	C17H12O6	6.67235	311.056	311.056	49.7	neg	M-H	0.645017	195328	ZSKDVJYWOHBGNI-UHFFFAOYSA-N	C1=CC(=C(C=C1C2=C3C=C(C(=CC3=CC(=C2)C(=O)O)O)O)O)O	2.9	Benzenoids	Naphthalenes	Naphthalenecarboxylic acids and derivatives	109.0295 997154.7498|267.0670 648715.8896|311.0549 604541.4023|149.0609 336246.4941|59.0139 264167.3318	298589
7.12_155.1078m/z	2-Pentylfuran	C9H14O	7.11647	155.108	155.107	41.6	neg	M-H+H2O	4.44493	19602	YVBAUDVGOFCUSG-UHFFFAOYSA-N	CCCCCC1=CC=CO1	3.7	Organoheterocyclic compounds	Heteroaromatic compounds		155.1077 3422673.9688|73.0295 195017.6875|59.0139 187773.0625|137.0973 178660.8359|114.0561 149011.3594	68967.2
4.77_265.1548m/z	LID_265.1546_9.2	C14H20N2O3	4.76597	265.155	265.155	92.91	pos	[M+H]+	0.690457	19938477	ADEUTXKFSFCDGG-UHFFFAOYSA-N		0.1	Benzenoids	Benzene and substituted derivatives	Benzoic acids and derivatives	120.0804 14694707.1406|265.1568 3373501.7500|177.0544 2811894.8750|72.0813 2003120.3906|145.0284 1457998.6172	2.13667e+06
4.97_239.0557m/z	Gibepyrone D	C10H10O4	4.9727	239.056	239.056	79.5	neg	M+HCOO	-1.85789	20056005	MQNNRPUVAMHCCO-FNORWQNLSA-N	CC1=CC=C(OC1=O)C(=CC(=O)O)C	1.7	Organoheterocyclic compounds	Pyrans	Pyranones and derivatives	239.0556 29018434.3958|179.0345 14687056.9167|177.0555 9352871.2552|149.0606 8406245.2500|107.0501 4869142.2292	6.93738e+07
10.43_271.1912m/z	Prohydrojasmon	C15H26O3	10.4319	271.191	271.191	39.4	neg	M-H+H2O	1.33472	20056433	IPDFPNNPBMREIF-CHWSQXEVSA-N	CCCCCC1C(CCC1=O)CC(=O)OCCC	3.6	Lipids and lipid-like molecules	Fatty Acyls	Lineolic acids and derivatives	271.1911 1597148.1406|209.1911 779886.1875|253.1807 657842.7109|270.1584 61126.9102|271.0559 35612.5273	163559
5.67_211.0978m/z	Isobutyl 4-hydroxybenzoate	C11H14O3	5.66628	211.098	211.097	37.2	neg	M-H+H2O	4.03327	20240	XPJVKCRENWUEJH-UHFFFAOYSA-N	CC(C)COC(=O)C1=CC=C(C=C1)O	3.4	Benzenoids	Benzene and substituted derivatives	Benzoic acids and derivatives	72.9931 497364.3301|211.0973 463334.3438|152.0472 373602.4766|124.0401 336161.8555|137.0972 320186.9707	74573.1
4.92_247.1080m/z	PRI_247.1079_16.2	C13H14N2O3	4.92102	247.108	247.108	57.99	pos	[M+H]+	-1.79219	21139611	KCYRVQQKJYMPAM-UHFFFAOYSA-N	CC(C(=O)O)NC1=C2C(=CC(=C1)OC)C=CC=N2	2.1	Organoheterocyclic compounds	Quinolines and derivatives	Aminoquinolines and derivatives	156.0767 1885627.3750|131.0494 1783437.4297|86.0970 1095084.7773|84.0813 769754.1699|72.0814 736122.0820	949209
12.25_352.1907m/z	AM580	C22H25NO3	12.2533	352.191	352.191	92.68	pos	[M+H]+	0.00708325	2126	SZWKGOZKRMMLAJ-UHFFFAOYSA-N	CC1(CCC(C2=C1C=CC(=C2)C(=O)NC3=CC=C(C=C3)C(=O)O)(C)C)C	5.4	Benzenoids	Benzene and substituted derivatives	Anilides	74.0970 562955.8535|352.1534 521950.8438|336.1231 229093.2500|337.1301 181394.3770|308.1292 156808.6113	73357.3
5.45_241.1193m/z	Pyroglutamyl-Isoleucine	C11H18N2O4	5.45062	241.119	241.119	57.56	neg	[M-H]-	-0.406096	21405068	MKCVLTRITQNGQI-UHFFFAOYSA-N	CC[C@H](C)[C@@H](C(=O)O)N	0.3	Organic acids and derivatives	Carboxylic acids and derivatives	Amino acids, peptides, and analogues	241.1184 8212946.6875|197.1291 4934567.3750|61.9882 3023499.0000|82.0297 1143520.0000|141.1034 1133846.6406	1.57059e+06
6.01_264.0876m/z	Trolline	C12H13NO3	6.0128	264.088	264.088	37.7	neg	M+HCOO	-0.601465	21574476	LJIDRFNRDLYHNC-UHFFFAOYSA-N	C1CC(=O)N2C1C3=CC(=C(C=C3CC2)O)O	0.6	Organoheterocyclic compounds	Tetrahydroisoquinolines		164.0717 1323143.7969|246.0771 830632.5469|98.0248 568104.4180|147.0452 500234.2305|202.0873 488899.1523	244049
5.95_517.2191m/z	Strictosidinic acid	C26H32N2O9	5.95112	517.22	517.219	80.36	pos	[M+H]+	0.87218	21586927	CMMIVMFGFIBAGC-IUNANRIWSA-N	C=CC1C(C(=COC1OC2C(C(C(C(O2)CO)O)O)O)C(=O)O)CC3C4=C(CCN3)C5=CC=CC=C5N4	-2	Lipids and lipid-like molecules	Prenol lipids	Terpene glycosides	371.1125 752633.3359|192.0780 727440.2734|131.0492 526799.4688|97.0289 410130.8125|86.0970 387266.9297	329006
8.30_263.1286m/z	Graniline	C15H20O4	8.29803	263.129	263.129	78.2	neg	M-H	-1.08048	21593565	ZEIYNPAINVEWGP-PVZBEVCSSA-N	CC12CC3C(CC1C(=C)C(CC2O)O)C(=C)C(=O)O3	0.9	Lipids and lipid-like molecules	Prenol lipids	Terpene lactones	263.1283 8169218.0625|219.1392 3907093.1250|201.1284 1190373.9141|81.0347 986356.5625|191.1429 839695.0391	2.25216e+06
8.35_349.2025m/z	ent-11alpha-Hydroxy-15-oxokaur-16-en-19-oic acid	C20H28O4	8.35265	349.203	349.201	73.8	neg	M-H+H2O	3.26615	21593620	NSFLYGNWNATSHL-UKFLMKJWSA-N	CC12CCCC(C1CCC34C2C(CC(C3)C(=C)C4=O)O)(C)C(=O)O	3.1	Lipids and lipid-like molecules	Prenol lipids	Diterpenoids	349.2021 8022042.6250|287.2013 1743432.1719|161.0245 1028273.3984|313.0709 227711.2500|331.1930 204496.2949	1.05201e+06
7.15_215.1077m/z	Pilosol A	C13H12O	7.15365	215.108	215.107	52.2	neg	M-H+CH3OH	2.44125	21593834	QUBDTHLFIKDCBG-UHFFFAOYSA-N	CC(CC#CC#CC1=CC=CC=C1)O	2.7	Lipids and lipid-like molecules	Fatty Acyls	Fatty alcohols	215.1074 10337889.5000|111.0451 1791213.6875|200.0842 834172.9141|159.0449 640203.9961|83.0502 555736.0664	126997
5.68_363.1301m/z	6-Epiharpagide	C15H24O10	5.67952	363.13	363.13	69	neg	M-H	1.17011	21604821	XUWSHXDEJOOIND-VOAFIZDZSA-N	CC1(CC(C2(C1C(OC=C2)OC3C(C(C(C(O3)CO)O)O)O)O)O)O	-3.3	Lipids and lipid-like molecules	Prenol lipids	Terpene glycosides	191.0560 1977126.2188|173.0455 1383495.1250|363.1237 1061138.5000|93.0344 1055454.3438|85.0658 917258.0547	262356
5.09_341.0884m/z	Leucodrin	C15H16O8	5.09425	341.088	341.087	38.4	neg	M-H+H2O	3.66264	21607505	JVCLQSJXGOABTC-SHGFOSJLSA-N	C1C(C2(C(C(OC2=O)C(CO)O)O)OC1=O)C3=CC=C(C=C3)O	-0.5	Benzenoids	Phenols	1-hydroxy-2-unsubstituted benzenoids	163.0401 1034375.1172|119.0503 604882.1875|59.0138 440447.6250|341.0817 301950.7695|179.0599 288527.6885	521882
7.71_535.1244m/z	Haploperoside A	C22H28O13	7.70858	535.124	535.122	51.3	neg	M+Cl	4.04536	21607625	FCIZPHNZRNLUJD-HLUXVQISSA-N	CC1C(C(C(C(O1)OCC2C(C(C(C(O2)OC3=C(C=C4C=CC(=O)OC4=C3)OC)O)O)O)O)O)O	-1.9	Phenylpropanoids and polyketides	Coumarins and derivatives	Coumarin glycosides	313.0724 409663.0703|134.0372 335771.1875|535.1135 279088.3828|193.0506 210589.6660|298.0460 165514.3726	139632
7.46_720.3891m/z	Suavissimoside F1	C36H56O12	7.46208	720.389	720.396	78.6	neg	M-H+CH3CN	-9.95951	21626352	YXSQSVWHKZZWDD-FPLSKCGGSA-N	CC1CCC2(CCC3(C(=CCC4C3(CCC5C4(CC(C(C5(C)C(=O)O)O)O)C)C)C2C1(C)O)C)C(=O)OC6C(C(C(C(O6)CO)O)O)O	2.4	Lipids and lipid-like molecules	Prenol lipids	Terpene glycosides	157.0141 4078027.3125|69.0345 1704868.9512|113.0243 902882.1914|562.3615 613430.0313|71.0138 345257.2500	760583
6.71_441.1772m/z	8-Epicrepiside E	C21H28O9	6.7148	441.177	441.176	55.7	neg	M-H+H2O	2.66406	21636138	XNFZJASXPNFCQW-CEJIZLNCSA-N	C=C1CC(C2C(C3C1CC(C3=C)OC4C(C(C(C(O4)CO)O)O)O)OC(=O)C2=C)O	-1.2	Lipids and lipid-like molecules	Prenol lipids	Terpene lactones	191.0561 1256306.9102|93.0345 825865.3809|441.1773 698756.1094|173.0454 639663.1504|59.0138 167370.3281	576535
7.14_259.0970m/z	Pterolactone A	C15H16O4	7.14227	259.097	259.098	84.1	neg	M-H	-2.2056	21668923	QEXKRFPEOUYPOW-GFCCVEGCSA-N	CC1=C2C(=CC3=C1CCOC3=O)C(C(C2=O)(C)C)O	1.7	Benzenoids	Indanes	Indanones	215.1078 48628618.0000|259.0972 32100757.2500|197.0975 3539765.8438|182.0731 1811068.2500|209.9393 761811.4375	8.35091e+06
6.36_453.1760m/z	5-O-Methylvisammioside	C22H28O10	6.35905	453.176	453.176	94.5	pos	M+H	1.14246	21670038	QVGFPTYGKPLXPK-OOBAEQHESA-N	CC1=CC(=O)C2=C(C3=C(C=C2O1)OC(C3)C(C)(C)OC4C(C(C(C(O4)CO)O)O)O)OC	0.3	Organoheterocyclic compounds	Benzopyrans	1-benzopyrans	453.1754 7715496.6250|291.1227 6959689.7500|273.1121 3570548.6563|243.0652 3224065.0938|231.0648 2509782.1719	1.02014e+06
10.69_501.3219m/z	Ilexgenin A	C30H46O6	10.6919	501.322	501.322	71.7	neg	M-H	-0.569528	21672638	UIEGOKVPCRANSU-XUFMHOFVSA-N	CC1CCC2(CCC3(C(=CCC4C3(CCC5C4(CCC(C5(C)C(=O)O)O)C)C)C2C1(C)O)C)C(=O)O	5.2	Lipids and lipid-like molecules	Prenol lipids	Triterpenoids	501.3218 1829893.3438|439.3226 391301.7969|423.2910 337741.6602|277.2173 314990.1250|457.3326 180043.4453	610982
5.45_407.1466m/z	Altiloxin B	C15H23ClO4	5.45062	407.147	407.148	70.5	neg	M+CH3COOH+HCOO	-3.83805	21771907	FZDLFIRMAQCUGH-MSKJFZEMSA-N	CC1(C(CCC2(C13C(O3)CC(C2C(=O)O)(C)O)C)Cl)C	2.6	Organoheterocyclic compounds	Oxepanes		119.0500 1720726.9531|371.1246 984019.0781|327.1349 625499.8047|389.1345 455236.1875|96.0089 423719.4063	364598
1.22_117.0193m/z	Succinic acid	C4H6O4	1.22062	117.019	117.019	93	neg	M-H	-0.561473	21952380	KDYFGRWQOYBRFD-UHFFFAOYSA-N	C(CC(=O)O)C(=O)O	-0.6	Organic acids and derivatives	Carboxylic acids and derivatives	Dicarboxylic acids and derivatives	73.0295 63576951.0625|117.0193 15626203.1159|99.0088 6546023.4382|116.9285 4371796.7396|74.0329 1259142.9922	8.5404e+07
7.51_246.1256n	alpha-Santonin	C15H18O3	7.50585	247.133	247.133	92.72	pos	[M+H]+	-0.0772664	221071	XJHDMGJURBVLLE-BOCCBSBMSA-N	CC1C2CCC3(C=CC(=O)C(=C3C2OC1=O)C)C	2.3	Lipids and lipid-like molecules	Prenol lipids	Terpene lactones	187.1116 5294650.0000|247.1371 4301523.3750|229.1235 4272882.3750|201.1273 3923267.3750|173.1330 2488528.0938	2.69834e+06
1.31_477.1256m/z	Licoagroside B	C18H24O12	1.31413	477.126	477.125	38.4	neg	M+HCOO	1.44461	22297602	WCVUIHQUPRXYKT-RGCIIANRSA-N	CC1=C(C(=O)C=CO1)OC2C(C(C(C(O2)COC(=O)CC(C)(CC(=O)O)O)O)O)O	-2.4	Lipids and lipid-like molecules	Saccharolipids		108.0216 1671018.3398|477.1242 1620612.6719|152.0114 1567316.2813|59.0137 226884.8906|71.0138 164650.7656	240983
6.85_200.0930m/z	Arecoline	C8H13NO2	6.85382	200.093	200.093	64.1	neg	M+HCOO	1.20513	2230	HJJPJSXJAXAIPN-UHFFFAOYSA-N	CN1CCC=C(C1)C(=O)OC	0.3	Alkaloids and derivatives			156.1030 1594670.2422|102.0560 361888.5459|199.0982 240715.8516|155.1079 176470.1250|199.1355 159943.5938	281889
1.81_173.0821m/z	Suberic acid	C8H14O4	1.8056	173.082	173.082	53.73	neg	[M-H]-	1.98968	22494956	TYFQFVWCELRYAO-UHFFFAOYSA-N	C(CCCC(=O)O)CCC(=O)O	1	Lipids and lipid-like molecules	Fatty Acyls	Fatty acids and conjugates	129.0557 2042424.6875|173.0434 1951005.5000|85.0296 1299679.0703|111.0450 1130247.6250|93.0346 1125418.9766	66550.3
5.51_303.0514m/z	2-(2,4-Dihydroxybenzoyl)benzoic acid	C14H10O5	5.51	303.051	303.051	50	neg	M+HCOO	1.46367	225394	KIEFFPFIBREPIX-UHFFFAOYSA-N	C1=CC=C(C(=C1)C(=O)C2=C(C=C(C=C2)O)O)C(=O)O	3	Benzenoids	Benzene and substituted derivatives	Benzophenones	137.0244 2148015.5547|109.0294 1335983.3984|259.0611 1241395.4844|61.9884 329655.2188|135.0452 227765.4639	218919
6.81_223.0744m/z	Azelaic acid	C9H16O4	6.80502	223.074	223.074	74.9	neg	M+Cl	0.735049	2266	BDJRBEYXGGNYIS-UHFFFAOYSA-N	C(CCCC(=O)O)CCCC(=O)O	1.6	Lipids and lipid-like molecules	Fatty Acyls	Fatty acids and conjugates	187.0974 1924691.3594|125.0971 814354.9297|59.0137 482154.7246|121.0657 228709.4150|204.0022 202557.4297	239696
7.14_261.1128m/z	Helenalin	C15H18O4	7.14227	261.113	261.113	73.1	neg	M-H	-1.66434	23205	ZVLOPMNVFLSSAA-XEPQRQSNSA-N	CC1CC2C(C(C3(C1C=CC3=O)C)O)C(=C)C(=O)O2	1.4	Lipids and lipid-like molecules	Prenol lipids	Terpene lactones	261.1123 4364121.1250|69.0346 3285382.7500|217.1218 2400396.7188|137.0972 2250681.7500|169.1025 1042651.5625	425904
0.96_256.0936m/z	Benserazide	C10H15N3O5	0.95595	256.094	256.096	77.57	neg	[M-H]-	-6.45319	2327	BNQDCRGUHNALGH-UHFFFAOYSA-N	C1=CC(=C(C(=C1CNNC(=O)C(CO)N)O)O)O	-1.3	Organic acids and derivatives	Carboxylic acids and derivatives	Amino acids, peptides, and analogues	128.0352 2835898.2617|256.0942 2523851.5000|127.0513 1528002.8906|75.0088 1417380.6875|238.0835 1252486.8125	417993
7.48_261.0404m/z	Bergapten	C12H8O4	7.47798	261.04	261.04	84.5	neg	M+HCOO	-0.453117	2355	BGEBZHIAGXMEMV-UHFFFAOYSA-N	COC1=C2C=CC(=O)OC2=CC3=C1C=CO3	2.3	Phenylpropanoids and polyketides	Coumarins and derivatives	Furanocoumarins	217.0503 1693157.6094|158.0374 1335692.4453|202.0274 745791.0859|130.0425 205661.2090|173.0609 192517.7344	260327
2.36_631.1936m/z	3'-Hydroxydehydroaglaiastatin	C31H28N2O7	2.36258	631.194	631.193	43.8	neg	M+HCOOH+HCOO	0.531278	23562692	AUJMBFPBXOTPLC-UHFFFAOYSA-N	COC1=C(C=C(C=C1)C23C(C4=C(C2(C5=C(O3)C=C(C=C5OC)OC)O)N=C6CCCN6C4=O)C7=CC=CC=C7)O	2.3	Phenylpropanoids and polyketides	Stilbenes		197.0456 414956.9004|72.9931 203150.0957|135.0450 195393.3008|179.0350 142068.4180|123.0451 121225.7344	175342
7.51_335.2231m/z	16-Hydroxycleroda-3,13-dien-15,16-olide	C20H30O3	7.51488	335.223	335.222	94.4	neg	M-H+H2O	2.7954	23633845	LVSCWEDTMWAASP-RQRNCZJESA-N	CC1CCC2(C(C1(C)CCC3=CC(=O)OC3O)CCC=C2C)C	4.5	Lipids and lipid-like molecules	Prenol lipids	Terpene lactones	335.2225 23310771.7500|291.2317 349761.6250|289.2167 97469.3203|334.2133 96031.8750|135.0464 86745.3203	1.35507e+06
6.40_498.1169n	Silyamandin	C25H22O11	6.39555	515.12	515.119	44.5	neg	M-H+H2O, M+CH3COOH+HCOO	1.31655	23634490	BVNNAIYNHUXFCR-QRVGLHCZSA-N	COC1=C(C=CC(=C1)C2C3COC(=O)C3C(=CC2C(=O)O)C4C(C(=O)C5=C(C=C(C=C5O4)O)O)O)O	1.4	Phenylpropanoids and polyketides	Flavonoids	Flavans	395.0777 2749837.1250|59.0138 1941955.3516|308.0326 851910.7109|323.0575 831149.0391|73.0295 344045.5938	2.7281e+06
5.53_531.1147m/z	6'-Malonyltrifolirhizin	C25H24O13	5.52637	531.115	531.114	73	neg	M-H	0.627018	23724669	ZHXRWFOBROFZAC-LVYGOKBNSA-N	C1C2C(C3=C(O1)C=C(C=C3)OC4C(C(C(C(O4)COC(=O)CC(=O)O)O)O)O)OC5=CC6=C(C=C25)OCO6	0.4	Phenylpropanoids and polyketides	Isoflavonoids	Furanoisoflavonoids	191.0562 1268909.8047|135.0452 395347.5527|173.0459 249831.5391|487.1236 236841.5117|93.0346 172682.8311	213820
0.00_127.0391m/z	5-Hydroxymethylfurfural	C6H6O3	0.00496667	127.039	127.039	84.5	pos	M+H	0.767801	237332	NOEGNKMFWQHSLB-UHFFFAOYSA-N	C1=C(OC(=C1)C=O)CO	-0.6	Organic oxygen compounds	Organooxygen compounds	Carbonyl compounds	127.0384 6062652.1836|109.0285 3950383.2852|81.0340 2154185.1113|108.0450 717941.3945|53.0393 685977.5781	4.32448e+06
9.42_365.1978m/z	2,4-Dihydroxy-6-pentyl-3-prenylbenzoic acid	C18H26O4	9.42032	365.198	365.197	41.7	neg	M+CH3COO	3.0386	23874497	UJSSSFNGQWZNEN-UHFFFAOYSA-N	CCCCCC1=CC(=C(C(=C1C(=O)O)O)CC=C(C)C)OC	6	Benzenoids	Benzene and substituted derivatives	Benzoic acids and derivatives	365.1968 3696240.1875|321.2073 2140339.7188|364.2216 263864.0625|365.0711 178111.3164|329.2356 132198.8730	660077
4.51_187.0978m/z	Dihydroterrein	C8H12O3	4.5132	187.098	187.097	47.8	neg	M-H+CH3OH	4.9773	23902334	LFRFNLMDZHTVHB-UHFFFAOYSA-N	CCCC1=CC(=O)C(C1O)O	-0.2	Organic oxygen compounds	Organooxygen compounds	Alcohols and polyols	144.0454 2392782.3125|187.0969 791741.0625|125.0970 289645.1934|143.0712 120304.2969|187.0602 94485.2734	221698
1.75_227.0562m/z	2',6'-Dihydroxy-4'-methoxyacetophenone	C9H10O4	1.75252	227.056	227.056	37.3	neg	M+HCOO	0.63431	24135	GKSGTWUNURZTKD-UHFFFAOYSA-N	CC(=O)C1=C(C=C(C=C1O)OC)O	1.4	Organic oxygen compounds	Organooxygen compounds	Carbonyl compounds	153.0194 340173.7891|227.0564 300286.3516|168.0427 227703.7100|82.0299 176022.6719|140.0714 151135.8462	362635
7.44_354.2175m/z	Vindolinine	C21H24N2O2	7.43525	354.218	354.218	48.8	pos	M+NH4	-0.248265	24148538	JSLDLCGKZDUQSH-SBDPWIONSA-N	CC1C23CC(C14C5(C2N(CC5)CC=C3)C6=CC=CC=C6N4)C(=O)OC	2.9	Organoheterocyclic compounds	Indoles and derivatives	Carbazoles	144.0808 5674450.7813|131.0492 3287702.2500|188.1071 1937188.0625|354.2168 1862839.2500|212.1280 1130068.2500	2.82021e+06
1.08_118.0650n	Benzoic acid	C7H6O2	1.08003	123.044	123.044	69.36	pos	[M+H]+	-0.189814	243	WPYMKLBDIGXBTP-UHFFFAOYSA-N	C1=CC=C(C=C1)C(=O)O	1.9	Benzenoids	Benzene and substituted derivatives	Benzoic acids and derivatives	80.0500 32829164.0000|78.0343 25349648.0000|95.0494 19079953.7500|106.0291 8234554.0000|77.0389 6217787.0000	4.87922e+07
0.83_117.0789n	betaine	C5H11NO2	0.830883	156.042	156.042	61.4	pos	M+K, 2M+Na, M+Na	-0.344442	247	KWIUHFFTVRNATP-UHFFFAOYSA-N	C[N+](C)(C)CC(=O)[O-]	0.5	Organic acids and derivatives	Carboxylic acids and derivatives	Amino acids, peptides, and analogues	140.0682 52041621.5000|96.0788 33265016.2500|74.0970 10327651.0000|114.0892 798872.1250|81.0555 665301.4375	1.93981e+07
8.44_399.1455m/z	4'-O-Methyllicoflavanone	C21H22O5	8.43515	399.146	399.145	45.6	neg	M+HCOO	1.72231	24795707	OSVQFBUNCMAMER-IBGZPJMESA-N	CC(=CCC1=C(C=CC(=C1)C2CC(=O)C3=C(C=C(C=C3O2)O)O)OC)C	4.6	Phenylpropanoids and polyketides	Flavonoids	Flavans	108.0217 1323670.5000|355.1559 681524.5703|193.0871 495631.7695|59.0138 422858.5293|136.0167 380419.9375	226718
11.65_429.2980m/z	(25RS)-Ruscogenin	C27H42O4	11.6496	429.298	429.301	51.5	neg	M-H	-7.04326	24849056	QMQIQBOGXYYATH-ZBTLHKOBSA-N	CC1CCC2(C(C3C(O2)CC4C3(CCC5C4CC=C6C5(C(CC(C6)O)O)C)C)C)OC1	4.7	Lipids and lipid-like molecules	Prenol lipids	Triterpenoids	429.3032 404124.3516|99.0564 297858.3984|87.0564 259186.7813|74.0248 130698.0469|141.0672 92933.0376	73515.1
10.22_373.2009m/z	7-beta-Hydroxylathyrol	C20H30O5	10.221	373.201	373.198	63.9	pos	M+Na	6.63423	24868376	NVDZRSWQWPPKAI-GNQYTXSHSA-N	CC1CC2(C(C1O)C(C(=C)C(CC3C(C3(C)C)C=C(C2=O)C)O)O)O	0.9	Lipids and lipid-like molecules	Prenol lipids	Diterpenoids	373.1276 4652647.3125|343.0807 4100779.9688|358.1051 509000.7422|257.1161 485004.1406|297.0751 419823.7695	130292
4.95_157.0507m/z	6-Methyl-5,6-dihydropyran-2-one	C6H8O2	4.94747	157.051	157.051	37.3	neg	M+HCOO	0.831091	24869	DYNKRGCMLGUEMN-UHFFFAOYSA-N	CC1CC=CC(=O)O1	1.1	Organoheterocyclic compounds	Pyrans	Pyranones and derivatives	113.0606 1986314.1094|157.0491 314971.9635|127.0039 165378.2765|59.0139 136639.2240|114.0922 96774.3867	772391
9.33_271.1693m/z	17beta-Trenbolone	C18H22O2	9.32605	271.169	271.167	93.89	pos	[M+H]+	9.86673	25015	MEHHPFQKXOUFFV-OWSLCNJRSA-N	CC12C=CC3=C4CCC(=O)C=C4CCC3C1CCC2O	1.9	Lipids and lipid-like molecules	Steroids and steroid derivatives	Estrane steroids	254.2479 455844.7813|271.0603 450009.0000|271.1745 195961.7480|159.0802 138326.3555|100.0761 117305.2188	49566.6
5.47_457.1720m/z	Geoside	C21H30O11	5.46575	457.172	457.172	43.1	neg	M-H	0.979694	25087713	FSCNUJMKSQHQSY-KJYATZHYSA-N	COC1=C(C=CC(=C1)CC=C)OC2C(C(C(C(O2)COC3C(C(C(CO3)O)O)O)O)O)O	-1.3	Organic oxygen compounds	Organooxygen compounds	Carbohydrates and carbohydrate conjugates	191.0561 1943818.3438|173.0455 1021535.0352|457.1647 426965.4180|93.0345 367867.7793|87.0088 157812.4063	631204
5.51_419.1562m/z	Zataroside A	C16H24O7	5.51	419.156	419.156	39	neg	M+HCOOH+HCOO	1.0443	25102046	KSNLTHGWURXRJK-IBEHDNSVSA-N	CC1=CC(=C(C=C1O)C(C)C)OC2C(C(C(C(O2)CO)O)O)O	0.7	Lipids and lipid-like molecules	Prenol lipids	Terpene glycosides	59.0137 3148716.9023|61.9883 243712.1563|161.0461 182961.1406|71.0138 182515.6875|101.0241 176457.0781	658130
9.11_252.1728n	Sydonol	C15H24O3	9.11043	297.171	297.171	42.1	neg	M-H, M+HCOO	1.17164	25112062	YOBQORBMRZQKGS-HNNXBMFYSA-N	CC(C)CCCC(C)(C1=C(C=C(C=C1)CO)O)O	3.2	Lipids and lipid-like molecules	Prenol lipids	Sesquiterpenoids	251.1672 1479552.3750|250.1513 161357.6406|207.1384 62387.7275|251.0447 60553.5537|179.0716 56692.8608	256363
9.11_253.1809m/z	15-Dihydroepioxylubimin	C15H26O3	9.11043	253.181	253.181	40	neg	M-H	0.0825863	25200803	NPIIWZCGVADPIE-KYFQHEKYSA-N	CC1C(C(CC(C12CCC(C2)C(=C)C)CO)O)O	2.5	Lipids and lipid-like molecules	Prenol lipids	Sesquiterpenoids	59.0138 4206452.1563|253.1829 3035999.0000|193.0717 1070253.7891|57.0345 972694.1992|195.1392 504673.9102	176788
6.69_343.1192m/z	Moracin P	C19H18O5	6.68763	343.119	343.118	54.3	neg	M-H+H2O	3.15218	25208124	QFUCSEIKNTUPPA-GOSISDBHSA-N	CC1(C(CC2=C(O1)C=C3C(=C2)C=C(O3)C4=CC(=CC(=C4)O)O)O)C	3.3	Phenylpropanoids and polyketides	2-arylbenzofuran flavonoids		177.0557 7838459.9688|343.1173 3100926.2813|135.0451 1600830.1016|59.0138 985385.2500|109.0295 751533.5781	349934
8.15_609.2917m/z	Hellebrigenin-3-O--glucoside	C30H42O11	8.1529	609.292	609.291	69.3	neg	M-H+CH3OH	1.09215	259577	TVKPTWJPKVSGJB-XHCIOXAKSA-N	C[C@]12CC[C@H]3[C@H]([C@]1(CC[C@@H]2C4=COC(=O)C=C4)O)CC[C@]5([C@@]3(CC[C@@H](C5)O)C=O)O	1.2				119.0502 241547.8701|415.1927 125601.1406|145.0658 118809.1992|295.1347 90638.6484|171.0825 36354.3047	319751
12.42_402.2409n	Telocinobufagin	C24H34O5	12.4186	385.238	385.237	43.2	pos	M+H-H2O, M+NH4-H2O	0.741165	259991	PBSOJKPTQWWJJD-ZBDZJSKLSA-N	CC12CCC(CC1(CCC3C2CCC4(C3(CCC4C5=COC(=O)C=C5)O)C)O)O	2.5	Lipids and lipid-like molecules	Steroids and steroid derivatives	Steroid lactones	385.2364 263537.6055|367.2263 167524.1016|193.1223 161891.9922|175.1119 151507.3623|213.0888 121707.0469	1.08086e+06
7.86_260.1290m/z	Cochlearine	C15H19NO3	7.8557	260.129	260.129	38.3	neg	M-H	-0.941021	261618	OJADCNKLFKWRHJ-UHFFFAOYSA-N	CN1C2CCC1CC(C2)OC(=O)C3=CC(=CC=C3)O	2.6	Benzenoids	Benzene and substituted derivatives	Benzoic acids and derivatives	228.1028 1191892.3047|260.1292 859766.2500|217.1244 301905.7500|145.0293 261275.3438|231.1030 201832.5313	43868.2
9.57_262.1084m/z	Allosecurinin	C13H15NO2	9.57435	262.108	262.108	57.8	neg	M+HCOO	-0.227936	267769	SWZMSZQQJRKFBP-UHFFFAOYSA-N	C1CCN2C(C1)C34CC2C=CC3=CC(=O)O4	1.1	Organoheterocyclic compounds	Indolizidines		161.0481 1750207.5234|218.1190 527548.6875|160.0403 403522.1875|219.1397 194591.3125|262.1061 167593.2188	94755.3
0.84_180.0634n	L-GLUCOSE	C6H12O6	0.835367	179.056	179.056	52.1	neg	M-H, M-H+CH3OH, M+CH3COOH+HCOO	0.145387	2724488	WQZGKKKJIJFFOK-ZZWDRFIYSA-N	C([C@@H]([C@@H]([C@H]([C@@H](C=O)O)O)O)O)O	-2.6	Organic oxygen compounds	Organooxygen compounds	Carbohydrates and carbohydrate conjugates	105.0193 2958675.4297|104.0353 1299199.1250|74.0248 299382.2119|61.9883 172222.3281|59.0139 100089.2344	8.91274e+06
8.20_311.0926m/z	5-Methyl-7-methoxyisoflavone	C17H14O3	8.20427	311.093	311.092	56	neg	M+HCOO	0.423971	2734290	WGOUYULOZZRTFS-UHFFFAOYSA-N	CC1=CC(=CC2=C1C(=O)C(=CO2)C3=CC=CC=C3)OC	3.5	Phenylpropanoids and polyketides	Isoflavonoids	O-methylated isoflavonoids	252.0793 716020.2500|311.0921 644221.7891|181.0874 460591.4707|161.0607 341927.4043|296.0711 204148.1250	163228
5.83_239.0925m/z	Ethyl 3-(4-hydroxyphenyl)propionate	C11H14O3	5.8289	239.093	239.092	40.5	neg	M+HCOO	0.0305608	2736435	UFMFPPAZUJDUMY-UHFFFAOYSA-N	CCOC(=O)CCC1=CC=C(C=C1)O	2.4	Lipids and lipid-like molecules	Fatty Acyls	Fatty acid esters	59.0138 2621576.9219|239.0930 1539403.6250|195.1024 1086961.4375|239.0533 517773.6563|179.0349 389239.5586	351248
2.77_282.1198m/z	1-Methyladenosine	C11H15N5O4	2.77255	282.12	282.122	86.85	pos	[M+H]+	-9.17414	27476	GFYLSDSUCHVORB-IOSLPCCCSA-N	CN1C=NC2=C(C1=N)N=CN2C3C(C(C(O3)CO)O)O	-1	Nucleosides, nucleotides, and analogues	Purine nucleosides		136.0616 11642770.0313|282.1195 774861.5625|131.0496 244199.5938|69.0339 221852.7969|123.0796 207686.7754	1.01924e+07
7.86_304.1180m/z	N-Benzoyl-(2R,3S)-3-phenylisoserine	C16H15NO4	7.86482	304.118	304.119	50	pos	M+H2O+H	-1.77183	2762289	HYJVYOWKYPNSTK-UONOGXRCSA-N	C1=CC=C(C=C1)C(C(C(=O)O)O)NC(=O)C2=CC=CC=C2	1.7	Benzenoids	Benzene and substituted derivatives	Benzoic acids and derivatives	198.0551 3684314.8438|240.1020 3390429.3125|229.1223 2739012.0625|286.1072 1247179.4141|211.1118 1030673.8203	395143
5.93_251.0559m/z	Citropten	C11H10O4	5.931	251.056	251.056	75.9	neg	M+HCOO	-1.15775	2775	NXJCRELRQHZBQA-UHFFFAOYSA-N	COC1=CC2=C(C=CC(=O)O2)C(=C1)OC	1.9	Phenylpropanoids and polyketides	Coumarins and derivatives		148.0529 4673243.1563|207.0661 3000116.7656|251.0537 361008.8750|163.0737 356655.9648|131.0500 228340.3125	1.00851e+06
1.05_109.0295m/z	Pyrocatechol	C6H6O2	1.04802	109.029	109.03	76.23	neg	[M-H]-	-0.305464	289	YCIMNLLNPGFGHC-UHFFFAOYSA-N	C1=CC=C(C(=C1)O)O	0.9	Benzenoids	Phenols	Benzenediols	109.0294 14461161.3750|108.0217 1284497.6250|81.0347 285437.7500|91.0190 191223.7031|108.0454 190779.2969	200696
0.86_360.1502m/z	Maltose	C12H22O11	0.858217	360.15	360.15	63.1	pos	M+NH4	0.495214	294	GUBGYTABKSRVRQ-UHFFFAOYSA-N	C(C1C(C(C(C(O1)OC2C(OC(C(C2O)O)O)CO)O)O)O)O	-4.7	Organic oxygen compounds	Organooxygen compounds	Carbohydrates and carbohydrate conjugates	85.0288 1401966.8164|127.0390 1009402.4961|145.0495 897328.0000|69.0341 482860.0957|97.0287 419543.3125	856051
2.38_261.0072m/z	Homovanillic Acid Sulfate	C9H10O7S	2.37513	261.007	261.007	45.1	neg	M-H	-1.02578	29981063	IACOAKYXFIWAQN-UHFFFAOYSA-N	COC1=C(C=CC(=C1)CC(=O)O)OS(=O)(=O)O	0	Organic acids and derivatives	Organic sulfuric acids and derivatives	Arylsulfates	61.9883 9867058.5820|261.0065 2728269.7969|181.0506 2032024.4922|119.0503 879030.0215|163.0403 783689.4375	2.15204e+06
9.97_432.2150n	Schisandrin	C24H32O7	9.97147	415.212	415.212	78.7	pos	M+H-H2O, M+NH4	0.538517	3001664	YEFOAORQXAOVJQ-RZFZLAGVSA-N	CC1CC2=CC(=C(C(=C2C3=C(C(=C(C=C3CC1(C)O)OC)OC)OC)OC)OC)OC	4	Phenylpropanoids and polyketides	Tannins	Hydrolyzable tannins	415.2085 126210.1484|207.1014 74562.1865|119.0856 65342.6484|81.0703 56553.3789|93.0703 55869.4023	555476
7.26_483.2372m/z	Isovouacapenol C	C27H34O5	7.2579	483.237	483.239	46.8	neg	M+HCOO	-3.80446	3009285	YMUSGWGTHSRGHT-WVTZLOSNSA-N	CC1C2C(CC3=C1C=CO3)C4(CCCC(C4(C(C2O)OC(=O)C5=CC=CC=C5)O)(C)C)C	5	Lipids and lipid-like molecules	Prenol lipids	Diterpenoids	78.9590 1815150.1450|152.9957 1422596.1973|483.2365 1015623.6563|171.0063 201329.0400|96.9699 164400.8438	345189
6.22_217.1081m/z	Hydroxysebacic acid	C10H18O5	6.21923	217.108	217.107	55.82	neg	[M-H]-	2.70245	3017884	OQYZCCKCJQWHIE-UHFFFAOYSA-N	C(CCCC(=O)O)CCC(CC(=O)O)O	0.8	Organic acids and derivatives	Hydroxy acids and derivatives	Medium-chain hydroxy acids and derivatives	217.1073 4800839.6250|171.1027 1958945.0625|158.0373 1779644.2344|155.1077 1413827.8672|217.0497 1075461.5625	2.21595e+06
6.79_383.1964m/z	Isocorynoxeine	C22H26N2O4	6.79308	383.196	383.197	84.3	pos	M+H	-0.448971	3037448	MUVGVMUWMAGNSY-VKCGGMIFSA-N	COC=C(C1CC2C3(CCN2CC1C=C)C4=CC=CC=C4NC3=O)C(=O)OC	2.1	Organoheterocyclic compounds	Indolizidines		383.1980 76601239.3125|160.0758 45051999.8281|132.0812 8848837.2168|108.0811 8743865.5688|267.1491 7449040.1484	1.12173e+08
10.33_381.2652m/z	Darutigenol	C20H34O3	10.3298	381.265	381.264	78.8	neg	M+CH3COO	1.84785	3037565	NCAZLDCEJHFJDT-KHKZNYETSA-N	CC1(C2CCC3=CC(CCC3C2(CCC1O)C)(C)C(CO)O)C	3.2	Lipids and lipid-like molecules	Prenol lipids	Diterpenoids	295.1915 2629920.2949|277.1808 1913596.3223|381.2659 408364.1641|363.2539 339875.3335|279.1965 289696.8604	900158
7.97_369.2171m/z	Hirsutine	C22H28N2O3	7.97262	369.217	369.217	71.7	pos	M+H	-0.511138	3037884	NMLUOJBSAYAYEM-AZQGJTAVSA-N	CCC1CN2CCC3=C(C2CC1C(=COC)C(=O)OC)NC4=CC=CC=C34	3.4	Alkaloids and derivatives	Corynanthean-type alkaloids		369.2168 100057911.8750|144.0807 44811843.8711|170.0965 10564037.0703|226.1436 7625903.4863|238.1448 6293096.0605	1.43492e+08
5.12_222.1127m/z	N-methylcorydaldine	C12H15NO3	5.1213	222.113	222.113	76.29	pos	[M+H]+	-2.00733	303906	BDIZBBGNYDRCCA-UHFFFAOYSA-N	CN1CCC2=CC(=C(C=C2C1=O)OC)OC	1.4	Organoheterocyclic compounds	Isoquinolines and derivatives	Isoquinolones and derivatives	222.1132 655143.0625|131.0494 492941.3223|91.0546 370962.8276|204.1030 298388.0703|119.0491 287182.9326	749835
4.71_267.0508m/z	Fraxinol	C11H10O5	4.70807	267.051	267.051	42.2	neg	M+HCOO	-1.13418	3047739	PBPNOAHYDPHKFH-UHFFFAOYSA-N	COC1=C(C(=C2C=CC(=O)OC2=C1)OC)O	1.5	Phenylpropanoids and polyketides	Coumarins and derivatives	Hydroxycoumarins	59.0138 453226.2813|267.0457 330379.7188|221.0455 287617.5625|223.0585 167594.0391|266.0651 138473.8281	85532.5
5.08_314.1750m/z	alpha-Codeimethine	C19H23NO3	5.07648	314.175	314.176	93.79	pos	[M+H]+	-1.97208	3082222	ZOCTZZQDDXGIRB-WXRFYESLSA-N	CN(C)CCC12C3C=CC(C1OC4=C(C=CC(=C24)C=C3)OC)O	2.5	Benzenoids	Phenanthrenes and derivatives		314.1804 1441196.8594|58.0658 1038325.0938|182.0498 1012697.4492|86.0970 591302.8730|107.0495 417823.7793	131962
10.24_371.1876m/z	Danshenol B	C22H26O4	10.243	371.188	371.186	87.6	neg	M-H+H2O	5.14579	3083515	KZLPKGGMSDHTRS-YTEVENLXSA-N	CC1COC2=C1C(=O)C(C3=C2C=CC4=C3CCCC4(C)C)(CC(=O)C)O	3.7	Lipids and lipid-like molecules	Prenol lipids	Diterpenoids	296.1417 3271157.5313|371.1863 2614737.0625|281.1176 751510.2891|59.0138 749911.5000|311.1660 738020.5234	243143
7.62_284.0688n	Obtusifolin	C16H12O5	7.62357	285.076	285.076	54.3	pos	M+H, M+CH3OH+H	1.23052	3083575	NYRXUBDGDSRBGB-UHFFFAOYSA-N	CC1=CC2=C(C(=C1O)OC)C(=O)C3=C(C2=O)C=CC=C3O	3	Benzenoids	Anthracenes	Anthraquinones	167.0341 1149703.3516|317.0980 770239.6250|177.0549 581346.4453|227.1067 518323.2266|243.1019 436124.9688	303345
5.16_223.0602m/z	Fraxidin	C11H10O5	5.15867	223.06	223.06	92.73	pos	[M+H]+	0.610561	3083616	QNFBKOHHLAWWTC-UHFFFAOYSA-N	COC1=C(C(=C2C(=C1)C=CC(=O)O2)O)OC	1.5	Phenylpropanoids and polyketides	Coumarins and derivatives	Hydroxycoumarins	223.0595 4006279.9531|204.1023 1065775.2500|190.0260 884689.1641|91.0546 710334.3906|222.1141 690597.8750	141377
0.85_280.1037m/z	Cyclic N-Acetyl-D-mannosamine	C8H15NO6	0.84635	280.104	280.104	64.2	neg	M+CH3COO	-0.391949	3084028	VVQPUTSNIMAJPT-UHFFFAOYSA-N	CC(=O)NC1C(C(C(OC1O)CO)O)O.O	-1.7	Organic oxygen compounds	Organooxygen compounds	Carbohydrates and carbohydrate conjugates	118.0509 2251255.5313|74.0247 584785.6680|96.9699 495350.2188|101.0244 414664.6563|190.0724 322374.3086	196874
3.60_315.1085m/z	Cornoside	C14H20O8	3.59652	315.109	315.109	47.7	neg	M-H	-0.0479713	3084796	VTVARPTUBCBNJX-WJTVCTBASA-N	C1=CC(C=CC1=O)(CCOC2C(C(C(C(O2)CO)O)O)O)O	-2.1	Organic oxygen compounds	Organooxygen compounds	Carbohydrates and carbohydrate conjugates	153.0556 3055659.0664|123.0450 1662085.7041|315.1094 132799.0625|135.0458 116131.7935|59.0139 57299.4844	796312
10.17_192.1150n	Senkyunolide A	C12H16O2	10.1694	193.122	193.122	75.6	pos	M+H, M+CH3CN+H, M+H-H2O	-0.0599555	3085257	ZPIKVDODKLJKIN-NSHDSACASA-N	CCCCC1C2=C(C=CCC2)C(=O)O1	2.7	Organoheterocyclic compounds	Isobenzofurans		175.1118 1251703.3841|147.1167 1062789.1732|105.0701 971116.2819|91.0546 684050.9219|119.0857 607372.2578	2.1366e+07
6.88_315.1228m/z	Gigantol	C16H18O4	6.88028	315.123	315.121	62.8	pos	M+H2O+Na	7.31679	3085362	SDXKZPQOVUDXIY-UHFFFAOYSA-N	COC1=C(C=C(C=C1)CCC2=CC(=CC(=C2)OC)O)O	2.7	Phenylpropanoids and polyketides	Stilbenes		297.1129 2162534.9688|269.1198 1282732.3281|315.1256 1229883.6250|251.1089 958333.5234|223.1136 845369.9609	507473
0.98_191.0197m/z	Citric acid	C6H8O7	0.975383	191.02	191.02	93.4	neg	M-H	-0.141004	311	KRKNYBCHXYNGOX-UHFFFAOYSA-N	C(C(=O)O)C(CC(=O)O)(C(=O)O)O	-1.7	Organic acids and derivatives	Carboxylic acids and derivatives	Tricarboxylic acids and derivatives	111.0085 185584709.6249|87.0086 79620415.2562|85.0294 59228446.1328|191.0199 31283198.0554|57.0346 10644344.0504	2.63553e+08
5.50_639.3084m/z	Ergocristine	C35H38N5O5	5.49863	639.308	639.306	38.8	neg	M-H+CH3OH	4.47981	31116	HEFIYUQVAZFDEE-MKTPKCENSA-N	CC(C)C1(C(=O)N2C(C(=O)N3CCCC3C2(O1)O)CC4=CC=CC=C4)NC(=O)C5CN(C6CC7=CNC8=CC=CC(=C78)C6=C5)C	3	Alkaloids and derivatives	Ergoline and derivatives	Lysergic acids and derivatives	253.1080 2683073.1250|209.1184 661224.6758|191.1080 622392.6758|165.0919 597800.6563|147.0815 531840.4902	581119
1.16_130.0874m/z	Pyrrolidine	C4H9N	1.15628	130.087	130.087	42.8	neg	M+CH3COO	0.733599	31268	RWRDLPDLKQPQOW-UHFFFAOYSA-N	C1CCNC1	0.5	Organoheterocyclic compounds	Pyrrolidines		130.0871 12514438.5816|87.0458 5730681.2135|88.0400 835342.9358|85.0293 645165.0087|113.0234 463600.0382	3.09877e+07
8.20_308.1867m/z	Metipranolol	C17H27NO4	8.20427	308.187	308.187	45.8	neg	M-H	0.0584295	31477	BQIPXWYNLPYNHW-UHFFFAOYSA-N	CC1=CC(=C(C(=C1OC(=O)C)C)C)OCC(CNC(C)C)O	2.7	Benzenoids	Phenol esters		308.1891 2029262.7500|307.1914 1067648.7500|74.0248 785109.1270|80.9652 220127.3125|117.0345 118066.7344	119967
2.01_406.1627m/z	Croalbidine	C18H29NO7	2.0133	406.163	406.164	49.2	neg	M+Cl	-2.85952	317194	CYVCLVKKOTUWRC-UHFFFAOYSA-N	CC(C)C1C(=O)OC2CCN3C2C(COC(=O)C(C1(C)O)(C)O)C(C3)O	-0.1	Organoheterocyclic compounds	Pyrrolizidines		164.0717 16118529.0625|147.0451 4760774.3125|103.0554 1484645.5234|72.0091 1128048.2500|241.0833 362809.6250	3.55459e+06
10.65_269.0452m/z	Emodin	C15H10O5	10.6462	269.045	269.046	84.3	neg	M-H	-1.2025	3220	RHMXXJGYXNZAPX-UHFFFAOYSA-N	CC1=CC2=C(C(=C1)O)C(=O)C3=C(C2=O)C=C(C=C3O)O	2.7	Benzenoids	Anthracenes	Anthraquinones	269.0444 2464754.4297|225.0556 396370.4463|241.0503 140839.3096|109.0295 75410.9026|254.1683 58023.4355	527787
2.59_185.0458m/z	Endothal	C8H10O5	2.59495	185.046	185.045	63.71	neg	[M-H]-	4.92774	3225	GXEKYRXVRROBEV-UHFFFAOYSA-N	C1CC2C(C(C1O2)C(=O)O)C(=O)O	-0.5	Organic acids and derivatives	Carboxylic acids and derivatives	Dicarboxylic acids and derivatives	142.0326 358906.2090|141.0555 239651.8818|123.0449 163030.7759|185.0473 144539.1367|97.0658 125302.0703	246822
1.08_164.0475n	Coumarin	C9H6O2	1.08003	147.044	147.044	80.09	pos	[M+H]+	0.658007	323	ZYGHJZDHTFUPRJ-UHFFFAOYSA-N	C1=CC=C2C(=C1)C=CC(=O)O2	1.4	Phenylpropanoids and polyketides	Coumarins and derivatives		119.0493 12227899.8125|91.0547 4670565.9531|147.0437 3615776.1875|87.0445 2631833.1250|146.0925 2097580.4063	4.1824e+06
0.76_148.0605m/z	L-Glutamic acid	C5H9NO4	0.7555	148.06	148.06	92.72	pos	[M+H]+	0.213845	33032	WHUUTDBJXJRKMK-VKHMYHEASA-N	C(CC(=O)O)C(C(=O)O)N	-3.7	Organic acids and derivatives	Carboxylic acids and derivatives	Amino acids, peptides, and analogues	84.0812 2820157.5625|84.0449 1286867.5000|130.0864 370888.7188|130.0502 213060.6094|102.0551 181931.5000	88729.2
10.10_286.1449m/z	Etodolac	C17H21NO3	10.098	286.145	286.145	54.28	neg	[M-H]-	0.00815898	3308	NNYBQONXHNTVIJ-UHFFFAOYSA-N	CCC1=C2C(=CC=C1)C3=C(N2)C(OCC3)(CC)CC(=O)O	2.8	Organoheterocyclic compounds	Indoles and derivatives	Indolyl carboxylic acids and derivatives	286.1458 4741618.6875|285.1489 2243133.7500|242.1546 1674994.3125|185.1334 1469505.2031|257.1537 974862.3750	381808
10.55_245.1182m/z	Chloranthalactone A	C15H16O2	10.5454	245.118	245.118	59.6	neg	M-H+H2O	2.17007	333361	OVEQSZKTJIUNHZ-JDTTZNEISA-N	CC1=C2CC3C(=C)C4CC4C3(C=C2OC1=O)C	2.3	Organoheterocyclic compounds	Naphthofurans		245.1185 1402990.6719|201.1285 700187.0391|61.9884 82876.0781|183.1172 50115.6724|145.0659 49536.1240	76710.8
10.04_269.0817m/z	Medicarpin	C16H14O4	10.0372	269.082	269.082	73	neg	M-H	-0.905942	336327	NSRJSISNDPOJOP-BBRMVZONSA-N	COC1=CC2=C(C=C1)C3COC4=C(C3O2)C=CC(=C4)O	2.6	Phenylpropanoids and polyketides	Isoflavonoids	Furanoisoflavonoids	269.0789 874575.7500|254.0587 297613.9180|210.0684 138416.9688|109.0295 99253.8984|225.0526 72994.0625	123050
8.16_165.0923m/z	6-Pentyl-2H-pyran-2-one	C10H14O2	8.16433	165.092	165.092	75.46	neg	[M-H]-	0.980334	33960	MAUFTTLGOUBZNA-UHFFFAOYSA-N	CCCCCC1=CC=CC(=O)O1	3	Organoheterocyclic compounds	Pyrans	Pyranones and derivatives	121.0294 566661.6250|134.0070 550350.3750|150.0327 230757.1016|165.0189 168716.1094|149.0097 147268.1094	25760.9
1.18_144.0667m/z	Guvacine	C6H9NO2	1.18378	144.067	144.066	49.8	neg	M-H+H2O	5.40398	3532	QTDZOWFRBNTPQR-UHFFFAOYSA-N	C1CNCC(=C1)C(=O)O	-2.5	Alkaloids and derivatives			100.0401 3133914.0000|72.0454 1077092.5215|99.0450 768023.1875|102.0561 761712.1680|115.0400 602437.9336	131446
4.63_215.0828m/z	Gentianine	C10H9NO2	4.62785	215.083	215.082	36.2	neg	M-H+CH3CN	4.61902	354616	DFNZYFAJQPLJFI-UHFFFAOYSA-N	C=CC1=CN=CC2=C1CCOC2=O	1.5	Organoheterocyclic compounds	Pyranopyridines		171.0930 2900999.8438|215.0845 2857437.7813|116.0699 2299508.0000|116.0488 2123383.7500|86.0248 2054096.7578	244257
6.65_190.0630n	7-Ethoxycoumarin	C11H10O3	6.64635	235.061	235.061	73.2	neg	M-H+H2O, M+HCOO	-0.199044	35703	LIFAQMGORKPVDH-UHFFFAOYSA-N	CCOC1=CC2=C(C=C1)C=CC(=O)O2	2.3	Phenylpropanoids and polyketides	Coumarins and derivatives		147.0809 1085708.1914|235.0630 986669.3945|135.0451 984662.0859|191.0724 977613.8594|192.0426 903729.2666	934803
10.61_389.1232m/z	5-O-Demethylnobiletin	C20H20O8	10.6146	389.123	389.123	96.5	pos	M+H	0.397016	358832	DOFJNFPSMUCECH-UHFFFAOYSA-N	COC1=C(C=C(C=C1)C2=CC(=O)C3=C(C(=C(C(=C3O2)OC)OC)OC)O)OC	3.2	Phenylpropanoids and polyketides	Flavonoids	O-methylated flavonoids	389.1230 2556363.6250|359.0760 1544747.4375|341.0655 618369.9219|197.0081 341134.8311|169.0138 164463.2656	305452
1.86_258.0618m/z	4-Hydroxy-L-phenylglycine	C8H9NO3	1.85683	258.062	258.062	43.3	neg	M+HCOOH+HCOO	-0.895063	36143	LJCWONGJFPCTTL-ZETCQYMHSA-N	C1=CC(=CC=C1C(C(=O)O)N)O	-2.1	Organic acids and derivatives	Carboxylic acids and derivatives	Amino acids, peptides, and analogues	110.0246 1709160.7188|196.0615 583082.2363|61.9883 300256.0938|130.0873 299844.6250|257.0607 195677.0977	468612
6.03_329.0673m/z	Maackiain	C16H12O5	6.02843	329.067	329.067	63.8	neg	M+HCOO	2.08622	363863	HUKSJTUUSUGIDC-UHFFFAOYSA-N	C1C2C(C3=C(O1)C=C(C=C3)O)OC4=CC5=C(C=C24)OCO5	2.5	Phenylpropanoids and polyketides	Isoflavonoids	Furanoisoflavonoids	175.0402 522998.2891|109.0294 464489.1484|285.0742 327307.6016|59.0138 221829.6045|285.1427 173324.5811	89932.4
6.95_173.1184m/z	FA 9:0+1O	C9H18O3	6.9461	173.118	173.117	59.37	neg	[M-H]-	4.37356	36599	XBUXARJOYUQNTC-UHFFFAOYSA-N	CCCCCCC(CC(=O)O)O	2	Organic acids and derivatives	Hydroxy acids and derivatives	Medium-chain hydroxy acids and derivatives	173.1181 3468941.0729|130.0656 432823.7223|173.0220 377766.9844|127.1129 365880.1855|129.0921 234386.2135	2.83565e+06
1.62_169.0144m/z	Gallic acid	C7H6O5	1.6239	169.014	169.014	91	neg	M-H	1.08179	370	LNTHITQWFMADLM-UHFFFAOYSA-N	C1=C(C=C(C(=C1O)O)O)C(=O)O	0.7	Benzenoids	Benzene and substituted derivatives	Benzoic acids and derivatives	125.0245 8791051.2063|169.0152 4037183.0117|81.0345 407687.5594|97.0294 314237.4297|79.0192 300732.7500	2.50428e+06
4.39_305.1146m/z	Cyclo(prolyltyrosyl)	C14H16N2O3	4.39245	305.115	305.114	42.9	neg	M+HCOO	1.29521	371682	LSGOTAXPWMCUCK-UHFFFAOYSA-N	C1CC2C(=O)NC(C(=O)N2C1)CC3=CC=C(C=C3)O	1	Organic acids and derivatives	Carboxylic acids and derivatives	Amino acids, peptides, and analogues	61.9882 1948173.7656|133.0294 1416839.2227|131.0714 652198.8848|135.0455 171888.4639|305.1071 141654.4492	527475
4.64_259.0723m/z	Kinetin	C10H8N5O	4.64132	259.072	259.071	35.7	neg	M+HCOO	5.81345	3830	QANMHLXAZMSUEX-UHFFFAOYSA-N	C1=COC(=C1)CNC2=NC=NC3=C2NC=N3	1	Organoheterocyclic compounds	Imidazopyrimidines	Purines and purine derivatives	215.0826 7814898.2500|171.0928 4095958.4688|116.0505 3252173.6875|92.0506 3146644.4375|86.0248 2894456.2500	1.0803e+06
5.05_433.1146m/z	Robustaside D	C21H22O10	5.05232	433.115	433.114	78.2	neg	M-H	1.43371	38358972	KQIQKULTIAJZKL-VHFDLOJPSA-N	C1=CC(=CC=C1O)OC2C(C(C(C(O2)COC(=O)C=CC3(C=CC(=O)C=C3)O)O)O)O	-0.6	Lipids and lipid-like molecules	Saccharolipids		59.0138 1827008.5859|181.0507 1093148.0313|343.0825 585076.5898|209.0822 419975.5898|161.0241 370785.4141	268845
9.88_325.1449m/z	Alpinoid D	C20H20O3	9.87632	325.145	325.144	48.6	neg	M-H+H2O	3.10747	38363343	FQYPVFASDPWNIJ-UHFFFAOYSA-N	COC1=C(C=CC(=C1)CC2=CC=C(O2)CCC3=CC=CC=C3)O	4.8	Phenylpropanoids and polyketides	Diarylheptanoids	Linear diarylheptanoids	325.1390 2305661.2500|135.0451 1621928.3984|293.1179 463047.7656|310.1206 389748.5313|307.1916 350304.5273	263765
1.50_141.0194m/z	Kojic acid	C6H6O4	1.49518	141.019	141.019	75.46	neg	[M-H]-	1.23212	3840	BEJNERDRQOWKJM-UHFFFAOYSA-N	C1=C(OC=C(C1=O)O)CO	-0.9	Organoheterocyclic compounds	Pyrans	Pyranones and derivatives	97.0292 517402.1641|111.0085 492719.9635|69.0346 414198.2565|141.0193 250364.2656|85.0294 220807.5807	1.73921e+06
5.15_159.0665m/z	Pimelic acid	C7H12O4	5.1513	159.066	159.066	56.8	neg	M-H	1.11772	385	WLJVNTCWHIRURA-UHFFFAOYSA-N	C(CCC(=O)O)CCC(=O)O	0.5	Lipids and lipid-like molecules	Fatty Acyls	Fatty acids and conjugates	115.0764 8761291.5938|159.0664 4462043.2500|141.0553 296940.3125|61.9884 288703.5313|73.0292 188016.4063	264653
7.80_191.0350m/z	Norviburtinal	C9H6O2	7.80105	191.035	191.035	38.4	neg	M+HCOO	0.239839	390664	VRMFZTBAWYVGGB-UHFFFAOYSA-N	C1=COC=C2C1=CC=C2C=O	1.4	Organic oxygen compounds	Organooxygen compounds	Carbonyl compounds	111.0087 3519815.6406|87.0088 1467725.0547|147.0454 1244350.1250|59.0138 1157873.9766|85.0296 1081712.7969	71127.9
6.26_235.0611m/z	7-Methoxy-4-methylcoumarin	C11H10O3	6.25543	235.061	235.061	77.9	neg	M+HCOO	-0.385267	390807	UDFPKNSWSYBIHO-UHFFFAOYSA-N	CC1=CC(=O)OC2=C1C=CC(=C2)OC	2.2	Phenylpropanoids and polyketides	Coumarins and derivatives		191.0710 5214375.7500|235.0611 2267426.7031|175.0399 1375623.2500|108.0215 904149.9375|161.0240 768423.4375	841477
6.47_261.1341m/z	Virginiaebutanolide C	C11H20O4	6.47322	261.134	261.134	49.8	neg	M+HCOO	-1.02895	40565489	ONFPUQOPHZOEKF-UTLUCORTSA-N	CCCCCC(C1C(COC1=O)CO)O	1.7	Lipids and lipid-like molecules	Fatty Acyls	Fatty alcohols	125.0971 1946939.8281|187.0975 1560336.6875|261.1343 969809.7500|146.0609 467813.7813|218.0827 246449.1250	349086
3.48_124.0404m/z	2-Hydroxymethyl-5-hydroxypyridine	C6H7NO2	3.47677	124.04	124.04	35.9	neg	M-H	0.137103	419490	NESFDGDRYVANBC-UHFFFAOYSA-N	C1=CC(=NC=C1O)CO	-0.4	Organoheterocyclic compounds	Pyridines and derivatives	Hydroxypyridines	94.0298 4584051.4598|124.0400 1838137.2826|66.0348 1320908.4870|78.0349 336986.2109|106.0289 281001.9748	1.77634e+06
4.80_453.1881m/z	Flemichin D	C25H26O6	4.80052	453.188	453.192	40.1	neg	M-H+CH3OH	-7.71196	42608041	DFVFCZXJTRKRPI-UHFFFAOYSA-N	CC(=CCC1=C2C(=C(C3=C1OC(CC3=O)C4=C(C=C(C=C4)O)O)O)C=CC(O2)(C)C)C	5.2	Phenylpropanoids and polyketides	Flavonoids	Flavans	119.0502 4143578.9688|291.1346 3298268.0313|363.1562 696755.8047|171.0775 681571.7246|145.0296 547224.8848	783921
6.64_227.0915m/z	Sarracenin	C11H14O5	6.63878	227.092	227.091	43.7	pos	M+H	0.515765	427877	QGBCGMGBGAHJIT-UHFFFAOYSA-N	CC1C2C3CC(O1)OC2OC=C3C(=O)OC	0.8	Organoheterocyclic compounds	Dioxanes	1,3-dioxanes	167.0705 2548998.7813|177.0547 732156.2266|86.0971 423037.7813|209.1171 364867.3750|149.0600 355161.0605	118198
9.66_435.2381m/z	Schisanhenol	C23H30O6	9.65693	435.238	435.238	51.4	pos	M+CH3OH+H	0.856767	433451	FYSHYFPJBONYCQ-UHFFFAOYSA-N	CC1CC2=CC(=C(C(=C2C3=C(C(=C(C=C3CC1C)OC)OC)OC)O)OC)OC	4.9	Phenylpropanoids and polyketides	Tannins	Hydrolyzable tannins	209.1173 509468.5938|153.0547 288409.9785|191.1067 267938.3223|163.1116 193770.4736|93.0703 107727.4727	400407
0.78_539.1376m/z	Raffinose	C18H32O16	0.776933	539.138	539.138	92.9	neg	M+Cl	-1.69274	439242	MUPFEKGTMRGPLJ-ZQSKZDJDSA-N	C(C1C(C(C(C(O1)OCC2C(C(C(C(O2)OC3(C(C(C(O3)CO)O)O)CO)O)O)O)O)O)O)O	-5.8	Organic oxygen compounds	Organooxygen compounds	Carbohydrates and carbohydrate conjugates	383.1188 3735041.5000|179.0560 2175049.9375|59.0148 1995326.3750|341.1083 1757540.1719|89.0243 1277349.3750	5.93329e+06
5.57_355.1025m/z	Scopolin	C16H18O9	5.56622	355.103	355.102	75.2	pos	M+H	0.497546	439514	SGTCGCCQZOUMJJ-YMILTQATSA-N	COC1=C(C=C2C(=C1)C=CC(=O)O2)OC3C(C(C(C(O3)CO)O)O)O	-1.1	Phenylpropanoids and polyketides	Coumarins and derivatives	Coumarin glycosides	193.0498 6448819.4063|131.0493 707686.6367|259.1804 445610.2734|86.0970 425118.7813|188.1074 403019.9297	227064
5.51_757.2314m/z	Stachyose	C24H42O21	5.51	757.231	757.225	67.3	neg	M+HCOOH+HCOO	8.85013	439531	UQZIYBXSHAGNOE-XNSRJBNMSA-N	C(C1C(C(C(C(O1)OCC2C(C(C(C(O2)OCC3C(C(C(C(O3)OC4(C(C(C(O4)CO)O)O)CO)O)O)O)O)O)O)O)O)O)O	-8	Organic oxygen compounds	Organooxygen compounds	Carbohydrates and carbohydrate conjugates	151.0037 3023454.7031|301.0742 2566242.7188|595.1690 2316508.0000|164.0114 1084070.6113|107.0138 853822.3887	1.22237e+06
1.35_281.1255m/z	5-Methyl-2'-deoxycytidine	C10H15N3O4	1.34915	281.125	281.125	48.9	neg	M-H+CH3CN	2.18032	440055	LUCHPKXVUGJYGU-XLPZGREQSA-N	CC1=CN(C(=O)N=C1N)C2CC(C(O2)CO)O	-1.4	Nucleosides, nucleotides, and analogues	Pyrimidine nucleosides	Pyrimidine 2'-deoxyribonucleosides	150.0419 27509256.0000|133.0154 6836519.0000|94.0297 3628163.1094|108.0202 2378438.5000|107.0361 915741.1250	166955
9.95_286.1575n	2-Hydroxyestrone	C18H22O3	9.95077	345.171	345.171	46.9	neg	M-H+H2O, M+CH3COO	2.16964	440623	SWINWPBPEKHUOD-JPVZDGGYSA-N	CC12CCC3C(C1CCC2=O)CCC4=CC(=C(C=C34)O)O	2.8	Lipids and lipid-like molecules	Steroids and steroid derivatives	Estrane steroids	345.1708 5398008.8750|315.1601 545056.4473|309.2066 402175.6016|327.1601 372577.9941|59.0134 157198.1016	1.10109e+06
1.17_205.0355m/z	(L)-Dehydroascorbic acid	C6H6O6	1.16667	205.035	205.035	60.1	neg	M-H+CH3OH	3.74353	440667	SBJKKFFYIZUCET-JLAZNSOCSA-N	C(C(C1C(=O)C(=O)C(=O)O1)O)O	-1	Organoheterocyclic compounds	Lactones	Gamma butyrolactones	111.0086 15746495.8750|125.0243 5348321.4688|173.0089 4382443.2344|72.9931 3730188.0000|154.9987 2926985.0156	2.0351e+06
11.65_345.2078m/z	Cortodoxone	C21H30O4	11.6496	345.208	345.207	56.4	neg	M-H	1.86888	440707	WHBHBVVOGNECLV-OBQKJFGGSA-N	CC12CCC(=O)C=C1CCC3C2CCC4(C3CCC4(C(=O)CO)O)C	2.5	Lipids and lipid-like molecules	Steroids and steroid derivatives	Hydroxysteroids	345.2078 2981376.7539|287.2016 461722.7163|301.2170 241873.2476|59.0130 65058.5488|344.2231 64504.1406	478843
7.50_287.0560m/z	Eriodictyol	C15H12O6	7.5024	287.056	287.056	76	neg	M-H	-0.445819	440735	SBHXYTNGIZCORC-ZDUSSCGKSA-N	C1C(OC2=CC(=CC(=C2C1=O)O)O)C3=CC(=C(C=C3)O)O	2	Phenylpropanoids and polyketides	Flavonoids	Flavans	135.0450 2937401.4375|151.0035 2847436.3125|287.0543 750501.3047|107.0137 409436.2813|61.9882 277754.2500	526133
8.66_209.0821m/z	3-Methyl-1-(2,4,6-trihydroxyphenyl)-1-butanone	C11H14O4	8.66372	209.082	209.082	39.1	neg	M-H	0.621187	441269	VSDWHZGJGWMIRN-UHFFFAOYSA-N	CC(C)CC(=O)C1=C(C=C(C=C1O)O)O	2.4	Organic oxygen compounds	Organooxygen compounds	Carbonyl compounds	209.0814 3076233.1875|125.0243 554902.2891|66.0349 481456.9785|151.0037 259313.2188|124.0391 237954.0781	242624
4.63_303.0625m/z	7-Aminocephalosporanic acid	C10H12N2O5S	4.62785	303.063	303.065	46	neg	M-H+CH3OH	-9.46503	441328	HSHGZXNAXBPPDL-HZGVNTEJSA-N	CC(=O)OCC1=C(N2C(C(C2=O)N)SC1)C(=O)O	-4	Organic acids and derivatives	Carboxylic acids and derivatives	Amino acids, peptides, and analogues	144.0454 428392.5664|231.0401 300846.4395|259.0713 236503.7793|187.0512 177117.7813|59.0138 160030.3906	113049
0.81_371.1200m/z	Neohesperidose	C12H22O10	0.814067	371.12	371.119	83.2	neg	M+HCOO	1.47401	441426	VSRVRBXGIRFARR-OUEGHFHCSA-N	CC1C(C(C(C(O1)OC2C(C(C(OC2O)CO)O)O)O)O)O	-3.7	Organic oxygen compounds	Organooxygen compounds	Carbohydrates and carbohydrate conjugates	191.0562 23603241.2500|85.0295 1417828.0000|93.0343 541509.1250|127.0396 335667.1563|87.0086 289992.2813	4.17067e+06
1.14_292.1401m/z	Lotaustralin	C11H19NO6	1.13612	292.14	292.14	73.7	neg	M-H+CH3OH	1.64661	441467	WEWBWVMTOYUPHH-QHAQEBJBSA-N	CCC(C)(C#N)OC1C(C(C(C(O1)CO)O)O)O	-1.1	Organic oxygen compounds	Organooxygen compounds	Carbohydrates and carbohydrate conjugates	130.0872 21101277.2500|96.9600 2026426.1250|101.0244 1670200.0742|202.1086 1601501.4375|172.0979 1157061.1328	4.56283e+06
11.14_313.1441m/z	Juncuenin D	C18H18O3	11.1445	313.144	313.144	85.6	neg	M-H+CH3OH	0.318472	44178856	YMHWAVLJEDKKGD-UHFFFAOYSA-N	CC1=C(C=CC2=C1CCC3(C2=CC(=O)C(=C3C=C)C)O)O	2.1	Lipids and lipid-like molecules	Steroids and steroid derivatives	Oxosteroids	313.1436 47720275.2500|283.1332 12210697.0547|255.1391 10246364.8672|295.1327 4338098.1665|285.1483 3481342.9492	1.67029e+07
8.65_639.3073m/z	Helveticoside	C29H42O9	8.652	639.307	639.301	45.5	neg	M+CH3COOH+HCOO	9.66763	441860	QBILRDAMJUPXCX-AGAUEGNUSA-N	CC1C(C(CC(O1)OC2CCC3(C4CCC5(C(CCC5(C4CCC3(C2)O)O)C6=CC(=O)OC6)C)C=O)O)O	0.3	Lipids and lipid-like molecules	Steroids and steroid derivatives	Steroid lactones	333.2069 1853216.7500|57.0345 392995.9424|125.0244 321345.4023|99.0451 264478.2500|375.2193 156790.3926	428497
9.71_455.3154m/z	Gitogenin	C27H44O4	9.70787	455.315	455.313	42.2	pos	M+Na	5.20774	441887	FWCXELAAYFYCSR-RYKNUXCGSA-N	CC1CCC2(C(C3C(O2)CC4C3(CCC5C4CCC6C5(CC(C(C6)O)O)C)C)C)OC1	5.5	Lipids and lipid-like molecules	Prenol lipids	Triterpenoids	455.3278 165320.4883|95.0859 98384.5547|119.0857 98169.0869|107.0857 92653.7422|81.0704 86382.0703	108036
8.11_329.1021m/z	Cimifugin	C16H18O6	8.10547	329.102	329.099	72.5	pos	M+Na	8.22115	441960	ATDBDSBKYKMRGZ-ZDUSSCGKSA-N	CC(C)(C1CC2=C(O1)C=C3C(=C2OC)C(=O)C=C(O3)CO)O	0.6	Organoheterocyclic compounds	Benzopyrans	1-benzopyrans	329.1011 2562423.4063|314.0784 1220590.0938|286.0834 434589.5000|271.0601 264034.4727|285.0753 201672.7500	221795
8.73_361.2024m/z	Carnosol	C20H26O4	8.72885	361.202	361.201	71.6	neg	M-H+CH3OH	2.61766	442009	XUSYGBPHQBWGAD-PJSUUKDQSA-N	CC(C)C1=C(C(=C2C(=C1)C3CC4C2(CCCC4(C)C)C(=O)O3)O)O	4.4	Lipids and lipid-like molecules	Prenol lipids	Terpene lactones	361.2016 8698186.0000|285.1854 2054885.5781|317.2121 766361.2266|283.1690 144716.8848|325.2068 113880.1328	4.71934e+06
7.92_263.1287m/z	Florilenalin	C15H20O4	7.9241	263.129	263.129	72	neg	M-H	-0.8567	442243	RBLYUGWIFLXCPD-VZGVWICMSA-N	CC1(CC(C2C1CC3C(CC2=C)OC(=O)C3=C)O)O	0.9	Lipids and lipid-like molecules	Prenol lipids	Terpene lactones	263.1287 1085429.4688|219.1404 301999.8789|201.1284 171240.6924|262.1118 106974.1094|218.1260 90767.9473	1.02825e+06
6.99_249.1486m/z	Micheliolide	C15H20O3	6.98807	249.149	249.149	81	pos	M+H	0.315334	442279	RDJAFOWISVMOJY-PWNZVWSESA-N	CC1=C2CCC(C2C3C(CC1)C(=C)C(=O)O3)(C)O	1.3	Organoheterocyclic compounds	Lactones	Gamma butyrolactones	249.0767 10968303.0000|249.1488 6501998.4375|203.0706 2994117.1875|175.0756 1703484.3594|161.0602 1373285.7500	2.1884e+06
6.28_225.0768m/z	Genipin	C11H14O5	6.28238	225.077	225.077	63.75	neg	[M-H]-	-0.103146	442424	AZKVWQKMDGGDSV-BCMRRPTOSA-N	COC(=O)C1=COC(C2C1CC=C2CO)O	-0.7	Lipids and lipid-like molecules	Prenol lipids	Monoterpenoids	207.0659 304767.7422|163.0737 251835.9395|180.0719 228144.2500|225.0711 219471.4365|153.0920 187830.8643	42845.5
7.03_563.1764m/z	Naringin	C27H32O14	7.03272	563.176	563.176	38.2	pos	M+H-H2O	0.890785	442428	DFPMSGMNTNDNHN-ZPHOTFPESA-N	CC1C(C(C(C(O1)OC2C(C(C(OC2OC3=CC(=C4C(=O)CC(OC4=C3)C5=CC=C(C=C5)O)O)CO)O)O)O)O)O	-0.5	Phenylpropanoids and polyketides	Flavonoids	Flavonoid glycosides	417.1182 1131998.2656|313.0709 576157.9297|337.0707 547774.1641|381.0970 545237.4453|283.0601 448062.8906	279302
6.75_891.1748m/z	Paederoside	C18H22O11S	6.75387	891.175	891.169	47	neg	2M-H	6.15492	442432	OJISWUQNQQWEND-FCVLBCLDSA-N	CSC(=O)OCC1=CC2C3C1C(OC=C3C(=O)O2)OC4C(C(C(C(O4)CO)O)O)O	-1.5	Organic oxygen compounds	Organooxygen compounds	Carbohydrates and carbohydrate conjugates	269.0444 11225122.3750|113.0243 1673204.2813|445.0769 1440394.5313|175.0245 773645.5176|85.0294 685887.8242	411697
6.13_339.1076m/z	Swertiamarin	C16H22O10	6.12893	339.108	339.107	59.8	pos	M+H-2H2O	0.512607	442435	HEYZWPRKKUGDCR-QBXMEVCASA-N	C=CC1C(OC=C2C1(CCOC2=O)O)OC3C(C(C(C(O3)CO)O)O)O	-2	Organic oxygen compounds	Organooxygen compounds	Carbohydrates and carbohydrate conjugates	177.0545 4707097.2188|145.0284 1782544.3828|117.0337 498412.7168|149.0597 220747.6563|131.0490 156742.5518	293795
7.73_443.0988m/z	Ochratoxin A	C20H18ClNO6	7.73205	443.099	443.101	38	neg	M-H+CH3CN	-5.40437	442530	RWQKHEORZBHNRI-BMIGLBTASA-N	CC1CC2=C(C=C(C(=C2C(=O)O1)O)C(=O)NC(CC3=CC=CC=C3)C(=O)O)Cl	4.7	Phenylpropanoids and polyketides	Ochratoxins and related substances		399.1082 1497365.8594|309.0405 722074.3594|298.0480 663814.5625|297.0400 561540.8125|311.0558 524518.5000	806961
3.74_210.0772m/z	Gentioflavin	C10H11NO3	3.7424	210.077	210.077	46.3	neg	M-H+H2O	2.98256	442536	GLNRAZLQBMAROT-UHFFFAOYSA-N	CC1C(=C2CCOC(=O)C2=CN1)C=O	-0.1	Organoheterocyclic compounds	Lactones	Delta valerolactones	124.0403 764020.3945|94.0298 358922.2344|59.0138 205832.7407|151.0616 199059.5781|166.0861 182683.1875	45068.5
6.79_531.1508m/z	Dalbinol	C23H22O8	6.79183	531.151	531.151	59	neg	M+CH3COOH+HCOO	0.0172562	44257412	MYQAATJJIDGOMQ-UHFFFAOYSA-N	COC1=C(C=C2C(=C1)C3(C(CO2)OC4=C(C3=O)C=CC5=C4CC(O5)C(=C)CO)O)OC	2.1	Phenylpropanoids and polyketides	Isoflavonoids	Rotenoids	191.0563 9677066.1016|173.0457 6284189.3438|93.0346 3130635.4766|133.0295 2550989.7813|339.0883 2229528.6250	1.8172e+06
6.79_739.2165m/z	Apigenin 7-O-(2G-rhamnosyl)gentiobioside	C33H40O19	6.79183	739.216	739.209	69.6	neg	M-H	9.93766	44257850	LXOPDILLGIDKLW-IQQUXTKISA-N	CC1C(C(C(C(O1)OC2C(C(C(OC2OC3=CC(=C4C(=C3)OC(=CC4=O)C5=CC=C(C=C5)O)O)COC6C(C(C(C(O6)CO)O)O)O)O)O)O)O)O	-2.4	Phenylpropanoids and polyketides	Flavonoids	Flavonoid glycosides	151.0036 1545889.6875|301.0717 1463414.4219|595.1687 1235974.2344|164.0115 493890.1953|134.0371 491181.6641	1.94823e+06
7.45_607.1690m/z	Rhamnocitrin 3-rutinoside	C28H32O15	7.44977	607.169	607.167	74.7	neg	M-H	3.61579	44259547	SHEMZXKUXGNYPP-QJIDSCQVSA-N	CC1C(C(C(C(O1)OCC2C(C(C(C(O2)OC3=C(OC4=CC(=CC(=C4C3=O)O)OC)C5=CC=C(C=C5)O)O)O)O)O)O)O	-0.6	Phenylpropanoids and polyketides	Flavonoids	Flavonoid glycosides	313.0711 328851.0195|298.0479 235767.3555|255.0296 84183.7598|283.0239 74458.2090|270.0568 15692.8281	200253
6.14_463.1240m/z	Swertiajaponin	C22H22O11	6.14113	463.124	463.123	59.3	pos	M+H	1.00776	442659	DLVLXOYLQKCAME-DGHBBABESA-N	COC1=C(C(=C2C(=C1)OC(=CC2=O)C3=CC(=C(C=C3)O)O)O)C4C(C(C(C(O4)CO)O)O)O	0.2	Phenylpropanoids and polyketides	Flavonoids	Flavonoid glycosides	313.0708 1442980.2090|343.0811 1077847.9609|367.0815 611347.1250|427.1025 396474.6602|131.0493 378913.4121	423097
5.29_593.1532m/z	Vicenin II	C27H30O15	5.2918	593.153	593.151	73.7	neg	M-H	3.37675	442664	FIAAVMJLAGNUKW-VQVVXJKKSA-N	C1=CC(=CC=C1C2=CC(=O)C3=C(C(=C(C(=C3O2)C4C(C(C(C(O4)CO)O)O)O)O)C5C(C(C(C(O5)CO)O)O)O)O)O	-2.3	Phenylpropanoids and polyketides	Flavonoids	Flavonoid glycosides	209.9195 26632.0352|353.0650 25755.6602|593.1532 24439.8008|383.0738 12858.2246|297.0746 12653.9072	317206
5.38_469.1150m/z	Cinchonain Ia	C24H20O9	5.377	469.115	469.113	65.4	neg	M-H+H2O	3.38777	442675	LKCOZWLUAKSRQM-UMAWSMADSA-N	C1C(C(OC2=C1C(=CC3=C2C(CC(=O)O3)C4=CC(=C(C=C4)O)O)O)C5=CC(=C(C=C5)O)O)O	2.2	Phenylpropanoids and polyketides	Flavonoids	Flavans	289.0712 987445.6875|135.0452 322469.2793|315.0862 267592.7188|109.0293 206226.6875|137.0245 137522.3477	158609
6.96_492.1272n	Aurantio-obtusin Beta-D-glucoside	C23H24O12	6.95662	493.134	493.134	84.3	pos	M+H, M+CH3OH+Na	0.842593	442725	LQYQYAJWKXDTHR-PHVGODQESA-N	CC1=CC2=C(C(=C1O)OC)C(=O)C3=C(C(=C(C=C3C2=O)OC4C(C(C(C(O4)CO)O)O)O)OC)O	0.9	Benzenoids	Anthracenes	Anthraquinones	331.0811 4804247.4063|316.0576 1402553.7031|301.0342 330366.4395|315.0490 255201.8125|167.0343 169556.6328	1.10741e+06
5.03_246.0982m/z	Heliotridine	C8H13NO2	5.02793	246.098	246.098	51.1	neg	M+HCOOH+HCOO	-0.901363	442736	HJSJELVDQOXCHO-JGVFFNPUSA-N	C1CN2CC=C(C2C1O)CO	-1.3	Alkaloids and derivatives			210.0773 908907.1719|130.0873 808155.1621|109.0168 503165.9688|228.0879 450527.3516|166.0875 223483.9863	413636
1.91_456.1878m/z	Jacobine	C18H25NO6	1.91467	456.188	456.187	43.6	neg	M+CH3COOH+HCOO	1.00583	442741	IAPHXJRHXBQDQJ-WKMWQDDRSA-N	CC1CC2(C(O2)C)C(=O)OC3CCN4C3C(=CC4)COC(=O)C1(C)O	0.3	Alkaloids and derivatives			164.0717 1555329.7031|147.0451 461020.6230|72.0091 116170.7109|103.0554 96981.5674|78.9591 70543.1909	123603
9.80_293.1756m/z	6-Gingerol	C17H26O4	9.8044	293.176	293.176	88.9	neg	M-H	-0.712911	442793	NLDDIKRKFXEWBK-AWEZNQCLSA-N	CCCCCC(CC(=O)CCC1=CC(=C(C=C1)O)OC)O	2.5	Benzenoids	Phenols	Methoxyphenols	221.1543 1978426.5156|236.1052 1331338.8125|220.1468 755092.6250|115.0400 293818.7471|192.1154 127916.4570	455835
7.55_447.1288m/z	Trifolirhizin	C22H22O10	7.55275	447.129	447.128	80.46	pos	[M+H]+	0.478358	442827	VGSYCWGXBYZLLE-QEEQPWONSA-N	C1C2C(C3=C(O1)C=C(C=C3)OC4C(C(C(C(O4)CO)O)O)O)OC5=CC6=C(C=C25)OCO6	0.6	Phenylpropanoids and polyketides	Isoflavonoids	Furanoisoflavonoids	285.0757 4842959.4688|271.0594 835234.6094|270.0522 492142.2500|242.0573 491224.0703|447.1270 465367.0938	1.16196e+06
5.43_250.0720m/z	Swietenidine B	C11H11NO3	5.42793	250.072	250.072	36.2	neg	M+HCOO	-0.402041	442933	SZUBEJQEEOURQH-UHFFFAOYSA-N	COC1=C(C(=O)NC2=CC=CC=C21)OC	1.2	Organoheterocyclic compounds	Quinolines and derivatives	Quinolones and derivatives	132.0302 1504070.1797|88.0404 1066412.3633|250.0729 545980.7500|249.0785 259025.3125|206.0839 205269.2500	352066
7.97_199.1341m/z	Linalool	C10H18O	7.97377	199.134	199.134	46.2	neg	M+HCOO	0.836627	443158	CDOSHBSSFJOMGT-JTQLQIEISA-N	CC(=CCCC(C)(C=C)O)C	2.7	Lipids and lipid-like molecules	Prenol lipids	Monoterpenoids	199.1336 19390328.7500|181.1228 805991.5000|197.1182 418776.8750|155.1089 323813.0313|127.1128 308602.6563	910970
3.92_172.0969m/z	C4-homoserine lactone	C8H13NO3	3.91777	172.097	172.097	90	pos	[M+H]+	0.330674	443433	VFFNZZXXTGXBOG-UHFFFAOYSA-N	CCCC(=O)NC1CCOC1=O	0.5	Organic acids and derivatives	Carboxylic acids and derivatives	Amino acids, peptides, and analogues	130.0862 332876.6523|74.0242 204287.8203|72.0814 193991.6272|70.0657 157726.1406|84.0812 131874.9219	148701
2.70_218.1035m/z	Calcium pantothenate	C18H32CaN2O10	2.69583	218.103	218.103	86.5	neg	M+?	-0.198104	443753	FAPWYRCQGJNNSJ-UBKPKTQASA-L	CC(C)(CO)C(C(=O)NCCC(=O)[O-])O.CC(C)(CO)C(C(=O)NCCC(=O)[O-])O.[Ca+2]		Organic acids and derivatives	Carboxylic acids and derivatives	Amino acids, peptides, and analogues	88.0404 5515888.8569|146.0822 3149313.0024|218.1034 2662468.8457|71.0502 862294.1240|71.0139 566353.8025	3.64677e+06
8.18_383.0779m/z	Rabelomycin	C19H14O6	8.17805	383.078	383.077	62	neg	M+HCOO	2.01581	443810	JJOLHRYZQSDLSA-LJQANCHMSA-N	CC1(CC2=CC(=C3C(=C2C(=O)C1)C(=O)C4=C(C3=O)C(=CC=C4)O)O)O	2	Phenylpropanoids and polyketides	Angucyclines		383.0761 681131.2773|324.0642 397050.6177|281.0451 349543.6162|309.0404 248104.9702|297.0406 192234.5171	901003
6.96_343.0467m/z	Coccineone B	C16H10O6	6.95717	343.047	343.046	37.8	neg	M+HCOO	2.40554	44420939	HMCJSHNAURZDNI-UHFFFAOYSA-N	C1=CC=C2C(=C1)C3=C(C(O2)O)OC4=CC(=CC(=C4C3=O)O)O	2	Phenylpropanoids and polyketides	Isoflavonoids	Rotenoids	299.0542 3863030.4375|150.0322 1253564.2500|145.0294 1092638.0859|135.0452 931039.8828|151.0391 917523.5469	260450
11.05_499.3065m/z	antcin A	C29H42O4	11.0456	499.306	499.307	90.7	neg	M+HCOO	-0.103085	44424392	WTSUWKBKPMVEBO-QNMMDLTMSA-N	CC1C2CCC3=C(C2(CCC1=O)C)C(=O)CC4(C3CCC4C(C)CCC(=C)C(C)C(=O)O)C	6.2	Lipids and lipid-like molecules	Steroids and steroid derivatives	Ergostane steroids	499.3066 822366.7344|481.2955 104954.8926|407.2967 60061.4602|451.2909 39855.0000|61.9882 27757.1484	147290
0.91_133.0142m/z	Maleic acid	C4H4O4	0.91465	133.014	133.014	88.9	neg	M-H+H2O	4.55317	444266	VZCYOOQTPOCHFL-UPHRSURJSA-N	C(=CC(=O)O)C(=O)O	-0.3	Organic acids and derivatives	Carboxylic acids and derivatives	Dicarboxylic acids and derivatives	115.0036 45545988.0313|71.0138 22056462.1084|133.0142 15389732.7656|72.9931 5739117.0508|89.0246 3610787.2002	7.677e+07
4.47_505.1567m/z	Cistanoside F	C21H28O13	4.47238	505.157	505.156	49.8	neg	M-H+H2O	2.10086	44429870	IDVRYIVYDAOHSS-CRADLMAESA-N	C[C@H]1[C@@H]([C@H]([C@H]([C@@H](O1)O[C@H]([C@H](C=O)O)[C@@H]([C@@H](CO)O)OC(=O)/C=C/C2=CC(=C(C=C2)O)O)O)O)O	-2.3				181.0506 1774979.5391|343.1040 923322.9063|137.0608 528858.6797|59.0138 162881.7969|135.0450 124681.3247	194189
8.01_221.0819m/z	2-Hydroxy-3-phenoxypropyl prop-2-enoate	C12H14O4	8.01323	221.082	221.082	80.89	neg	[M-H]-	-0.329879	4443516	HHQAGBQXOWLTLL-UHFFFAOYSA-N	C=CC(=O)OCC(COC1=CC=CC=C1)O	1.8				177.0922 6973288.9063|221.0815 4994629.1641|59.0139 2043910.1328|134.0376 1956869.0879|122.0373 842850.2559	6.85274e+06
8.80_218.1304n	Evofolin C	C14H18O2	8.80002	263.129	263.129	61.3	neg	M-H+CH3OH, M+HCOO	-1.16856	44445795	ROCWIPIJKMWFFA-ONEGZZNKSA-N	CC(=CCOC1=CC=C(C=C1)C=CCO)C	3.1	Phenylpropanoids and polyketides	Cinnamyl alcohols		263.1278 1612056.4036|219.1397 1345282.4766|262.1115 136584.0898|99.0451 125217.4746|201.1279 101735.5898	2.08977e+06
6.34_149.0598m/z	Cinnamic acid	C9H8O2	6.33598	149.06	149.06	73.5	pos	M+H	0.615451	444539	WBYWAXJHAXSJNI-VOTSOKGWSA-N	C1=CC=C(C=C1)C=CC(=O)O	2.1	Phenylpropanoids and polyketides	Cinnamic acids and derivatives	Cinnamic acids	149.0238 3161131.1563|121.0260 788867.0781|121.1014 575571.0742|149.0610 519547.5195|65.0393 424960.1836	38155.4
10.12_301.2162m/z	Retinoic acid	C20H28O2	10.1166	301.216	301.214	92.69	pos	[M+H]+	8.67302	444795	SHGAZHPCJJPHSC-YCNIQYBTSA-N	CC1=C(C(CCC1)(C)C)C=CC(=CC=CC(=CC(=O)O)C)C	6.3	Lipids and lipid-like molecules	Prenol lipids	Retinoids	301.2112 400858.7969|301.0689 276558.9561|255.2127 183266.0928|88.0762 173192.6094|119.0858 154269.8801	605678
9.85_227.0714m/z	Resveratrol	C14H12O3	9.84887	227.071	227.071	80.97	neg	[M-H]-	0.266694	445154	LUKBXSAWLPMMSZ-OWOJBTEDSA-N	C1=CC(=CC=C1C=CC2=CC(=CC(=C2)O)O)O	3.1	Phenylpropanoids and polyketides	Stilbenes		92.0268 1289436.9453|227.0678 652829.4531|136.0165 174626.7715|183.1399 69759.6455|183.0817 69318.1875	51928.8
8.77_343.2131m/z	Ustusol C	C16H28O4	8.77277	343.213	343.212	44.1	neg	M+CH3COO	1.9839	44557563	ZPHNAEGQIWXWGS-BFJAYTPKSA-N	CC1(CCCC2(C1C(C=C(C2(CO)O)CO)OC)C)C	1.4	Organic oxygen compounds	Organooxygen compounds	Alcohols and polyols	343.2204 2201328.2500|59.0138 1112899.8438|265.1810 789235.9141|281.2123 364345.9648|96.9600 279095.6250	771589
4.61_439.1063m/z	Gericudranin E	C22H18O7	4.61287	439.106	439.103	46.7	neg	M+HCOO	7.30651	44559902	SFDDCVYUBBUSMV-FCHUYYIVSA-N	C1=CC(=CC=C1CC2=C(C3=C(C=C2O)OC(C(C3=O)O)C4=CC=C(C=C4)O)O)O	3.4	Phenylpropanoids and polyketides	Diarylheptanoids	Linear diarylheptanoids	439.1053 10478197.7500|217.0525 5997680.0625|203.0351 1951268.7500|199.0418 1305357.2500|93.0347 1243711.6094	1.50705e+06
13.85_253.2172m/z	(Z)-Hexadec-9-enoic acid	C16H30O2	13.8521	253.217	253.217	53.8	neg	[M-H]-	-0.418946	445638	SECPZKHBENQXJG-FPLPWBNLSA-N	CCCCCCC=CCCCCCCCC(=O)O	6.4	Lipids and lipid-like molecules	Fatty Acyls	Fatty acids and conjugates	253.2167 615173.6738|59.0137 130055.8281|193.0721 36631.7891|191.0551 31496.4150|61.9887 22815.5859	510432
7.04_509.1093m/z	Isosalvianolic acid C	C26H20O10	7.03613	509.109	509.108	78.2	neg	M-H+H2O	1.88106	44566967	AVGRZVZQTALJJF-VURDRKPISA-N	C1=CC(=C(C=C1CC(C(=O)O)OC(=O)C=CC2=C3C=CC4=CC(=C(C=C4OC3=C(C=C2)O)O)O)O)O	4	Organoheterocyclic compounds	Benzoxepines	Dibenzoxepines	311.0559 1642568.0469|135.0451 1107273.2500|157.0295 688033.2031|267.0658 559994.4648|201.0191 502212.3672	560791
8.14_237.1134m/z	6-Hydroxy-7-methoxydihydroligustilide	C13H18O4	8.13955	237.113	237.113	53	neg	M-H	0.554914	44575249	XJEUNELMMQEXLN-YHYXMXQVSA-N	CCCC=C1C2=C(C(C(CC2)O)OC)C(=O)O1	1.1	Organoheterocyclic compounds	Isobenzofurans		193.0847 1354543.0078|193.1224 462323.0195|108.0217 375606.0938|237.0732 323525.5938|237.1145 323084.6875	120751
7.40_273.0768m/z	4,9-Dihydroxy-alpha-lapachone	C15H14O5	7.39825	273.077	273.077	37.8	neg	M-H	-0.274385	44575422	KGIQEUTUJPXAKQ-VIFPVBQESA-N	CC1(CC(C2=C(O1)C(=O)C3=C(C2=O)C=CC=C3O)O)C	1.7	Organoheterocyclic compounds	Naphthopyrans	Naphthopyranones	258.0534 1397554.4375|273.0796 1216792.7344|211.1340 971422.5781|243.0309 688607.8047|255.1224 653244.0781	114968
1.27_319.1039m/z	Borreriagenin	C10H14O5	1.26688	319.104	319.103	45.1	neg	M+CH3COOH+HCOO	2.09849	44583980	MOUZVDVFZGJOOS-XGEHTFHBSA-N	C1=C(C(C2C1OC(=O)C2CO)CO)CO	-1.5	Organoheterocyclic compounds	Lactones	Gamma butyrolactones	319.1046 3961291.4688|71.0139 1794727.0117|59.0138 1313169.7500|101.0244 1142030.2500|85.0296 860733.6426	703096
5.79_457.0783m/z	Kaempferol 3,4',7-triacetate	C21H16O9	5.79102	457.078	457.078	58.4	neg	M+HCOO	1.70628	44584293	DJKUFDVJACBQPB-UHFFFAOYSA-N	CC(=O)OC1=CC=C(C=C1)C2=C(C(=O)C3=C(C=C(C=C3O2)OC(=O)C)O)OC(=O)C	2.8	Phenylpropanoids and polyketides	Flavonoids	Flavones	163.0401 666686.1680|135.0451 583067.7305|179.0349 316029.2051|119.0502 295060.6230|295.0455 243341.2715	292304
5.01_177.0547m/z	Ferulic acid	C10H10O4	5.00895	177.055	177.055	86.5	pos	M+H-H2O	0.646304	445858	KSEBMYQBYZTDHS-HWKANZROSA-N	COC1=C(C=CC(=C1)C=CC(=O)O)O	1.5	Phenylpropanoids and polyketides	Cinnamic acids and derivatives	Hydroxycinnamic acids and derivatives	145.0284 20235640.2500|117.0338 12068971.2083|177.0548 7835980.6198|89.0391 5373797.6979|149.0598 4382244.5000	1.08407e+06
10.47_397.2605m/z	7-Hydroxydarutigenol	C20H34O4	10.4748	397.26	397.259	64.3	neg	M+CH3COO	2.80894	44606934	BIPACBIPISLDRK-IFWNTPBBSA-N	CC1(C(CCC2(C1CC(C3=CC(CCC32)(C)C(CO)O)O)C)O)C	1.9	Lipids and lipid-like molecules	Prenol lipids	Diterpenoids	199.1340 239590.3926|61.9883 205047.1094|267.1960 169820.6016|255.1593 148699.1836|397.2687 132430.4531	142532
9.82_273.1849m/z	?-Estradiol	C18H24O2	9.81918	273.185	273.183	97.17	pos	[M+H]+	8.30795	450	VOXZDWNPVJITMN-UHFFFAOYSA-N	CC12CCC3C(C1CCC2O)CCC4=C3C=CC(=C4)O	4	Lipids and lipid-like molecules	Steroids and steroid derivatives	Estrane steroids	273.1879 424803.5313|105.0702 162910.4688|131.0853 118218.5625|106.0870 108171.8027|88.0761 101808.5156	196639
4.75_368.0995m/z	Bergenin (Vakerin	C14H16O9	4.74668	368.099	368.098	43.4	neg	M-H+CH3CN	4.13806	45033589	YWJXCIXBAKGUKZ-YRWSHXIOSA-N	COC1=C(C=C2C(=C1O)C3C(C(C(C(O3)CO)O)O)OC2=O)O	-1	Benzenoids	Benzene and substituted derivatives	Benzoic acids and derivatives	162.0560 1988495.3125|206.0457 1288555.5000|368.1011 511479.5313|192.0888 340452.7207|207.0510 296202.3438	171444
4.87_575.2372m/z	Scutebarbatine A	C32H34N2O7	4.86515	575.237	575.239	88.8	neg	M-H+H2O	-3.84321	45110781	CFCKNUOZCOKYOO-JUJIBZTHSA-N	CC1=CCCC2C1(C(C(C(C2(C)C=CC3=CC(=O)OC3)(C)O)OC(=O)C4=CN=CC=C4)OC(=O)C5=CN=CC=C5)C	3.6	Lipids and lipid-like molecules	Prenol lipids	Terpene lactones	575.2404 334491.3125|59.0144 200159.3281|71.0153 159322.8594|446.1472 119348.0547|55.8200 102212.2266	4.69953e+06
11.17_595.2911m/z	Lysofungin	C27H49O12P	11.1731	595.291	595.289	56	neg	M-H	3.67302	45359145	SAHCQBPGXQFTRA-ZOEHVZSMSA-N	CCCCCC=CCC=CCCCCCCCC(=O)OCC(COP(=O)(O)OC1C(C(C(C(C1O)O)O)O)O)O	1.8	Lipids and lipid-like molecules	Glycerophospholipids	Glycerophosphoinositols	78.9591 40623.7786|279.2311 38412.2910|152.9956 37866.5039|595.2858 25910.6720|241.0083 19853.6374	1.96426e+06
9.36_431.2558m/z	Radiclonic acid	C23H40O5	9.36448	431.256	431.257	53.8	neg	M+Cl	-2.97227	45359249	NNPPLRJHBQPBAQ-UKRBZAIKSA-N	CCC(C)CC(C)CC(CC(C)C=C(C)C=C(CC(C)C(=O)O)C(=O)O)CO	5.9	Lipids and lipid-like molecules	Prenol lipids	Diterpenoids	431.2584 787642.0781|387.2668 391134.6563|344.2599 174174.3574|61.9883 73716.4297|369.2586 64126.3008	115128
5.01_504.1837n	Cordifolioside A	C22H32O13	5.01453	503.176	503.177	46	neg	M-H, M+CH3COO, M+Cl	-1.15312	45359937	LPFQFJKAHSGCFJ-LJIKAXRCSA-N	COC1=CC(=CC(=C1OC2C(C(C(C(O2)CO)O)OC3C(C(CO3)(CO)O)O)O)OC)C=CCO	-1.8	Organic oxygen compounds	Organooxygen compounds	Carbohydrates and carbohydrate conjugates	209.0819 2312598.3281|503.1762 2103726.5313|194.0583 1206146.7813|179.0350 829489.5664|161.0233 579506.4883	1.39294e+07
7.46_657.3178m/z	Periplogenin glucoside	C29H44O10	7.46208	657.318	657.312	48.5	neg	M+CH3COOH+HCOO	9.17123	45360094	FECZMYDDHKVQIA-MHLHJPRMSA-N	CC12CCC(CC1(CCC3C2CCC4(C3(CCC4C5=CC(=O)OC5)O)C)O)OC6C(C(C(C(O6)CO)O)O)O	-0.4	Lipids and lipid-like molecules	Steroids and steroid derivatives	Steroid lactones	657.3160 771512.1250|319.2275 486069.6992|113.0242 379851.5107|85.0293 343387.6973|75.0086 329263.9063	461017
2.40_629.1773m/z	Seguinoside F	C26H32O15	2.40212	629.177	629.172	92.8	neg	M+HCOO	8.45688	45360160	HZFQJXUVAZJXLJ-BBJWLDLUSA-N	COC1=CC(=CC(=C1O)OC)C(=O)OCC2(COC(C2O)OC3C(C(C(OC3OC4=CC=C(C=C4)O)CO)O)O)O	-0.5	Phenylpropanoids and polyketides	Tannins	Hydrolyzable tannins	197.0456 285492.4375|137.0243 245696.1182|135.0450 171063.3516|72.9931 158915.5156|431.1195 146413.9023	264487
5.41_325.0933m/z	Secodihydro-hydramicromelin B	C15H18O8	5.41458	325.093	325.093	56.7	neg	M-H	1.19028	45360164	BNLUQONOBPMVBG-UHFFFAOYSA-N	CC1(C(C(OC1=O)C2=C(C=C(C(=C2)CCC(=O)O)O)OC)O)O	-0.3	Organoheterocyclic compounds	Diazanaphthalenes	Naphthyridines	193.0506 347547.7441|134.0371 269761.6563|289.0712 253110.5469|116.0716 170538.6406|59.0138 146795.9688	80540.1
0.67_276.9820m/z	alpha-Terthienylmethanol	C13H10OS3	0.670383	276.982	276.982	43.5	neg	M-H	-0.512618	454740	WAYZWWNNJZMQCQ-UHFFFAOYSA-N	C1=CSC(=C1)C2=CC=C(S2)C3=CC=C(S3)CO	3.5	Organoheterocyclic compounds	Bi- and oligothiophenes		134.9705 1255974.7891|276.9815 924074.9375|176.9812 383111.4102|234.9647 59008.3564|90.9805 28088.2012	118565
8.83_299.1291m/z	Diofenolan	C18H20O4	8.8312	299.129	299.129	94.93	neg	[M-H]-	0.646324	4578030	ZDOOQPFIGYHZFV-UHFFFAOYSA-N	CCC1OCC(O1)COC2=CC=C(C=C2)OC3=CC=CC=C3	4	Benzenoids	Benzene and substituted derivatives	Diphenylethers	211.1488 1138802.9688|269.0447 973249.6484|139.1126 952582.5039|255.1387 813505.7344|284.0775 521540.3438	194981
2.90_169.0508m/z	Guaiacol	C7H8O2	2.9031	169.051	169.051	46.2	neg	M+HCOO	1.51059	460	LHGVFZTZFXWLCP-UHFFFAOYSA-N	COC1=CC=CC=C1O	1.3	Benzenoids	Phenols	Methoxyphenols	168.0385 1993862.3242|124.0487 1382790.7188|154.0270 513937.9922|125.0217 425304.1035|169.0111 390461.8379	71143.5
6.10_669.2569m/z	Kanokoside D	C27H44O16	6.09815	669.257	669.261	71.8	neg	M+HCOO	-6.83281	46173908	AKTRFOPOAKDICT-GHHIWPQQSA-N	CC(C)CC(=O)OC1C2C(CC(C2CO)O)C(=CO1)COC3C(C(C(C(O3)COC4C(C(C(C(O4)CO)O)O)O)O)O)O	-3.3	Lipids and lipid-like molecules	Prenol lipids	Terpene glycosides	323.0982 771188.2148|59.0137 537514.8750|149.0455 534636.0928|281.0871 533198.3398|89.0244 511291.8438	248159
9.75_251.1652m/z	13-Hydroxygermacrone	C15H22O2	9.75028	251.165	251.165	75.8	neg	M-H+H2O	2.1969	46173921	OYONKNQJEXRUQZ-AMEYMCPOSA-N	CC1=CCC(=C(C)CO)C(=O)CC(=CCC1)C	2.2	Lipids and lipid-like molecules	Prenol lipids	Sesquiterpenoids	251.1655 3113054.0938|250.1517 150558.8750|207.1762 92269.0469|233.1554 63396.0391|59.0139 59611.9648	192304
7.81_613.2339m/z	Lappaol C	C30H34O10	7.81347	613.234	613.228	72.2	neg	M+CH3COO	8.86919	46173978	BWOAMGHNXHLWMX-BAOMQRJLSA-N	COC1=CC(=CC(=C1O)C(CO)C(C2=CC(=C(C=C2)O)OC)O)CC3COC(=O)C3CC4=CC(=C(C=C4)O)OC	3.1	Lignans, neolignans and related compounds	Furanoid lignans	Tetrahydrofuran lignans	150.0320 235049.4180|165.0567 200076.5498|195.0656 164891.5693|165.0206 138677.2578|180.0428 59657.9453	195186
10.30_333.2073m/z	9,13-Epidioxy-8(14)-abieten-18-oic acid	C20H30O4	10.301	333.207	333.207	82.9	neg	M-H	0.58444	46230362	OOHFJWCHEFCJDC-ZMHJYQQXSA-N	CC(C)C12CCC3(C(=C1)CCC4C3(CCCC4(C)C(=O)O)C)OO2	3.8	Organoheterocyclic compounds	Dioxanes	1,2-dioxanes	333.2069 62454650.0000|332.1911 411467.8438|209.9260 324209.9375|289.2159 191913.1875|95.5669 129371.4688	5.86443e+06
5.53_153.0195m/z	PATULIN	C7H6O4	5.52637	153.019	153.019	55.3	neg	M-H	0.920123	4696	ZRWPUFFVAOMMNM-UHFFFAOYSA-N	C1C=C2C(=CC(=O)O2)C(O1)O	-1	Organoheterocyclic compounds	Pyrans		153.0193 5043779.7813|109.0293 4954509.5000|135.0088 1286408.2910|152.0427 839312.7422|65.0396 407227.1973	1.54713e+06
5.43_335.0778m/z	3,3',4',5,7-Pentahydroxyflavanone	C15H12O7	5.42793	335.078	335.077	54.7	neg	M-H+CH3OH	3.53546	471	CXQWRCVTCMQVQX-UHFFFAOYSA-N		1.5	Phenylpropanoids and polyketides	Flavonoids	Flavans	179.0349 593832.8438|135.0451 554651.8145|161.0244 542831.2070|335.0669 279985.1875|93.0345 215293.5625	65089.8
7.21_285.0757m/z	7-O-Methylbaicalein	C16H12O5	7.20607	285.076	285.076	59.7	pos	M+H	-0.0490232	471719	ZTHLHHDJRXJGRX-UHFFFAOYSA-N	COC1=C(C(=C2C(=C1)OC(=CC2=O)C3=CC=CC=C3)O)O	3	Phenylpropanoids and polyketides	Flavonoids	O-methylated flavonoids	147.0441 30197880.7500|121.0650 13183858.5000|270.0525 6374808.7500|284.1280 5958348.0000|285.0745 5461015.3750	79531.7
8.46_331.1905m/z	meso-dihydroguaiaretic acid	C20H26O4	8.45683	331.19	331.19	75	pos	M+H	0.265254	476856	ADFOLUXMYYCTRR-OKILXGFUSA-N	CC(CC1=CC(=C(C=C1)O)OC)C(C)CC2=CC(=C(C=C2)O)OC	5	Lignans, neolignans and related compounds	Dibenzylbutane lignans		331.0809 8913223.8828|315.0498 3455884.3125|316.0556 1209242.3516|270.0521 1193845.8203|287.0544 576125.7422	688598
12.77_343.0832m/z	(+)-Usniacin	C18H16O7	12.7662	343.083	343.082	95.7	neg	M-H	2.45797	478125	WEYVVCKOOFYHRW-SFHVURJKSA-N	CC1=C(C(=C2C(=C1O)C3(C(=CC(=C(C3=O)C(=O)C)O)O2)C)C(=O)C)O	2.1	Benzenoids	Benzene and substituted derivatives	Acetophenones	343.0827 1001168.2969|328.0592 612181.2383|83.0139 475814.3540|259.0612 320047.6226|231.0660 315085.5254	388710
7.39_275.0913m/z	Phloretin	C15H14O5	7.38955	275.091	275.092	93.63	pos	[M+H]+	-2.57334	4788	VGEREEWJJVICBM-UHFFFAOYSA-N	C1=CC(=CC=C1CCC(=O)C2=C(C=C(C=C2O)O)O)O	2.6	Phenylpropanoids and polyketides	Linear 1,3-diarylpropanoids	Chalcones and dihydrochalcones	151.0385 16055485.9375|275.0918 4995496.0000|123.0443 993050.1250|131.0492 622321.8203|188.1069 428076.5000	693015
9.58_341.1385m/z	8-Prenylnaringenin	C20H20O5	9.58093	341.138	341.138	97.07	pos	[M+H]+	0.481332	480764	LPEPZZAVFJPLNZ-SFHVURJKSA-N	CC(=CCC1=C2C(=C(C=C1O)O)C(=O)CC(O2)C3=CC=C(C=C3)O)C	4.3	Phenylpropanoids and polyketides	Flavonoids	Flavans	237.1279 634422.3906|209.1321 262668.9414|194.1091 152997.5273|179.0847 133305.5625|167.0850 91896.1055	71014.9
8.58_399.1457m/z	Dehydroglyasperin C	C21H22O5	8.58037	399.146	399.145	68.9	neg	M+HCOO	2.26347	480775	UACNRZUVCUEUPY-UHFFFAOYSA-N	CC(=CCC1=C(C2=C(C=C1O)OCC(=C2)C3=C(C=C(C=C3)O)O)OC)C	4.3	Phenylpropanoids and polyketides	Isoflavonoids	O-methylated isoflavonoids	355.1548 1014409.1250|108.0214 921341.5547|96.9599 595140.1563|283.0606 529110.2383|399.1474 505936.1406	2.31156e+06
7.12_287.0550m/z	Pimpinellin	C13H10O5	7.12337	287.055	287.053	40.3	pos	M+H2O+Na	7.72415	4825	BQPRWZCEKZLBHL-UHFFFAOYSA-N	COC1=C(C2=C(C=CO2)C3=C1C=CC(=O)O3)OC	2.3	Phenylpropanoids and polyketides	Coumarins and derivatives	Furanocoumarins	287.0541 3333848.5000|123.0078 279915.1997|119.0492 188582.6660|125.0601 186652.4404|269.1379 175996.2031	131197
4.92_351.0724m/z	Amaronol B	C16H14O8	4.91843	351.072	351.072	36.3	neg	M-H+H2O	2.60251	485522	YCDTYNVODFTPCZ-UHFFFAOYSA-N	COC1=C(C=C(C=C1O)CC2(C(=O)C3=C(C=C(C=C3O2)O)O)O)O	1.8	Phenylpropanoids and polyketides	Aurone flavonoids	Auronols	133.0295 912348.7578|191.0564 632320.7070|173.0455 411606.5586|215.0562 409893.9414|93.0346 377848.3311	1.06689e+06
11.35_485.3278m/z	Melliferone	C30H44O4	11.3534	485.328	485.327	90	neg	M-H+H2O	2.45171	489940	BHVMSBIGWPPGBF-LHAYROSJSA-N	CC1(CCC23CCC4(C5(CCC6C(C(=O)CCC6(C5C=CC4(C2C1)OC3=O)C)(C)C)C)C)C	6.8	Lipids and lipid-like molecules	Prenol lipids	Triterpenoids	485.3277 1067114.3438|455.3138 114449.5200|467.3178 98816.6302|71.0503 17601.8883|423.3253 16976.0866	1.67059e+06
5.70_136.0524n	Primidone	C12H14N2O2	5.70178	219.113	219.113	58.14	pos	[M+H]+	-0.548979	4909	DQMZLTXERSFNPB-UHFFFAOYSA-N	CCC1(C(=O)NCNC1=O)C2=CC=CC=C2	0.9	Organoheterocyclic compounds	Diazines	Pyrimidines and pyrimidine derivatives	131.0491 314566038.0000|202.1227 122322410.0000|103.0546 53232146.0000|72.0814 38513506.5000|89.1078 5056552.5000	350428
3.21_211.0613m/z	Propyl gallate	C10H12O5	3.21318	211.061	211.061	56.16	neg	[M-H]-	1.25144	4947	ZTHYODDOHIVTJV-UHFFFAOYSA-N	CCCOC(=O)C1=CC(=C(C(=C1)O)O)O	1.8	Benzenoids	Benzene and substituted derivatives	Benzoic acids and derivatives	94.0298 668288.1768|123.0452 654686.5068|149.0609 544574.8950|134.0374 397398.6943|124.0400 313414.9985	363332
7.01_372.1443m/z	Protopine	C20H19NO5	7.01103	372.144	372.145	39.1	pos	M+H2O+H	-1.09642	4970	GPTFURBXHJWNHR-UHFFFAOYSA-N	CN1CCC2=CC3=C(C=C2C(=O)CC4=C(C1)C5=C(C=C4)OCO5)OCO3	2.8	Alkaloids and derivatives	Protopine alkaloids		189.0548 1830204.9688|137.0598 1459744.0000|217.0495 711255.2344|121.0650 681165.5801|163.0755 634516.3125	258735
0.94_146.0924m/z	4-guanidinobutanoic acid	C5H11N3O2	0.942783	146.092	146.093	84.2	pos	[M+H]+	-3.61087	500	TUHVEAJXIMEOSA-UHFFFAOYSA-N	C(CC(=O)O)CN=C(N)N	-1.5	Organic acids and derivatives	Carboxylic acids and derivatives	Amino acids, peptides, and analogues	87.0445 51995755.9297|146.0924 48725682.1250|86.0606 36404802.7813|60.0563 10298753.4941|104.0710 10080072.1016	1.04283e+07
10.17_419.1338m/z	Liquiritin	C21H22O9	10.1694	419.134	419.134	96.1	pos	[M+H]+	0.283547	503737	DEMKZLAVQYISIA-ZRWXNEIDSA-N	C1C(OC2=C(C1=O)C=CC(=C2)O)C3=CC=C(C=C3)OC4C(C(C(C(O4)CO)O)O)O	0.4	Phenylpropanoids and polyketides	Flavonoids	Flavonoid glycosides	419.1344 3867860.5625|389.0866 2665243.4688|361.0916 789472.3438|328.0573 617181.2734|346.0684 425526.8203	667858
7.84_341.1383m/z	Flavanone base + 3O, 1Prenyl	C20H20O5	7.8417	341.138	341.138	93.87	pos	[M+H]+	-0.161686	509245	LPEPZZAVFJPLNZ-UHFFFAOYSA-N	CC(=CCC1=C2C(=C(C=C1O)O)C(=O)CC(O2)C3=CC=C(C=C3)O)C	4.3	Phenylpropanoids and polyketides	Flavonoids	Flavans	137.0598 1611748.9063|271.0964 846624.3906|291.1023 836767.0000|323.1267 755911.9922|187.0756 668658.3906	826304
6.97_403.1406m/z	Fibraurin	C20H20O7	6.96815	403.141	403.139	76.5	neg	M-H+CH3OH	3.55892	50990766	XUFRUKAPNGPYSR-OHLXRHPZSA-N	CC12CC=C3C(=O)OC(CC3(C1C4C5C(C2(C(=O)O4)O)O5)C)C6=COC=C6	1.4				403.1367 611512.3047|61.9883 225055.8281|343.1204 190321.8555|166.0269 167312.7813|373.1296 155503.7344	132813
7.13_375.1451m/z	13-Deoxy-Isogibberellic acid	C19H22O5	7.13065	375.145	375.145	64.1	neg	M+HCOO	0.548534	51136328	NIYWWSSZSAHRIW-TXVGEWSDSA-N	CC12C3C(C45CC(CCC4C3=CC(C1O)OC2=O)C(=C)C5)C(=O)O	1.1	Lipids and lipid-like molecules	Prenol lipids	Terpene lactones	135.0451 2699301.7656|149.0245 1405954.4141|357.1351 360256.0625|165.1287 260991.9883|179.0349 225188.5176	131646
5.06_537.1818m/z	Phenethyl sophoroside	C20H30O11	5.06368	537.182	537.183	65.7	neg	M+HCOOH+HCOO	-1.50471	51136362	BSSIFJHEGYUPRJ-HNCKFYPBSA-N	C1=CC=C(C=C1)CCOC2C(C(C(C(O2)CO)O)O)OC3C(C(C(C(O3)CO)O)O)O	-1.7	Organic oxygen compounds	Organooxygen compounds	Carbohydrates and carbohydrate conjugates	59.0138 957598.1875|71.0139 626663.9355|89.0246 432120.1875|293.0876 350606.4180|125.0243 338302.2363	382810
10.68_307.1916m/z	3-Methoxy-5-pentyl-2-prenylphenol	C17H26O2	10.6755	307.192	307.191	43.2	neg	M+HCOO	0.523009	51136386	FCNLMUQPSJEBQE-UHFFFAOYSA-N	CCCCCC1=CC(=C(C(=C1)OC)CC=C(C)C)O	5.9	Benzenoids	Phenols	Methoxyphenols	307.1926 2044851.9313|289.1839 383000.5299|223.1330 268839.7335|137.0970 266528.0344|237.1129 216035.5039	2.80317e+06
4.63_491.1413m/z	6-O-Vanilloylsucrose	C20H28O14	4.62785	491.141	491.141	67.5	neg	M-H	1.27321	51136426	CFTZBGSPPBNRNF-GXFVINSESA-N	COC1=C(C=CC(=C1)C(=O)OCC2C(C(C(C(O2)OC3(C(C(C(O3)CO)O)O)CO)O)O)O)O	-2.4	Phenylpropanoids and polyketides	Tannins	Hydrolyzable tannins	341.1091 791745.7832|59.0138 549507.1797|71.0138 297931.0000|149.0242 275433.8066|89.0245 249960.5469	302406
6.10_465.1032m/z	Isoquercitrin	C21H20O12	6.09745	465.103	465.103	98.5	pos	M+H	1.00682	51402807	OVSQVDMCBVZWGM-LVWULRLVSA-N	C1=CC(=C(C=C1C2=C(C(=O)C3=C(C=C(C=C3O2)O)O)OC4C(C(C(C(O4)CO)O)O)O)O)O	0.4	Phenylpropanoids and polyketides	Flavonoids	Flavonoid glycosides	303.0493 32554896.5000|61.0291 1944187.0000|85.0289 1798252.1250|153.0182 1763811.5000|229.0503 1414274.9609	5.85798e+06
5.26_136.0405m/z	Salicylamide	C7H7NO2	5.26452	136.04	136.039	75.55	neg	[M-H]-	6.69332	5147	SKZKKFZAGNVIMN-UHFFFAOYSA-N	C1=CC=C(C(=C1)C(=O)N)O	1.3	Benzenoids	Phenols	1-hydroxy-4-unsubstituted benzenoids	136.0163 2527880.7500|136.0405 2149963.5000|93.0343 2091187.6250|108.0214 973425.9375|135.0455 771128.0625	52862.5
5.74_319.0461m/z	Flavanone base + 6O	C15H12O8	5.7384	319.046	319.045	62.18	neg	[M-H]-	3.53281	5153580	KJXSIXMJHKAJOD-UHFFFAOYSA-N	C1=C(C=C(C(=C1O)O)O)C2C(C(=O)C3=C(C=C(C=C3O2)O)O)O	1.1	Phenylpropanoids and polyketides	Flavonoids	Flavans	231.0667 907794.4766|187.0401 367158.4063|203.0710 198190.2480|159.0456 143439.9580|188.0465 135192.5156	72359.6
8.11_423.1092m/z	Gardoside methyl ester	C17H24O10	8.11323	423.109	423.106	72.4	neg	M+Cl	7.38051	51692952	AFFNBNJOIDYUQN-QUQWIGIVSA-N	COC(=O)C1=COC(C2C1CC(C2=C)O)OC3C(C(C(C(O3)CO)O)O)O	-2.1	Organic oxygen compounds	Organooxygen compounds	Carbohydrates and carbohydrate conjugates	423.1057 1332993.7031|407.0779 159179.3438|391.0820 146434.9688|61.9884 142257.5469|393.0610 140571.2627	174884
8.03_201.1134m/z	Decanedioic acid	C10H18O4	8.02592	201.113	201.112	57.09	neg	[M-H]-	4.03376	5192	CXMXRPHRNRROMY-UHFFFAOYSA-N	C(CCCCC(=O)O)CCCC(=O)O	2.1	Lipids and lipid-like molecules	Fatty Acyls	Fatty acids and conjugates	201.1137 546332.2500|157.1234 303873.9531|139.1128 224166.3262|127.1126 119388.6914|59.0138 58734.4688	565651
4.76_647.1878m/z	Cornuside	C24H30O14	4.76052	647.188	647.182	72.9	neg	M+CH3COOH+HCOO	9.10651	5196231	SMTKSCGLXONVGL-UHFFFAOYSA-N	COC(=O)C1=COC(C(C1CCOC(=O)C2=CC(=C(C(=C2)O)O)O)C=C)OC3C(C(C(C(O3)CO)O)O)O	-0.2	Lipids and lipid-like molecules	Prenol lipids	Terpene glycosides	135.0450 1818913.5234|179.0349 1478610.2188|647.1870 452518.2813|473.1309 435862.2852|191.0564 340203.8027	360261
1.98_147.0691n	Cinnamamide	C9H9NO	1.98198	164.072	164.071	67.3	neg	M-H+H2O, M+CH3COO	4.46336	5273472	APEJMQOBVMLION-VOTSOKGWSA-N	C1=CC=C(C=C1)C=CC(=O)N	1.4	Phenylpropanoids and polyketides	Cinnamic acids and derivatives	Cinnamic acid amides	147.0453 55230948.6758|164.0703 37075066.4609|103.0552 19276632.5791|72.0090 15182992.5234|91.0550 2048057.1523	2.61834e+07
5.28_369.0834m/z	fraxin	C16H18O10	5.27833	369.083	369.083	74.2	neg	M-H	1.96565	5273568	CRSFLLTWRCYNNX-QBNNUVSCSA-N	COC1=C(C(=C2C(=C1)C=CC(=O)O2)OC3C(C(C(C(O3)CO)O)O)O)O	-0.6	Phenylpropanoids and polyketides	Coumarins and derivatives	Coumarin glycosides	207.0295 1924342.4141|192.0061 1493842.3750|369.0889 1099785.2500|190.9984 688123.0000|85.0294 431083.6563	438292
5.78_209.0446m/z	Fraxetin	C10H8O5	5.77878	209.044	209.044	80.19	pos	[M+H]+	0.713463	5273569	HAVWRBANWNTOJX-UHFFFAOYSA-N	COC1=C(C(=C2C(=C1)C=CC(=O)O2)O)O	1.2	Phenylpropanoids and polyketides	Coumarins and derivatives	Hydroxycoumarins	209.0443 3198931.7969|194.0209 557901.6719|149.0231 539242.0625|149.0596 535721.1250|121.0654 493986.6875	140007
10.20_343.0829m/z	Eupatilin	C18H16O7	10.1954	343.083	343.082	90.6	neg	M-H	1.77877	5273755	DRRWBCNQOKKKOL-UHFFFAOYSA-N	COC1=C(C=C(C=C1)C2=CC(=O)C3=C(O2)C=C(C(=C3O)OC)O)OC	2.9	Phenylpropanoids and polyketides	Flavonoids	O-methylated flavonoids	313.0351 2714294.1563|328.0588 1897272.5703|343.0826 1584934.5234|187.0986 527589.3496|242.0215 508174.9980	3.42709e+06
7.36_373.1875m/z	Lotusine	C19H24NO3+	7.35627	373.187	373.19	52.6	neg	M+CH3COO	-6.1686	5274587	ZKTMLINFIQCERN-QGZVFWFLSA-O	C[N+]1(CCC2=CC(=C(C=C2C1CC3=CC=C(C=C3)O)OC)O)C	3.1	Organoheterocyclic compounds	Isoquinolines and derivatives	Benzylisoquinolines	59.0138 827878.6895|135.0451 605963.3711|373.1925 509861.9063|71.0138 487976.2290|329.1364 473731.1211	519253
7.72_341.1975m/z	6-Gingerdiol	C17H28O4	7.72188	341.197	341.197	45.8	neg	M+HCOO	1.7529	5275727	QYXKQNMJTHPKBP-UHFFFAOYSA-N	CCCCCC(CC(CCC1=CC(=C(C=C1)O)OC)O)O	3	Benzenoids	Phenols	Methoxyphenols	341.1922 623243.3281|341.0970 282977.0273|341.2044 279853.1543|281.1755 259078.9412|279.1974 184173.9233	1.46777e+06
5.76_303.0500m/z	Quercetin	C15H10O7	5.75505	303.05	303.05	93.89	pos	[M+H]+	-1.7275	5280343	REFJWTPEDVJJIY-UHFFFAOYSA-N	C1=CC(=C(C=C1C2=C(C(=O)C3=C(C=C(C=C3O2)O)O)O)O)O	1.5	Phenylpropanoids and polyketides	Flavonoids	Flavones	131.0490 27598952.2695|188.1068 19141002.0000|287.1753 5700465.5000|103.0545 3275808.7500|303.0468 3109531.2500	90195.1
8.10_351.2183m/z	PGE2	C20H32O5	8.09678	351.218	351.216	79.07	neg	[M-H]-	3.70965	5280360	XEYBRNLFEZDVAW-ARSRFYASSA-N	CCCCCC(C=CC1C(CC(=O)C1CC=CCCCC(=O)O)O)O	2.8	Lipids and lipid-like molecules	Fatty Acyls	Eicosanoids	351.2179 7875774.1250|85.0659 1463150.9238|207.1390 901613.6250|351.0678 892671.0000|202.9987 431550.4922	657125
6.15_221.0445m/z	Bergaptol	C11H6O4	6.15138	221.045	221.045	72	pos	M+H2O+H	-2.38069	5280371	GIJHDGJRTUSBJR-UHFFFAOYSA-N	C1=CC(=O)OC2=CC3=C(C=CO3)C(=C21)O	2	Phenylpropanoids and polyketides	Coumarins and derivatives	Furanocoumarins	131.0491 11021647.3750|159.0440 10342225.0625|147.0440 9074632.0000|103.0545 7257192.3438|175.0391 5806974.4688	1.24087e+06
5.97_313.0718m/z	Formononetin	C16H12O4	5.97148	313.072	313.072	68.9	neg	M+HCOO	0.180081	5280378	HKQYGTCOTHHOMP-UHFFFAOYSA-N	COC1=CC=C(C=C1)C2=COC3=C(C2=O)C=CC(=C3)O	2.8	Phenylpropanoids and polyketides	Isoflavonoids	O-methylated isoflavonoids	313.0691 1652211.0000|269.0874 940668.7500|254.0583 740891.6406|109.0280 499825.3691|127.0513 436666.5000	724550
8.11_369.0628m/z	Sterigmatocystine	C18H12O6	8.11323	369.063	369.061	61.7	neg	M+HCOO	3.65234	5280389	UTSVPXMQSFGQTM-DCXZOGHSSA-N	COC1=C2C(=C3C4C=COC4OC3=C1)OC5=CC=CC(=C5C2=O)O	3.4	Phenylpropanoids and polyketides	Sterigmatocystins		325.0721 763783.6094|309.0404 614583.5625|310.0464 341055.6914|74.0247 219962.6260|368.2511 166910.2813	172576
6.74_269.0450m/z	Apigenin	C15H10O5	6.74347	269.046	269.046	89.66	neg	[M-H]-	-1.9988	5280443	KZNIFHPLKGYRTM-UHFFFAOYSA-N	C1=CC(=CC=C1C2=CC(=O)C3=C(C=C(C=C3O2)O)O)O	1.7	Phenylpropanoids and polyketides	Flavonoids	Flavones	269.0439 26117258.5000|109.0294 1698298.4453|223.0400 1141852.2500|195.0449 1089221.3906|241.0502 1062641.0000	384233
7.53_287.0550m/z	Luteolin	C15H10O6	7.52963	287.055	287.055	81.2	pos	M+H	-0.0281432	5280445	IQPNAANSBPBGFQ-UHFFFAOYSA-N	C1=CC(=C(C=C1C2=CC(=O)C3=C(C=C(C=C3O2)O)O)O)O	1.4	Phenylpropanoids and polyketides	Flavonoids	Flavones	287.0544 30842883.0469|153.0181 2995997.6094|135.0441 981765.1875|161.0242 290338.4385|137.0228 288894.7305	2.7488e+06
0.76_132.0303m/z	Maleamic acid	C4H5NO3	0.7599	132.03	132.03	80.6	neg	M-H+H2O	5.29113	5280451	FSQQTNAZHBEJLS-UPHRSURJSA-N	C(=CC(=O)O)C(=O)N	-1	Lipids and lipid-like molecules	Fatty Acyls	Fatty acids and conjugates	115.0035 116829528.0000|71.0137 47294040.0000|88.0403 17118276.0000|72.9930 11809237.0000|89.0244 8008173.5000	1.05711e+06
8.92_257.0818m/z	Pinosylvin	C14H12O2	8.92305	257.082	257.082	71.5	neg	M+HCOO	-0.55313	5280457	YCVPRTHEGLPYPB-VOTSOKGWSA-N	C1=CC=C(C=C1)C=CC2=CC(=CC(=C2)O)O	3.5	Phenylpropanoids and polyketides	Stilbenes		257.0816 1281863.1406|213.0921 1027491.3047|59.0138 165070.2529|256.1634 126762.2266|256.2352 69383.5391	79748.4
5.12_193.0498m/z	Scopoletin	C10H8O4	5.1213	193.05	193.049	79.68	pos	[M+H]+	1.30653	5280460	RODXRVNMMDRFIK-UHFFFAOYSA-N	COC1=C(C=C2C(=C1)C=CC(=O)O2)O	1.5	Phenylpropanoids and polyketides	Coumarins and derivatives	Hydroxycoumarins	193.0503 6926160.5313|161.0598 6293582.0000|105.0702 4357589.8594|133.0648 4260693.4531|133.0293 2194445.1719	195799
6.88_255.1601m/z	Vomifoliol	C13H20O3	6.88045	255.16	255.16	53.1	neg	M-H+CH3OH	2.06076	5280462	KPQMCAKZRXOZLB-KOIHBYQTSA-N	CC1=CC(=O)CC(C1(C=CC(C)O)O)(C)C	0.5	Lipids and lipid-like molecules	Prenol lipids	Sesquiterpenoids	255.1599 1760445.2500|211.1342 399976.5938|59.0137 244365.4824|165.1282 117442.2920|237.1499 108620.3076	50043.9
5.15_149.0610m/z	p-Coumaryl alcohol	C9H10O2	5.1513	149.061	149.06	54.96	neg	[M-H]-	5.62729	5280535	PTNLHDGQWUGONS-OWOJBTEDSA-N	C1=CC(=CC=C1C=CCO)O	1.3	Phenylpropanoids and polyketides	Cinnamyl alcohols		149.0607 2675201.0938|149.0244 346179.1445|134.0372 187286.9844|147.0085 177607.0156|121.0300 122751.0752	73001.2
5.58_179.0704m/z	Coniferaldehyde	C10H10O3	5.57722	179.07	179.07	93.19	pos	[M+H]+	0.591398	5280536	DKZBBWMURDFHNE-NSCUHMNNSA-N	COC1=C(C=CC(=C1)C=CC=O)O	1.5	Benzenoids	Phenols	Methoxyphenols	105.0338 1384695.1484|179.0702 545848.8750|179.0336 527099.3750|131.0493 490322.5000|137.0596 465783.5898	153638
7.15_314.1386m/z	Feruloyl tyramine	C18H19NO4	7.15028	314.139	314.139	97.07	pos	[M+H]+	-0.351224	5280537	NPNNKDMSXVRADT-WEVVVXLNSA-N	COC1=C(C=CC(=C1)C=CC(=O)NCCC2=CC=C(C=C2)O)O	2.1	Benzenoids	Phenols	Methoxyphenols	177.0544 1552755.4844|121.0649 809933.3242|145.0284 758147.3438|314.1410 521054.9375|117.0336 238940.9238	72509.1
5.58_177.0547m/z	7-Hydroxy-4-methylcoumarin	C10H8O3	5.57722	177.055	177.055	92.66	pos	[M+H]+	0.38865	5280567	HSHNITRMYYLLCV-UHFFFAOYSA-N	CC1=CC(=O)OC2=C1C=CC(=C2)O	1.9	Phenylpropanoids and polyketides	Coumarins and derivatives	Hydroxycoumarins	145.0284 7455067.3750|117.0337 4651275.8906|177.0545 3155744.9375|131.0492 2456916.7500|89.0390 2034985.0566	483411
4.68_223.0249m/z	7,8-Dihydroxycoumarin	C9H6O4	4.68053	223.025	223.025	52.4	neg	M+HCOO	0.643658	5280569	ATEFPOUAMCWAQS-UHFFFAOYSA-N	C1=CC(=C(C2=C1C=CC(=O)O2)O)O	1.2	Phenylpropanoids and polyketides	Coumarins and derivatives	Hydroxycoumarins	136.0166 5005936.7500|151.0401 2301940.3906|179.0352 1593341.2344|135.0451 1282876.1250|59.0138 806053.1484	539647
5.16_387.1305m/z	Rosin	C15H20O6	5.1641	387.131	387.129	48.9	neg	M+HCOOH+HCOO	2.88878	5280656	KHPCPRHQVVSZAH-GUNCLKARSA-N	C1=CC=C(C=C1)C=CCOC2C(C(C(C(O2)CO)O)O)O	-0.1	Lipids and lipid-like molecules	Fatty Acyls	Fatty acyl glycosides	387.1354 968702.6250|93.0346 900976.8789|59.0139 675016.6875|71.0139 462668.9375|161.0462 327746.8125	267487
9.68_221.1185m/z	Dehydrovomifoliol	C13H18O3	9.67818	221.118	221.118	49	neg	M-H	0.745731	5280662	JJRYPZMXNLLZFH-AATRIKPKSA-N	CC1=CC(=O)CC(C1(C=CC(=O)C)O)(C)C	0.5				59.0138 1533429.2090|177.1259 1252058.4688|175.1128 276182.9063|177.0900 246306.2236|161.0455 218174.5054	267640
9.36_353.2339m/z	Alprostadil	C20H34O5	9.36448	353.234	353.233	43.1	neg	M-H	1.45031	5280723	GMVPRGQOIOIIMI-DWKJAMRDSA-N	CCCCCC(C=CC1C(CC(=O)C1CCCCCCC(=O)O)O)O	3.2	Lipids and lipid-like molecules	Fatty Acyls	Eicosanoids	191.0561 371850.7070|353.2360 319618.5313|267.1592 308277.4063|249.1491 200547.0898|310.2022 121654.7891	76454.4
1.46_371.0992m/z	Melilotoside	C15H18O8	1.45658	371.099	371.098	50.8	neg	M+HCOO	2.6613	5280759	GVRIYIMNJGULCZ-ZMKUSUEASA-N	C1=CC=C(C(=C1)C=CC(=O)O)OC2C(C(C(C(O2)CO)O)O)O	-0.4	Organic oxygen compounds	Organooxygen compounds	Carbohydrates and carbohydrate conjugates	191.0562 3265765.8672|371.0987 985923.5273|135.0452 952975.1563|173.0453 570954.1189|61.9883 344331.9375	3.07558e+06
5.90_609.1477m/z	Rutin	C27H30O16	5.90352	609.148	609.146	74.3	neg	M-H	2.58009	5280805	IKGXIBQEEMLURG-NVPNHPEKSA-N	CC1C(C(C(C(O1)OCC2C(C(C(C(O2)OC3=C(OC4=CC(=CC(=C4C3=O)O)O)C5=CC(=C(C=C5)O)O)O)O)O)O)O)O	-1.3	Phenylpropanoids and polyketides	Flavonoids	Flavonoid glycosides	300.0268 1014991.5625|271.0238 464112.7383|609.1436 212566.9063|255.0275 201329.1406|243.0318 73411.9453	1.62421e+06
8.26_285.0403m/z	Kaempferol	C15H10O6	8.25738	285.041	285.041	81.86	neg	[M-H]-	-0.486247	5280863	IYRMWMYZSQPJKC-UHFFFAOYSA-N	C1=CC(=CC=C1C2=C(C(=O)C3=C(C=C(C=C3O2)O)O)O)O	1.9	Phenylpropanoids and polyketides	Flavonoids	Flavones	285.0393 4117887.7188|61.9883 357307.0938|241.0498 212421.4824|133.0296 174537.0020|59.0138 165119.4434	412303
6.16_354.1911m/z	Senecionine	C18H25NO5	6.16328	354.191	354.192	74.9	pos	M+H2O+H	-1.72564	5280906	HKODIGSRFALUTA-JTLQZVBZSA-N	CC=C1CC(C(C(=O)OCC2=CCN3C2C(CC3)OC1=O)(C)O)C	1.1	Phenylpropanoids and polyketides	Macrolides and analogues		354.1977 990261.3125|120.0809 536629.8750|147.0438 474746.6211|308.1860 359038.3633|131.0493 347794.3711	200572
13.49_277.2173m/z	alpha-linolenic acid	C18H30O2	13.4908	277.217	277.217	88.63	neg	[M-H]-	0.0417303	5280934	DTOSIQBPPRVQHS-PDBXOOCHSA-N	CCC=CCC=CCC=CCCCCCCCC(=O)O	5.9	Lipids and lipid-like molecules	Fatty Acyls	Lineolic acids and derivatives	277.2170 997174.1393|134.8947 14617.8464|59.0134 11591.1675|241.7937 10789.3849|61.9877 10202.2021	1.09633e+06
8.14_273.0757m/z	Naringenin chalcone	C15H12O5	8.13962	273.076	273.076	90.4	pos	M+H	-0.289469	5280960	YQHMWTPYORBCMF-ZZXKWVIFSA-N	C1=CC(=CC=C1C=CC(=O)C2=C(C=C(C=C2O)O)O)O	2.8	Phenylpropanoids and polyketides	Linear 1,3-diarylpropanoids	Chalcones and dihydrochalcones	153.0181 34932553.6289|273.0754 33514126.8516|147.0439 15035271.2969|119.0493 4601470.6953|91.0547 1349930.6294	6.25921e+06
15.03_284.2948m/z	stearic acid	C18H36O2	15.0338	284.295	284.295	47.3	pos	M+NH4-H2O	-1.76628	5281	QIQXTHQIDYTFRH-UHFFFAOYSA-N	CCCCCCCCCCCCCCCCCC(=O)O	7.4	Lipids and lipid-like molecules	Fatty Acyls	Fatty acids and conjugates	284.2961 299957.6875|88.0760 46841.3281|57.0706 41492.3125|60.0815 28321.1152|102.0913 27730.9512	29574.2
12.35_338.1751m/z	Olopatadine	C21H23NO3	12.3491	338.175	338.175	92.71	pos	[M+H]+	-0.0216318	5281071	JBIMVDZLSHOPLA-LSCVHKIXSA-N	CN(C)CCC=C1C2=CC=CC=C2COC3=C1C=C(C=C3)CC(=O)O	1.5	Organoheterocyclic compounds	Benzoxepines	Dibenzoxepines	338.1340 563000.8125|293.1130 554764.7979|337.1262 452640.9375|322.1029 282699.7500|321.0947 191338.5156	113516
11.69_296.2352n	Laetisaric acid	C18H32O3	11.694	295.228	295.228	38.7	neg	M-H, M+Cl	0.103648	5281117	UKRXAPMQXXXXTD-QMEIEYGNSA-N	CCCCCC=CCC=CC(CCCCCCC(=O)O)O	5.1	Lipids and lipid-like molecules	Fatty Acyls	Lineolic acids and derivatives	331.1917 3162996.6563|298.1573 928730.9219|270.1625 150091.7031|313.1800 113637.4844|285.1866 98109.0391	1.25246e+07
1.10_274.0928m/z	Sarmentosin	C11H17NO7	1.09995	274.093	274.093	52.8	neg	M-H	-1.51269	5281123	FWAYDNJCBHNWQD-JBWLPIRVSA-N	C(C=C(CO)C#N)OC1C(C(C(C(O1)CO)O)O)O	-3.1	Lipids and lipid-like molecules	Fatty Acyls	Fatty acyl glycosides	128.0351 14089338.5625|200.0564 3762328.9219|274.0953 1699130.0000|194.0461 1021217.9375|170.0460 897327.0156	619061
6.95_145.0871m/z	cis-3-Hexen-1-ol	C6H12O	6.9461	145.087	145.087	47	neg	M+HCOO	0.749083	5281167	UFLHIIWVXFIJGU-ARJAWSKDSA-N	CCC=CCCO	1.3	Lipids and lipid-like molecules	Fatty Acyls	Fatty alcohols	99.0815 35086928.7500|145.0869 25944537.3750|144.0459 2315554.7500|99.1028 851250.5625|127.0736 743615.8125	2.23733e+06
7.83_343.1540m/z	Isobavachalcone	C20H20O4	7.82672	343.154	343.155	36.3	pos	M+H2O+H	-1.6564	5281255	DUWPGRAKHMEPCM-IZZDOVSWSA-N	CC(=CCC1=C(C=CC(=C1O)C(=O)C=CC2=CC=C(C=C2)O)O)C	5.1	Phenylpropanoids and polyketides	Linear 1,3-diarylpropanoids	Chalcones and dihydrochalcones	147.0440 6418198.2188|137.0597 2589563.5938|131.0491 2491425.7656|163.0753 1781883.6953|119.0492 1243725.8047	913504
6.77_177.0196m/z	5,7-Dihydroxychromone	C9H6O4	6.7674	177.02	177.019	51.7	neg	M-H	1.26858	5281343	NYCXYKOXLNBYID-UHFFFAOYSA-N	C1=COC2=CC(=CC(=C2C1=O)O)O	1.4	Organoheterocyclic compounds	Benzopyrans	1-benzopyrans	177.0199 4790726.5443|59.0138 913191.5856|133.0295 841603.2500|135.0447 667620.9155|71.0137 502875.0885	433728
7.34_445.1146m/z	4''-methyloxy-Genistin	C22H22O10	7.34488	445.115	445.114	86.6	neg	M-H	1.28137	5281377	ZCOLJUOHXJRHDI-CMWLGVBASA-N	C1=CC(=CC=C1C2=COC3=CC(=CC(=C3C2=O)O)O[C@H]4[C@@H]([C@H]([C@@H]([C@H](O4)CO)O)O)O)O	0.9				298.0481 1833548.4375|269.0450 1416892.1719|445.1092 1399746.4063|341.0670 1270371.9375|371.0780 536353.2969	298239
9.85_351.0515m/z	Daphnoretin (Thymelol)	C19H12O7	9.84887	351.051	351.051	78.2	neg	M-H	1.31716	5281406	JRHMMVBOTXEHGJ-UHFFFAOYSA-N	COC1=C(C=C2C(=C1)C=C(C(=O)O2)OC3=CC4=C(C=C3)C=CC(=O)O4)O	3.3	Phenylpropanoids and polyketides	Coumarins and derivatives	Hydroxycoumarins	351.0507 8082355.9063|336.0270 8064998.0313|308.0320 4637973.3672|279.0291 1265216.2324|202.9981 985389.6797	2.77329e+06
3.13_177.0195m/z	Aesculetin	C9H6O4	3.1336	177.019	177.019	61.25	neg	[M-H]-	0.976879	5281416	ILEDWLMCKZNDJK-UHFFFAOYSA-N	C1=CC(=O)OC2=CC(=C(C=C21)O)O	1.2	Phenylpropanoids and polyketides	Coumarins and derivatives	Hydroxycoumarins	133.0294 893633.3750|134.0606 791631.3750|177.0201 433127.9219|59.0137 413903.5811|105.0343 311712.4980	83741.6
4.80_341.0869m/z	Esculin	C15H16O9	4.80008	341.087	341.087	83.2	pos	M+H	0.502925	5281417	XHCADAYNFIFUHF-TVKJYDDYSA-N	C1=CC(=O)OC2=CC(=C(C=C21)OC3C(C(C(C(O3)CO)O)O)O)O	-0.6	Phenylpropanoids and polyketides	Coumarins and derivatives	Coumarin glycosides	179.0339 6244379.0313|70.0658 595831.5449|86.0969 359049.8438|123.0443 344476.3145|135.0441 319191.3828	254707
5.06_207.0300m/z	7-Hydroxycoumarin	C9H6O3	5.06368	207.03	207.03	80.2	neg	M+HCOO	0.648678	5281426	ORHBXUUXSCNDEV-UHFFFAOYSA-N	C1=CC(=CC2=C1C=CC(=O)O2)O	1.6	Phenylpropanoids and polyketides	Coumarins and derivatives	Hydroxycoumarins	163.0401 6065699.0625|207.0298 5654869.0000|135.0451 2197273.6719|107.0503 726802.7793|109.0295 601223.0918	574702
9.49_247.1338m/z	Artemorin	C15H20O3	9.48965	247.134	247.134	79.4	neg	M-H	-0.490038	5281428	JNHKVMWTQCZYHK-CVZWCJCVSA-N	CC1=CC2C(CCC(=C)C(CC1)O)C(=C)C(=O)O2	1	Lipids and lipid-like molecules	Prenol lipids	Terpene lactones	247.1335 2141013.9453|203.1445 695029.0260|69.0347 160200.8359|229.1217 90136.8203|184.0014 71115.9622	1.50974e+06
7.32_261.1130m/z	L-KAWAIN	C14H14O3	7.31905	261.113	261.113	51.5	neg	M-H+CH3OH	1.54331	5281565	XEAQIWGXBXCYFX-GUOLPTJISA-N	COC1=CC(=O)OC(C1)C=CC2=CC=CC=C2	2.5	Phenylpropanoids and polyketides	Kavalactones		261.1137 2030067.2813|217.1239 1864108.3281|137.0972 373115.5566|173.0972 155182.9648|158.0375 153306.0469	271965
15.16_305.0231m/z	Baicalein (Noroxylin)	C15H10O5	15.1574	305.023	305.022	48.8	neg	M+Cl	3.15463	5281605	FXNFHKRTJBSTCS-UHFFFAOYSA-N	C1=CC=C(C=C1)C2=CC(=O)C3=C(O2)C=C(C(=C3O)O)O	1.7	Phenylpropanoids and polyketides	Flavonoids	Flavones	59.0137 2020479.3086|141.0168 1975082.0664|223.0222 40022.6016|61.9885 36314.2227|209.9096 26027.5566	135753
9.53_255.0652m/z	Chrysin	C15H10O4	9.52697	255.065	255.065	97.38	pos	[M+H]+	0.0264195	5281607	RTIXKCRFFJGDFG-UHFFFAOYSA-N	C1=CC=C(C=C1)C2=CC(=O)C3=C(C=C(C=C3O2)O)O	2.1	Phenylpropanoids and polyketides	Flavonoids	Flavones	255.0649 5460401.6250|153.0180 384209.0273|240.1510 266335.6563|254.1618 197944.3594|225.1276 162722.6309	167488
9.61_373.0934m/z	Chrysosplenetin B	C19H18O8	9.61143	373.093	373.093	76.4	neg	M-H	1.4914	5281608	NBVTYGIYKCPHQN-UHFFFAOYSA-N	COC1=C(C=CC(=C1)C2=C(C(=O)C3=C(C(=C(C=C3O2)OC)OC)O)OC)O	3.1	Phenylpropanoids and polyketides	Flavonoids	O-methylated flavonoids	373.0937 2014270.1250|343.0461 1587614.9688|61.9883 1064251.0000|372.2189 939156.0000|328.0231 720272.7383	340514
8.27_301.0707m/z	Diosmetin	C16H12O6	8.26803	301.071	301.071	97.3	pos	M+H	0.0114606	5281612	MBNGWHIJMBWFHU-UHFFFAOYSA-N	COC1=C(C=C(C=C1)C2=CC(=O)C3=C(C=C(C=C3O2)O)O)O	1.7	Phenylpropanoids and polyketides	Flavonoids	O-methylated flavonoids	301.0707 16210485.1250|286.0471 8490773.0052|258.0523 5290560.2949|191.1068 358439.9160|223.0753 239184.5833	9.37299e+06
8.50_269.0452m/z	Galangin	C15H10O5	8.4982	269.045	269.046	59.2	neg	M-H	-1.12504	5281616	VCCRNZQBSJXYJD-UHFFFAOYSA-N	C1=CC=C(C=C1)C2=C(C(=O)C3=C(C=C(C=C3O2)O)O)O	2.3	Phenylpropanoids and polyketides	Flavonoids	Flavones	269.0403 4888304.9818|109.0294 375932.0578|223.0370 227107.4388|197.0611 207745.8346|169.0655 198015.3040	1.34108e+06
7.32_385.0934m/z	Jacareubin	C18H14O6	7.31905	385.093	385.093	50.5	neg	M+CH3COO	1.59389	5281644	UCLUVPCGXYTYEK-UHFFFAOYSA-N	CC1(C=CC2=C(O1)C=C3C(=C2O)C(=O)C4=C(O3)C(=C(C=C4)O)O)C	3.4	Organoheterocyclic compounds	Benzopyrans	1-benzopyrans	193.0505 1186405.8281|385.0892 832887.6797|134.0372 752437.7734|178.0271 409491.3711|297.0385 302243.3125	493662
7.54_329.0657m/z	Methylswertianin	C15H12O6	7.54115	329.066	329.063	40.2	pos	M+H2O+Na	6.82979	5281653	PUECEVJMPDNNHT-UHFFFAOYSA-N	COC1=C(C2=C(C=C1)OC3=CC(=CC(=C3C2=O)O)OC)O	2.7	Organoheterocyclic compounds	Benzopyrans	1-benzopyrans	283.0596 4795726.5625|165.0184 1121397.6172|311.0483 957605.9766|137.0435 603082.6699|329.0562 404736.1250	673666
7.58_303.0499m/z	Morin	C15H10O7	7.57563	303.05	303.05	84.9	pos	M+H	0.054824	5281670	YXOLAZRVSSWPPT-UHFFFAOYSA-N	C1=CC(=C(C=C1O)O)C2=C(C(=O)C3=C(C=C(C=C3O2)O)O)O	1.5	Phenylpropanoids and polyketides	Flavonoids	Flavones	303.0494 26933913.5000|153.0182 2640494.1875|229.0494 2154168.0469|137.0229 1481527.6797|165.0182 1108233.3750	1.71104e+06
5.34_361.0571m/z	Tamarixetin	C16H12O7	5.34082	361.057	361.056	69.9	neg	M+HCOO	1.96344	5281699	FPLMIPQZHHQWHN-UHFFFAOYSA-N	COC1=C(C=C(C=C1)C2=C(C(=O)C3=C(C=C(C=C3O2)O)O)O)O	1.9	Phenylpropanoids and polyketides	Flavonoids	Flavones	317.0662 1111529.3594|161.0240 344141.1094|149.0244 311831.4102|165.0193 307981.0625|109.0295 306625.7432	286182
9.52_283.0611m/z	Wogonin	C16H12O5	9.5184	283.061	283.061	91.6	neg	M-H	-0.236132	5281703	XLTFNNCXVBYBSX-UHFFFAOYSA-N	COC1=C(C=C(C2=C1OC(=CC2=O)C3=CC=CC=C3)O)O	3	Phenylpropanoids and polyketides	Flavonoids	O-methylated flavonoids	268.0372 2375534.4661|283.0602 1662180.6719|239.1439 237905.1380|163.0038 196370.1738|59.0138 183553.1432	2.19286e+06
7.76_313.0354m/z	Coumestrol	C15H8O5	7.76035	313.035	313.035	58.2	neg	M+HCOO	-0.000297219	5281707	ZZIALNLLNHEQPJ-UHFFFAOYSA-N	C1=CC2=C(C=C1O)OC3=C2C(=O)OC4=C3C=CC(=C4)O	2.8	Phenylpropanoids and polyketides	Isoflavonoids	Coumestans	298.0512 4006275.1250|161.0607 3051417.0469|119.0500 915334.7559|297.0396 519328.2188|312.1310 516643.2188	238360
6.87_271.0608m/z	Daidzein	C15H10O4	6.86788	271.061	271.061	56.1	neg	M-H+H2O	0.649358	5281708	ZQSIJRDFPHDXIC-UHFFFAOYSA-N	C1=CC(=CC=C1C2=COC3=C(C2=O)C=CC(=C3)O)O	2.5	Phenylpropanoids and polyketides	Isoflavonoids	Isoflav-2-enes	271.0607 4394464.2500|121.0295 1886310.5625|149.0244 1520645.6094|109.0294 1193560.4805|253.0508 960616.6250	333692
6.46_431.1340m/z	Polydatin	C20H22O8	6.4607	431.134	431.132	50.2	pos	M+H2O+Na	5.61346	5281718	HSTZMXCBWJGKHG-CUYWLFDKSA-N	C1=CC(=CC=C1C=CC2=CC(=CC(=C2)OC3C(C(C(C(O3)CO)O)O)O)O)O	1.7	Phenylpropanoids and polyketides	Stilbenes	Stilbene glycosides	313.0708 1761210.9219|413.1227 1324145.4844|395.1125 643309.3828|351.0862 620861.0234|327.0877 596442.9766	149569
1.14_202.1086m/z	Otonecine	C9H15NO3	1.13612	202.109	202.108	42.4	neg	M-H+H2O	4.03379	5281740	GRAGROPQORVALZ-VKWJFSHESA-N	CN1CCC(C(=O)C(=CC1)CO)O	-0.4	Organic nitrogen compounds	Organonitrogen compounds	Amines	130.0873 10599025.9167|202.0708 1102117.9688|157.0702 1085757.6667|128.0351 756372.6406|201.0600 683353.3750	1.81523e+06
5.43_473.0732m/z	Cichoric acid	C22H18O12	5.42793	473.073	473.073	86.7	neg	M-H	1.41034	5281764	YDDGKXBLOXEEMN-IABMMNSOSA-N	C1=CC(=C(C=C1C=CC(=O)OC(C(C(=O)O)OC(=O)C=CC2=CC(=C(C=C2)O)O)C(=O)O)O)O	2	Organic acids and derivatives	Carboxylic acids and derivatives	Tetracarboxylic acids and derivatives	149.0091 1387373.2344|179.0352 1161428.2891|135.0452 922281.6484|311.0410 319936.9746|87.0089 200398.1748	1.41663e+06
8.27_189.0910m/z	Ethyl 4-methoxycinnamate	C12H14O3	8.26803	189.091	189.091	37.3	pos	M+H-H2O	0.150902	5281783	DHNGCHLFKUPGPX-RMKNXTFCSA-N	CCOC(=O)C=CC1=CC=C(C=C1)OC	3	Phenylpropanoids and polyketides	Cinnamic acids and derivatives	Cinnamic acid esters	189.0919 10469489.3633|128.0622 4243712.9531|105.0703 3100900.6084|161.0966 3034295.7212|143.0853 2499701.1182	1.00921e+07
5.29_377.0885m/z	Rosmarinic acid	C18H16O8	5.2918	377.088	377.087	89.4	neg	M-H+H2O	3.42679	5281792	DOUMFZQKYFQNTF-WUTVXBCWSA-N	C1=CC(=C(C=C1CC(C(=O)O)OC(=O)C=CC2=CC(=C(C=C2)O)O)O)O	2.4	Phenylpropanoids and polyketides	Cinnamic acids and derivatives	Hydroxycinnamic acids and derivatives	161.0243 3198245.0293|135.0451 920295.7886|197.0454 763246.3086|133.0294 546076.7451|359.0760 529647.9756	2.45715e+06
6.42_493.1125m/z	Salvianolic acid A	C26H22O10	6.4242	493.112	493.114	96.5	neg	M-H	-3.16466	5281793	YMGFTDKNIWPMGF-UCPJVGPRSA-N	C1=CC(=C(C=C1CC(C(=O)O)OC(=O)C=CC2=C(C(=C(C=C2)O)O)C=CC3=CC(=C(C=C3)O)O)O)O	3.9	Phenylpropanoids and polyketides	Stilbenes		295.0612 30100781.5000|109.0295 20670107.1250|185.0246 19241451.0000|135.0452 5929975.2813|159.0450 5288510.9844	9.11454e+07
7.41_283.0610m/z	Prunetin	C16H12O5	7.41165	283.061	283.061	77.4	neg	M-H	-0.857797	5281804	KQMVAGISDHMXJJ-UHFFFAOYSA-N	COC1=CC(=C2C(=C1)OC=C(C2=O)C3=CC=C(C=C3)O)O	3	Phenylpropanoids and polyketides	Isoflavonoids	O-methylated isoflavonoids	268.0369 5177103.9375|283.0602 2560295.1250|163.0036 782304.7969|282.1364 673627.8125|166.1237 305870.8438	165048
6.09_300.9993m/z	Ellagic acid	C14H6O8	6.0853	300.999	300.999	59.4	neg	M-H	0.954161	5281855	AFSDNFLWKVMVRB-UHFFFAOYSA-N	C1=C2C3=C(C(=C1O)O)OC(=O)C4=CC(=C(C(=C43)OC2=O)O)O	1.1	Phenylpropanoids and polyketides	Tannins	Hydrolyzable tannins	300.9987 11598742.7500|300.1530 556765.6250|229.0136 551341.8867|283.9954 545867.2070|201.0196 452917.6328	352490
9.43_365.2688m/z	Ginkgolic Acid C15:1	C22H34O3	9.43297	365.269	365.269	54.1	pos	M+H2O+H	-1.21894	5281858	YXHVCZZLWZYHSA-FPLPWBNLSA-N	CCCCCCC=CCCCCCCCC1=C(C(=CC=C1)O)C(=O)O	8.5	Benzenoids	Benzene and substituted derivatives	Benzoic acids and derivatives	365.1801 294843.9609|329.2509 253664.1367|95.0860 134848.1973|81.0705 130102.4893|301.2563 126914.9980	119186
5.78_313.0717m/z	Tectochrysin	C16H12O4	5.77705	313.072	313.072	64.1	neg	M+HCOO	-0.110073	5281954	IRZVHDLBAYNPCT-UHFFFAOYSA-N	COC1=CC(=C2C(=C1)OC(=CC2=O)C3=CC=CC=C3)O	2.4	Phenylpropanoids and polyketides	Flavonoids	O-methylated flavonoids	109.0294 4678147.0938|313.0669 1858498.1250|159.0452 921418.6055|269.0834 644546.1445|151.0401 445055.6387	1.3806e+06
9.61_237.1495m/z	alpha-Ionone	C13H20O	9.61143	237.149	237.15	58.2	neg	M+HCOO	-0.667379	5282108	UZFLPKAIBPNNCA-BQYQJAHWSA-N	CC1=CCCC(C1C=CC(=O)C)(C)C	3	Lipids and lipid-like molecules	Prenol lipids	Sesquiterpenoids	237.1497 7662742.9063|193.1573 1144822.0156|123.0807 1050584.4531|167.0761 670194.1357|193.0869 603383.5605	3.97605e+06
8.07_669.1298m/z	Luteolin 7-diglucuronide	C27H26O18	8.06992	669.13	669.13	73.9	neg	M-H+CH3OH	-0.795076	5282153	PBBVWJQPAZYQDB-DBFWEQBMSA-N	C1=CC(=C(C=C1C2=CC(=O)C3=C(C=C(C=C3O2)OC4C(C(C(C(O4)C(=O)O)O)O)OC5C(C(C(C(O5)C(=O)O)O)O)O)O)O)O	-0.6	Phenylpropanoids and polyketides	Flavonoids	Flavonoid glycosides	339.0514 3502754.3750|321.0409 1436754.7813|109.0295 1195196.5977|185.0245 1068496.7813|295.0612 920219.0547	2.18422e+06
8.77_351.2182m/z	PGI2	C20H32O5	8.77277	351.218	351.217	77.38	neg	[M-H]1-	3.37105	5282411	KAQKFAOMNZTLHT-OZUDYXHBSA-N	CCCCCC(C=CC1C(CC2C1CC(=CCCCC(=O)O)O2)O)O	2.9	Lipids and lipid-like molecules	Fatty Acyls	Eicosanoids	351.2186 1966197.6250|85.0659 616571.2715|207.1391 376963.2070|350.2071 111256.5469|163.1126 67467.3594	647963
8.72_229.1446m/z	trans-2-Undecenoic acid	C11H20O2	8.71688	229.145	229.145	74.2	neg	M+HCOO	0.451967	5282728	IGBBVTAVILYDIO-MDZDMXLPSA-N	CCCCCCCCC=CC(=O)O	4.3	Lipids and lipid-like molecules	Fatty Acyls	Fatty acids and conjugates	229.1441 11845691.0000|211.1340 9008201.3750|167.1441 4797303.5313|130.0873 1085245.2578|228.1600 330094.0313	792516
8.00_329.2336m/z	FA 18:1+3O	C18H34O5	7.99973	329.233	329.233	82.07	neg	[M-H]-	0.904914	5282966	MDIUMSLCYIJBQC-BUHFOSPRSA-N	CCCCCC(C(C=CC(CCCCCCCC(=O)O)O)O)O	3.1	Lipids and lipid-like molecules	Fatty Acyls	Fatty acids and conjugates	329.2334 5194920.1250|201.1134 2158868.2031|171.1029 485600.9180|125.0971 379180.1328|127.1127 335110.2930	937668
9.36_227.1289m/z	Traumatic Acid	C12H20O4	9.36448	227.129	227.129	84.4	neg	M-H	0.191843	5283028	MAZWDMBCPDUFDJ-VQHVLOKHSA-N	C(CCCCC(=O)O)CCCC=CC(=O)O	3	Lipids and lipid-like molecules	Fatty Acyls	Fatty acids and conjugates	227.1287 4630418.5000|183.1392 3795311.8125|98.0010 538024.3125|209.1188 276121.4336|73.0295 181220.4688	541827
10.01_317.2126m/z	12-OxoETE	C20H30O3	10.0069	317.212	317.212	75.34	neg	[M-H]1-	1.32644	5283162	GURBRQGDZZKITB-VXBMJZGYSA-N	CCCCCC=CCC(=O)C=CC=CCC=CCCCC(=O)O	5.1	Lipids and lipid-like molecules	Fatty Acyls	Fatty acids and conjugates	317.2144 2983679.2813|273.2220 441806.6094|273.1769 366387.5859|130.0874 175335.2637|61.9883 30825.7754	2.13162e+06
12.66_289.1810m/z	Panaxynol	C17H24O	12.6611	289.181	289.181	42.9	neg	M+HCOO	0.179766	5283273	UGJAEDFOKNAMQD-KHPPLWFESA-N	CCCCCCCC=CCC#CC#CC(C=C)O	5.5	Lipids and lipid-like molecules	Fatty Acyls	Fatty alcohols	289.1808 363534.2656|160.8426 42492.2539|119.0861 18446.3633|61.9879 15402.6836|71.0499 14827.5986	49882.4
12.07_322.2742m/z	alpha-Linolenoyl Ethanolamide	C20H35NO2	12.0727	322.274	322.275	93.87	pos	[M+H]+	-1.55672	5283449	HBJXRRXWHSHZPU-PDBXOOCHSA-N	CCC=CCC=CCC=CCCCCCCCC(=O)NCCO	5	Organic nitrogen compounds	Organonitrogen compounds	Amines	62.0607 692933.0400|322.1000 197330.7500|322.2788 129864.7031|81.0705 111079.1016|95.0860 98595.2188	132183
6.21_413.1455m/z	Fusarenon-X	C17H22O8	6.20665	413.146	413.145	45.4	neg	M+CH3COO	0.674482	5284397	XGCUCFKWVIWWNW-ASESAZNFSA-N	CC1=CC2C(C(C1=O)O)(C3(C(C(C(C34CO4)O2)O)OC(=O)C)C)CO	-1.1	Lipids and lipid-like molecules	Prenol lipids	Sesquiterpenoids	57.0345 585567.6328|59.0138 574074.4482|99.0451 433911.2813|125.0242 171647.0313|101.0244 169424.5469	676657
6.97_607.2031m/z	Methyl hesperidin	C29H36O15	6.96723	607.203	607.202	41.7	pos	M+H-H2O	1.60302	5284419	GUMSHIGGVOJLBP-SLRPQMTOSA-N	CC1C(C(C(C(O1)OCC2C(C(C(C(O2)OC3=CC(=C4C(=O)CC(OC4=C3)C5=CC(=C(C=C5)OC)OC)O)O)O)O)O)O)O	-0.8	Phenylpropanoids and polyketides	Flavonoids	Flavonoid glycosides	327.0869 176927.9434|427.1391 145076.5996|445.1499 110438.4258|341.1029 101501.3545|365.1039 89322.3496	1.16532e+06
7.47_430.3317m/z	N-Oleoyl-Phenylalanine	C27H43NO3	7.46848	430.332	430.332	92.78	pos	[M+H]+	-0.987604	52922059	UWKNPULCJWBBDD-JRUKXMRZSA-N	CCCCCCCCC=CCCCCCCCC(=O)NC(CC1=CC=CC=C1)C(=O)O	8.6	Organic acids and derivatives	Carboxylic acids and derivatives	Amino acids, peptides, and analogues	430.3322 3152435.7813|395.0763 514194.4063|349.0703 469732.4688|367.0813 372960.5938|98.0967 330900.6250	270240
5.14_423.1411m/z	Tuberonic acid glucoside	C18H28O9	5.13935	423.141	423.143	68.9	neg	M+Cl	-4.20016	52922085	JFDNMLUPLXZXGV-YXDAKWILSA-N	C1CC(=O)C(C1CC(=O)O)CC=CCCOC2C(C(C(C(O2)CO)O)O)O	-1.2	Lipids and lipid-like molecules	Fatty Acyls	Fatty acyl glycosides	135.0451 1036096.4375|387.1207 651299.1094|261.1246 480980.7813|114.0559 262369.4111|161.0227 198425.9238	155892
7.33_571.2951m/z	1,3-Diacetylvilasinin	C30H40O7	7.33157	571.295	571.291	44.7	neg	M+CH3COO	7.51995	52952013	WGBLBVXSYGYVPN-VQDQNZKNSA-N	CC(=O)OC1CC(C2(C3CCC4(C(CC=C4C3(C(C5C2C1(CO5)C)O)C)C6=COC=C6)C)C)OC(=O)C	4.2	Lipids and lipid-like molecules	Prenol lipids	Triterpenoids	571.2889 16478.7930|120.0450 11908.6729|281.1320 7143.4585|77.6511 5053.0898|183.7153 4919.7813	234082
2.59_203.0562m/z	4,6-Dioxoheptanoic acid	C7H10O4	2.59495	203.056	203.056	68.8	neg	M+HCOO	0.5896	5312	WYEPBHZLDUPIOD-UHFFFAOYSA-N	CC(=O)CC(=O)CCC(=O)O	-0.8	Organic acids and derivatives	Keto acids and derivatives	Medium-chain keto acids and derivatives	185.0455 2321460.1406|141.0556 2229776.9453|203.0559 1313013.8750|113.0243 1010993.2539|125.0243 703142.7539	660499
9.28_243.1601m/z	Cis-5-Dodecenoic Acid	C12H22O2	9.2847	243.16	243.16	47.1	neg	M+HCOO	-0.219096	5312378	IJBFSOLHRKELLR-FPLPWBNLSA-N	CCCCCCC=CCCCC(=O)O	4	Lipids and lipid-like molecules	Fatty Acyls	Fatty acids and conjugates	243.1598 5075181.0625|225.1497 3366191.0000|198.1499 2239811.9063|181.1598 2131724.5469|61.9884 414228.8750	379950
7.77_327.1229m/z	Bisdemethoxycurcumin	C19H16O4	7.76657	327.123	327.123	39.9	pos	M+H2O+H	-1.10972	5315472	PREBVFJICNPEKM-YDWXAUTNSA-N	C1=CC(=CC=C1C=CC(=O)CC(=O)C=CC2=CC=C(C=C2)O)O	3.3	Phenylpropanoids and polyketides	Diarylheptanoids	Linear diarylheptanoids	309.0865 1869290.1250|123.0441 933801.7500|281.0916 682652.0781|327.0918 647717.6641|283.1326 602340.5156	120674
2.06_353.0885m/z	Caffeoyl quinic acid (isomer of 831, 832, 833)	C16H18O9	2.05808	353.087	353.086	89.66	neg	[M-H]-	2.06843	5315599	GYFFKZTYYAFCTR-DUXPYHPUSA-N	C1C(C(C(CC1(C(=O)O)O)O)OC(=O)C=CC2=CC(=C(C=C2)O)O)O	-0.4				191.0562 7721522.0625|85.0296 456636.3750|111.0087 218965.7100|93.0348 199947.0664|353.0749 158375.6563	707805
9.22_259.0611m/z	Clausenin	C14H12O5	9.2176	259.061	259.061	38.7	neg	M-H	-0.221113	5315948	XFSINVCSJTYZGH-UHFFFAOYSA-N	CC1(CC(=O)C2=C(O1)C=C3C(=C2O)C=CC(=O)O3)C	2.2	Phenylpropanoids and polyketides	Coumarins and derivatives	Pyranocoumarins	229.0137 8137390.6875|244.0371 4898199.7813|259.0585 509384.4375|215.1067 365383.2832|117.0340 325301.6250	426965
6.56_230.1177m/z	7-Demethylsuberosin	C14H14O3	6.56125	230.118	230.118	69.4	pos	M+NH4-H2O	-1.5356	5316525	FIDUIAPDSKSUGO-UHFFFAOYSA-N	CC(=CCC1=C(C=C2C(=C1)C=CC(=O)O2)O)C	3.5	Phenylpropanoids and polyketides	Coumarins and derivatives	Hydroxycoumarins	175.0391 6295667.5000|147.0441 2850866.0547|103.0545 861360.6250|203.0344 856393.0000|91.0546 472698.0938	128663
9.20_445.1495m/z	Desoxyrhaponticin	C21H24O8	9.20238	445.15	445.147	49.8	pos	M+H2O+Na	5.18649	5316606	MFMQRDLLSRLUJY-DXKBKAGUSA-N	COC1=CC=C(C=C1)C=CC2=CC(=CC(=C2)OC3C(C(C(C(O3)CO)O)O)O)O	1.4	Phenylpropanoids and polyketides	Stilbenes	Stilbene glycosides	327.0858 4157103.8750|427.1384 3998801.4063|365.1021 2031346.8750|409.1278 1839115.6250|383.1131 1728528.9844	1.84729e+06
1.47_319.1039m/z	Dianthoside	C12H16O8	1.4749	319.104	319.103	36.3	neg	M-H+CH3OH	3.53638	5316639	YGSIRXHFAUFUEJ-GPTQDWHKSA-N	CC1=C(C(=O)C=CO1)OC2C(C(C(C(O2)CO)O)O)O	-1.4	Organic oxygen compounds	Organooxygen compounds	Carbohydrates and carbohydrate conjugates	319.1046 1342825.2500|59.0138 980118.1172|71.0139 477309.3438|101.0243 287417.4063|150.0422 277680.6094	974668
6.97_431.0992m/z	Afzelin	C21H20O10	6.96815	431.099	431.098	75	neg	M-H	1.95196	5316673	SOSLMHZOJATCCP-AEIZVZFYSA-N	CC1C(C(C(C(O1)OC2=C(OC3=CC(=CC(=C3C2=O)O)O)C4=CC=C(C=C4)O)O)O)O	1.2	Phenylpropanoids and polyketides	Flavonoids	Flavonoid glycosides	327.0513 1372095.9063|431.0852 718081.7266|61.9883 530121.3750|299.0552 369284.3125|298.0472 326588.5938	170244
10.85_281.1183m/z	Dehydroeffusol	C17H14O2	10.8546	281.118	281.118	70.3	neg	M-H+CH3OH	2.22811	5316810	GSSPKCPIRDPBQE-UHFFFAOYSA-N	CC1=C(C=CC2=C1C=CC3=CC(=CC(=C32)C=C)O)O	4.9	Benzenoids	Phenanthrenes and derivatives	Phenanthrols	281.1186 1735592.8906|251.1077 1096847.2656|263.1077 493920.6875|222.0687 143596.0859|236.0840 135320.2500	164949
5.22_359.0778m/z	Nepetoidin B	C17H14O6	5.2238	359.078	359.077	47.7	neg	M+HCOO	1.85788	5316819	GFZFUVWXGQWUGX-DGEKEWMVSA-N	C1=CC(=C(C=C1C=CC(=O)OC=CC2=CC(=C(C=C2)O)O)O)O	2.8	Phenylpropanoids and polyketides	Cinnamic acids and derivatives	Hydroxycinnamic acids and derivatives	161.0243 4418121.1250|197.0455 1135829.7891|135.0452 831267.7422|133.0296 822222.2734|72.9931 658422.8125	149730
5.46_373.1499m/z	Eleutheroside B/Syringin	C17H24O9	5.46492	373.15	373.149	49.3	pos	M+H	1.65292	5316860	QJVXKWHHAMZTBY-GCPOEHJPSA-N	COC1=CC(=CC(=C1O[C@H]2[C@@H]([C@H]([C@@H]([C@H](O2)CO)O)O)O)OC)/C=C/CO	-1.3				170.0574 1725469.8359|86.0970 1566089.9219|179.0704 1309162.1719|211.0967 1137369.5313|193.0861 845217.5703	409485
8.38_315.0511m/z	Eupafolin	C16H12O7	8.37737	315.051	315.051	89.7	neg	M-H	0.133956	5317284	FHHSEFRSDKWJKJ-UHFFFAOYSA-N	COC1=C(C2=C(C=C1O)OC(=CC2=O)C3=CC(=C(C=C3)O)O)O	1.4	Phenylpropanoids and polyketides	Flavonoids	O-methylated flavonoids	315.0504 2416604.9453|300.0269 1723083.2910|161.0244 901031.4268|151.0035 401858.0303|107.0135 164223.0664	986376
7.15_593.1869m/z	Fortunellin	C28H32O14	7.15028	593.19	593.189	82.06	pos	[M+H]+	0.730535	5317385	MLWDGPFGTFOLRJ-CUVHLRMHSA-N	CC1C(C(C(C(O1)OC2C(C(C(OC2OC3=CC(=C4C(=C3)OC(=CC4=O)C5=CC=C(C=C5)OC)O)CO)O)O)O)O)O	0.1	Phenylpropanoids and polyketides	Flavonoids	Flavonoid glycosides	285.0786 252662.8125|447.1333 76947.2891|555.3438 58859.7461|493.1956 57378.4883|118.9923 53318.1484	8.5783e+06
6.47_596.1759n	Cassiaside C	C27H32O15	6.47322	595.169	595.167	51.1	neg	M-H, M+Cl	2.95052	5317701	GBGJNKYTLIUCMX-YUMVGKRXSA-N	CC1=CC2=CC3=CC(=CC(=C3C(=C2C(=O)O1)O)OC4C(C(C(C(O4)COC5C(C(C(C(O5)CO)O)O)O)O)O)O)OC	-0.6	Organoheterocyclic compounds	Naphthopyrans	Naphthopyranones	151.0036 1461805.5391|301.0716 1314979.4688|595.1671 1052323.1563|134.0372 362108.7617|107.0135 306758.6523	2.14773e+07
8.35_429.1199m/z	Glycyrrhiza flavonol A	C20H18O7	8.35265	429.12	429.119	85.2	neg	M+CH3COO	2.4103	5317765	UFWHTSBKDGUFOX-UHFFFAOYSA-N	CC1(C(CC2=C(O1)C=CC(=C2)C3=C(C(=O)C4=C(C=C(C=C4O3)O)O)O)O)C	2.9	Phenylpropanoids and polyketides	Flavonoids	Flavones	309.0396 2121751.8125|429.1168 1746058.8906|325.0711 1088112.3594|367.0812 634183.0078|311.0540 259980.6719	2.00895e+06
8.28_299.0562m/z	Hydroxygenkwanin	C16H12O6	8.28422	299.056	299.056	85.2	neg	M-H	0.391841	5318214	RRRSSAVLTCVNIQ-UHFFFAOYSA-N	COC1=CC(=C2C(=C1)OC(=CC2=O)C3=CC(=C(C=C3)O)O)O	1.7	Phenylpropanoids and polyketides	Flavonoids	O-methylated flavonoids	284.0323 3387195.9375|299.0575 2683195.2813|256.0376 973543.3828|281.1760 904230.8984|171.1031 167081.5156	2.79024e+06
2.06_326.1249m/z	Isohomoarbutin	C13H18O7	2.05808	326.125	326.124	73.4	neg	M-H+CH3CN	3.18649	5318573	XHEKEYHCIIMZRR-UJPOAAIJSA-N	CC1=C(C=CC(=C1)O)OC2C(C(C(C(O2)CO)O)O)O	-0.4	Organic oxygen compounds	Organooxygen compounds	Carbohydrates and carbohydrate conjugates	164.0718 9364166.4277|147.0453 2448671.4424|101.0243 1163636.6836|236.0932 709964.9375|206.0828 567287.6621	1.04879e+07
8.60_243.1026m/z	Isolinderalactone	C15H16O3	8.5954	243.103	243.103	90.8	neg	M-H	-0.384029	5318587	VXZIFOKTSURLNL-YDHLFZDLSA-N	CC1=COC2=C1C3C(C(=C)C(=O)O3)C(C2)(C)C=C	3	Organoheterocyclic compounds	Benzofurans		199.1125 23033372.5000|243.1020 17555668.1250|61.9880 819548.3750|169.1025 285380.5625|61.9819 130629.7344	1.71e+06
7.06_731.2047m/z	Isolugrandoside	C29H36O16	7.06173	731.205	731.204	35.8	neg	M+HCOOH+HCOO	1.10497	5318592	JOIWQICOBJLMOP-HPIISDRLSA-N	C1=CC(=C(C=C1CCOC2C(C(C(C(O2)COC3C(C(C(C(O3)CO)O)O)O)O)OC(=O)C=CC4=CC(=C(C=C4)O)O)O)O)O	-1	Phenylpropanoids and polyketides	Cinnamic acids and derivatives	Hydroxycinnamic acids and derivatives	295.0611 11238237.6250|193.0870 11102048.6250|185.0244 5758331.9531|109.0294 5729933.3750|237.0768 5011004.3594	3.39586e+06
5.30_421.0778m/z	Isomangiferin	C19H18O11	5.30365	421.078	421.078	76.5	neg	M-H	0.296909	5318597	CDYBOKJASDEORM-HBVDJMOISA-N	C1=C2C(=CC(=C1O)O)OC3=C(C2=O)C(=CC(=C3C4C(C(C(C(O4)CO)O)O)O)O)O	-0.4	Organoheterocyclic compounds	Benzopyrans	1-benzopyrans	271.0245 1399079.9766|301.0353 1335332.5000|258.0168 952606.6484|421.0739 886834.0938|331.0461 882002.2578	255031
6.93_330.1475n	Lactiflorasyne	C19H22O5	6.93263	361.166	361.165	53.2	neg	M-H, M-H+CH3OH	2.4124	5318915	RYAXKMRZPSXCFZ-UHFFFAOYSA-N	CC#CC#COC1=CC2(CCC(CO2)OC(=O)CC(C)C)C3C1O3	2.6	Lipids and lipid-like molecules	Fatty Acyls	Fatty acid esters	361.1659 2763237.3750|135.0453 716305.5000|165.0557 537688.7988|161.0231 478122.8047|122.0372 412009.2500	398808
7.41_677.2447m/z	Icariin	C33H40O15	7.41177	677.245	677.244	99.1	pos	M+H	1.00394	5318997	TZJALUIVHRYQQB-XLRXWWTNSA-N	CC1C(C(C(C(O1)OC2=C(OC3=C(C2=O)C(=CC(=C3CC=C(C)C)OC4C(C(C(C(O4)CO)O)O)O)O)C5=CC=C(C=C5)OC)O)O)O	1.7	Phenylpropanoids and polyketides	Flavonoids	Flavonoid glycosides	313.0705 6345074.0000|369.1332 6086407.3125|531.1872 1186860.3281|85.0289 1113127.6777|71.0497 1005667.4414	1.04827e+06
11.79_322.1439m/z	Licoflavone A	C20H18O4	11.7935	322.144	322.144	39.1	pos	M+NH4-H2O	-1.33898	5319000	HJGURBGBPIKRER-UHFFFAOYSA-N	CC(=CCC1=CC2=C(C=C1O)OC(=CC2=O)C3=CC=C(C=C3)O)C	5.2	Phenylpropanoids and polyketides	Flavonoids	Flavones	277.0844 286594.4492|322.0994 240156.0625|321.0931 134543.1563|307.0839 122001.2578|249.0919 91016.7920	146481
6.84_429.1197m/z	Licofuranocoumarin	C21H20O7	6.84047	429.12	429.119	74.3	neg	M+HCOO	1.62628	5319001	GAUFLNQQCSXBPK-UHFFFAOYSA-N	CC(C)(C1CC2=C(O1)C=C3C(=C2OC)C=C(C(=O)O3)C4=C(C=C(C=C4)O)O)O	2.8	Phenylpropanoids and polyketides	Isoflavonoids	Hydroxyisoflavonoids	109.0295 4598909.5000|385.1304 2418203.5000|429.1179 1633573.8750|108.0216 1579178.0000|341.1407 1539923.0625	1.16727e+06
10.91_191.1066m/z	Ligustilide	C12H14O2	10.9091	191.107	191.107	93.4	pos	M+H	-0.265309	5319022	IQVQXVFMNOFTMU-FLIBITNWSA-N	CCCC=C1C2=C(C=CCC2)C(=O)O1	2.7	Organoheterocyclic compounds	Isobenzofurans		191.1070 13309919.5000|173.0961 4044724.3125|145.1011 2325976.4219|91.0546 2166496.7617|117.0700 1728851.5938	1.36006e+06
7.81_643.1506m/z	Limocitrol 3-glucoside	C24H26O14	7.81347	643.151	643.152	53.6	neg	M+CH3COOH+HCOO	-1.69639	5319025	PRBUAZIWXABBBW-BFECWXROSA-N	COC1=C(C=CC(=C1)C2=C(C(=O)C3=C(C(=C(C(=C3O2)OC)O)OC)O)O[C@@H]4C(C([C@@H]([C@H](O4)CO)O)O)O)O	0.6	Phenylpropanoids and polyketides	Flavonoids	Flavonoid glycosides	295.0613 1407120.6152|179.0350 638618.1758|347.0768 606091.5015|109.0295 553917.2227|197.0457 408147.1768	2.00862e+06
6.23_419.1709m/z	Lithospermidin B	C21H24O7	6.23042	419.171	419.171	56.9	neg	M-H+CH3OH	0.747634	5319057	YEXHSSJAIYSMOW-BQYQJAHWSA-N	CC(C)CC(=O)OC(C=CC(C)(C)O)C1=CC(=O)C2=C(C=CC(=C2C1=O)O)O	3.2				175.0399 4810562.8125|197.0455 1516683.1094|419.1719 1106906.4375|135.0451 996861.7500|72.9932 884921.6328	232799
7.90_447.1290m/z	3'-MethoxyPuerarin	C22H22O10	7.8993	447.129	447.129	44.5	pos	M+H	0.848353	5319485	HQQUZVFMUSCUJS-PGPONNFDSA-N	COC1=C(C=CC(=C1)C2=COC3=C(C2=O)C=CC(=C3[C@H]4[C@@H]([C@H]([C@@H]([C@H](O4)CO)O)O)O)O)O	0	Phenylpropanoids and polyketides	Isoflavonoids	Isoflavonoid C-glycosides	411.1070 506238.8633|271.0600 498062.5391|367.0809 418475.3047|136.0617 416032.6680|343.0810 380881.4492	180745
7.97_411.1089m/z	Neoglycyrol	C21H18O6	7.97377	411.109	411.108	51.6	neg	M+HCOO	1.04627	5320083	LWESBHWAOZORCQ-UHFFFAOYSA-N	CC(=CCC1=C(C2=C(C=C1O)OC(=O)C3=C2OC4=C3C=CC(=C4)O)OC)C	4.7	Phenylpropanoids and polyketides	Isoflavonoids	Coumestans	367.1202 1320713.8594|411.0695 811851.4141|309.0403 750186.6016|96.9601 329583.8438|279.0662 303968.1621	274298
6.18_233.0455m/z	Armillarisin A	C12H10O5	6.17882	233.046	233.046	54.9	neg	M-H	-0.17073	5320192	XVZWWNMZVZWQKU-UHFFFAOYSA-N	CC(=O)C1=CC2=C(C=C(C=C2OC1=O)O)CO	0.6	Phenylpropanoids and polyketides	Coumarins and derivatives	Hydroxycoumarins	233.0454 2950877.7500|135.0451 776749.9648|145.0295 631173.0625|134.0373 409548.1250|190.0267 407998.8438	344239
8.72_261.1130m/z	Osthenol	C14H14O3	8.71688	261.113	261.113	72.8	neg	M-H+CH3OH	1.48618	5320318	RAKJVIPCCGXHHS-UHFFFAOYSA-N	CC(=CCC1=C(C=CC2=C1OC(=O)C=C2)O)C	3.5	Phenylpropanoids and polyketides	Coumarins and derivatives	Hydroxycoumarins	261.1127 2988253.4063|217.1242 505430.6563|243.1026 331869.0234|260.1007 247346.3281|199.1135 217798.9004	473969
9.77_389.1232m/z	Artemetin	C20H20O8	9.76572	389.123	389.123	85.8	pos	M+H	0.186211	5320351	RIGYMJVFEJNCKD-UHFFFAOYSA-N	COC1=C(C=C(C=C1)C2=C(C(=O)C3=C(C(=C(C=C3O2)OC)OC)O)OC)OC	3.4	Phenylpropanoids and polyketides	Flavonoids	O-methylated flavonoids	389.1227 3297533.8750|331.0810 973274.3750|356.0881 775531.1563|313.0706 700701.9453|374.0995 259939.7734	446530
7.68_313.0719m/z	Pectolinarigenin	C17H14O6	7.6789	313.072	313.072	85.7	neg	M-H	0.410021	5320438	GPQLHGCIAUEJQK-UHFFFAOYSA-N	COC1=CC=C(C=C1)C2=CC(=O)C3=C(O2)C=C(C(=C3O)OC)O	2	Phenylpropanoids and polyketides	Flavonoids	O-methylated flavonoids	298.0486 4898688.3125|313.0723 4865748.6250|297.0405 595736.4375|109.0295 320250.7305|134.0372 303731.8438	170454
6.70_430.3319m/z	Peiminine	C27H43NO3	6.6967	430.332	430.332	98.5	pos	M+H	0.708533	5320446	IQDIERHFZVCNRZ-GAJVHJNZSA-N	CC1CCC2C(C3CCC4C(C3CN2C1)CC5C4CC(=O)C6C5(CCC(C6)O)C)(C)O	3.9				412.3214 13589365.2500|430.3320 11591710.2500|136.0623 324403.5313|98.0965 247378.3438|147.0442 245697.4219	1.2326e+06
5.53_361.0934m/z	Pendulone	C17H16O6	5.52637	361.093	361.093	63.5	neg	M+HCOO	1.48632	5320464	SHZOHJDZQPQBSW-UHFFFAOYSA-N	COC1=C(C(=O)C(=CC1=O)C2CC3=C(C=C(C=C3)O)OC2)OC	1.8	Phenylpropanoids and polyketides	Isoflavonoids	Isoflavanquinones	151.0352 510581.7617|361.0858 507747.3125|123.0412 250853.6309|155.1078 226100.0869|209.0824 161764.4707	89866.1
10.40_297.1134m/z	Magnaldehyde B	C18H16O3	10.4002	297.113	297.113	70.2	neg	M-H+H2O	2.57232	5320888	CWLSQIXOLLQBDC-HWKANZROSA-N	C=CCC1=CC(=C(C=C1)O)C2=C(C=CC(=C2)C=CC=O)O	3.8	Benzenoids	Benzene and substituted derivatives	Biphenyls and derivatives	297.1128 5295732.4583|266.0941 1323705.0000|267.1021 1230991.4948|296.1044 1148171.5339|296.1893 703694.3594	4.50343e+06
6.70_258.0888n	Rhapontigenin	C15H14O4	6.6967	300.123	300.124	38	pos	M+H2O+H, M+CH3CN+H	-1.70326	5320954	PHMHDRYYFAYWEG-NSCUHMNNSA-N	COC1=C(C=C(C=C1)C=CC2=CC(=CC(=C2)O)O)O	3.1	Phenylpropanoids and polyketides	Stilbenes		147.0441 4049901.2344|163.0391 2885696.4531|121.0650 2040380.7266|300.1212 1507411.6875|283.1075 974867.7500	591570
11.14_485.2545m/z	Surangin A	C27H36O5	11.1445	485.255	485.254	45.6	neg	M+HCOO	0.0785785	5321563	HTVCZGDEKPMUHH-GHRIWEEISA-N	CCCC1=CC(=O)OC2=C1C(=C(C(=C2C(=O)C(C)CC)O)CC=C(C)CCC=C(C)C)O	7.5	Lipids and lipid-like molecules	Prenol lipids	Terpene lactones	397.2752 277881.8555|441.2543 126002.0059|321.2588 68164.4395|153.0556 58004.7607|109.0654 48352.9258	128801
8.44_281.0819m/z	Tanshinlactone	C17H12O3	8.43515	281.082	281.081	35.5	neg	M-H+H2O	2.01076	5321617	VDYMGLBSIBHGCP-UHFFFAOYSA-N	CC1=C2C=CC3=C(C2=CC=C1)C(=O)OC4=C3OC=C4C	4.1	Lipids and lipid-like molecules	Steroids and steroid derivatives	Oxasteroids and derivatives	281.0800 1199232.9844|266.0581 718278.2969|196.0532 307870.7422|237.1476 180050.2988|164.0719 156652.4844	76996
7.60_491.1196m/z	Tilianin	C22H22O10	7.59563	491.12	491.119	63	neg	M+HCOO	0.160756	5321954	NLZCOTZRUWYPTP-MIUGBVLSSA-N	COC1=CC=C(C=C1)C2=CC(=O)C3=C(C=C(C=C3O2)OC4C(C(C(C(O4)CO)O)O)O)O	0.3	Phenylpropanoids and polyketides	Flavonoids	Flavonoid glycosides	293.0450 8755016.8750|329.0666 5371237.5000|313.0350 4624486.8750|491.1151 2466532.6875|328.0591 1789685.3750	529732
6.88_317.0671m/z	toralactone	C15H12O5	6.88045	317.067	317.067	65	neg	M+HCOO	1.57163	5321980	WEHXAEGTVPWKDY-UHFFFAOYSA-N	CC1=CC2=CC3=CC(=CC(=C3C(=C2C(=O)O1)O)O)OC	3.3	Organoheterocyclic compounds	Naphthopyrans	Naphthopyranones	317.0686 2453541.0938|258.0532 2242538.9531|215.0349 487880.7227|158.0615 316435.5313|243.0296 309498.3477	453200
6.53_329.0305m/z	Lupinalbin A	C15H8O6	6.52622	329.031	329.03	66.6	neg	M+HCOO	0.825465	5324349	BBBAWACESCACAP-UHFFFAOYSA-N	C1=CC2=C(C=C1O)OC3=C2C(=O)C4=C(C=C(C=C4O3)O)O	3.2	Phenylpropanoids and polyketides	Isoflavonoids	Isoflav-2-enes	311.0196 7698669.3750|329.0297 5013410.1250|285.0384 1239735.1250|133.0295 1159424.3203|176.9830 525797.3633	1.17707e+06
9.64_267.1599m/z	Carabrol	C15H22O3	9.63928	267.16	267.16	59.4	neg	M-H+H2O	1.20082	53323204	FDFBRCKWUMZDTG-AYWPFRTFSA-N	C[C@H]1[C@H]2C[C@@H]3[C@](O3)([C@H](C[C@@H]4[C@](O4)(C[C@@H]2OC1=O)C)O)C	2.9				267.1578 1454590.1875|223.1703 1307534.4844|59.0138 302967.1250|205.1599 216035.0928|193.1019 169319.1563	278471
5.06_337.0568m/z	Planchol E	C14H12O7	5.06368	337.057	337.056	50.2	neg	M+HCOO	0.93418	53350155	OLEZSRAOQOUXOE-HVEUFLKGSA-N	CC12C(CC(=O)O1)C3C(O2)C(=O)C4=C(C=C(C=C4O3)O)O	1.2	Organoheterocyclic compounds	Benzopyrans	1-benzopyrans	161.0610 961518.9922|135.0452 747173.4648|72.9931 691848.0625|187.0764 610172.5664|337.0530 507082.3125	434636
11.46_317.2127m/z	Tetrachyrin	C20H28O2	11.4573	317.213	317.212	86.2	neg	M-H+H2O	3.54066	53463660	ZPJLCCRNYWMMRT-UHFFFAOYSA-N	CC12CCCC3(C1CCC45C3(CCC(C4)C(=C)C5)C)OC2=O	4.4	Organoheterocyclic compounds	Naphthofurans		317.2122 31655323.0000|316.2002 437615.5000|209.9062 63593.5195|258.1585 61348.8281|61.9883 52863.2383	2.20889e+06
13.49_271.2277m/z	Myristoleic Acid Methyl Ester	C15H28O2	13.4908	271.228	271.227	59.4	neg	M-H+CH3OH	1.50735	5352674	RWIPSJUSVXDVPB-SREVYHEPSA-N	CCCCC=CCCCCCCCC(=O)OC	5.4	Lipids and lipid-like molecules	Fatty Acyls	Fatty acid esters	271.2274 324875.6875|225.2225 170690.8516|61.9880 15225.4893|223.2070 8616.2148|271.0663 8274.1563	48758.6
7.09_188.0838n	3-Butylidenephthalide	C12H12O2	7.08755	189.091	189.091	72	pos	M+H-H2O, M+H	0.15044	5352899	WMBOCUXXNSOQHM-DHZHZOJOSA-N	CCCC=C1C2=CC=CC=C2C(=O)O1	3.2	Organoheterocyclic compounds	Isocoumarans	Isobenzofuranones	171.0806 1839495.5000|143.0855 994748.6406|153.0698 934315.2109|147.0556 888885.3438|128.0621 764666.8125	485568
5.16_237.0404m/z	5,7-Dihydroxy-4-methylcoumarin	C10H8O4	5.1641	237.04	237.04	81	neg	M+HCOO	-0.218577	5354284	QNVWGEJMXOQQPM-UHFFFAOYSA-N	CC1=CC(=O)OC2=CC(=CC(=C12)O)O	1.1	Phenylpropanoids and polyketides	Coumarins and derivatives	Hydroxycoumarins	149.0608 33966652.2500|193.0508 19150775.3750|164.0718 1374856.0781|134.0373 1004480.6406|148.0536 796386.0625	3.22692e+06
6.96_209.0809m/z	Methyl 4-hydroxy-3-methoxycinnamate	C11H12O4	6.95662	209.081	209.081	41.3	pos	M+H	0.5225	5357283	AUJXJFHANFIVKH-GQCTYLIASA-N	COC1=C(C=CC(=C1)C=CC(=O)OC)O	1.8	Phenylpropanoids and polyketides	Cinnamic acids and derivatives	Hydroxycinnamic acids and derivatives	153.0547 1658367.7832|149.0605 1359082.0430|191.1065 1267448.5430|163.1113 1209826.9961|177.0548 1132299.2656	1.60095e+06
6.66_239.0923m/z	Nectriapyrone	C11H14O3	6.65888	239.092	239.093	47.9	neg	M+HCOO	-0.830571	5358550	NRLCQITWKJENAT-FNORWQNLSA-N	CC=C(C)C1=CC(=C(C(=O)O1)C)OC	2.5	Organoheterocyclic compounds	Pyrans	Pyranones and derivatives	195.1024 530834.7754|59.0137 396590.9375|139.0763 354255.0000|239.0977 232158.8594|177.0918 168823.6738	227824
6.93_447.1287m/z	Biochanin-7-O-glucoside	C22H22O10	6.92548	447.129	447.128	97.07	pos	[M+H]+	0.394385	5358913	LFEUICHQZGNOHD-UHFFFAOYSA-N	COC1=CC=C(C=C1)C2=COC3=CC(=CC(=C3C2=O)O)OC4C(C(C(C(O4)CO)O)O)O	1.2				271.0598 4970706.9375|411.1075 2053490.0000|343.0807 1843077.7031|313.0709 1110445.3906|367.0811 785636.0469	554097
12.77_324.2897m/z	Linolenic acid ethyl ester	C20H34O2	12.7712	324.29	324.29	39.6	pos	M+NH4	0.0256222	5367460	JYYFMIOPGOFNPK-AGRJPVHOSA-N	CCC=CCC=CCC=CCCCCCCCC(=O)OCC	6.6	Lipids and lipid-like molecules	Fatty Acyls	Lineolic acids and derivatives	62.0607 470337.3862|324.2888 141974.8828|67.0548 84772.3418|81.0703 82841.3037|95.0859 70864.6147	260397
7.64_253.1445m/z	trans-3-Oxo-alpha-ionol	C13H20O2	7.63593	253.144	253.145	46	neg	M+HCOO	-0.351779	5370052	MDCGEAGEQVMWPE-AATRIKPKSA-N	CC1=CC(=O)CC(C1C=CC(C)O)(C)C	1.6	Lipids and lipid-like molecules	Prenol lipids	Sesquiterpenoids	253.1453 4579572.8438|59.0138 4157065.0703|193.0720 1139665.7500|123.0817 541655.8750|179.1081 405776.8125	384955
7.17_219.0663m/z	Vinyl Cinnamate	C11H10O2	7.16862	219.066	219.066	36.5	neg	M+HCOO	0.0843184	5371819	WGXGKXTZIQFQFO-CMDGGOBGSA-N	C=COC(=O)C=CC1=CC=CC=C1	3.1	Phenylpropanoids and polyketides	Cinnamic acids and derivatives	Cinnamic acid esters	175.0765 2857567.2969|219.0663 936376.5352|161.0244 747686.9492|59.0140 725624.9121|146.0373 613407.1934	1.04557e+06
7.19_284.1281m/z	Coumaroyl tyramine	C17H17NO3	7.18557	284.128	284.129	66.85	pos	[M+H]+	-1.90043	5372945	RXGUTQNKCXHALN-BJMVGYQFSA-N	C1=CC(=CC=C1CCNC(=O)C=CC2=CC=C(C=C2)O)O	2.7	Phenylpropanoids and polyketides	Cinnamic acids and derivatives	Hydroxycinnamic acids and derivatives	147.0440 58065506.2500|121.0650 27759945.5000|284.1280 15085688.0000|119.0493 10160011.3125|91.0545 4541837.0000	3.96512e+06
3.13_312.1218n	Triandrin	C15H20O7	3.1336	371.136	371.135	47.9	neg	M+Cl, M+CH3COO	2.78315	53730504	CNNXMGXBAZQZDE-UXXRCYHCSA-N	C1=CC(=CC=C1C=CCOC2C(C(C(C(O2)CO)O)O)O)O	-0.4	Lipids and lipid-like molecules	Fatty Acyls	Fatty acyl glycosides	59.0137 703564.2119|281.1026 380703.3770|311.1124 72981.9702|208.0616 62278.0527|187.0767 40930.8008	1.47493e+06
10.15_401.2699m/z	Grifolin monomethyl ether	C23H34O2	10.1545	401.27	401.27	58.8	neg	M+CH3COO	0.673447	5373218	OJJOUHFECGXRFJ-NWLVNBMCSA-N	CC1=CC(=C(C(=C1)OC)CC=C(C)CCC=C(C)CCC=C(C)C)O	7.5	Lipids and lipid-like molecules	Prenol lipids	Sesquiterpenoids	371.2596 405129.5391|137.0606 311378.6992|358.2388 219808.9688|353.2497 91598.1953|401.2649 66349.8125	44525.5
8.31_205.0507m/z	4-Acetoxycinnamic acid	C11H10O4	8.31145	205.051	205.051	73.6	neg	M-H	0.318029	5373941	BYHBHNKBISXCEP-QPJJXVBHSA-N	CC(=O)OC1=CC=C(C=C1)C=CC(=O)O	1.6	Phenylpropanoids and polyketides	Cinnamic acids and derivatives	Cinnamic acids	161.0244 22678636.7500|133.0294 5057053.0938|205.0474 2116596.0469|135.0451 1823975.0469|147.0449 809133.3359	1.19078e+06
9.83_315.0863m/z	3,7-Dihydroxy-3',4'-dimethoxyflavone	C17H14O6	9.83067	315.086	315.086	97.07	pos	[M+H]+	-0.175873	5378832	LTSJJOKAWSCMBC-UHFFFAOYSA-N		2.6	Phenylpropanoids and polyketides	Flavonoids	Flavones	315.0861 4212151.5625|300.0629 2075509.7461|272.0678 1261478.9092|60.0450 436011.1953|95.0856 202604.5137	966275
8.23_329.0669m/z	Jaceosidin	C17H14O7	8.23215	329.067	329.067	82.9	neg	M-H	0.636961	5379096	GLAAQZFBFGEBPS-UHFFFAOYSA-N	COC1=C(C=CC(=C1)C2=CC(=O)C3=C(O2)C=C(C(=C3O)OC)O)O	1.7	Phenylpropanoids and polyketides	Flavonoids	O-methylated flavonoids	329.0665 3862098.5000|299.0198 3456347.6875|314.0431 2355370.1719|271.0243 1347223.8203|328.2213 965068.0625	1.15164e+06
7.58_179.0715m/z	Lachnophyllum lactone	C10H10O2	7.58243	179.071	179.071	49	neg	M-H+H2O	4.39534	5380632	ZNOFNADHELRFDF-KRIUCBPDSA-N	CC=CC#CC=C1C=CC(=O)O1	2.1	Organoheterocyclic compounds	Dihydrofurans	Furanones	59.0138 3094913.6680|164.0479 2456854.6563|71.0139 1891227.6016|135.0452 1353220.4375|179.0678 667326.8438	84381.5
5.04_214.1086m/z	Rengynic acid	C8H14O4	5.03902	214.109	214.108	51.7	neg	M-H+CH3CN	3.86135	54033324	LHDVONJKFJRQTI-UHFFFAOYSA-N	C1CC(CCC1O)(CC(=O)O)O	0.1	Organic oxygen compounds	Organooxygen compounds	Alcohols and polyols	142.1236 1478734.3516|171.0927 1270643.0000|92.0506 1078472.2500|116.0504 1065444.6250|86.0248 1044492.1875	346860
10.17_347.1999m/z	15,16-Dihydroxyoctadeca-9Z,12Z-dienoic acid	C18H32O4	10.1676	347.2	347.199	41.4	neg	M+Cl	1.43175	54038189	LKLLJYJTYPVCID-UHFFFAOYSA-N	CCC(C(CC=CCC=CCCCCCCCC(=O)O)O)O	4.1	Lipids and lipid-like molecules	Fatty Acyls	Lineolic acids and derivatives	311.2226 471893.7344|347.1835 184636.5625|293.2109 116354.1426|61.9883 95286.5391|59.0140 48958.4219	1.41048e+06
1.68_224.0566m/z	Theobromine	C7H7N4O2	1.6837	224.057	224.055	35.4	neg	M+HCOO	8.26494	5429	YAPQBXQYLJRXSA-UHFFFAOYSA-N	CN1C=NC2=C1C(=O)NC(=O)N2C	-0.8	Organoheterocyclic compounds	Imidazopyrimidines	Purines and purine derivatives	153.0554 1796640.5000|180.0664 1735027.0391|59.0138 1163746.7793|121.0294 1155985.6250|181.0987 901205.0625	428096
0.85_294.1192m/z	Castanospermine	C8H15NO4	0.84635	294.119	294.12	40.9	neg	M+CH3COOH+HCOO	-1.22433	54445	JDVVGAQPNNXQDW-TVNFTVLESA-N	C1CN2CC(C(C(C2C1O)O)O)O	-2.2	Organoheterocyclic compounds	Indolizidines		114.0560 2105932.1094|59.0138 1982121.2500|71.0138 1406063.1250|89.0244 1073856.6250|113.0230 517747.8711	381865
3.14_208.1334m/z	MEX_208.1332_16.9	C12H17NO2	3.13697	208.133	208.134	67.58	pos	[M+H]+	-1.59818	54461473	XBXKOKJLEVOCTF-UHFFFAOYSA-N		2.4				208.1337 2641706.6563|131.0491 971080.9961|103.0545 927839.8213|107.0493 688348.7598|60.0815 401858.0391	1.14887e+06
11.65_233.1536m/z	(+)-Costunolide	C15H20O2	11.6462	233.154	233.154	92.48	pos	[M+H]+	0.0802347	5458201	HRYLQFBHBWLLLL-IKTIWSOHSA-N	CC1=CCCC(=CC2C(CC1)C(=C)C(=O)O2)C	2.1	Lipids and lipid-like molecules	Prenol lipids	Terpene lactones	233.1534 2556653.5781|215.1436 282771.1777|145.1015 189123.7500|131.0856 166544.4219|79.0547 150469.2500	327391
6.88_477.1196m/z	Regaloside B	C20H26O11	6.88045	477.12	477.117	52	neg	M+Cl	5.9844	5459143	YQKQOLPNKNHLBO-KRJCNZRASA-N	CC(=O)OCC(COC(=O)C=CC1=CC=C(C=C1)O)OC2C(C(C(C(O2)CO)O)O)O	-0.5	Lipids and lipid-like molecules	Glycerolipids	Glycosylglycerols	295.0612 1374218.8594|109.0294 1266002.8281|185.0245 863960.8438|135.0452 305915.5322|159.0453 305099.4229	163681
0.83_503.1614m/z	Manninotriose	C18H32O16	0.825233	503.161	503.162	95.1	neg	M-H	-0.671597	5461026	FZWBNHMXJMCXLU-YRBKNLIBSA-N	C(C1C(C(C(C(O1)OCC2C(C(C(C(O2)OCC(C(C(C(C=O)O)O)O)O)O)O)O)O)O)O)O	-7.2	Lipids and lipid-like molecules	Fatty Acyls	Fatty acyl glycosides	59.0138 560762.3750|179.0560 331922.0020|71.0139 328930.5313|89.0245 267371.0000|101.0243 248606.5313	1.08707e+06
5.26_347.0776m/z	Eriodictyol chalcone	C15H12O6	5.26452	347.078	347.077	42.9	neg	M+CH3COO	1.31199	5461154	CRBYNQCDRNZCNX-DUXPYHPUSA-N	C1=CC(=C(C=C1C=CC(=O)C2=C(C=C(C=C2O)O)O)O)O	2.9	Phenylpropanoids and polyketides	Linear 1,3-diarylpropanoids	Chalcones and dihydrochalcones	347.0686 533242.9375|193.0504 422017.0732|59.0138 281522.4063|123.0452 256563.1406|109.0293 251747.6167	134877
4.20_297.1559m/z	Huperzine B	C16H20N2O	4.20187	297.156	297.158	64.8	pos	M+H2O+Na	-7.58527	5462442	YYWGABLTRMRUIT-HWWQOWPSSA-N	CC1=CC2CC3=C(C=CC(=O)N3)C4(C1)C2CCCN4	0.6	Organoheterocyclic compounds	Phenanthrolines		297.1557 2044209.6042|132.0809 1950392.7331|192.1021 1177213.2604|279.1458 827758.3444|219.1130 312435.6328	2.35161e+06
8.10_355.0829m/z	6-Deoxyisojacareubin	C18H14O5	8.09678	355.083	355.082	48.1	neg	M+HCOO	1.80638	5464641	XWRLBJDPJRDNKF-UHFFFAOYSA-N	CC1(C=CC2=C(O1)C=C(C3=C2OC4=C(C3=O)C=CC=C4O)O)C	3.7	Organoheterocyclic compounds	Benzopyrans	1-benzopyrans	355.0830 1082529.6094|340.0591 602809.4531|297.0402 540600.7656|325.0356 352565.4141|130.0874 138163.8594	281244
0.96_207.0510m/z	Erythorbic Acid	C6H8O6	0.95595	207.051	207.05	49.9	neg	M-H+CH3OH	2.97434	54675810	CIWBSHSKHKDKBQ-DUZGATOHSA-N	C(C(C1C(=C(C(=O)O1)O)O)O)O	-1.6	Organoheterocyclic compounds	Dihydrofurans	Furanones	80.9652 1052774.8750|59.0139 774190.0156|129.0192 504111.9746|133.0142 484932.0625|117.0193 471594.6563	1.27711e+06
3.57_225.0405m/z	3,4,8-Trihydroxycoumarin	C9H6O5	3.57178	225.04	225.04	50.7	neg	M-H+CH3OH	2.77677	54690528	OJIYXYUCRVFSRV-UHFFFAOYSA-N	C1=CC2=C(C(=C1)O)OC(=O)C(=C2O)O	0.8	Phenylpropanoids and polyketides	Coumarins and derivatives	Hydroxycoumarins	179.0350 455817.7500|105.0345 332612.1709|225.0401 264790.1563|207.0298 186921.3125|166.0258 181464.0039	136769
0.88_337.0776m/z	2-O-alpha-D-Glucopyranosyl-L-ascorbic acid	C12H18O11	0.882917	337.078	337.078	51.7	neg	M-H	-0.0818762	54693473	MLSJBGYKDYSOAE-DCWMUDTNSA-N	C(C1C(C(C(C(O1)OC2=C(C(OC2=O)C(CO)O)O)O)O)O)O	-3.1	Lipids and lipid-like molecules	Fatty Acyls	Fatty acyl glycosides	337.0760 917864.3984|111.0086 592941.7031|128.0352 286217.5938|174.0167 142773.0781|181.0717 139293.5313	120546
6.94_225.1122m/z	Pogostone	C12H16O4	6.93633	225.112	225.112	65.3	pos	M+H	0.452347	54695756	AJFJTORMMHWKFW-UHFFFAOYSA-N	CC1=CC(=C(C(=O)O1)C(=O)CCC(C)C)O	2.6	Organic oxygen compounds	Organooxygen compounds	Carbonyl compounds	207.1013 1637414.4063|99.0445 641170.1855|93.0703 576405.9219|224.1291 490804.9375|91.0546 412590.5625	163132
7.28_715.1740m/z	Narcissoside	C28H32O16	7.28088	715.174	715.173	60.7	neg	M+HCOOH+HCOO	1.98025	5481663	UIDGLYUNOUKLBM-GEBJFKNCSA-N	CC1C(C(C(C(O1)OCC2C(C(C(C(O2)OC3=C(OC4=CC(=CC(=C4C3=O)O)O)C5=CC(=C(C=C5)O)OC)O)O)O)O)O)O	-1	Phenylpropanoids and polyketides	Flavonoids	Flavonoid glycosides	335.0557 814700.9063|135.0450 811391.0469|185.0242 777315.0957|293.0447 766346.9375|321.0399 760009.5703	196340
8.01_443.0989m/z	Semilicoisoflavone B	C20H16O6	8.01323	443.099	443.098	40.4	neg	M+HCOOH+HCOO	1.53757	5481948	LWZACZCRAUQSLH-UHFFFAOYSA-N	CC1(C=CC2=C(O1)C(=CC(=C2)C3=COC4=CC(=CC(=C4C3=O)O)O)O)C	3.6	Phenylpropanoids and polyketides	Isoflavonoids	Pyranoisoflavonoids	399.1086 1232296.0703|298.0483 809796.8906|309.0409 716112.9844|325.0727 549695.1719|297.0406 470854.8438	7.53735e+06
9.52_513.1768m/z	Mulberrin	C25H26O6	9.5184	513.177	513.177	52.7	neg	M+HCOOH+HCOO	0.323008	5481958	UWQYBLOHTQWSQD-UHFFFAOYSA-N	CC(=CCC1=C2C(=C(C=C1O)O)C(=O)C(=C(O2)C3=C(C=C(C=C3)O)O)CC=C(C)C)C	6.2	Phenylpropanoids and polyketides	Flavonoids	Flavones	513.1737 1886819.4688|351.0875 1119809.6875|366.1112 840122.6563|323.0963 772846.4453|279.0295 343399.4336	458746
7.14_591.1735m/z	Ikarisoside A	C26H28O10	7.14227	591.174	591.172	79	neg	M+HCOOH+HCOO	3.24462	5481982	RPLMLWBOUPDPQF-GULSFEPBSA-N	CC1C(C(C(C(O1)OC2=C(OC3=C(C(=CC(=C3C2=O)O)O)CC=C(C)C)C4=CC=C(C=C4)O)O)O)O	3.1	Phenylpropanoids and polyketides	Flavonoids	Flavonoid glycosides	59.0138 361516.3125|591.1743 273441.2109|323.0571 197279.4844|308.0275 188345.5742|427.0978 121476.8438	1.60283e+06
5.34_365.0523m/z	Ethyl brevifolincarboxylate	C15H12O8	5.34082	365.052	365.051	56.3	neg	M+HCOO	2.84069	5487248	JSEPSLOCPQODTM-UHFFFAOYSA-N	CCOC(=O)C1CC(=O)C2=C1C3=C(C(=C(C=C3C(=O)O2)O)O)O	0.3	Phenylpropanoids and polyketides	Isocoumarins and derivatives		321.0619 695097.5703|59.0138 400404.3750|365.0516 374425.3633|203.0353 355538.9980|189.0195 348779.1797	233607
6.65_713.1232m/z	Clerodendrin	C27H26O17	6.64635	713.123	713.12	65.1	neg	M+HCOOH+HCOO	4.06694	5488004	SJFTVAAHLRFBST-DBFWEQBMSA-N	C1=CC(=CC=C1C2=CC(=O)C3=C(C=C(C=C3O2)OC4C(C(C(C(O4)C(=O)O)O)O)OC5C(C(C(C(O5)C(=O)O)O)O)O)O)O	-0.2	Phenylpropanoids and polyketides	Flavonoids	Flavonoid glycosides	293.0444 2118912.1250|319.0248 1149924.7500|109.0294 1055519.6289|321.0403 942739.8750|339.0514 791384.2891	1.78779e+06
7.17_731.1688m/z	Astragaloside	C28H32O17	7.16862	731.169	731.167	65.6	neg	M+HCOOH+HCOO	1.89746	5488387	GPZLFWVUSQREQH-QDYVESOYSA-N	COC1=C(C=CC(=C1)C2=C(C(=O)C3=C(C=C(C=C3O2)O)O)OC4C(C(C(C(O4)COC5C(C(C(C(O5)CO)O)O)O)O)O)O)O	-1.5	Phenylpropanoids and polyketides	Flavonoids	Flavonoid glycosides	335.0562 1174831.1094|293.0452 1014937.7979|135.0451 957570.2383|533.1083 887552.8438|185.0245 743681.4805	891267
9.51_515.1918m/z	Baohuoside I	C27H30O10	9.51383	515.192	515.191	93.6	pos	M+H	1.17626	5488822	NGMYNFJANBHLKA-LVKFHIPRSA-N	CC1C(C(C(C(O1)OC2=C(OC3=C(C(=CC(=C3C2=O)O)O)CC=C(C)C)C4=CC=C(C=C4)OC)O)O)O	3.5	Phenylpropanoids and polyketides	Flavonoids	Flavonoid glycosides	369.1331 2096259.9688|313.0705 2006467.9063|162.0912 884415.5781|105.0338 837851.4766|71.0497 418894.6563	693184
5.86_577.1590m/z	Vitexin rhamnoside	C27H30O14	5.85528	577.159	577.156	44.4	neg	M-H	4.75455	5488886	ZIIBNXKQZAUBRD-VVZHCWMZSA-N	CC1C(C(C(C(O1)OC2=CC=C(C=C2)C3=CC(=O)C4=C(O3)C(=C(C=C4O)O)C5C(C(C(C(O5)CO)O)O)O)O)O)O	-1.1	Phenylpropanoids and polyketides	Flavonoids	Flavonoid glycosides	293.0412 16606.4961|209.9007 14368.3223|577.1553 12607.4404|274.9170 6124.9380|441.2778 5697.6172	325552
7.60_299.0199m/z	Demethylwedelolactone	C15H8O7	7.59563	299.02	299.02	80.7	neg	M-H	0.624091	5489605	LUTYTNLPIUCKBJ-UHFFFAOYSA-N	C1=C(C=C2C(=C1O)C3=C(C4=CC(=C(C=C4O3)O)O)C(=O)O2)O	2.1	Phenylpropanoids and polyketides	Isoflavonoids	Coumestans	299.0176 2423550.3438|271.0241 1741982.5469|199.0399 270777.3984|130.0872 217048.6250|133.0292 186800.1328	219234
6.40_433.0785m/z	avicularin	C20H18O11	6.39555	433.079	433.078	49.4	neg	M-H	1.99393	5490064	BDCDNTVZSILEOY-UXYNSRGZSA-N	C1=CC(=C(C=C1C2=C(C(=O)C3=C(C=C(C=C3O2)O)O)OC4C(C(C(O4)CO)O)O)O)O	1	Phenylpropanoids and polyketides	Flavonoids	Flavonoid glycosides	61.9882 589121.8125|59.0137 273249.4746|286.0847 249105.7090|127.0398 181974.6641|300.0280 181714.7500	146870
6.98_731.1691m/z	herbacetin-3,8-diglucopyranoside	C27H30O17	6.98072	731.169	731.167	53.9	neg	M+CH3COOH+HCOO	2.44612	5491604	VMOKZQAQPBUNRW-PXJYGDGDSA-N	C1=CC(=CC=C1C2=C(C(=O)C3=C(O2)C(=C(C=C3O)O)OC4C(C(C(C(O4)CO)O)O)O)OC5C(C(C(C(O5)CO)O)O)O)O	-1.4	Phenylpropanoids and polyketides	Flavonoids	Flavonoid glycosides	335.0554 29448026.5000|533.1071 19562982.0000|353.0663 18594821.3750|135.0449 18038203.4375|185.0242 16482644.8438	1.18889e+07
6.71_607.1663m/z	Complanatuside	C28H32O16	6.70843	607.166	607.166	54.1	pos	M+H-H2O	0.81827	5492406	KKPKUPKKMALLKG-QDYVESOYSA-N	COC1=CC(=C2C(=C1)OC(=C(C2=O)OC3C(C(C(C(O3)CO)O)O)O)C4=CC=C(C=C4)OC5C(C(C(C(O5)CO)O)O)O)O	-0.8	Phenylpropanoids and polyketides	Flavonoids	Flavonoid glycosides	343.0818 26615.0215|461.1105 23631.4668|70.0658 22214.8223|86.0967 16869.6191|131.0496 14219.6582	240925
7.61_415.1040m/z	Puerarin	C21H20O9	7.60765	415.102	415.101	89.51	neg	[M-H]-	1.41476	5538727	HKEAFJYKMMKDOR-SZCFVHRKSA-N	C1=CC(=CC=C1C2=COC3=C(C2=O)C=CC(=C3C4C(C(C(C(O4)CO)O)O)O)O)O	0	Phenylpropanoids and polyketides	Isoflavonoids	Isoflavonoid C-glycosides	311.0560 3842504.6250|415.1001 1942905.6250|133.0295 617528.5391|135.0451 562313.3730|179.0352 533559.6680	706034
2.66_156.0656m/z	Trigonelline	C7H7NO2	2.66438	156.066	156.066	41.3	pos	M+H2O+H	-3.60267	5570	WWNNZCOKKKDOPX-UHFFFAOYSA-N	C[N+]1=CC=CC(=C1)C(=O)[O-]	1.2	Alkaloids and derivatives			110.0240 1961553.5586|114.0553 1405140.9661|84.0450 1365005.3815|138.0549 818930.2109|156.0660 731525.8984	697978
4.88_293.1240m/z	Glutamylphenylalanine	C14H18N2O5	4.87778	293.124	293.124	60.29	neg	[M-H]-	-0.912558	558649	XHHOHZPNYFQJKL-UHFFFAOYSA-N	C1=CC=C(C=C1)CC(C(=O)O)NC(=O)CCC(C(=O)O)N	-3	Organic acids and derivatives	Carboxylic acids and derivatives	Amino acids, peptides, and analogues	293.1233 13809054.9766|131.0711 6618292.1191|59.0137 4035594.5938|71.0137 1715092.7031|85.0657 1074299.3247	3.58665e+06
9.01_121.0650m/z	Tyramine	C8H11NO	9.00715	121.064	121.064	66.62	pos	[M+H-NH3]+	1.39116	5610	DZGWFCGJZKJUFP-UHFFFAOYSA-N	C1=CC(=CC=C1CCN)O	1.1	Benzenoids	Benzene and substituted derivatives	Phenethylamines	121.0650 1151304.4453|93.0703 755954.4004|103.0546 665634.6719|91.0546 529546.9531|77.0391 412961.5957	64726.6
4.71_151.0436m/z	3-(Methylthio)propionic acid	C4H8O2S	4.70807	151.044	151.043	38.5	neg	M-H+CH3OH	5.55084	563	CAOMCZAIALVUPA-UHFFFAOYSA-N	CSCCC(=O)O	0.4	Lipids and lipid-like molecules	Fatty Acyls	Fatty acids and conjugates	151.0409 4110710.1563|136.0165 2053933.4766|107.0502 1280325.1250|79.9573 1248002.8750|108.0450 1085231.0000	11315.3
5.38_649.2767m/z	Valeriotriate B	C27H42O12	5.377	649.277	649.27	40	neg	M+HCOOH+HCOO	9.69852	56674823	LUDMVJVLHCEECS-UHFFFAOYSA-N	CC(C)CC(=O)OC1C2C(CC(C2(COC(=O)C)O)O)(C(=CO1)COC(=O)C(C(C)C)OC(=O)CC(C)C)O	1.5	Organic acids and derivatives	Carboxylic acids and derivatives	Tetracarboxylic acids and derivatives	59.0137 1353925.6250|649.2745 1140703.6719|71.0137 825524.5625|89.0243 704678.7500|209.0818 503700.7188	748459
1.09_342.1201m/z	Picraquassioside D	C13H18O8	1.09168	342.12	342.119	51.6	neg	M-H+CH3CN	4.04155	56776291	SJBWDSQCMPAGHA-UHFFFAOYSA-N	COC1=CC(=CC(=C1)O)OC2C(C(C(C(O2)CO)O)O)O	-0.9	Organic oxygen compounds	Organooxygen compounds	Carbohydrates and carbohydrate conjugates	180.0666 5092823.3750|101.0244 764074.5762|163.0401 754969.1484|59.0138 517768.4063|119.0505 455985.4785	396739
9.07_209.1184m/z	Desoxo-narchinol A	C12H16O2	9.06832	209.118	209.118	75.4	neg	M-H+H2O	3.56657	56835056	YWSIMWUTQXMOSD-FXAINCCUSA-N	CC1CCC=C2C1(C(C=CC2=O)O)C	2	Organic oxygen compounds	Organooxygen compounds	Carbonyl compounds	209.1184 6426876.0625|165.1283 970030.1484|95.0502 674388.0234|164.1160 598391.5625|163.1128 345368.5313	1.07904e+06
7.01_225.1133m/z	Narchinol B	C12H16O3	7.00853	225.113	225.113	46.9	neg	M-H+H2O	3.12124	56835095	MPVZRKBKGSHLGP-FCMYFTRRSA-N	CC1CC(C=C2C1(C(C=CC2=O)O)C)O	0.7	Organic oxygen compounds	Organooxygen compounds	Carbonyl compounds	125.0972 1763505.5967|225.1154 818974.9707|181.1236 484493.8926|137.0973 247331.7764|163.1127 173939.9944	480596
5.78_369.1811m/z	Perakine	C21H22N2O3	5.77878	369.181	369.181	59.5	pos	M+H2O+H	-1.08137	56927765	GDXJMOGWONJRHL-FXRWJBKJSA-N	CC1C(C2CC3N1C4C2C(C5(C4)C3=NC6=CC=CC=C56)OC(=O)C)C=O	1.6	Alkaloids and derivatives	Ajmaline-sarpagine alkaloids		369.1810 21366070.0000|160.0757 8306592.9375|267.1494 3318064.8125|201.1021 2008371.8906|108.0811 1765532.8359	2.0299e+06
8.73_341.1035m/z	Przewaquinone C	C18H16O4	8.72885	341.104	341.103	48.2	neg	M+HCOO	1.51978	56967683	JVRKHBLVECIWMZ-SFHVURJKSA-N	CC1=COC2=C1C(=O)C(=O)C3=C2C=CC4=C3CCCC4(C)O	2.2				341.1129 569490.3125|253.1255 220318.6074|282.0913 207935.3945|161.0604 190640.5156|267.0693 166399.7578	155935
12.12_321.2442m/z	7,15-Isopimaradiene-1,19-diol	C20H32O2	12.1177	321.244	321.243	43.4	neg	M-H+H2O	4.18828	56970840	UHNMVCWNKMIXPZ-AXGBLAMUSA-N	CC1(CCC2C(=CCC3C2(C(CCC3(C)CO)O)C)C1)C=C	4	Lipids and lipid-like molecules	Prenol lipids	Diterpenoids	321.2461 1741618.6875|289.1813 53156.3428|78.9591 41595.4414|261.2225 21950.1895|277.2141 17105.5762	78110
6.97_433.1133m/z	3'-hydroxyPuerarin	C21H20O10	6.96723	433.113	433.113	55.7	pos	M+H	0.859117	5748205	GARZMRVWLORUSR-VPRICQMDSA-N	C1=CC(=C(C=C1C2=COC3=C(C2=O)C=CC(=C3C4C(C(C(C(O4)CO)O)O)O)O)O)O	-0.3	Phenylpropanoids and polyketides	Isoflavonoids	Isoflavonoid C-glycosides	433.1096 856969.1172|397.0919 447333.6953|313.0756 405875.3906|343.0810 341124.2031|271.0591 331898.6836	473362
5.73_579.1377m/z	Cuneatin 7-glucoside	C23H22O11	5.72585	579.138	579.135	55.3	neg	M+CH3COOH+HCOO	4.5448	57503892	KHFXUOGFTOMBAZ-YQUCMGFWSA-N	COC1=CC2=C(C=C1C3=COC4CC(CCC4C3=O)OC5C(C(C(C(O5)CO)O)O)O)OCO2	0.1				359.0982 78652.8984|197.0455 78376.8174|135.0448 55850.0742|175.0393 53889.2051|173.0238 45258.7227	526831
8.85_330.1826n	(8S,9S,10R,11S,13S,14S,17R)-11,17-dihydroxy-17-(2-hydroxyacetyl)-10,13-dimethyl-2,6,7,8,9,11,12,14,15,16-decahydro-1H-cyclopenta[a]phenanthren-3-one	C21H30O5	8.84918	363.217	363.217	97.15	pos	[M+H]+	-1.57237	5754	JYGXADMDTFJGBT-VWUMJDOOSA-N	CC12CCC(=O)C=C1CCC3C2C(CC4(C3CCC4(C(=O)CO)O)C)O	1.6	Lipids and lipid-like molecules	Steroids and steroid derivatives	Hydroxysteroids	257.1902 532260.8047|121.0650 248531.5625|69.0705 155592.5273|161.1334 125353.0830|159.1167 116170.3672	1.07739e+06
10.96_271.1701m/z	beta-Estradiol	C18H24O2	10.9572	271.17	271.171	75.34	neg	[M-H]-	-0.906138	5757	VOXZDWNPVJITMN-ZBRFXRBCSA-N	CC12CCC3C(C1CCC2O)CCC4=C3C=CC(=C4)O	4	Lipids and lipid-like molecules	Steroids and steroid derivatives	Estrane steroids	271.1695 1105390.8008|241.1621 485201.5881|270.2165 91895.8555|227.1803 43632.0591|199.0761 37492.2041	462109
2.10_485.1882m/z	Thymidine	C10H14N2O5	2.10382	485.188	485.188	41.7	pos	2M+H	0.774332	5789	IQFYYKKMVGJFEH-XLPZGREQSA-N	CC1=CN(C(=O)NC1=O)C2CC(C(O2)CO)O	-1.2	Nucleosides, nucleotides, and analogues	Pyrimidine nucleosides	Pyrimidine 2'-deoxyribonucleosides	127.0503 1552023.8711|117.0549 144067.0781|70.0656 95611.4844|99.0445 73220.9141|81.0338 71396.0078	522917
0.89_150.0763m/z	L-Hydroxyproline	C5H9NO3	0.885483	150.076	150.077	69.3	pos	M+H2O+H	-2.83462	5810	PMMYEEVYMWASQN-DMTCNVIQSA-N	C1C(CNC1C(=O)O)O	-3.3	Organic acids and derivatives	Carboxylic acids and derivatives	Amino acids, peptides, and analogues	72.0449 1062327.9941|132.0655 890090.3984|60.0450 453328.7188|114.0551 227338.2500|150.0759 224917.7969	183285
10.51_287.1652m/z	Aquacrine	C18H22O2	10.5066	287.165	287.165	50.6	neg	M-H+H2O	1.89918	5870	DNXHEGUUPJUMQT-CBZIJGRNSA-N	CC12CCC3C(C1CCC2=O)CCC4=C3C=CC(=C4)O	3.1	Lipids and lipid-like molecules	Steroids and steroid derivatives	Estrane steroids	287.1610 675700.3203|143.0694 372990.6152|257.1539 338598.5273|157.0869 96093.3003|128.0627 86751.2393	580394
0.73_147.0890n	L-lysine	C6H14N2O2	0.727367	147.113	147.113	93.69	pos	[M+H]+	-3.66094	5962	KDXKERNSBIXSRK-YFKPBYRVSA-N	C(CCN)CC(C(=O)O)N	-3	Organic acids and derivatives	Carboxylic acids and derivatives	Amino acids, peptides, and analogues	84.0812 23841323.1875|130.0863 5576189.7969|147.1125 539347.7461|67.0546 288788.3936|56.0500 254098.3516	1.48846e+06
6.91_433.1512m/z	Chavibetol	C20H22O7	6.9063	433.151	433.15	79.5	neg	M+CH3COO	2.3101	596375	NPBVQXIMTZKSBA-UHFFFAOYSA-N	COC1=C(C=C(C=C1)CC=C)O	2	Benzenoids	Phenols	Methoxyphenols	433.1499 2061841.2813|373.1295 1069584.0000|138.0321 561617.8125|358.1055 469198.0078|61.9882 464472.5313	836972
0.93_112.0508m/z	Cytosine	C4H5N3O	0.926083	112.051	112.051	91.4	pos	M+H	2.64679	597	OPTASPLRGRRNAP-UHFFFAOYSA-N	C1=C(NC(=O)N=C1)N	-1.7	Organoheterocyclic compounds	Diazines	Pyrimidines and pyrimidine derivatives	112.0507 123417421.5000|95.0243 22278513.7344|69.0453 6751457.7266|94.0404 6462487.0000|95.0605 2498012.1328	4.79586e+06
5.29_342.1703m/z	Phellodendrine chloride	C20H24ClNO4	5.29068	342.17	342.17	88.6	pos	M+?	1.57954	59818	DGLDSNPMIYUWGN-OOJQBDKLSA-N	C[N+]12CCC3=CC(=C(C=C3C1CC4=CC(=C(C=C4C2)OC)O)O)OC.[Cl-]	2.6	Alkaloids and derivatives	Protoberberine alkaloids and derivatives		192.1019 29194099.5000|342.1687 9377033.5000|177.0786 4021904.3438|86.0970 2787176.1133|116.0709 1519046.7500	1.71896e+06
0.85_342.1166n	Sucrose	C12H22O11	0.84635	377.086	377.086	73.4	neg	M+Cl, M+CH3COO, M-H+H2O, M-H	1.0851	5988	CZMRCDWAGMRECN-UGDNZRGBSA-N	C(C1C(C(C(C(O1)OC2(C(C(C(O2)CO)O)O)CO)O)O)O)O	-3.7	Organic oxygen compounds	Organooxygen compounds	Carbohydrates and carbohydrate conjugates	59.0138 42748020.4375|341.1092 24974213.5000|71.0138 22603366.6875|89.0244 20248052.3438|179.0561 9559753.0625	2.95609e+07
4.81_297.1346m/z	Toxin T2 tetrol	C15H22O6	4.81453	297.135	297.134	38.2	neg	M-H	0.814175	599328	ZAXZBJSXSOISTF-UHFFFAOYSA-N	CC1=CC2C(CC1O)(C3(C(C(C(C34CO4)O2)O)O)C)CO	-2.1	Lipids and lipid-like molecules	Prenol lipids	Sesquiterpenoids	297.1391 371435.0781|114.0557 70573.3047|113.0607 63032.4453|59.0138 45972.4961|297.0703 41934.2461	506784
8.93_303.2318m/z	17-Methyltestosterone	C20H30O2	8.93067	303.232	303.229	97.17	pos	[M+H]+	8.54055	6010	GCKMFJBGXUYNAG-HLXURNFRSA-N	CC12CCC(=O)C=C1CCC3C2CCC4(C3CCC4(C)O)C	3.4	Lipids and lipid-like molecules	Steroids and steroid derivatives	Androstane steroids	173.1325 1895897.7031|257.1899 1336726.4531|285.1827 661823.4531|145.1011 651701.4648|131.0855 573247.3008	77491.4
5.13_206.0460m/z	7-Deoxyechinosporin	C10H9NO4	5.12817	206.046	206.046	51.4	neg	M-H	0.530144	60208857	NBVNAFAEYGKTPJ-UHFFFAOYSA-N	C1=CC2C3C1C(OC(=C3)C(=O)N)OC2=O	0.1	Organoheterocyclic compounds	Lactones	Delta valerolactones	162.0560 8977294.0000|206.0462 2670331.5000|163.0374 2411941.7500|135.0450 1010653.6875|147.0321 970480.1563	442704
7.23_281.1394m/z	Spirodionic acid	C15H20O4	7.23122	281.139	281.139	59.5	neg	M-H+H2O	1.90333	60208865	LFDLVXYMKUPPOT-UHFFFAOYSA-N	CCC1=C(C(=O)C(CC12C(CCC2=O)C(=O)O)C)C	1.1	Lipids and lipid-like molecules	Prenol lipids	Monoterpenoids	281.1417 902408.8750|119.0501 321470.5313|237.1516 223667.1563|263.1284 209404.1895|219.1396 197058.6738	474883
4.85_165.0433n	3,4-Dihydroxy-L-phenylalanine	C9H11NO4	4.85163	196.061	196.061	54.97	neg	[M-H]-	4.19103	6047	WTDRDQBEARUVNC-LURJTMIESA-N	C1=CC(=C(C=C1CC(C(=O)O)N)O)O	-2.7	Organic acids and derivatives	Carboxylic acids and derivatives	Amino acids, peptides, and analogues	94.0297 9350736.3945|122.0611 1648502.1973|151.0402 658481.7256|66.0349 650658.6973|124.0402 549717.0615	1.08781e+06
1.09_180.0667m/z	L-Tyrosine	C9H11NO3	1.09168	180.067	180.067	86.8	neg	M-H	0.588526	6057	OUYCCCASQSFEME-QMMMGPOBSA-N	C1=CC(=CC=C1CC(C(=O)O)N)O	-2.3	Organic acids and derivatives	Carboxylic acids and derivatives	Amino acids, peptides, and analogues	180.0666 22036652.5000|163.0396 10667469.8125|59.0138 9595912.0000|119.0503 7948721.6875|71.0139 7018907.0000	1.80403e+06
1.73_267.0973n	ADENOSINE	C10H13N5O4	1.73085	326.111	326.11	63.1	neg	M+Cl, M+CH3COO	1.96827	60961	OIRDTQYFTABQOQ-KQYNXXCUSA-N	C1=NC(=C2C(=N1)N(C=N2)C3C(C(C(O3)CO)O)O)N	-1.1	Nucleosides, nucleotides, and analogues	Purine nucleosides		134.0471 9728226.5625|59.0138 640729.1973|180.0668 391200.3418|266.0877 320077.2500|325.1086 295478.0000	5.79335e+06
1.15_132.1019m/z	L-Leucine	C6H13NO2	1.14975	132.102	132.102	95.3	pos	M+H	0.126757	6106	ROHFNLRQFUQHCH-YFKPBYRVSA-N	CC(C)CC(C(=O)O)N	-1.5	Organic acids and derivatives	Carboxylic acids and derivatives	Amino acids, peptides, and analogues	86.0968 326998766.4375|69.0705 31511689.3438|132.1017 4160840.4271|57.0581 670939.9583|87.0269 618502.8750	2.49454e+08
10.66_291.1955m/z	Sclareolide	C16H26O2	10.6594	291.195	291.193	45.5	pos	M+H2O+Na	7.48627	61129	IMKJGXCIJJXALX-UHFFFAOYSA-N	CC1(CCCC2(C1CCC3(C2CC(=O)O3)C)C)C	4.3				291.1956 1098119.2188|273.1851 1037482.1719|107.0496 459782.7422|79.0547 363888.7227|81.0705 329004.7617	1.62707e+06
8.37_287.2006m/z	4-Androstene-3,17-dione	C19H26O2	8.37348	287.201	287.201	97.17	pos	[M+H]+	0.0235868	6128	AEMFNILZOJDQLW-QAGGRKNESA-N	CC12CCC(=O)C=C1CCC3C2CCC4(C3CCC4=O)C	2.7	Lipids and lipid-like molecules	Steroids and steroid derivatives	Androstane steroids	287.1994 1303533.9844|287.0536 998154.6875|241.1961 519413.2930|95.0860 416865.4844|81.0705 210644.2002	186980
11.88_381.2063m/z	3-n-Butylphathlide	C12H14O2	11.8787	381.206	381.206	49.7	pos	2M+H	0.678591	61361	HJXMNVQARNZTEE-UHFFFAOYSA-N	CCCCC1C2=CC=CC=C2C(=O)O1	2.8	Organoheterocyclic compounds	Benzofurans	Benzofuranones	191.1066 1002626.0703|173.0961 143681.0686|91.0546 67092.5508|145.1012 64279.1855|335.2012 58829.3674	606021
1.06_148.0437m/z	L-Methionine	C5H11NO2S	1.05943	148.044	148.044	57.9	neg	M-H	-0.413251	6137	FFEARJCKVFRZRR-BYPYZUCNSA-N	CSCCC(C(=O)O)N	-1.9	Organic acids and derivatives	Carboxylic acids and derivatives	Amino acids, peptides, and analogues	129.0200 2273906.1914|85.0294 979337.3320|133.0154 701069.3750|101.0240 587187.9414|103.0414 586051.2715	257129
1.97_166.0624n	L-Phenylalanine	C9H11NO2	1.96922	166.086	166.087	81.1	pos	[M+H]+	-3.53598	6140	COLNVLDHVKWLRT-QMMMGPOBSA-N	C1=CC=C(C=C1)CC(C(=O)O)N	-1.5	Organic acids and derivatives	Carboxylic acids and derivatives	Amino acids, peptides, and analogues	120.0809 1969841880.1250|103.0546 172230939.2422|131.0491 46174653.4375|107.0494 40165480.9375|166.0859 39318784.5156	2.5987e+08
0.93_244.0929m/z	Cytidine	C9H13N3O5	0.926083	244.093	244.093	93	pos	M+H	0.582018	6175	UHDGCWIWMRVCDJ-XVFCMESISA-N	C1=CN(C(=O)N=C1N)C2C(C(C(O2)CO)O)O	-2.1	Nucleosides, nucleotides, and analogues	Pyrimidine nucleosides		112.0508 392859750.0000|95.0245 6351297.5000|209.9270 2762969.2500|69.0453 2522628.2500|70.0659 2258636.5000	2.00526e+07
6.85_341.1399m/z	Przewaquinone A	C19H18O4	6.85382	341.14	341.139	57.4	neg	M-H+CH3OH	3.16368	619402	CEHVTERMWMYLCP-UHFFFAOYSA-N	CC1(CCCC2=C1C=CC3=C2C(=O)C(=O)C4=C3OC=C4CO)C	3.1	Lipids and lipid-like molecules	Prenol lipids	Diterpenoids	341.1392 1697522.9531|311.0923 1452607.1719|326.1170 1056546.8125|283.0974 713605.0391|269.0453 198120.0117	118557
7.06_185.0244m/z	Psoralen (Ficusin)	C11H6O3	7.06173	185.024	185.024	55	neg	M-H	-0.000523503	6199	ZCCUUQDIBDJBTK-UHFFFAOYSA-N	C1=CC(=O)OC2=CC3=C(C=CO3)C=C21	2.3	Phenylpropanoids and polyketides	Coumarins and derivatives	Furanocoumarins	185.0242 7530916.5000|157.0294 1671543.8750|129.0344 1574684.7500|141.0919 898584.5117|147.0450 481719.0352	121816
7.41_316.2038n	Norethisterone / norethindrone	C20H26O2	7.41177	299.201	299.201	93.89	pos	[M+H]+	-0.129986	6230	VIKNJXKGJWUCNN-XGXHKTLJSA-N	CC12CCC3C(C1CCC2(C#C)O)CCC4=CC(=O)CCC34	3	Lipids and lipid-like molecules	Steroids and steroid derivatives	Estrane steroids	299.2016 837906.7500|107.0495 666296.9336|253.1964 403815.3750|299.0606 327837.9375|107.0855 200152.0625	551392
0.83_181.0718m/z	Mannitol	C6H14O6	0.825233	181.072	181.072	92.6	neg	M-H	-0.0426089	6251	FBPFZTCFMRRESA-KVTDHHQDSA-N	C(C(C(C(C(CO)O)O)O)O)O	-3.1	Organic oxygen compounds	Organooxygen compounds	Carbohydrates and carbohydrate conjugates	181.0717 11243414.8958|59.0138 8275703.5000|71.0138 7940765.0833|101.0244 5581536.3698|89.0244 3050498.3939	1.26493e+07
0.79_131.0463m/z	L-Asparagine	C4H8N2O3	0.79455	131.046	131.046	75.48	neg	[M-H]-	0.303128	6267	DCXYFEDJOCDNAF-REOHCLBHSA-N	C(C(C(=O)O)N)C(=O)N	-3.4	Organic acids and derivatives	Carboxylic acids and derivatives	Amino acids, peptides, and analogues	88.0402 5623420.0000|114.0196 1822002.5000|115.0034 1445383.0000|71.0143 1106192.5625|113.0354 1092288.4531	137965
10.78_392.1721m/z	Latifoline	C20H27NO7	10.7786	392.172	392.171	37.5	neg	M-H	1.47456	6269253	LZKFLVDOCDILCY-VZUCSPMQSA-N	CC=C(C)C(=O)OC1CCN2C1C(=CC2)COC(=O)C3(C(C(=O)OC3C)C)O	0.9	Alkaloids and derivatives			329.1759 567953.2422|61.9883 317923.5938|391.2761 72473.0234|311.2220 61044.3828|59.0139 58003.4570	73114.5
0.76_156.0768m/z	L-Histidine	C6H9N3O2	0.7555	156.077	156.077	92.7	pos	[M+H]+	0.559543	6274	HNDVDQJCIGZPNO-YFKPBYRVSA-N	C1=C(NC=N1)CC(C(=O)O)N	-3.2	Organic acids and derivatives	Carboxylic acids and derivatives	Amino acids, peptides, and analogues	110.0714 15544430.3750|156.0767 2549298.1484|95.0607 1045010.5000|83.0608 1009679.3750|93.0451 726455.5625	393467
9.80_221.1547m/z	Damascenone	C13H18O	9.8044	221.155	221.154	36.7	neg	M-H+CH3OH	2.82728	62775	POIARNZEYGURDG-UHFFFAOYSA-N	C/C=C/C(=O)C1=C(C=CCC1(C)C)C	3.2	Organic oxygen compounds	Organooxygen compounds	Carbonyl compounds	221.1550 3278600.6563|59.0138 2253016.8633|220.1467 496995.4688|161.0455 362143.2969|177.0915 340955.0820	23947.1
7.38_336.1228m/z	Norboldine	C18H19NO4	7.37798	336.123	336.12	57.2	pos	M+Na	6.88537	628557	KYVJVURXKAZJRK-UHFFFAOYSA-N	COC1=C(C=C2CC3C4=C(C2=C1)C(=C(C=C4CCN3)O)OC)O	2.3				336.1228 79039181.9722|320.0915 28717335.4444|292.0965 26304202.6389|321.0970 23345342.0486|306.0757 8339370.7813	1.9607e+08
0.93_118.0864m/z	L-Valine	C5H11NO2	0.926083	118.086	118.086	78	pos	M+H	1.57338	6287	KZSNJWFQEVHDMF-BYPYZUCNSA-N	CC(C)C(C(=O)O)N	-2.3	Organic acids and derivatives	Carboxylic acids and derivatives	Amino acids, peptides, and analogues	118.0863 107400272.2500|72.0813 36637576.0000|59.0736 17296788.3750|58.0658 15440089.7500|55.0549 5212897.5000	4.73958e+07
0.81_118.0509m/z	L-Threonine	C4H9NO3	0.814067	118.051	118.051	78.9	neg	M-H	-0.177703	6288	AYFVYJQAPQTCCC-GBXIJSLDSA-N	CC(C(C(=O)O)N)O	-2.9	Organic acids and derivatives	Carboxylic acids and derivatives	Amino acids, peptides, and analogues	74.0248 3697215.7500|118.0509 891866.9961|59.0138 655408.8125|71.0137 306167.3125|73.0294 239762.7656	198927
7.37_271.0609m/z	alizarin	C14H8O4	7.37177	271.061	271.061	51.5	neg	M-H+CH3OH	0.891191	6293	RGCKGOZRHPZPFP-UHFFFAOYSA-N	C1=CC=C2C(=C1)C(=O)C3=C(C2=O)C(=C(C=C3)O)O	3.2	Benzenoids	Anthracenes	Anthraquinones	271.0576 736314.0000|256.0371 616549.2031|239.0351 248660.7422|83.0503 238651.5234|227.1683 134701.7031	40060.6
9.08_343.1176m/z	6-Demethoxytangeretin	C19H18O6	9.08433	343.118	343.118	90.5	pos	M+H	-0.186423	629964	DDGJUTBQQURRGE-UHFFFAOYSA-N	COC1=CC=C(C=C1)C2=CC(=O)C3=C(O2)C(=C(C=C3OC)OC)OC	3.1	Phenylpropanoids and polyketides	Flavonoids	O-methylated flavonoids	343.1194 5548558.9375|313.0707 4917099.0625|240.2321 985319.1250|285.0758 959134.5391|153.0182 841649.5586	649579
1.81_252.1091m/z	Cordycepin	C10H13N5O3	1.81352	252.109	252.109	55.2	pos	M+H	0.103131	6303	OFEZSBMBBKLLBJ-BAJZRUMYSA-N	C1C(OC(C1O)N2C=NC3=C(N=CN=C32)N)CO	-1.2	Nucleosides, nucleotides, and analogues	Purine nucleosides	Purine 3'-deoxyribonucleosides	136.0603 12656493.5125|120.0809 2399639.0125|195.1127 2269531.4000|70.0657 1088736.7813|166.0879 841486.1359	1.13558e+08
8.60_373.1284m/z	Isosinensetin	C20H20O7	8.60222	373.128	373.128	96.2	pos	M+H	0.619569	632135	UYCWETIUOAGWIL-UHFFFAOYSA-N	COC1=C(C=C(C=C1)C2=CC(=O)C3=C(O2)C(=C(C=C3OC)OC)OC)OC	3	Phenylpropanoids and polyketides	Flavonoids	O-methylated flavonoids	373.1279 15963622.5000|343.0809 11665158.1250|315.0857 2050457.1563|153.0182 1562287.2500|181.0130 1261062.6875	1.73179e+06
6.38_563.1767m/z	Oleuropein	C25H32O13	6.38013	563.177	563.173	63.9	pos	M+Na	5.86865	6325757	RFWGABANNQMHMZ-WLFYAOHHSA-N	CC=C1C(C(=COC1OC2C(C(C(C(O2)CO)O)O)O)C(=O)OC)CC(=O)OCCC3=CC(=C(C=C3)O)O	-0.4	Lipids and lipid-like molecules	Prenol lipids	Terpene glycosides	283.0594 22419.9395|297.0768 12593.0361|383.1139 12349.9482|401.1207 11972.4023|209.9193 11886.3242	459485
8.18_253.1081m/z	Alpha-Asarone	C12H16O3	8.17805	253.108	253.108	42.6	neg	M+HCOO	-0.314955	636822	RKFAZBXYICVSKP-AATRIKPKSA-N	CC=CC1=CC(=C(C=C1OC)OC)OC	3	Benzenoids	Phenol ethers	Anisoles	59.0138 4042867.8672|193.0715 1111940.9609|209.1176 685947.2344|161.0455 346718.4902|253.0981 239827.6563	119156
11.07_298.1938n	4-hydroxy-2,5,5,9-tetramethylcycloundeca-2,9-dienyl 4-hydroxybenzoate	C22H30O4	11.072	357.207	357.206	73.79	neg	[M-H]-	1.74074	6368478	JDZBITULCWBIMC-NZNRFOOVSA-N	CC1=CCC(C(=CC(C(CCC1)(C)C)O)C)OC(=O)C2=CC=C(C=C2)O	4.3				357.2070 9199639.6250|297.1858 6652199.6250|282.1621 598325.0586|267.1383 379498.2773|197.0454 272661.9688	717591
7.31_133.0648m/z	Cinnamaldehyde	C9H8O	7.30917	133.065	133.065	58.5	pos	M+H	0.11005	637511	KJPRLNWUNMBNBZ-QPJJXVBHSA-N	C1=CC=C(C=C1)C=CC=O	1.9	Phenylpropanoids and polyketides	Cinnamaldehydes		133.0648 1457345.3594|105.0702 1185806.6250|86.0969 500033.7305|91.0548 240079.9238|79.0549 116673.6953	24286.6
7.26_163.0402m/z	3-coumaric acid	C9H8O3	7.2579	163.04	163.04	70.94	neg	[M-H]-	0.97013	637541	KKSDGJDHHZEWEP-SNAWJCMRSA-N	C1=CC(=CC(=C1)O)C=CC(=O)O	1.8	Phenylpropanoids and polyketides	Cinnamic acids and derivatives	Hydroxycinnamic acids and derivatives	119.0502 1233530.0781|163.0390 512861.1680|59.0138 362187.0762|93.0345 307976.1875|94.0294 236939.0000	165731
6.07_163.0402m/z	p-Coumaric acid	C9H8O3	6.07343	163.04	163.04	88.9	neg	M-H	0.638679	637542	NGSWKAQJJWESNS-ZZXKWVIFSA-N	C1=CC(=CC=C1C=CC(=O)O)O	1.5	Phenylpropanoids and polyketides	Cinnamic acids and derivatives	Hydroxycinnamic acids and derivatives	119.0499 19100138.8125|163.0399 2522954.6523|147.0451 1261753.4688|103.0552 320396.3027|59.0137 277897.7256	7.70201e+06
7.32_147.0804m/z	Methyl trans-styryl ketone	C10H10O	7.31978	147.08	147.08	84.2	pos	[M+H]+	-0.54509	637759	BWHOZHOGCMHOBV-BQYQJAHWSA-N	CC(=O)C=CC1=CC=CC=C1	2.1	Benzenoids	Benzene and substituted derivatives	Styrenes	147.0807 585380.7656|91.0546 502068.9277|119.0855 424650.9512|72.0813 418320.3359|105.0702 373083.4297	18608.9
5.03_225.0760m/z	Sinapic acid	C11H12O5	5.03062	225.076	225.075	79.93	pos	[M+H]+	1.10415	637775	PCMORTLOPMLEFB-ONEGZZNKSA-N	COC1=CC(=CC(=C1O)OC)C=CC(=O)O	1.5	Phenylpropanoids and polyketides	Cinnamic acids and derivatives	Hydroxycinnamic acids and derivatives	180.0663 1532038.8750|207.0681 951756.1250|131.0493 656293.2461|175.0392 491925.2344|224.1309 460621.6875	116779
7.45_285.2213m/z	all trans-Retinal	C20H28O	7.44763	285.221	285.219	93.89	pos	[M+H]+	8.87261	638015	NCYCYZXNIZJOKI-OVSJKPMPSA-N	CC1=C(C(CCC1)(C)C)C=CC(=CC=CC(=CC=O)C)C	6.2	Lipids and lipid-like molecules	Prenol lipids	Retinoids	285.0732 2381543.9375|270.0520 2312730.3125|285.2296 582071.8750|267.1132 243723.4844|81.0704 225884.7480	97516.3
10.59_225.0922m/z	trans-Stilbene	C14H12	10.5899	225.092	225.092	39.8	neg	M+HCOO	0.466614	638088	PJANXHGTPQOBST-VAWYXSNFSA-N	C1=CC=C(C=C1)C=CC2=CC=CC=C2	4.8	Phenylpropanoids and polyketides	Stilbenes		181.1016 936170.4219|225.0904 631387.2031|178.8338 207424.9063|61.9883 165163.0781|59.0137 75472.7656	107382
8.53_195.1029m/z	2-Adamantanone	C10H14O	8.5265	195.103	195.103	64.5	neg	M+HCOO	1.28915	64151	IYKFYARMMIESOX-UHFFFAOYSA-N	C1C2CC3CC1CC(C2)C3=O	1.8	Organic oxygen compounds	Organooxygen compounds	Carbonyl compounds	151.1128 1583764.8594|160.8422 532949.0625|135.0410 145058.8750|195.0616 136615.0313|195.1016 109174.3379	140501
9.27_203.0715m/z	Senkyunolide C	C12H12O3	9.27152	203.072	203.071	67.4	neg	M-H	0.881092	642374	NRENRLOUWSVYIA-WCIBSUBMSA-N	CCCC=C1C2=C(C=CC(=C2)O)C(=O)O1	2.8	Organoheterocyclic compounds	Isocoumarans	Isobenzofuranones	203.0710 3811592.2500|160.0165 1873463.1406|174.0319 608966.0859|173.0242 301698.6563|59.0137 189153.4077	281691
4.77_227.1038m/z	N-Acetylnorloline	C9H14N2O2	4.77263	227.104	227.104	43.1	neg	M+HCOO	0.315522	6430306	BWGXNGORZPWYGZ-KRBWIIOGSA-N	CC(=O)NC1C2CN3C1C(O2)CC3	-0.6	Alkaloids and derivatives	Loline alkaloids and derivatives		183.1140 5465611.7813|227.1026 4985205.5000|126.0434 1145723.1719|97.0410 445671.7500|138.0923 388632.0938	589737
8.44_211.1341m/z	Dihydroactinidiolide	C11H16O2	8.43515	211.134	211.133	50.6	neg	M-H+CH3OH	3.49497	6432173	IMKHDCBNRDRUEB-LLVKDONJSA-N	CC1(CCCC2(C1=CC(=O)O2)C)C	2.2	Organoheterocyclic compounds	Benzofurans		167.1077 1772573.0938|211.1316 1502236.5234|85.0660 549091.8750|211.0935 403650.3164|123.1180 187995.8594	114400
6.07_166.0631n	D-3-Phenyllactic acid	C9H10O3	6.07343	165.056	165.056	47.8	neg	M-H, M-H+CH3CN	0.910141	643327	VOXXWSYKYCBWHO-MRVPVSSYSA-N	C1=CC=C(C=C1)CC(C(=O)O)O	1.1	Phenylpropanoids and polyketides	Phenylpropanoic acids		164.0716 1941619.7861|148.0528 1504830.6211|206.0821 924442.2188|192.0423 700165.6895|147.0459 672087.0938	1.96685e+06
5.47_238.0719m/z	Ferulamide	C10H11NO3	5.46575	238.072	238.072	47.5	neg	M+HCOO	-0.823358	6433734	YYAJJKZSQWOLIP-HWKANZROSA-N	COC1=C(C=CC(=C1)C=CC(=O)N)O	0.9	Phenylpropanoids and polyketides	Cinnamic acids and derivatives	Hydroxycinnamic acids and derivatives	108.0454 2619520.7656|149.0595 940605.8359|179.0311 820721.8125|59.0137 763537.3125|177.0565 727793.5000	78681.9
10.32_305.1761m/z	Falcarindiol	C17H24O2	10.3169	305.176	305.176	54.5	neg	M+HCOO	1.13667	6436239	QWCNQXNAFCBLLV-RCQSYPNMSA-N	CCCCCCCC=CC(C#CC#CC(C=C)O)O	4.4	Lipids and lipid-like molecules	Fatty Acyls	Fatty alcohols	261.1867 180772.3730|304.2004 113038.4844|287.1650 67657.6875|134.0373 34334.6650|178.0282 29107.1758	40283.5
12.13_297.2439m/z	(9Z,12R)-12-Hydroxyoctadec-9-enoic acid	C18H34O3	12.1308	297.243	297.243	75.74	neg	[M-H]-	1.19129	643684	WBHHMMIMDMUBKC-QJWNTBNXSA-N	CCCCCCC(CC=CCCCCCCCC(=O)O)O	5.7	Lipids and lipid-like molecules	Fatty Acyls	Fatty acids and conjugates	297.2435 2232430.6406|279.2307 180388.0681|297.1492 174859.0020|296.2308 162526.0918|183.0121 159355.3005	1.05043e+06
3.57_235.1442m/z	Coumaroyl putrescin	C13H18N2O2	3.57163	235.145	235.145	63.08	pos	[M+H]+	0.400786	6439562	CJHDBEPXEKGBDW-VMPITWQZSA-N	C1=CC(=CC=C1C=CC(=O)NCCCCN)O	1	Phenylpropanoids and polyketides	Cinnamic acids and derivatives	Hydroxycinnamic acids and derivatives	147.0439 5277489.2656|72.0813 1294182.8398|119.0494 1016723.1989|235.1457 858127.9740|89.1077 850247.2448	2.34587e+06
1.90_311.0409m/z	Caftaric acid	C13H12O9	1.90167	311.041	311.041	66.4	neg	M-H	0.0951999	6440397	SWGKAHCIOQPKFW-JTNORFRNSA-N	C1=CC(=C(C=C1C=CC(=O)OC(C(C(=O)O)O)C(=O)O)O)O	0.1	Phenylpropanoids and polyketides	Cinnamic acids and derivatives	Hydroxycinnamic acids and derivatives	59.0138 2505059.0908|149.0092 980303.0156|179.0351 840966.0039|135.0450 731774.5410|137.0243 454422.3965	1.31728e+06
10.79_355.1540m/z	Pseudolaric acid C	C21H26O7	10.7872	355.154	355.154	57	pos	M+H-2H2O	0.124684	6440704	RBXVTEUAOTYIME-GPGKBOPFSA-N	CC(=CC=CC1(C2CCC3(C2(CCC(=CC3)C(=O)OC)O)C(=O)O1)C)C(=O)O	1.8	Lipids and lipid-like molecules	Prenol lipids	Terpene lactones	295.1327 2601320.5313|277.1220 231361.0586|313.1425 224617.1973|267.1405 222864.0195|249.1290 196023.9629	196579
8.20_259.0974m/z	Goniothalamin	C13H12O2	8.20427	259.097	259.098	75.5	neg	M+CH3COO	-0.654973	6440856	RLGHFVLWYYVMQZ-BZYZDCJZSA-N	C1C=CC(=O)OC1C=CC2=CC=CC=C2	2.9	Benzenoids	Benzene and substituted derivatives	Styrenes	215.1078 6218733.8125|259.0975 5430558.3125|199.0760 312357.8438|200.0840 193529.8438|258.1794 124540.1406	565380
5.86_537.1031m/z	Lithospermic acid	C27H22O12	5.85528	537.103	537.104	85.8	neg	M-H	-1.31015	6441498	UJZQBMQZMKFSRV-RGKBJLTCSA-N	C1=CC(=C(C=C1CC(C(=O)O)OC(=O)C=CC2=C3C(C(OC3=C(C=C2)O)C4=CC(=C(C=C4)O)O)C(=O)O)O)O	2.8	Phenylpropanoids and polyketides	2-arylbenzofuran flavonoids		295.0612 15939861.9375|109.0294 11664022.0156|185.0245 11268530.5469|135.0452 2900884.6563|159.0452 2676540.6250	2.18351e+07
5.45_331.0932m/z	Phomopsolide B	C15H20O6	5.45062	331.093	331.096	45.3	neg	M+Cl	-7.30174	6442165	JTHHOHSDOJJNFN-HIWLEQICSA-N	CC=C(C)C(=O)OC1C=CC(=O)OC1C=CC(C(C)O)O	0.8	Organoheterocyclic compounds	Pyrans	Pyranones and derivatives	135.0452 287380.5313|243.1147 199072.4160|287.1042 196678.3730|269.0919 190363.1875|179.0350 171519.5342	66514.5
5.73_511.2033m/z	Ligularine	C23H32NO9+	5.72585	511.203	511.206	51.7	neg	M+HCOO	-5.56376	6442559	UJFFAMMZKASLBJ-IDUWFGFVSA-N	CC=C1C(C(C(C(=O)OCC2=CC[N+]3(C2(C(CC3)OC1=O)O)C)(C)OC(=O)C)C)OC(=O)C	0.4	Alkaloids and derivatives			367.1617 818071.7344|235.1186 404598.2090|59.0138 400243.5938|57.0345 386831.8887|409.1718 309410.5742	263800
7.78_367.2013m/z	Geissoschizine methyl ether	C22H26N2O3	7.77957	367.201	367.202	79.4	pos	M+H	-0.808527	6443046	VAMJZLUOKJRHOW-XEASWFAXSA-N	CC=C1CN2CCC3=C(C2CC1C(=COC)C(=O)OC)NC4=CC=CC=C34	2.7	Alkaloids and derivatives	Corynanthean-type alkaloids		367.2018 86063927.6302|144.0806 36398528.3301|170.0966 9544498.6504|224.1272 5510031.1839|108.0811 4648451.7096	2.68888e+08
6.88_591.1715m/z	Mulberroside A	C26H32O14	6.88028	591.171	591.168	41.5	pos	M+Na	5.35979	6443484	HPSWAEGGWLOOKT-VUNDNAJOSA-N	C1=CC(=C(C=C1OC2C(C(C(C(O2)CO)O)O)O)O)C=CC3=CC(=CC(=C3)OC4C(C(C(C(O4)CO)O)O)O)O	-0.8	Phenylpropanoids and polyketides	Stilbenes	Stilbene glycosides	367.0809 216366.9824|327.0852 69882.1563|313.0709 65506.1289|429.1158 43352.9805|209.9049 34606.5391	5.21641e+06
9.08_219.1743m/z	alpha-Cyperone	C15H22O	9.08433	219.174	219.174	93.7	pos	[M+H]+	-0.00013108	6452086	KUFXJZXMWHNCEH-DOMZBBRYSA-N	CC1=C2CC(CCC2(CCC1=O)C)C(=C)C	3.8	Lipids and lipid-like molecules	Prenol lipids	Sesquiterpenoids	219.1392 816545.4583|173.1324 738541.7051|219.1764 603985.4525|131.0855 465756.0195|145.1011 424355.1764	632296
6.36_347.1507m/z	Tagitinin C	C19H24O6	6.36098	347.151	347.15	65.4	neg	M-H	1.95998	6453884	DUQSSEQKLJQACA-XVBXXOAXSA-N	CC1=CC2C(C(CC(C=CC1=O)(C)O)OC(=O)C(C)C)C(=C)C(=O)O2	2.1	Lipids and lipid-like molecules	Prenol lipids	Terpene lactones	347.1512 6799548.0625|137.0606 867845.1328|165.0556 550496.9824|150.0327 466250.8203|122.0370 453187.3750	563651
1.17_142.0511m/z	5,6-Dihydropyridin-2(1H)-one	C5H7NO	1.17442	142.051	142.051	48	neg	M+HCOO	0.895325	6453994	OXRRHYRRQWIHIV-UHFFFAOYSA-N	C1CNC(=O)C=C1	0.1	Organoheterocyclic compounds	Pyridines and derivatives	Hydropyridines	100.0404 15137847.8203|142.0510 2329157.5625|58.0298 1704228.1445|98.0610 1543311.1133|124.9888 1136048.7188	2.28698e+06
8.46_249.1486m/z	Parthenolide	C15H20O3	8.45683	249.149	249.149	86.6	pos	M+H	0.278087	6473881	KTEXNACQROZXEV-SLXBATTESA-N	CC1=CCCC2(C(O2)C3C(CC1)C(=C)C(=O)O3)C	2.3	Lipids and lipid-like molecules	Prenol lipids	Terpene lactones	249.1508 1443587.5729|231.1381 679371.2702|81.0704 386871.3776|79.0548 326500.4297|105.0701 313905.9121	4.77996e+06
5.28_515.1195m/z	1,3-Dicaffeoylquinic acid	C25H24O12	5.27833	515.119	515.119	89.7	neg	M-H	-0.0569739	6474640	YDDUMTOHNYZQPO-PSEXTPKNSA-N	C1C(C(C(CC1(C(=O)O)OC(=O)C=CC2=CC(=C(C=C2)O)O)OC(=O)C=CC3=CC(=C(C=C3)O)O)O)O	1.5	Organic oxygen compounds	Organooxygen compounds	Alcohols and polyols	191.0560 615904.9414|179.0349 447992.9336|135.0450 440570.3828|353.0883 372758.2109|161.0249 72115.8828	2.36649e+06
4.45_451.1253m/z	Oxyresveratrol 3'-O-beta-D-glucopyranoside	C20H22O9	4.44663	451.125	451.125	78.2	neg	M+HCOO	1.72159	6475174	GGQVPULXXVQLRT-CUYWLFDKSA-N	C1=CC(=C(C=C1O)O)C=CC2=CC(=CC(=C2)OC3C(C(C(C(O3)CO)O)O)O)O	0.7	Phenylpropanoids and polyketides	Stilbenes	Stilbene glycosides	331.0826 668866.9063|289.0716 222938.9922|61.9883 121319.7891|109.0295 120603.2988|123.0448 118654.0049	428090
4.60_204.1020m/z	Methsuximide	C12H13NO2	4.60108	204.102	204.102	74.86	pos	[M+H]+	-2.83333	6476	AJXPJJZHWIXJCJ-UHFFFAOYSA-N		1.2	Organoheterocyclic compounds	Pyrrolidines	Phenylpyrrolidines	131.0491 6006317.6875|188.0711 4690467.0000|146.0599 3693885.5000|147.0440 2700425.9531|204.1014 2419187.4063	162558
9.87_439.3574m/z	Ursolic acid	C30H48O3	9.87095	439.357	439.357	46.6	pos	M+H-H2O	0.698884	64945	WCGUUGGRBIKTOS-GPOJBZKASA-N	CC1CCC2(CCC3(C(=CCC4C3(CCC5C4(CCC(C5(C)C)O)C)C)C2C1C)C)C(=O)O	7.3	Lipids and lipid-like molecules	Prenol lipids	Triterpenoids	203.1795 488825.1953|191.1793 342671.3691|95.0859 239130.3550|189.1636 228657.7344|119.0856 200944.0977	438140
1.37_283.0684m/z	Xanthosine	C10H12N4O6	1.3682	283.068	283.068	72.46	neg	[M-H]-	0.107413	64959	UBORTCNDUKBEOP-UUOKFMHZSA-N	C1=NC2=C(N1C3C(C(C(O3)CO)O)O)NC(=O)NC2=O	-2.4	Nucleosides, nucleotides, and analogues	Purine nucleosides		150.0421 24379184.0000|151.0241 7974628.4688|282.0839 6977748.5000|133.0155 6691239.2500|108.0203 3403296.5156	483651
10.12_372.1807m/z	Arctigenin	C21H24O6	10.1166	372.181	372.181	72.8	pos	M+NH4-H2O	-1.13882	64981	NQWVSMVXKMHKTF-JKSUJKDBSA-N	COC1=C(C=C(C=C1)CC2COC(=O)C2CC3=CC(=C(C=C3)O)OC)OC	3.6	Lignans, neolignans and related compounds	Furanoid lignans	Tetrahydrofuran lignans	343.0810 12065948.0000|358.1042 1341267.0000|211.0236 1309911.3750|297.0758 1240041.7500|300.0625 1169380.0000	291120
0.77_383.1198m/z	Quinic acid	C7H12O6	0.768517	383.12	383.12	98.8	neg	2M-H	0.800547	6508	AAWZDTNXLSGCEK-LNVDRNJUSA-N	C1C(C(C(CC1(C(=O)O)O)O)O)O	-2.4	Organic oxygen compounds	Organooxygen compounds	Alcohols and polyols	191.0561 25654190.1250|59.0139 1525473.5000|85.0294 1515802.7500|87.0089 960938.7500|71.0137 774980.5000	4.24082e+06
2.53_225.0881m/z	2',3'-Dideoxythymidine	C10H14N2O4	2.53045	225.088	225.088	54.19	neg	[M-H]-	0.184741	65119	XKKCQTLDIPIRQD-JGVFFNPUSA-N	CC1=CN(C(=O)NC1=O)C2CCC(O2)CO	-1.7	Nucleosides, nucleotides, and analogues	Pyrimidine nucleosides	Pyrimidine 2',3'-dideoxyribonucleosides	225.0872 1106893.9492|181.0984 504821.5352|180.0666 335345.6816|136.0764 294549.1875|165.0669 289694.9385	519367
7.69_360.1456m/z	Cephalotaxine	C18H21NO4	7.69278	360.146	360.145	39.2	neg	M+HCOO	1.17875	65305	YMNCVRSYJBNGLD-KURKYZTESA-N	COC1=CC23CCCN2CCC4=CC5=C(C=C4C3C1O)OCO5	0.2	Alkaloids and derivatives	Cephalotaxus alkaloids		360.1462 1002673.1250|161.0242 476577.8359|244.1338 331811.6875|115.0035 202893.4219|316.1568 193261.8281	91830.1
6.04_269.0819m/z	4,2'-Dihydroxy-4'-methoxychalcone	C16H14O4	6.03877	269.082	269.082	45.6	neg	M-H	-0.113466	6537040	MOESXQFGHNEYAH-RUDMXATFSA-N	COC1=CC(=C(C=C1)C(=O)C=CC2=CC=C(C=C2)O)O	3.7	Phenylpropanoids and polyketides	Linear 1,3-diarylpropanoids	Chalcones and dihydrochalcones	109.0294 3429494.7813|269.0880 1649234.2188|159.0452 883808.1484|166.0094 289835.0879|181.0327 287681.3125	106571
11.76_271.1328m/z	Arteannuin B	C15H20O3	11.7628	271.133	271.13	66	pos	M+Na	9.52121	6543478	QWQSMEDUZQDVLA-KPHNHPKPSA-N	CC1CCC2C(=C)C(=O)OC23C1CCC4(C3O4)C	2.6	Lipids and lipid-like molecules	Prenol lipids	Terpene lactones	253.1223 585495.8008|271.1321 326873.7637|271.0600 104174.0127|192.0939 99848.9365|224.0831 66799.7930	398139
0.89_193.0718m/z	6-methyltetrahydro-2H-pyran-2,4,5-triol	C6H12O4	0.894083	193.072	193.072	66.6	neg	M+HCOO	-0.0120971	6543736	FDWRIIDFYSUTDP-DPYQTVNSSA-N	CC1C(C(CC(O1)O)O)O	-1.1	Organic oxygen compounds	Organooxygen compounds	Carbohydrates and carbohydrate conjugates	192.0592 14960647.0000|85.0293 5069826.9844|161.0453 4218407.7500|87.0086 2777253.3984|59.0137 2389152.6016	2.81149e+06
8.19_340.0955n	Pinocembrin diacetate	C19H16O6	8.19322	339.088	339.087	40.2	neg	M-H, M+CH3COO	2.39568	6546286	YZOMNXCYSIYMOX-INIZCTEOSA-N	CC(=O)OC1=CC2=C(C(=O)CC(O2)C3=CC=CC=C3)C(=C1)OC(=O)C	2.4	Phenylpropanoids and polyketides	Flavonoids	Flavans	339.0897 2043243.8750|265.0504 1232782.4375|280.0745 963380.6250|324.0643 636310.5156|237.0557 566621.8906	219357
6.67_194.0460m/z	N-Acetyl Mesalazine	C9H9NO4	6.67235	194.046	194.045	75.46	neg	[M-H]-	4.64907	65512	GEFDRROBUCULOD-UHFFFAOYSA-N	CC(=O)NC1=CC(=C(C=C1)O)C(=O)O	1.6	Benzenoids	Benzene and substituted derivatives	Benzoic acids and derivatives	134.0373 9774483.1250|178.0273 5374231.7500|193.0487 2592288.9375|163.9991 2137104.3125|149.0588 1835612.2500	51313.1
5.43_172.0981m/z	6-Hydroxytropinone	C8H13NO2	5.42793	172.098	172.097	62.2	neg	M-H+H2O	4.83887	6604326	UOHSTKWPZWFYTF-ARDNSNSESA-N	CN1C2CC(C1CC(=O)C2)O	-0.6	Alkaloids and derivatives	Tropane alkaloids		130.0872 21135197.5625|172.0981 4008347.1250|93.0346 1032557.6289|128.1081 636985.1426|127.0772 201381.4766	900645
4.85_183.0665m/z	o-Veratraldehyde	C9H10O3	4.85163	183.066	183.066	63.1	neg	M-H+H2O	4.6852	66581	JIVGSHFYXPRRSZ-UHFFFAOYSA-N	COC1=CC=CC(=C1OC)C=O	1.1	Benzenoids	Benzene and substituted derivatives	Methoxybenzenes	139.0764 1429758.5781|183.0650 1178634.7734|124.0536 869511.6543|93.0346 421045.3105|109.0659 285694.1387	498243
7.50_311.0562m/z	ANTHRAQUINONE-2-CARBOXYLIC ACID	C15H8O4	7.5024	311.056	311.056	44.9	neg	M+CH3COO	0.727527	67030	ASDLSKCKYGVMAI-UHFFFAOYSA-N	C1=CC=C2C(=C1)C(=O)C3=C(C2=O)C=C(C=C3)C(=O)O	3	Benzenoids	Anthracenes	Anthracenecarboxylic acids and derivatives	311.0555 1843262.3594|133.0295 636512.3516|59.0138 225692.8716|281.0437 223129.5313|253.0498 212441.4551	202091
10.37_239.1652m/z	Kobusone	C14H22O2	10.3713	239.165	239.165	47.6	neg	M-H+H2O	2.33402	6710676	UETZJEZFLKASPR-UZWIWUQPSA-N	CC1(CC2C1CCC3(C(O3)CCC2=O)C)C	2.3	Organic oxygen compounds	Organooxygen compounds	Carbonyl compounds	239.1651 4274653.8828|59.0138 1024682.1772|123.0814 590200.1426|195.1755 424024.5625|179.0578 420244.2939	1.48253e+06
1.05_274.0565m/z	4-Pyridoxic Acid	C8H9NO4	1.04802	274.056	274.057	46.7	neg	M+HCOOH+HCOO	-1.94531	6723	HXACOUQIXZGNBF-UHFFFAOYSA-N	CC1=NC=C(C(=C1O)C(=O)O)CO	0.1	Organoheterocyclic compounds	Pyridines and derivatives	Pyridinecarboxylic acids and derivatives	128.0352 5562484.2500|256.0455 1433444.7578|212.0563 1134730.0469|102.0559 762629.1250|98.0247 658434.0703	392962
7.72_307.0724m/z	3-Hydroxy-N-(3-nitrophenyl)naphthalene-2-carboxamide	C17H12N2O4	7.72188	307.072	307.074	77.64	neg	[M-H]-	-6.75084	67277	YZJSKRBKHCLMQC-UHFFFAOYSA-N	C1=CC=C2C=C(C(=CC2=C1)C(=O)NC3=CC(=CC=C3)[N+](=O)[O-])O	4	Benzenoids	Naphthalenes	Naphthalenecarboxylic acids and derivatives	233.0718 4933779.0625|263.0819 3811180.5625|307.0706 3210274.3125|205.0771 2882968.7188|191.0618 388451.6016	529347
4.97_177.0557m/z	1-Indanone	C9H8O	4.9727	177.056	177.056	44	neg	M+HCOO	0.0409863	6735	QNXSIUBBGPHDDE-UHFFFAOYSA-N	C1CC(=O)C2=CC=CC=C21	1.7	Benzenoids	Indanes	Indanones	177.0555 1925425.5469|133.0658 1455150.2969|134.0345 370180.9688|135.0450 259794.2090|59.0138 256723.8125	170874
8.85_269.0809m/z	3-Hydroxy-3'-methoxyflavone	C16H12O4	8.84918	269.081	269.081	93.89	pos	[M+H]+	0.233927	676296	GYLGASXCHFNKHD-UHFFFAOYSA-N	COC1=CC=CC(=C1)C2=C(C(=O)C3=CC=CC=C3O2)O	3.4	Phenylpropanoids and polyketides	Flavonoids	Flavones	269.0802 3020525.3750|251.1166 259825.2793|254.0567 251423.5469|213.0908 228726.3828|136.0619 219281.7520	214935
6.15_331.1905m/z	Dicyclohexylphthalate	C20H26O4	6.15138	331.19	331.191	92.78	pos	[M+H]+	-1.36209	6778	DWNAQMUDCDVSLT-UHFFFAOYSA-N	C1=CC=C(C=C1)OC(=O)C2=CC=CC=C2C(=O)OC3=CC=CC=C3	4.5	Phenylpropanoids and polyketides	Depsides and depsidones		109.0286 503443.3066|245.1176 467832.2617|285.1842 406205.7813|286.2178 405410.0313|131.0491 391146.9824	250090
9.86_223.0965m/z	Diethylphthalate	C12H14O4	9.85778	223.096	223.096	63.28	pos	[M+H]+	0.0628007	6781	FLKPEMZONWLCSK-UHFFFAOYSA-N	CCOC(=O)C1=CC=CC=C1C(=O)OCC	2.5	Benzenoids	Benzene and substituted derivatives	Benzoic acids and derivatives	149.0233 1907539.9297|93.0703 505680.1523|177.0546 428530.3945|222.1124 332707.6563|91.0547 312654.4082	580237
9.66_255.0661m/z	Pinocembrin	C15H12O4	9.66497	255.066	255.066	56	neg	M-H	-0.711949	68071	URFCJEUYXNAHFI-ZDUSSCGKSA-N	C1C(OC2=CC(=CC(=C2C1=O)O)O)C3=CC=CC=C3	2.7	Phenylpropanoids and polyketides	Flavonoids	Flavans	255.0658 1491087.2813|59.0138 420496.0566|151.0037 158134.3408|211.1711 146251.5811|213.0562 125566.8115	52688.7
4.92_167.0350m/z	Orsellinic acid	C8H8O4	4.91843	167.035	167.035	95.8	neg	M-H	-0.122093	68072	AMKYESDOVDKZKV-UHFFFAOYSA-N	CC1=CC(=CC(=C1C(=O)O)O)O	1.7	Benzenoids	Benzene and substituted derivatives	Benzoic acids and derivatives	123.0472 254787659.3047|167.0352 43581160.0957|79.0554 25832494.3906|121.0294 6942745.6719|152.0114 3404625.4893	1.1417e+08
10.14_373.1282m/z	Tangeretin	C20H20O7	10.1427	373.128	373.128	93.7	pos	M+H	0.0993699	68077	ULSUXBXHSYSGDT-UHFFFAOYSA-N	COC1=CC=C(C=C1)C2=CC(=O)C3=C(O2)C(=C(C(=C3OC)OC)OC)OC	3	Phenylpropanoids and polyketides	Flavonoids	O-methylated flavonoids	373.1274 1744519.8984|343.0809 1669360.7344|358.1043 167995.3447|297.0753 165432.8838|211.0240 154309.1460	3.33626e+06
11.01_365.2705m/z	Hydrourushiol	C21H36O2	11.0149	365.27	365.27	89.8	neg	M+HCOO	2.31536	68118	DQTMTQZSOJMZSF-UHFFFAOYSA-N	CCCCCCCCCCCCCCCC1=C(C(=CC=C1)O)O	9	Benzenoids	Phenols	Benzenediols	347.2594 3319824.5625|365.2708 1727114.2500|88.0395 38447.6641|299.1650 36237.3281|329.2470 36151.0703	291188
9.47_211.0866m/z	Pyocyanin	C13H10N2O	9.47303	211.087	211.088	71.67	pos	[M+H]+	-4.80842	6817	YNCMLFHHXWETLD-UHFFFAOYSA-N	CN1C2=CC=CC=C2N=C3C1=CC=CC3=O	2	Organoheterocyclic compounds	Diazanaphthalenes	Benzodiazines	211.0863 19765297.9844|193.0760 3721634.5273|169.0759 3177583.2861|167.0596 529657.0215|131.0498 360042.4746	1.48253e+06
5.40_135.0452m/z	2,6-Dimethylbenzoquinone	C8H8O2	5.40178	135.045	135.045	66.6	neg	M-H	0.541881	68241	SENUUPBBLQWHMF-UHFFFAOYSA-N	CC1=CC(=O)C=C(C1=O)C	1.2	Organic oxygen compounds	Organooxygen compounds	Carbonyl compounds	135.0452 10761584.7500|93.0346 1237972.0000|134.0375 1095097.1250|108.0215 719175.8125|109.0294 535212.8125	671098
7.86_151.1117m/z	Perillene	C10H14O	7.86482	151.112	151.112	63.9	pos	M+H	0.0388152	68316	XNGKCOFXDHYSGR-UHFFFAOYSA-N	CC(=CCCC1=COC=C1)C	3.2	Organoheterocyclic compounds	Heteroaromatic compounds		151.1116 627077.4922|151.0753 539810.7344|105.0701 469390.2900|93.0703 396881.5801|91.0546 357934.6240	130598
6.98_265.1434m/z	Artemisinin	C15H22O5	6.97765	265.143	265.143	74.3	pos	M+H-H2O	0.0424066	68827	BLUAFEHZUWYNDE-NNWCWBAJSA-N	CC1CCC2C(C(=O)OC3C24C1CCC(O3)(OO4)C)C	2.8	Benzenoids	Benzene and substituted derivatives	Diphenylethers	247.1331 21442033.1250|167.1068 14963533.7500|219.1383 10633949.0625|265.1438 10407863.2500|201.1275 8171218.2188	8.25055e+06
8.97_283.0965m/z	2',5-Dimethoxyflavone	C17H14O4	8.96975	283.096	283.094	92.8	pos	[M+H]+	8.24635	688667	QNKIRTADURZGPG-UHFFFAOYSA-N		3.1				283.0965 11625193.1250|237.0912 4040620.4375|209.0960 1325365.5391|227.0694 1228938.2344|265.0854 974928.5781	1.08412e+06
9.96_295.0976m/z	6-Ethoxy-3(4'-hydroxyphenyl)-4-methylcoumarin	C18H16O4	9.96407	295.098	295.097	94.58	neg	[M-H]-	2.32959	688788	MOBDZHABRVPJCH-UHFFFAOYSA-N	CCOC1=CC2=C(C=C1)OC(=O)C(=C2C)C3=CC=C(C=C3)O	3.4				223.1097 570898.8750|277.1802 516188.9414|223.0715 238682.7051|145.0659 134870.2188|251.0665 125541.6641	73686.5
9.99_374.2343m/z	Napellonine	C22H31NO3	9.99287	374.234	374.233	54.2	neg	M-H+H2O	3.51595	6915738	CBOSLVQFGANWTL-SQQOAYDSSA-N	CCN1CC2(CCC(C34C2CC(C31)C56C4CC(=O)C(C5)C(=C)C6O)O)C	1.1	Lipids and lipid-like molecules	Prenol lipids	Diterpenoids	374.2339 8369562.2500|74.0247 3489430.4375|61.9883 901819.2500|330.2442 841677.3125|331.2516 159347.5781	609643
5.96_689.1598m/z	Neomangiferin	C25H28O16	5.95673	689.16	689.157	49.7	neg	M+CH3COOH+HCOO	4.6942	6918448	VUWOVGXVRYBSGI-IRXABLMPSA-N	C1=C2C(=CC(=C1OC3C(C(C(C(O3)CO)O)O)O)O)OC4=C(C2=O)C(=C(C(=C4)O)C5C(C(C(C(O5)CO)O)O)O)O	-2.2	Organoheterocyclic compounds	Benzopyrans	1-benzopyrans	491.0977 1747781.6563|109.0294 712453.3652|319.0613 526999.1016|295.0611 351156.8633|137.0243 337715.7402	1.48423e+06
0.91_148.0968m/z	4-Hydroxyisoleucine	C6H13NO3	0.909517	148.097	148.097	59.9	pos	M+H	0.0528261	6918732	OSCCDBFHNMXNME-YUPRTTJUSA-N	CC(C(C)O)C(C(=O)O)N	-2.8	Organic acids and derivatives	Carboxylic acids and derivatives	Amino acids, peptides, and analogues	84.0813 5681039.8438|84.0449 5018752.7031|74.0242 3750370.3281|70.0658 2560259.2500|58.0658 1427432.8750	362218
7.33_138.0198m/z	2-nitrophenol	C6H5NO3	7.33157	138.02	138.02	62.53	neg	[M-H]-	0.677888	6947	IQUPABOKLQSFBK-UHFFFAOYSA-N	C1=CC=C(C(=C1)[N+](=O)[O-])O	1.8	Benzenoids	Phenols	Nitrophenols	137.0243 4968807.7813|108.0215 955534.8750|93.0344 840254.1719|136.0175 141835.7188|109.0271 126285.8203	146572
1.08_211.0724m/z	1-Methyl-6-oxo-1,6-dihydropyridine-3-carboxamide	C7H8N2O2	1.08242	211.072	211.072	51.4	neg	M+CH3COO	0.248258	69698	JLQSXXWTCJPCBC-UHFFFAOYSA-N	CN1C=C(C=CC1=O)C(=O)N	-1	Organoheterocyclic compounds	Pyridines and derivatives	Pyridinecarboxylic acids and derivatives	128.0350 7099829.0000|211.0703 551532.6875|137.0242 391095.3164|168.0664 252736.0313|95.0250 249099.0156	260614
12.63_250.1449m/z	2,6-Di-tert-butyl-4-nitrophenol	C14H21NO3	12.6315	250.145	250.145	80.97	neg	[M-H]-	0.235673	69765	FCGKUUOTWLWJHE-UHFFFAOYSA-N		4.7	Benzenoids	Phenols	Nitrophenols	250.1446 1432253.1250|179.0714 33650.9648|249.1472 32791.7148|235.1197 30565.0059|207.0644 19605.0605	25989.2
7.00_385.2121m/z	Rhynchophylline	C22H28N2O4	7.00018	385.212	385.212	93.7	pos	M+H	-0.239376	6977891	DAXYUDFNWXHGBE-WMLLIFGASA-N	CCC1CN2CCC3(C2CC1C(=COC)C(=O)OC)C4=CC=CC=C4NC3=O	2.3	Organoheterocyclic compounds	Indolizidines		385.2122 143715774.3333|160.0757 75048362.1250|110.0966 16383003.4583|132.0806 13673614.8802|269.1652 13310190.1198	8.19367e+07
7.91_159.1028m/z	8-Hydroxyoctanoic acid	C8H16O3	7.91175	159.103	159.103	39.3	neg	M-H	0.812749	69820	KDMSVYIHKLZKET-UHFFFAOYSA-N	C(CCCC(=O)O)CCCO	-0.1	Organic acids and derivatives	Hydroxy acids and derivatives	Medium-chain hydroxy acids and derivatives	159.1026 3295768.0938|113.0971 3065016.7813|61.9883 367890.9375|59.0137 294399.8750|116.9284 213053.1152	332698
4.64_414.1049m/z	Indole-3-carboxylic acid alpha-D-glucopyranosyl ester	C15H17NO7	4.64132	414.105	414.104	67.6	neg	M+HCOOH+HCOO	2.20332	69867	KMAKOBLIOCQGJP-UHFFFAOYSA-N	C1=CC=C2C(=C1)C(=CN2)C(=O)O	2				136.0403 9262356.5000|414.1046 3052769.0938|252.0513 1119190.2500|208.0614 928570.9844|115.0036 848451.5000	805406
7.32_169.1236m/z	piperitone	C10H16O	7.31905	169.124	169.123	48.8	neg	M-H+H2O	4.9761	6987	YSTPAHQEHQSRJD-UHFFFAOYSA-N	CC1=CC(=O)C(CC1)C(C)C	2.2	Lipids and lipid-like molecules	Prenol lipids	Monoterpenoids	169.1232 1809501.3750|101.0608 601401.2871|83.0504 207472.1406|140.0845 173873.7363|141.1286 138794.8516	89766.2
6.22_133.1012m/z	thymol	C10H14O	6.2156	133.101	133.101	54.1	pos	M+H-H2O	0.367518	6989	MGSRCZKZVOBKFT-UHFFFAOYSA-N	CC1=CC(=C(C=C1)C(C)C)O	3.3	Lipids and lipid-like molecules	Prenol lipids	Monoterpenoids	133.1012 6158869.1016|105.0702 2357742.5313|91.0546 1270307.8535|107.0859 533467.6250|79.0548 524861.5596	503549
10.48_161.0597m/z	4-Methoxycinnamic acid	C10H10O3	10.4763	161.06	161.06	74.7	pos	M+H-H2O	-0.0121556	699414	AFDXODALSZRGIH-QPJJXVBHSA-N	COC1=CC=C(C=C1)C=CC(=O)O	1.8	Phenylpropanoids and polyketides	Cinnamic acids and derivatives	Cinnamic acids	161.0601 1118626.6016|133.0649 1108476.7109|105.0702 344181.1445|119.0859 205083.2910|118.0415 167025.5781	22974.3
5.29_159.0664m/z	3-Methyladipic acid	C7H12O4	5.2918	159.066	159.066	74.53	neg	[M-H]-	1.8594	6999745	SYEOWUNSTUDKGM-YFKPBYRVSA-N	CC(CCC(=O)O)CC(=O)O	0.4				97.0659 5491857.2188|159.0663 2687187.9219|115.0763 2376065.4688|95.0503 815393.7227|61.9883 274311.2188	760378
3.36_129.0557m/z	4-methyl-2-oxopentanoic acid	C6H10O3	3.35767	129.056	129.056	76.23	neg	[M-H]-	0.0996226	70	BKAJNAXTPSGJCU-UHFFFAOYSA-N	CC(C)CC(=O)C(=O)O	0.9	Organic acids and derivatives	Keto acids and derivatives	Short-chain keto acids and derivatives	128.0353 1606676.2135|129.0545 409052.3424|85.0297 306720.6745|57.0345 197410.3984|59.0133 148306.8021	4.82037e+06
1.17_188.0930m/z	Stachydrine	C7H13NO2	1.17442	188.093	188.093	74.9	neg	M+HCOO	1.17316	7016563	CMUNUTVVOOHQPW-ZCFIWIBFSA-O	C[N+]1(CCCC1C(=O)O)C	0.4				144.1029 6062491.3086|188.0927 4814093.9375|87.0088 878989.0664|116.0712 667493.0938|71.0138 649623.0625	875997
8.92_206.0943n	2-phenylphenate tetrahydrate	C12H10O	8.91957	171.08	171.08	84.12	pos	[M+H]+	-0.140287	7017	LLEMOWNGBBNAJR-UHFFFAOYSA-N	C1=CC=C(C=C1)C2=CC=CC=C2O	3.1	Benzenoids	Benzene and substituted derivatives	Biphenyls and derivatives	171.0809 2868624.7969|143.0855 1158657.8594|128.0621 1048418.1875|153.0700 752350.6992|84.0449 562849.5000	2.48578e+07
2.86_138.0318n	Penicillic Acid	C8H10O4	2.8618	171.065	171.065	79.28	pos	[M+H]+	0.563398	7025	VOUGEZYPVGAPBB-UHFFFAOYSA-N	CC(=C)C(=O)C(=CC(=O)O)OC	0.9	Organic acids and derivatives	Keto acids and derivatives	Medium-chain keto acids and derivatives	139.0390 7175557.5771|111.0440 3487110.8327|93.0341 1341097.1549|65.0393 951308.8867|171.0609 651720.8040	2.3177e+06
0.77_178.0483n	Delta-Gluconolactone	C6H10O6	0.768517	195.051	195.05	63.1	neg	M-H+H2O, M+CH3COO	2.95434	7027	PHOQVHQSTUBQQK-SQOUGZDYSA-N	C(C1C(C(C(C(=O)O1)O)O)O)O	-2	Organic oxygen compounds	Organooxygen compounds	Carbohydrates and carbohydrate conjugates	87.0088 2858583.1133|237.0614 609627.7500|129.0190 517467.8672|74.0250 339134.7500|116.0353 308835.6563	5.73843e+06
8.19_349.2027m/z	Andropanolide	C20H30O5	8.19322	349.203	349.202	76.6	neg	M-H	1.73327	7067324	BOJKULTULYSRAS-QPSYGYIJSA-N	CC12CCC(C(C1CCC(=C)C2CC=C3C(COC3=O)O)(C)CO)O	2.2	Organoheterocyclic compounds	Lactones	Gamma butyrolactones	349.2042 1726297.6250|305.1735 228537.3359|287.2056 222184.0820|348.1852 84082.5781|161.0245 64765.2505	565597
5.57_611.2619m/z	6alpha-Chloro-5beta-hydroxywithaferin A	C28H39ClO6	5.57343	611.262	611.263	67.5	neg	M+CH3COOH+HCOO	-1.76299	70686220	YCFROFMCBMCGDC-PNJOURQRSA-N	CC1=C(C(=O)OC(C1)C(C)C2CCC3C2(CCC4C3CC(C5(C4(C(=O)C=CC5O)C)O)Cl)C)CO	4.1	Lipids and lipid-like molecules	Steroids and steroid derivatives	Steroid lactones	59.0139 582556.8750|251.1289 467181.5313|431.1921 449919.1055|207.1385 324581.7578|611.2626 270058.0859	1.39314e+06
5.78_295.1189m/z	8alpha-Hydroxyhirsutinolide	C15H20O6	5.77705	295.119	295.119	48.1	neg	M-H	0.476167	70690654	HGVUPZFNJFDVQM-HEQUYQGPSA-N	CC1CC(C2=C(C(=O)OC2=CC3(CCC1(O3)O)C)CO)O	-0.2	Organoheterocyclic compounds	Dihydrofurans	Furanones	173.0454 976426.7520|251.1289 964863.1641|93.0344 936736.6719|295.0753 585608.1250|295.1258 579319.2500	715681
10.61_315.1956m/z	cyclic3-(1,2-ethanediylacetale)-estra-5(10),9(11)-diene-3,17-dione	C20H26O3	10.6146	315.195	315.193	92.71	pos	[M+H]+	7.45608	7076399	XUOQKQRMICQUQC-AOIWGVFYSA-N	CC12CC=C3C(C1CCC2=O)CCC4=C3CCC5(C4)OCCO5	1.8	Lipids and lipid-like molecules	Steroids and steroid derivatives	Oxosteroids	253.1587 350412.3750|106.0865 210369.9316|81.0704 168948.3203|213.0898 157720.7461|95.0861 155740.2129	69799.6
2.25_212.0564m/z	Dopacetamide	C8H9NO3	2.24557	212.056	212.056	45.1	neg	M+HCOO	-0.312332	70795	PFDFJMIGPOJBQV-UHFFFAOYSA-N	C1=CC(=C(C=C1CC(=O)N)O)O	-0.2	Benzenoids	Benzene and substituted derivatives	Phenylacetamides	151.0377 807292.4453|169.0892 622168.0625|137.0244 618687.7500|72.9932 555851.3750|167.0350 520525.0820	65873.6
1.06_246.1449m/z	Leu-Gly-Gly	C10H19N3O4	1.05675	246.145	246.145	58.69	pos	[M+H]+	-2.80527	70910	VWHGTYCRDRBSFI-ZETCQYMHSA-N	CC(C)CC(C(=O)NCC(=O)NCC(=O)O)N	-3				86.0969 29304620.7500|200.1279 9256140.5625|72.0813 7358858.5000|246.1352 6156796.0000|228.1243 3907435.0000	1.39201e+06
12.53_193.0861m/z	6-Methylcoumarin	C10H8O2	12.5337	193.086	193.086	67.1	pos	M+CH3OH+H	0.821566	7092	FXFYOPQLGGEACP-UHFFFAOYSA-N	CC1=CC2=C(C=C1)OC(=O)C=C2	1.8	Phenylpropanoids and polyketides	Coumarins and derivatives		161.0598 1509439.3844|105.0702 1012323.8587|133.0649 963453.3148|192.1081 477678.3831|115.0552 259449.7813	400019
1.06_160.0373n	Oxoadipic acid	C6H8O5	1.05943	159.03	159.03	57.6	neg	M-H, M-H+H2O	0.512927	71	FGSBNBBHOZHUBO-UHFFFAOYSA-N	C(CC(=O)C(=O)O)CC(=O)O	-0.5	Organic acids and derivatives	Keto acids and derivatives	Medium-chain keto acids and derivatives	89.0245 7696062.3359|159.0299 5175854.0273|177.0410 3910604.3594|87.0088 3463064.4375|59.0138 2482345.7036	3.86093e+06
5.24_181.0508m/z	Veratric acid	C9H10O4	5.23895	181.051	181.051	43	neg	M-H	1.14241	7121	DAUAQNGYDSHRET-UHFFFAOYSA-N	COC1=C(C=C(C=C1)C(=O)O)OC	1.6	Benzenoids	Benzene and substituted derivatives	Benzoic acids and derivatives	59.0138 2934702.0078|139.0764 1864900.6250|137.0607 1793192.2500|71.0138 1422395.1055|101.0244 996365.5605	317035
1.62_264.0512m/z	Quinaldic acid	C10H7NO2	1.6239	264.051	264.051	40.5	neg	M+HCOOH+HCOO	-0.969966	7124	LOAUVZALPPNFOQ-UHFFFAOYSA-N	C1=CC=C2C(=C1)C=CC(=N2)C(=O)O	1.6	Organoheterocyclic compounds	Quinolines and derivatives	Quinoline carboxylic acids	220.0615 4427596.1875|176.0717 4309775.0625|264.0504 3115871.0938|69.0346 1483405.1895|107.0375 419364.2813	514174
7.84_177.0922m/z	Methyl eugenol	C11H14O2	7.84075	177.092	177.092	66.6	neg	M-H	0.705168	7127	ZYEMGPIYFIJGTP-UHFFFAOYSA-N	COC1=C(C=C(C=C1)CC=C)OC	2.5	Benzenoids	Benzene and substituted derivatives	Methoxybenzenes	177.0917 3162735.6563|162.0320 466714.1680|93.0344 415660.5977|177.0216 353319.5586|59.0137 315662.6133	127560
5.04_209.0818m/z	(R,E)-Deca-2-ene-4,6-diyne-1,8-diol	C10H12O2	5.03902	209.082	209.082	66.4	neg	M+HCOO	-0.796099	71307307	QFBMIOGKDCDLDH-BREXMAIKSA-N	CCC(C#CC#CC=CCO)O	0.9	Lipids and lipid-like molecules	Fatty Acyls	Fatty alcohols	179.0351 1658876.4844|194.0585 1603208.5469|161.0246 1046751.8672|209.0825 854756.7656|109.0167 710849.2500	111991
4.63_269.1030m/z	4-(3,4-Dimethoxyphenyl)-3-butene-1,2-diol	C12H16O4	4.62785	269.103	269.103	38.8	neg	M+HCOO	-0.454471	71307311	LFOKKKFXPSWWMO-HWKANZROSA-N	COC1=C(C=C(C=C1)C=CC(CO)O)OC	0.6	Benzenoids	Benzene and substituted derivatives	Methoxybenzenes	269.1044 1045633.1484|232.1190 213225.8008|177.0923 211864.5605|151.0764 188906.6621|207.1029 187642.8125	251601
5.73_213.1007n	3,3'-[Iminobis(methylene)]bis-2(3H)furanone	C10H15NO4	5.72585	230.103	230.103	35.2	neg	M-H, M-H+H2O	2.64928	71331516	IEEUZWZOHWPNNG-UHFFFAOYSA-N	C1COC(=O)C1CNCC2CCOC2=O	0.3	Organoheterocyclic compounds	Lactones	Gamma butyrolactones	130.0872 1725033.6797|212.0927 637513.1875|168.1030 310523.8438|98.0247 217541.7188|229.1033 170631.5469	386798
5.64_639.1625m/z	Rhamnetin 3-sophoroside	C28H32O17	5.64093	639.162	639.157	58.2	neg	M-H	9.04425	71341751	CEZKIFXYWPTANH-UHFFFAOYSA-N	COC1=CC(=C2C(=C1)OC(=C(C2=O)OC3C(C(C(C(O3)CO)O)O)OC4C(C(C(C(O4)CO)O)O)O)C5=CC(=C(C=C5)O)O)O	-0.9	Phenylpropanoids and polyketides	Flavonoids	Flavonoid glycosides	313.0351 3443381.0625|270.0165 1044402.1094|639.1594 943641.6563|242.0217 661280.3320|285.0397 448451.0664	507880
4.73_214.0843n	3,4-O-Isopropylidene shikimic acid	C10H14O5	4.7342	213.077	213.077	40	neg	M-H, M-H+H2O	0.684827	71430783	PILATNHSTHZMCA-UHFFFAOYSA-N	CC1(OC2C=C(CC(C2O1)O)C(=O)O)C	-0.2	Organic oxygen compounds	Organooxygen compounds	Ethers	231.0867 573531.0000|187.0979 306521.8438|71.0139 214324.2070|144.0457 130890.5000|123.0816 108939.3184	347563
7.66_448.1981m/z	Oxaline	C24H25N5O4	7.65882	448.197	448.193	69.56	pos	[M+H]+	8.84007	71438427	SOHAVULMGIITDH-UHFFFAOYSA-N	CC(C)(C=C)C12C=C(C(=O)N3C1(NC(=O)C3=CC4=CN=CN4)N(C5=CC=CC=C25)OC)OC	3.4	Organoheterocyclic compounds	Indoles and derivatives	Pyridoindoles	417.1794 1296045.7813|348.1088 821628.1406|261.0771 384559.4648|136.0620 373147.8828|289.0719 299754.3633	293558
10.13_402.2294m/z	Bullatine G	C22H31NO3	10.1274	402.229	402.228	60.4	neg	M+HCOO	2.15816	71456946	CBOSLVQFGANWTL-DVPYZRQCSA-N	CCN1CC2(CCC(C34C2CC(C31)C56C4CC(=O)C(C5)C(=C)C6O)O)C	1.1	Lipids and lipid-like molecules	Prenol lipids	Diterpenoids	402.2282 1449432.7188|358.2387 495338.6563|371.2594 436151.0781|137.0607 365862.6836|287.2018 137749.8574	148780
7.67_347.1854m/z	Rubescensin A	C20H28O6	7.6712	347.185	347.185	63.9	pos	M+H-H2O	0.215028	71462313	SDHTXBWLVGWJFT-BSDWCHIKSA-N	CC1(CCC(C23C1C(C(C45C2CCC(C4O)C(=C)C5=O)(OC3)O)O)O)C	0.1	Lipids and lipid-like molecules	Prenol lipids	Diterpenoids	347.1859 247880.5313|131.0494 164930.8877|181.0853 138032.4307|135.0806 130147.1504|329.1758 121230.4141	197829
5.55_593.1536m/z	Ternatumoside II	C27H30O15	5.54922	593.154	593.151	85.1	neg	M-H	3.98626	71531248	JAQAIBSNJJWIKR-GTGBIAQCSA-N	CC1C(C(C(C(O1)OC2=C(OC3=CC(=CC(=C3C2=O)O)O)C4=CC=C(C=C4)O)O)OC5C(C(C(C(O5)CO)O)O)O)O	-0.4	Phenylpropanoids and polyketides	Flavonoids	Flavonoid glycosides	298.0474 251461.3711|593.1533 144545.7207|93.0342 55001.0391|173.0457 53672.3125|327.0504 53175.5977	538274
7.15_331.1191m/z	(3R)-5,7-Dihydroxy-6-methyl-3-(4'-hydroxybenzyl)chroman-4-one	C17H16O5	7.15365	331.119	331.118	54.3	neg	M-H+CH3OH	3.05034	71585044	BFVOQLBTLZMHPR-LLVKDONJSA-N	CC1=C(C2=C(C=C1O)OCC(C2=O)CC3=CC=C(C=C3)O)O	3.2	Phenylpropanoids and polyketides	Homoisoflavonoids	Homoisoflavans	331.1224 815508.6875|61.9883 420678.9375|330.1406 130449.1641|59.0137 129146.8359|167.0345 111053.0205	67562.8
10.36_247.1339m/z	Rupestonic acid	C15H20O3	10.358	247.134	247.134	68.8	neg	M-H	-0.378184	71761007	ZFHSKBJBODQVBX-UHFFFAOYSA-N	CC1CCC(CC2=C(C(=O)CC12)C)C(=C)C(=O)O	2.4	Lipids and lipid-like molecules	Prenol lipids	Sesquiterpenoids	247.1338 3517581.0000|203.1441 2918478.0313|149.0973 350517.4375|184.0015 142266.0469|201.1278 124929.9609	659976
6.36_635.2973m/z	Chaetoglobosin Fex	C32H38N2O5	6.36098	635.297	635.297	60.5	neg	M+CH3COOH+HCOO	-0.136265	71768077	UFMHUKPYQLJSOB-ILEFKYORSA-N	CC1CC=CC2C(C(=C)C(C3C2(C(=O)CCC(C(=O)C(=C1)C)O)C(=O)NC3CC4=CNC5=CC=CC=C54)C)O	3.4	Organoheterocyclic compounds	Isoindoles and derivatives	Isoindolines	59.0138 843260.6152|635.2991 653065.6406|71.0138 520923.1406|89.0244 344765.6807|101.0244 198895.2993	264240
7.17_211.0249m/z	Piperonylic acid	C8H6O4	7.16862	211.025	211.025	43.2	neg	M+HCOO	0.785293	7196	VDVJGIYXDVPQLP-UHFFFAOYSA-N	C1OC2=C(O1)C=C(C=C2)C(=O)O	0.4	Organoheterocyclic compounds	Benzodioxoles		193.0143 3225284.3438|211.0254 1422066.4219|149.0244 436685.1641|151.0039 328134.5723|167.1078 295810.6855	214035
3.45_154.0266n	Protocatechuic acid	C7H6O4	3.44717	153.019	153.019	88.1	neg	M+Cl, 2M-H, M-H	0.158437	72	YQUVCSBJEUQKSH-UHFFFAOYSA-N	C1=CC(=C(C=C1C(=O)O)O)O	1.1	Benzenoids	Benzene and substituted derivatives	Benzoic acids and derivatives	109.0284 47827577.9645|153.0192 14358987.8720|108.0211 3208325.9633|135.0450 1344613.6412|123.0429 1281583.0294	3.73325e+07
7.03_589.1557m/z	Isorhamnetin 3-glucoside-7-rhamnoside	C28H32O16	7.03272	589.156	589.155	42.8	pos	M+H-2H2O	0.889367	72188972	NEJKEXUJCSYMCC-PXBUXKMDSA-N	CC1C(C(C(C(O1)OC2=CC(=C3C(=C2)OC(=C(C3=O)OC4C(C(C(C(O4)CO)O)O)O)C5=CC(=C(C=C5)O)OC)O)O)O)O	-0.6	Phenylpropanoids and polyketides	Flavonoids	Flavonoid glycosides	353.0654 299617.9961|338.0406 90022.7793|310.0447 53761.3672|209.9070 39461.7656	1.49412e+06
5.58_120.0558m/z	1,2,3-Benzotriazole	C6H5N3	5.57722	120.056	120.055	58.41	pos	[M+H]+	1.20709	7220	QRUDEWIWKLJBPS-UHFFFAOYSA-N	C1=CC2=NNN=C2C=C1	1	Organoheterocyclic compounds	Benzotriazoles		120.0559 3000379.7500|65.0392 420130.0938|91.0547 392637.6875|119.0867 311423.6563|93.0704 310267.0313	30238.9
8.25_303.0863m/z	Hesperetin	C16H14O6	8.24525	303.086	303.086	84.5	pos	M+H	-0.0810152	72281	AIONOLUJZLIMTK-AWEZNQCLSA-N	COC1=C(C=C(C=C1)C2CC(=O)C3=C(C=C(C=C3O2)O)O)O	2.4	Phenylpropanoids and polyketides	Flavonoids	O-methylated flavonoids	153.0182 37728019.4375|303.0861 29122918.5625|177.0546 15703922.7500|145.0285 11128945.2500|117.0337 4837204.4375	1.24859e+07
11.26_265.1231m/z	Magnolol	C18H18O2	11.2601	265.123	265.123	97	neg	M-H	-0.966627	72300	VVOAZFWZEDHOOU-UHFFFAOYSA-N	C=CCC1=CC(=C(C=C1)O)C2=C(C=CC(=C2)CC=C)O	5	Benzenoids	Benzene and substituted derivatives	Biphenyls and derivatives	265.1216 7704854.1250|96.9602 1751193.0625|247.1127 1279247.8750|265.1274 568816.9688|245.0970 406614.5996	883590
10.68_265.1230m/z	Honokiol	C18H18O2	10.6755	265.123	265.123	90.2	neg	M-H	-1.47489	72303	FVYXIJYOAGAUQK-UHFFFAOYSA-N	C=CCC1=CC(=C(C=C1)O)C2=CC(=C(C=C2)O)CC=C	5	Benzenoids	Benzene and substituted derivatives	Biphenyls and derivatives	265.1231 6571830.5000|224.0839 1908342.0781|223.0763 749954.1875|250.0988 388472.4492|249.0928 268866.8750	295700
6.69_267.0659m/z	Isoflavone	C15H10O2	6.68763	267.066	267.066	37.8	neg	M+HCOO	-1.81326	72304	GOMNOOKGLZYEJT-UHFFFAOYSA-N	C1=CC=C(C=C1)C2=COC3=CC=CC=C3C2=O	3.2	Phenylpropanoids and polyketides	Isoflavonoids	Isoflav-2-enes	267.0658 1524744.0625|109.0295 710454.5918|249.1106 363666.4023|59.0139 290868.5083|266.0546 258449.1094	48630.7
1.79_515.1409m/z	Plumieride	C21H26O12	1.79453	515.141	515.141	90.3	neg	M+HCOO	0.554384	72319	AOPMSFXOYJXDNJ-IRFSQMTFSA-N	CC(C1=CC2(C=CC3C2C(OC=C3C(=O)OC)OC4C(C(C(C(O4)CO)O)O)O)OC1=O)O	-1.2	Lipids and lipid-like molecules	Prenol lipids	Terpene glycosides	179.0350 11681860.5820|135.0451 8959047.2051|515.1398 2192203.0898|341.0883 1151313.6592|191.0563 658386.7488	3.59095e+06
6.97_320.0918m/z	Coptisine chloride	C19H14ClNO4	6.96723	320.092	320.092	88.5	pos	M+?	0.512535	72321	LUXPUVKJHVUJAV-UHFFFAOYSA-M	C1C[N+]2=C(C=C3C=CC4=C(C3=C2)OCO4)C5=CC6=C(C=C51)OCO6.[Cl-]		Alkaloids and derivatives	Protoberberine alkaloids and derivatives		320.0918 23255210.7292|292.0970 3723695.5365|318.0772 1493238.6751|262.0867 1350411.7656|277.0739 1182162.5990	1.45303e+07
9.62_403.1386m/z	Nobiletin	C21H22O8	9.62098	403.139	403.139	96	pos	M+H	-0.284709	72344	MRIAQLRQZPPODS-UHFFFAOYSA-N	COC1=C(C=C(C=C1)C2=CC(=O)C3=C(O2)C(=C(C(=C3OC)OC)OC)OC)OC	3	Phenylpropanoids and polyketides	Flavonoids	O-methylated flavonoids	403.1385 16755007.1719|373.0921 13805201.6211|327.0872 1430204.9487|183.0284 1412625.7500|388.1165 1355881.2031	1.3769e+07
6.27_306.1335m/z	Lycorine	C16H17NO4	6.26987	306.133	306.134	61.6	pos	M+H2O+H	-2.29287	72378	XGVJWXAYKUHDOO-DANNLKNASA-N	C1CN2CC3=CC4=C(C=C3C5C2C1=CC(C5O)O)OCO4	0	Alkaloids and derivatives	Amaryllidaceae alkaloids	Lycorine-type amaryllidaceae alkaloids	131.0493 1127684.8281|288.1169 1066112.9922|188.1067 553077.6875|305.1859 465847.3125|216.1025 381818.6152	121110
4.30_364.1327m/z	9-Aminocamptothecin	C20H17N3O4	4.30317	364.133	364.129	79	pos	M+H	9.74877	72402	FUXVKZWTXQUGMW-FQEVSTJZSA-N	CCC1(C2=C(COC1=O)C(=O)N3CC4=CC5=C(C=CC=C5N=C4C3=C2)N)O	0.3	Alkaloids and derivatives	Camptothecins		320.1428 850646.1836|227.0816 416163.6406|261.0692 330968.8203|127.0325 229494.9868|125.0170 228415.0859	908037
5.01_325.0567m/z	trans-Fertaric acid	C14H14O9	5.01453	325.057	325.057	39.4	neg	M-H	0.513708	72551457	XIWXUSFCUBAMFH-WEPHUFDCSA-N	COC1=C(C=CC(=C1)C=CC(=O)OC(C(C(=O)O)O)C(=O)O)O	0.4	Phenylpropanoids and polyketides	Cinnamic acids and derivatives	Hydroxycinnamic acids and derivatives	193.0506 7615881.5833|134.0372 6288940.1875|163.0401 1973643.1016|119.0493 1809393.6621|59.0138 1216561.1953	6.91446e+06
5.57_329.1245m/z	8'-Oxo-6-hydroxydihydrophaseic acid	C15H20O7	5.57343	329.124	329.124	37.7	neg	M-H+H2O	2.7854	72680929	LYUJWBPVDZIFEZ-UHFFFAOYSA-N	CC12CC(CC(C1(C=CC(=CC(=O)O)CO)O)(OC2=O)C)O	-0.7	Lipids and lipid-like molecules	Prenol lipids	Sesquiterpenoids	329.1262 518639.8438|166.0272 355237.7500|130.0874 296055.7500|113.0608 211208.5352|59.0138 166056.9063	70643.8
11.36_269.2111m/z	Aleuritic acid	C16H32O5	11.3639	269.211	269.211	45.6	pos	M+H-2H2O	0.0775937	7269318	MEHUJCGAYMDLEL-GJZGRUSLSA-N	C(CCCC(C(CCCCCCO)O)O)CCCC(=O)O	2.5	Lipids and lipid-like molecules	Fatty Acyls	Fatty acids and conjugates	269.1547 108081.3125|251.2003 102506.7842|223.0747 83769.9609|269.0832 72482.3203|251.0698 71476.6406	81797
6.27_403.1038m/z	3'-Hydroxy-5,7,4',5'-Tetramethoxyflavone	C19H18O7	6.26833	403.104	403.103	49.5	neg	M+HCOO	0.84924	72703223	NHDUUYDKGATOKT-UHFFFAOYSA-N	COC1=CC2=C(C(=C1)OC)C(=O)C=C(O2)C3=CC(=C(C(=C3)OC)OC)O	2.7	Phenylpropanoids and polyketides	Flavonoids	O-methylated flavonoids	148.0530 4476658.4375|403.1039 3752033.3750|136.0166 1235157.9297|151.0401 1203714.5000|163.0763 731532.9004	789252
6.64_322.1075m/z	Berberrubine	C19H15NO4	6.63878	322.108	322.107	81.6	pos	M+H	0.424187	72704	GLYPKDKODVRYGP-UHFFFAOYSA-O	COC1=C(C2=C[N+]3=C(C=C2C=C1)C4=CC5=C(C=C4CC3)OCO5)O	3.3	Alkaloids and derivatives	Protoberberine alkaloids and derivatives		322.1074 11388602.0000|307.0841 6120970.1875|279.0888 2168527.0313|249.0533 921082.2500|295.0601 895335.8750	811019
1.94_466.1731m/z	Seneciphyllinine	C20H25NO6	1.93817	466.173	466.172	40.1	neg	M+HCOOH+HCOO	3.2006	72745469	CTCKXBIRQMSUIU-UHFFFAOYSA-N	CC=C1CC(=C)C(C(=O)OCC2=CCN3C2C(CC3)OC1=O)(C)OC(=O)C	1.3	Alkaloids and derivatives			164.0719 1149132.2969|111.0088 442336.8682|147.0453 373475.8516|137.0244 213066.5820|72.0092 97259.0234	123415
9.63_211.1340m/z	4-Hydroxy-11,12,13-trinor-5-eudesmen-7-one	C12H18O2	9.62537	211.134	211.133	60.5	neg	M-H+H2O	3.22877	72746331	NGTFVDVHOJMAJY-UHFFFAOYSA-N	CC12CCCC(C1=CC(=O)CC2)(C)O	1.2	Organic oxygen compounds	Organooxygen compounds	Carbonyl compounds	211.1335 3384151.9102|167.1437 1249326.0234|165.1283 1143332.1699|95.0501 1037531.7573|151.0614 142059.8750	1.72974e+06
8.92_205.0870m/z	Dihydrosenkyunolide C	C12H14O3	8.92305	205.087	205.087	70.4	neg	M-H	-0.168966	73052271	QWUKGYMMZPJSKL-UHFFFAOYSA-N	CCCCC1C2=C(C=CC(=C2)O)C(=O)O1	2.4	Organoheterocyclic compounds	Benzofurans	Benzofuranones	205.0866 59449475.5000|161.0970 12757671.8750|132.0579 6981528.9375|120.0214 3731021.5156|148.0166 3296055.1563	2.80717e+07
11.88_398.2327m/z	Levistilide A	C24H28O4	11.8787	398.233	398.233	84.7	pos	M+NH4	0.201173	73099887	UBBRXVRQZJSDAK-UHFFFAOYSA-N	CCCC=C1C2=C(C3C(CC2)C4CCC35C(=C4)C(=O)OC5=CCCC)C(=O)O1	4.9	Organoheterocyclic compounds	Dihydrofurans	Furanones	191.1066 4662871.8906|173.0961 439766.2910|145.1012 200493.4590|91.0546 129298.3477|117.0703 120541.6367	2.03023e+06
0.87_417.1249m/z	Lactobionic acid	C12H22O12	0.872067	417.125	417.125	82.7	neg	M+CH3COO	-0.109702	7314	JYTUSYBCFIZPBE-AMTLMPIISA-N	C(C1C(C(C(C(O1)OC(C(CO)O)C(C(C(=O)O)O)O)O)O)O)O	-5	Lipids and lipid-like molecules	Fatty Acyls	Fatty acyl glycosides	75.0086 1840441.4395|61.9882 1163880.5000|341.1083 591069.7734|59.0138 228005.9219|71.0136 133317.0781	149966
8.15_232.1697m/z	COSTUNOLIDE	C15H20O2	8.15293	232.17	232.17	60.5	pos	M+NH4-H2O	-1.86025	73164	HRYLQFBHBWLLLL-UONOGXRCSA-N	CC1=CCCC(=CC2C(CC1)C(=C)C(=O)O2)C	2.1	Lipids and lipid-like molecules	Prenol lipids	Terpene lactones	187.1480 888517.9883|232.1727 531813.1875|145.1012 384848.5938|109.1015 329228.4063|131.0857 305873.1563	94554
4.89_163.0754m/z	Methyl trans-cinnamic acid	C10H10O2	4.88728	163.075	163.075	69.15	pos	[M+H]+	0.449648	731767	RURHILYUWQEGOS-VOTSOKGWSA-N	CC1=CC=C(C=C1)C=CC(=O)O	2.5	Phenylpropanoids and polyketides	Cinnamic acids and derivatives	Cinnamic acids	163.0395 18908109.5104|135.0442 14876094.0313|117.0338 11344601.5117|145.0282 10847189.1536|89.0390 9213597.7591	832733
8.87_255.1600m/z	3-Hydroxy-4,15-dinor-1(5)-xanthen-12,8-olide	C13H20O3	8.86878	255.16	255.16	55.7	neg	M-H+CH3OH	1.60629	73232471	MOXJTUNOIGNZKZ-UHFFFAOYSA-N	C[C@H]1C[C@H]2[C@H](CC=C1CCO)[C@H](C(=O)O2)C	1.7				255.1605 1109649.3281|59.0138 247340.2813|193.1596 232942.4492|191.1436 91827.3730|254.1452 87237.9922	157496
5.56_181.0509m/z	Jacaranone	C9H10O4	5.56108	181.051	181.051	60.9	neg	M-H	1.25763	73307	WJZSKNRPRWCLLK-UHFFFAOYSA-N	COC(=O)CC1(C=CC(=O)C=C1)O	0.2	Organic oxygen compounds	Organooxygen compounds	Alcohols and polyols	59.0137 2187711.6719|71.0137 1727764.8906|101.0244 1275077.0352|166.0272 1224261.1406|136.0486 1181823.7500	377670
5.87_331.0827m/z	Brazilin	C16H14O5	5.86737	331.083	331.082	76.7	neg	M+HCOO	1.28313	73384	UWHUTZOCTZJUKC-JKSUJKDBSA-N	C1C2=CC(=C(C=C2C3C1(COC4=C3C=CC(=C4)O)O)O)O	1.5	Organoheterocyclic compounds	Benzopyrans	1-benzopyrans	287.0931 769128.8984|137.0244 478587.3008|149.0610 381086.7969|269.0818 359887.9102|109.0295 334061.5098	215481
7.29_352.1542m/z	Palmatine chloride	C21H22ClNO4	7.28555	352.154	352.154	90.3	pos	M+?	0.0224785	73442	RLQYRXCUPVKSAW-UHFFFAOYSA-M	COC1=C(C2=C[N+]3=C(C=C2C=C1)C4=CC(=C(C=C4CC3)OC)OC)OC.[Cl-]		Alkaloids and derivatives	Protoberberine alkaloids and derivatives		352.1544 18955072.3929|336.1225 6866627.4464|337.1297 5851373.3181|308.1281 4919596.8482|144.0807 4187059.9621	2.59445e+07
9.88_273.1493m/z	8-Acetoxypentadeca-1,9Z-diene-4,6-diyn-3-ol	C17H22O3	9.87632	273.149	273.15	67.6	neg	M-H	-1.20861	73554064	BSDJVZWJXREWPD-UKTHLTGXSA-N	CCCCCC=CC(C#CC#CC(C=C)O)OC(=O)C	3.9	Lipids and lipid-like molecules	Fatty Acyls	Fatty alcohols	273.1485 5315280.5000|201.0552 341537.1250|258.1245 151549.7520|272.1909 60794.5859|202.0614 59083.8945	184922
10.93_577.2715m/z	Geldanamycin	C29H40N2O9	10.9279	577.271	577.276	49.2	neg	M-H+H2O	-8.22536	73554183	QTQAWLPCGQOSGP-DVKIRIBLSA-N	CC1CC(C(C(C=C(C(C(C=CC=C(C(=O)NC2=CC(=O)C(=C(C1)C2=O)OC)C)OC)OC(=O)N)C)C)O)OC	2	Phenylpropanoids and polyketides	Macrolactams		80.9657 17489.4414|577.2657 7481.0557|224.3333 4654.5068|139.9326 3831.2593|430.1784 2096.4197	1.13347e+06
6.81_566.2118m/z	Petasinoside	C28H37NO9	6.80502	566.212	566.217	94.8	neg	M+Cl	-8.34236	73657310	JGNHECWVLJXCSV-UHFFFAOYSA-N	CC=C(C)C(=O)OC1CN2CCCC2C1COC(=O)C=CC3=CC=C(C=C3)OC4C(C(C(C(O4)C)O)O)O	2.3	Organic oxygen compounds	Organooxygen compounds	Carbohydrates and carbohydrate conjugates	61.9882 111285.0469	962426
5.47_441.1982m/z	Anonamine	C19H28NO7+	5.46575	441.198	441.201	60.5	neg	M+CH3COO	-5.69315	73717575	SFTHPGHXDNRVHD-UHFFFAOYSA-N	CC1CC(=CCO)C(=O)OC2CC[N+]3(C2(C(=CC3)COC(=O)C1(C)O)O)C	-0.9	Alkaloids and derivatives			381.1765 827091.5938|59.0138 354632.2813|249.1344 265292.7129|71.0138 208716.8125|101.0244 201128.6563	222554
0.80_145.0619m/z	DL-Glutamine	C5H10N2O3	0.804117	145.062	145.062	72.1	neg	M-H	0.334986	738	ZDXPYRJPNDTMRX-UHFFFAOYSA-N	C(CC(=O)N)C(C(=O)O)N	-3.1	Organic acids and derivatives	Carboxylic acids and derivatives	Amino acids, peptides, and analogues	102.0560 4339053.5000|128.0352 2214575.2500|127.0510 616102.4375|145.0618 489376.7500|82.0297 304668.4688	83271.1
6.35_583.2263m/z	Ajugamarin chlorohydrin	C29H41ClO10	6.34703	583.226	583.232	56.3	neg	M-H	-9.01868	73813222	CWWDVANTGWQWKM-UHFFFAOYSA-N	CC=C(C)C(=O)OC1CCC(C2(C1C(C(CC2OC(=O)C)C)(C)CC(C3=CC(=O)OC3)O)COC(=O)C)(CCl)O	2.5	Lipids and lipid-like molecules	Prenol lipids	Terpene lactones	131.0706 25862.0195|71.0132 24797.5977|61.9880 18075.5781|439.1770 12797.8408|57.0343 12593.2451	273289
0.77_828.2755n	Tubuloside A	C37H48O21	0.76515	867.239	867.232	68.8	pos	M+Na, M+K	8.04311	73818350	KZLDMAIXPXOZCX-UHFFFAOYSA-N	CC1C(C(C(C(O1)OC2C(C(OC(C2OC(=O)C)OCCC3=CC(=C(C=C3)O)O)COC4C(C(C(C(O4)CO)O)O)O)OC(=O)C=CC5=CC(=C(C=C5)O)O)O)O)O	-1.5	Organic oxygen compounds	Organooxygen compounds	Carbohydrates and carbohydrate conjugates	867.2382 295158.9375|543.1299 75404.8066|212.8509 62511.5078|705.1833 47620.9688|527.1564 45277.2656	1.32278e+06
0.77_129.0432n	L-Pyroglutamic acid	C5H7NO3	0.768517	146.046	146.045	72.6	neg	M-H+H2O, M-H+CH3OH	4.90525	7405	ODHCTXKNWHHXJC-VKHMYHEASA-N	C1CC(=O)NC1C(=O)O	-0.8	Organic acids and derivatives	Carboxylic acids and derivatives	Amino acids, peptides, and analogues	61.9883 2549895.7500|88.0404 1167549.2500|160.0615 1134724.1250|116.0715 1124840.6953|73.0297 345302.0313	910082
6.40_167.0715m/z	1-Phenylethanol	C8H10O	6.39555	167.072	167.071	35.2	neg	M+HCOO	1.22978	7409	WAPNOHKVXSQRPX-UHFFFAOYSA-N	CC(C1=CC=CC=C1)O	1.4	Benzenoids	Benzene and substituted derivatives		123.0812 1698663.7109|152.0115 1423487.0000|123.0454 905814.5156|108.0216 695082.1758|167.0711 657977.9492	135859
4.01_353.0877m/z	Cyclohexanecarboxylic acid	C16H18O9	4.01187	353.088	353.088	77.7	neg	M-H	-0.304968	7413	NZNMSOFKMUBTKW-UHFFFAOYSA-N	C1CCC(CC1)C(=O)O	1.9	Organic acids and derivatives	Carboxylic acids and derivatives	Carboxylic acids	191.0562 36194742.5779|135.0451 20997482.6953|179.0349 20260445.8341|353.0873 9863642.6373|85.0295 1899769.9612	7.49133e+07
8.98_265.1442m/z	2,3-Dihydroxypterodontic acid	C15H22O4	8.97582	265.144	265.145	66.7	neg	M-H	-1.08382	74135954	MNLUMTSGGLOUCH-UHFFFAOYSA-N	CC1C(C(CC2(C1=CC(CC2)C(=C)C(=O)O)C)O)O	1.8				265.1441 1306971.7461|221.1546 856031.1797|203.1443 200542.5273|247.1332 134471.7715|74.9908 90119.0313	1.12865e+06
4.50_183.0301m/z	Methyl gallate	C8H8O5	4.49817	183.03	183.03	61.2	neg	M-H	1.37311	7428	FBSFWRHWHYMIOG-UHFFFAOYSA-N	COC(=O)C1=CC(=C(C(=C1)O)O)O	0.9	Benzenoids	Benzene and substituted derivatives	Benzoic acids and derivatives	168.0064 718909.9883|124.0165 669202.1758|183.0275 398428.6699|59.0138 196482.8418|139.0399 166103.6650	128554
5.73_206.0823m/z	N-Acetyl-L-phenylalanine	C11H13NO3	5.72585	206.082	206.082	42.5	neg	M-H	0.231132	74839	CBQJSKKFNMDLON-JTQLQIEISA-N	CC(=O)NC(CC1=CC=CC=C1)C(=O)O	0.6	Organic acids and derivatives	Carboxylic acids and derivatives	Amino acids, peptides, and analogues	164.0715 6898783.5000|206.0816 3899620.9063|147.0453 2282660.5469|58.0297 1676681.6250|192.0062 1639362.8750	1.23051e+06
1.73_165.0195m/z	Terephthalic acid	C8H6O4	1.73085	165.019	165.019	53.73	neg	[M-H]-	1.20393	7489	KKEYFWRCBNTPAC-UHFFFAOYSA-N	C1=CC(=CC=C1C(=O)O)C(=O)O	2	Benzenoids	Benzene and substituted derivatives	Benzoic acids and derivatives	121.0290 4138868.4688|93.0346 2143383.5000|150.0321 1473678.8984|92.0506 681715.4688|165.0143 646479.8828	365495
7.30_477.1031m/z	Flavone base + 3O, 1MeO, O-HexA	C22H20O12	7.29818	477.102	477.102	80.56	pos	[M+H]+	0.734434	74977725	XCKMDTYMOHXUHG-UHFFFAOYSA-N		1.1	Phenylpropanoids and polyketides	Flavonoids	Flavonoid glycosides	301.0705 2645531.0938|286.0469 1231465.9844|184.0003 158387.1094|131.0495 144849.7520|85.0289 109130.5313	650400
1.99_530.1293m/z	6''-O-Acetylastragalin	C23H22O12	1.99208	530.129	530.13	47.5	neg	M-H+CH3CN	-1.04558	74978029	AKENCGNASJPQNR-UHFFFAOYSA-N	CC(=O)OCC1C(C(C(C(O1)OC2=C(OC3=CC(=CC(=C3C2=O)O)O)C4=CC=C(C=C4)O)O)O)O	0.7				110.0359 751695.2188|78.9592 534559.8125|530.1277 422357.5391|195.0065 383167.7383|125.0358 360159.8594	218596
7.64_585.2743m/z	Irinotecan hydrochloride	C33H39ClN4O6	7.63593	585.274	585.272	90.6	neg	M+?	3.56637	74990	GURKHSYORGJETM-WAQYZQTGSA-N	CCC1=C2CN3C(=CC4=C(C3=O)COC(=O)C4(CC)O)C2=NC5=C1C=C(C=C5)OC(=O)N6CCC(CC6)N7CCCCC7.Cl	3	Alkaloids and derivatives	Camptothecins		177.1007 36472.4570|281.1260 31539.6504|120.0430 25558.7754|541.2749 21483.6367|209.9264 17871.2305	582924
9.79_357.1347m/z	Hainanolidol	C19H20O4	9.79042	357.135	357.134	66.7	neg	M+HCOO	0.954874	75240552	XGXBIRLBBHSIBS-UHFFFAOYSA-N	CC1C(C2C3CC4=C5C3C1(CCC5=CC(=O)C=C4C)C(=O)O2)O	0.4	Hydrocarbon derivatives	Tropones		357.1345 5462303.9375|327.1239 1405594.7344|299.1302 964654.6250|197.0459 417606.1875|135.0450 409056.8125	908998
7.87_555.2475m/z	Neocaesalpin L	C26H36O11	7.86798	555.247	555.244	49.7	neg	M-H+CH3OH	6.29415	75306146	OXWMFXBPLWSUMS-UHFFFAOYSA-N	CC(=O)OC1CCC(C2(C1(C3CC4(C(=CC(=O)O4)C(C3C(C2OC(=O)C)OC(=O)C)(C)O)O)C)O)(C)C	0.2	Organoheterocyclic compounds	Naphthofurans		209.9267 18023.5352|411.2016 11535.8564|241.9758 7305.9663|385.1812 7266.6934|95.2309 6725.9858	297870
1.21_287.0342m/z	5-Chloro-6-methoxymellein	C11H11ClO4	1.21145	287.034	287.033	50.9	neg	M+HCOO	5.87325	75411932	WLUQQWRUOSZKGN-UHFFFAOYSA-N	CC1CC2=C(C(=CC(=C2Cl)OC)O)C(=O)O1	3	Organoheterocyclic compounds	Benzopyrans	2-benzopyrans	269.0231 5202768.3438|287.0315 2657747.5313|108.0454 2432328.7969|179.0462 2183073.1484|100.0039 1707537.1250	2.81341e+06
5.17_435.0941m/z	Salvianolic acid D	C20H18O10	5.17487	435.094	435.093	55.9	neg	M-H+H2O	3.39678	75412558	KFCMFABBVSIHTB-WUTVXBCWSA-N	C1=CC(=C(C=C1CC(C(=O)O)OC(=O)C=CC2=C(C(=C(C=C2)O)O)CC(=O)O)O)O	1.8	Phenylpropanoids and polyketides	Cinnamic acids and derivatives	Hydroxycinnamic acids and derivatives	175.0400 2320820.6406|151.0401 1313893.2734|149.0610 1052355.5313|135.0452 883745.3594|123.0451 692937.7246	1.09388e+06
7.78_311.0560m/z	Scillascillin	C17H12O6	7.7763	311.056	311.056	63	neg	M-H	-0.38928	75492722	SAXOGBBWXWKZKR-KRWDZBQOSA-N	C1C2=CC3=C(C=C2C14COC5=CC(=CC(=C5C4=O)O)O)OCO3	1.6	Phenylpropanoids and polyketides	Isoflavonoids	Isoflavans	161.0606 31714337.5000|119.0500 9554544.5625|311.0530 2913067.3125|118.0423 926645.0625|265.0499 908064.1875	167153
5.42_196.0738n	Orsellinic acid ethyl ester	C10H12O4	5.42278	197.081	197.081	55.1	pos	M+H, M+CH3CN+H	1.09506	75653	UQSRXQMIXSZGLA-UHFFFAOYSA-N	CCOC(=O)C1=C(C=C(C=C1C)O)O	2.3	Benzenoids	Benzene and substituted derivatives	Benzoic acids and derivatives	151.0386 3963453.9688|155.9744 1230204.7266|179.0694 1147037.2031|125.0600 919089.3125|197.0799 788380.6875	532663
8.01_390.1196m/z	Physarorubinic acid A	C18H19NO6	8.01323	390.12	390.119	36.8	neg	M+HCOO	0.352833	76168347	OKSWYDBASPIKBT-UHFFFAOYSA-N	CN1C(C(=O)C(=C(C=CC=CC=CC=CC=CC(=O)O)O)C1=O)CO	2.4	Lipids and lipid-like molecules	Fatty Acyls	Fatty acids and conjugates	61.9883 2896468.7500|327.1239 1895442.0156|78.9592 752007.7969|345.1718 436550.3594|135.0452 354433.2871	258521
3.40_415.1728m/z	Simmondsin	C16H25NO9	3.39872	415.173	415.172	60.5	neg	M-H+CH3CN	3.19568	76308614	KURSRHBVYUACKS-JICLZLQHSA-N	COC1CC(C(=CC#N)C(C1OC)O)OC2C(C(C(C(O2)CO)O)O)O	-3.3	Organic oxygen compounds	Organooxygen compounds	Carbohydrates and carbohydrate conjugates	253.1194 726836.3711|124.0404 353561.1826|94.0299 310588.7510|325.1411 176857.1699|61.9884 85644.1875	113368
10.36_489.3225m/z	Eichlerialactone	C27H42O4	10.358	489.322	489.322	46.6	neg	M+CH3COO	0.895963	76313961	LEKUPXHLKIIVCR-FAKJQIDCSA-N	CC(=C)C1CCC2(C(C1(C)CCC(=O)O)CCC3C2(CCC3C4(CCC(=O)O4)C)C)C	6.9	Lipids and lipid-like molecules	Prenol lipids	Terpene lactones	489.3283 1745703.0625|109.0658 972807.7305|488.3463 664589.8750|445.3341 614062.8281|373.3119 417123.2969	380602
6.30_577.1587m/z	Sphaerobioside	C27H30O14	6.29593	577.159	577.156	86.5	neg	M-H	4.16845	76315025	XIQCIPHUIZGDLB-SEPMLUPWSA-N	CC1C(C(C(C(O1)OCC2C(C(C(C(O2)OC3=CC(=C4C(=C3)OC=C(C4=O)C5=CC=C(C=C5)O)O)O)O)O)O)O)O	-0.8	Phenylpropanoids and polyketides	Isoflavonoids	Isoflavonoid O-glycosides	298.0484 1164825.1563|577.1556 1069866.8281|312.0637 349047.1172|327.0508 293720.3281|338.0421 243222.7598	440115
5.55_399.1307m/z	Tutin	C15H18O6	5.54922	399.131	399.129	70.3	neg	M+CH3COOH+HCOO	3.61565	76330423	CCAZWUJBLXKBAY-JVCZQLQGSA-N	CC(=C)C1C2C(C3(C4(CO4)C5C(C3(C1C(=O)O2)O)O5)C)O	-0.5	Organoheterocyclic compounds	Lactones	Gamma butyrolactones	219.0663 2301543.2031|399.1302 2143756.1250|193.0868 1667350.4375|59.0138 893220.7764|93.0346 419192.9063	492561
7.72_347.1507m/z	Cryptomoscatone D2	C17H20O4	7.72188	347.151	347.15	61.2	neg	M+CH3COO	2.7412	76524569	GOQOIZFMLWZVMB-UHFFFAOYSA-N	C1C=CC(=O)OC1CC(CC(C=CC2=CC=CC=C2)O)O	2.3	Phenylpropanoids and polyketides	Cinnamyl alcohols		161.0607 1709651.2656|311.1282 938337.8750|285.1469 928067.5469|255.1383 716177.3906|119.0499 430017.7969	243663
8.45_335.2230m/z	ent-3-Oxokauran-17-oic acid	C20H30O3	8.44737	335.223	335.222	92.5	neg	M-H+H2O	2.65802	76526078	DFXNQVOKZMHGJK-UHFFFAOYSA-N	CC1(C2CCC34CC(CCC3C2(CCC1=O)C)C(C4)C(=O)O)C	4.4	Lipids and lipid-like molecules	Prenol lipids	Diterpenoids	335.2228 33840495.5000|334.2115 897985.3750|289.2158 397925.7813|317.2153 262420.4375|61.9875 104986.3672	1.46332e+06
0.93_154.9986m/z	2,5-Furandicarboxylic acid	C6H4O5	0.925433	154.999	154.999	39.9	neg	M-H	0.332758	76720	CHTHALBTIRVDBM-UHFFFAOYSA-N	C1=C(OC(=C1)C(=O)O)C(=O)O	0.7	Organoheterocyclic compounds	Furans	Furoic acid and derivatives	111.0084 6562881.8750|83.0139 878145.9492|67.0190 756193.7500|110.0244 538031.8125|154.9992 329466.1250	250272
8.57_373.1301m/z	Decursinol angelate	C19H20O5	8.56648	373.13	373.129	64.5	neg	M+HCOO	2.61919	776123	AGABNGOXUSXQDD-XKGFZTIGSA-N	CC=C(C)C(=O)OC1CC2=C(C=C3C(=C2)C=CC(=O)O3)OC1(C)C	3.7	Phenylpropanoids and polyketides	Coumarins and derivatives	Pyranocoumarins	78.9591 289683.6250|61.9883 246970.4688|79.9574 245125.0000|329.1403 233897.2305|80.9653 109951.3750	131429
8.30_393.1940m/z	Eupalinolide K	C20H26O6	8.29803	393.194	393.191	36.1	neg	M-H+CH3OH	7.3239	77985613	APOGLVUGPAVNAP-UHFFFAOYSA-N	CC1=CCC(C(=CC2C(C(C1)OC(=O)C(=CCO)C)C(=C)C(=O)O2)C)O	1.3	Lipids and lipid-like molecules	Prenol lipids	Terpene lactones	393.1949 1246345.8594|79.9574 871663.3750|61.9883 213842.3750|321.2082 183033.3574|349.2043 182248.7129	251894
11.69_331.1918m/z	6-Hydroxy-5,6-dehydrosugiol	C20H26O3	11.694	331.192	331.191	63.7	neg	M-H+H2O	2.82053	78297419	XLUHSPYVUOVWRM-UHFFFAOYSA-N	CC(C)C1=C(C=C2C(=C1)C(=O)C(=C3C2(CCCC3(C)C)C)O)O	5.3	Lipids and lipid-like molecules	Prenol lipids	Diterpenoids	331.1915 2491749.2188|298.1573 660490.2500|270.1612 135713.1563|313.1782 98884.3516|295.2290 68335.7188	165332
11.83_483.3123m/z	Poricoic acid B	C30H44O5	11.8286	483.312	483.312	92.1	neg	M-H	1.36701	78302688	NXAZWYWJZDFISF-UHFFFAOYSA-N	CC(=CCCC(C1C(CC2(C1(CC=C3C2=CCC(C3(C)CCC(=O)O)C(=C)C)C)C)O)C(=O)O)C	5.9	Lipids and lipid-like molecules	Prenol lipids	Triterpenoids	483.3123 688257.1836|465.3028 96469.2476|421.3068 26000.4385|255.2312 21013.2749|61.9877 16616.4888	499861
10.51_501.3222m/z	3,4-Secocucurbita-4,24-diene-3,26,29-trioic acid	C30H46O6	10.5066	501.322	501.322	54.3	neg	M-H	0.0282527	78384715	MLKGNOBMWJPGDM-UHFFFAOYSA-N	CC(CCC=C(C)C(=O)O)C1CCC2(C1(CCC3(C2CCC(=C(C)C(=O)O)C3CCC(=O)O)C)C)C	6.9	Lipids and lipid-like molecules	Prenol lipids	Triterpenoids	277.2171 871952.3750|501.3218 574632.8750|78.9591 206195.8848|439.3225 121888.3633|224.0692 86682.0156	616461
9.55_372.2186m/z	Ebracteolatanolide A	C20H28O4	9.55048	372.219	372.217	78.8	neg	M-H+CH3CN	3.4977	78384865	LDVDGGIHTUCGMX-UHFFFAOYSA-N	CC1=C2C(C(C3C4(CCCC(C4CCC35C2O5)(C)C)C)O)OC1=O	2.9	Organoheterocyclic compounds	Naphthofurans		372.2182 5314553.4375|328.2281 2025734.0313|271.2064 642029.8984|61.9882 152970.5000|326.2104 47221.0859	479893
6.41_419.2108m/z	Gomisin K1	C23H30O6	6.40897	419.211	419.207	42.6	neg	M-H+H2O	9.50807	78385003	RCPUCQCVTDMJGJ-UHFFFAOYSA-N	CC1CC2=CC(=C(C(=C2C3=C(C(=C(C=C3CC1C)OC)OC)OC)OC)OC)O	4.9	Phenylpropanoids and polyketides	Tannins	Hydrolyzable tannins	419.2130 2613158.0313|96.9601 517507.1250|175.0400 327270.1094|197.0458 132075.6270|135.0452 108404.0693	107556
5.43_195.0664m/z	Methyl 2,4-dihydroxy-3,6-dimethylbenzoate	C10H12O4	5.42793	195.066	195.066	55.98	neg	[M-H]-	0.838491	78435	UUQHKWMIDYRWHH-UHFFFAOYSA-N	CC1=CC(=C(C(=C1C(=O)OC)O)C)O	2.3	Benzenoids	Benzene and substituted derivatives	Benzoic acids and derivatives	150.0321 2251731.2813|165.0555 1668620.6992|66.0348 1227682.7266|136.0164 880182.9453|151.0385 866971.1094	284597
10.47_331.1918m/z	Dehydroandrographolide	C20H28O4	10.4748	331.192	331.191	87.8	neg	M-H	0.825853	78577438	YIIRVUDGRKEWBV-CZUXAOBFSA-N	CC12CCC(C(C1CCC(=C)C2CC=C3C=COC3=O)(C)CO)O	3.4	Organoheterocyclic compounds	Dihydrofurans	Furanones	331.1917 9670765.2344|301.1811 2804309.0000|271.1701 1954749.1016|283.1705 675589.5928|299.1666 199454.9336	1.23828e+06
10.94_215.1655m/z	12-Hydroxydodecanoic acid	C12H24O3	10.9436	215.165	215.165	47.8	neg	M-H	0.884244	79034	ZDHCZVWCTKTBRY-UHFFFAOYSA-N	C(CCCCCC(=O)O)CCCCCO	3.6	Organic acids and derivatives	Hydroxy acids and derivatives	Medium-chain hydroxy acids and derivatives	215.1652 2243992.3750|169.1595 1697528.3516|122.8943 317974.8867|168.8873 220853.6563|59.0136 121731.5313	186528
1.22_99.0088m/z	Succinic anhydride	C4H4O3	1.22062	99.0088	99.0088	47.2	neg	M-H	0.582778	7922	RINCXYDBBGOEEQ-UHFFFAOYSA-N	C1CC(=O)OC1=O	-0.5	Organic acids and derivatives	Carboxylic acids and derivatives	Dicarboxylic acids and derivatives	73.0295 2362858.5000|57.0345 2264391.5000|99.0087 1423489.6094|59.0138 1316911.0000|55.0189 1185334.4375	401145
1.17_254.0667m/z	1,3,7-Trimethyluric acid	C8H9N4O3	1.17442	254.067	254.065	49.5	neg	M+HCOO	5.0014	79437	BYXCFUMGEBZDDI-UHFFFAOYSA-N	CN1C2=C(NC1=O)N(C(=O)N(C2=O)C)C	-0.4	Organoheterocyclic compounds	Imidazopyrimidines	Purines and purine derivatives	59.0137 11068709.8125|254.0673 2827108.5000|193.0716 2599457.0000|180.0662 2345136.7813|161.0460 1061654.1250	199888
1.86_100.1125m/z	Cyclohexylamine	C6H13N	1.86437	100.112	100.112	69.89	pos	[M+H]+	3.61805	7965	PAFZNILMFXTMIY-UHFFFAOYSA-N	C1CCC(CC1)N	1.5	Organic nitrogen compounds	Organonitrogen compounds	Cyclohexylamines	100.0760 61703833.1250|58.0295 3456490.0000|69.0341 2385424.0000|55.0550 1144705.2734|82.0656 644698.1875	15062.3
1.00_96.0448m/z	3-Pyridinol	C5H5NO	0.997317	96.0444	96.0441	71.2	pos	[M+H]+	3.2925	7971	GRFNBEZIAWKNCO-UHFFFAOYSA-N	C1=CC(=CN=C1)O	0.5	Organoheterocyclic compounds	Pyridines and derivatives	Hydroxypyridines	96.0447 156399986.1406|68.0501 6218472.0547|78.0343 1610102.4941|69.0331 573120.9688|57.0706 116291.0469	1.737e+06
7.32_312.1242m/z	2-[4-(Diethylamino)-2-hydroxybenzoyl]benzoic acid	C18H19NO4	7.31905	312.124	312.123	48.22	neg	[M-H]-	2.29216	79878	FQNKTJPBXAZUGC-UHFFFAOYSA-N	CCN(CC)C1=CC(=C(C=C1)C(=O)C2=CC=CC=C2C(=O)O)O	3.8	Benzenoids	Benzene and substituted derivatives	Benzophenones	312.1249 8275077.7500|148.0529 6885928.4375|178.0507 3344066.3594|135.0452 1757140.3750|311.0571 1527989.0625	912692
8.62_237.1131m/z	Carvacryl acetate	C12H16O2	8.62102	237.113	237.113	37.1	neg	M+HCOO	-0.793383	80792	OXZSUQJHKQOGOK-UHFFFAOYSA-N	CC1=C(C=C(C=C1)C(C)C)OC(=O)C	3	Lipids and lipid-like molecules	Prenol lipids	Monoterpenoids	193.1215 1420281.4375|193.0842 1196811.8828|237.0722 377276.8672|108.0216 353261.1875|237.1126 213283.0508	2.5891e+06
1.23_161.0456m/z	Itaconic acid	C5H6O4	1.23107	161.046	161.045	56.8	neg	M-H+CH3OH	4.70818	811	LVHBHZANLOWSRM-UHFFFAOYSA-N	C=C(CC(=O)O)C(=O)O	-0.1	Lipids and lipid-like molecules	Fatty Acyls	Fatty acids and conjugates	59.0138 4004622.8711|87.0089 3603092.7305|71.0139 1963673.0859|73.0296 1949722.6641|161.0463 1938666.0781	2.937e+07
10.85_315.2546m/z	Methyl hexadecanoate	C17H34O2	10.8546	315.255	315.254	39.2	neg	M+HCOO	2.05896	8181	FLIACVVOZYBSBS-UHFFFAOYSA-N	CCCCCCCCCCCCCCCC(=O)OC	7.9	Lipids and lipid-like molecules	Fatty Acyls	Fatty acid esters	315.2531 948939.8750|315.1871 445388.6719|269.1928 111522.3604|314.2427 85676.2969|313.2382 80735.9375	55350
10.06_312.1595m/z	Dehydronuciferin	C19H19NO2	10.0564	312.159	312.16	47.4	pos	M+H2O+H	-1.79283	821347	JBGSWIBJAGBGOP-UHFFFAOYSA-N	CN1CCC2=CC(=C(C3=C2C1=CC4=CC=CC=C43)OC)OC	4.5	Alkaloids and derivatives	Aporphines		294.1500 1961390.0469|275.2005 1620690.8750|95.0857 1030158.6563|81.0705 740660.1875|247.2062 688649.5000	84290
5.16_193.0508m/z	5-Hydroxy-2-methylchromone	C10H8O3	5.1641	193.051	193.05	53.9	neg	M-H+H2O	4.30266	821390	WELXSIFHTDZTJK-UHFFFAOYSA-N	CC1=CC(=O)C2=C(C=CC=C2O1)O	2.1	Organoheterocyclic compounds	Benzopyrans	1-benzopyrans	149.0606 19874415.7813|193.0496 7095203.4063|134.0372 3120091.8203|161.0454 1550247.4414|178.0272 1230034.6367	1.30955e+06
8.97_341.1019m/z	Cnidilin	C17H16O5	8.96975	341.102	341.1	63.9	pos	M+H2O+Na	6.25118	821449	NNDOCYLWULORAM-UHFFFAOYSA-N	CC(=CCOC1=C2C=COC2=C(C3=C1C=CC(=O)O3)OC)C	3.4	Phenylpropanoids and polyketides	Coumarins and derivatives	Furanocoumarins	323.0911 949507.7578|295.0986 309786.7344|235.0737 280539.4961|263.0687 227820.2188|280.0724 160368.0703	172829
4.11_153.0558m/z	3,4-Dihydroxyphenylethanol	C8H10O3	4.10783	153.056	153.056	54.3	neg	M-H	0.837957	82755	JUUBCHWRXWPFFH-UHFFFAOYSA-N	C1=CC(=C(C=C1CCO)O)O	-0.7	Benzenoids	Phenols	Tyrosols and derivatives	109.0294 13997404.3880|135.0452 5421951.9570|153.0196 3953192.0573|153.0544 1224242.4219|108.0216 1120511.5729	507063
5.96_253.0716m/z	6-Methoxymellein	C11H12O4	5.95673	253.072	253.072	56.5	neg	M+HCOO	-0.859969	83412	AIFNAMVERSBWPS-ZCFIWIBFSA-N	CC1CC2=C(C(=CC(=C2)OC)O)C(=O)O1	2.4	Organoheterocyclic compounds	Benzopyrans	2-benzopyrans	109.0294 7958346.1875|253.0708 6330487.1875|59.0138 3729667.1406|209.0821 2842531.4531|137.0243 2372933.1016	878984
3.73_214.0722m/z	DL-Dopa	C9H11NO4	3.72957	214.072	214.071	36.7	neg	M-H+H2O	3.34974	836	WTDRDQBEARUVNC-UHFFFAOYSA-N	C1=CC(=C(C=C1CC(C(=O)O)N)O)O	-2.7	Organic acids and derivatives	Carboxylic acids and derivatives	Amino acids, peptides, and analogues	109.0167 316106.1064|196.0614 191315.1104|59.0138 171498.7813|213.0770 109439.7734|153.0564 98598.2305	17349.2
6.13_135.0451m/z	2'-Hydroxyacetophenone	C8H8O2	6.12703	135.045	135.045	60.4	neg	M-H	-0.516084	8375	JECYUBVRTQDVAT-UHFFFAOYSA-N	CC(=O)C1=CC=CC=C1O	1.9	Organic oxygen compounds	Organooxygen compounds	Carbonyl compounds	135.0451 13109181.4375|92.0266 3657179.0000|93.0345 2313574.1563|108.0215 1615216.8906|120.0215 1405364.3594	594514
6.38_245.1286m/z	o-Dianisidine	C14H16N2O2	6.38013	245.129	245.128	71.42	pos	[M+H]+	0.553969	8411	JRBJSXQPQWSCCF-UHFFFAOYSA-N	COC1=C(C=CC(=C1)C2=CC(=C(C=C2)N)OC)N	2.2	Benzenoids	Benzene and substituted derivatives	Biphenyls and derivatives	120.0809 14882364.0000|245.1284 13660305.8750|70.0657 10558250.9844|98.0604 4909962.4375|154.0737 3870256.5469	1.4809e+06
9.64_201.0559m/z	2-Naphthoxyacetic acid	C12H10O3	9.63928	201.056	201.056	75.46	neg	[M-H]-	-1.55792	8422	RZCJYMOBWVJQGV-UHFFFAOYSA-N	C1=CC=C2C=C(C=CC2=C1)OCC(=O)O	2.5	Benzenoids	Benzene and substituted derivatives	Phenoxyacetic acid derivatives	59.0138 1416822.2871|157.0659 1199558.9297|201.0574 1008785.2656|164.8363 210212.5127|139.1126 93974.0703	35251.6
5.01_459.1143m/z	Asperuloside	C18H22O11	5.01453	459.114	459.114	62.1	neg	M+HCOO	-0.319957	84298	IBIPGYWNOBGEMH-DILZHRMZSA-N	CC(=O)OCC1=CC2C3C1C(OC=C3C(=O)O2)OC4C(C(C(C(O4)CO)O)O)O	-2.4	Organic oxygen compounds	Organooxygen compounds	Carbohydrates and carbohydrate conjugates	152.0115 1519624.7500|459.1274 1121056.5781|108.0217 1063129.3750|315.0721 1044151.1328|165.0557 833847.9180	310139
4.81_165.0194m/z	1,3-Benzenedicarboxylic acid	C8H6O4	4.81453	165.019	165.019	56.64	neg	[M-H]-	0.37594	8496	QQVIHTHCMHWDBS-UHFFFAOYSA-N	C1=CC(=CC(=C1)C(=O)O)C(=O)O	1.7	Benzenoids	Benzene and substituted derivatives	Benzoic acids and derivatives	123.0448 233279018.6667|121.0293 24879140.4167|79.0552 19945089.5200|77.0396 10353336.4284|165.0190 2490732.2943	1.73667e+07
8.66_291.1236m/z	1,2-Epoxy-10(14)-furanogermacren-6-one	C15H18O3	8.66372	291.124	291.124	66	neg	M+HCOO	-0.868376	85145166	DHQZOOQNUWHCML-UHFFFAOYSA-N	CC1CC2C(O2)C(=C)CC3=C(C(=CO3)C)C(=O)C1	2.2	Organic oxygen compounds	Organooxygen compounds	Carbonyl compounds	247.1339 1116752.3301|291.1203 269878.7266|189.0557 160928.4912|177.0926 153886.3699|61.9883 101838.2090	1.71238e+06
6.66_209.0820m/z	Isoeugenol	C10H12O2	6.65888	209.082	209.082	49.3	neg	M+HCOO	0.587069	853433	BJIOGJUNALELMI-ONEGZZNKSA-N	CC=CC1=CC(=C(C=C1)O)OC	2.6	Benzenoids	Phenols	Methoxyphenols	209.0835 926386.2969|136.0486 318918.2969|109.0295 312400.7031|163.0764 215536.1836|191.0711 167488.2158	112963
8.11_319.1919m/z	13-Methyl-8,11,13-podocarpatriene-3,12-diol	C18H26O2	8.11323	319.192	319.191	60.9	neg	M+HCOO	1.67066	85434191	ULORBDMEFAYHRJ-UHFFFAOYSA-N	CC1=CC2=C(C=C1O)C3(CCC(C(C3CC2)(C)C)O)C	4.4	Lipids and lipid-like molecules	Prenol lipids	Diterpenoids	319.1944 1127896.7500|229.1600 266313.8535|275.2047 181649.1563|144.0456 72325.7969|318.1744 61401.3164	72329.5
4.32_145.0508m/z	3-(Hydroxymethyl)-2-penten-5-olide	C6H8O3	4.3213	145.051	145.05	71.3	neg	M-H+H2O	5.84559	85539715	BHALNYVILOSMDQ-UHFFFAOYSA-N	C1COC(=O)C=C1CO	-0.7	Organoheterocyclic compounds	Pyrans	Pyranones and derivatives	101.0608 2024786.4492|145.0505 602899.5020|83.0502 323977.7354|127.0400 119418.4917|85.0295 52154.5918	489917
5.83_249.1132m/z	Dipropyl phthalate	C14H18O4	5.8289	249.113	249.113	55.77	neg	[M-H]-	-0.00163558	8559	MQHNKCZKNAJROC-UHFFFAOYSA-N	CCCOC(=O)C1=CC=CC=C1C(=O)OCCC	4	Benzenoids	Benzene and substituted derivatives	Benzoic acids and derivatives	205.1232 2551129.1563|151.0763 2528572.4219|125.0607 1970735.4766|249.1143 1867139.6250|123.0450 973592.2500	379257
5.93_207.0662m/z	(S,E)-Deca-2,9-diene-4,6-diyne-1,8-diol	C10H10O2	5.931	207.066	207.066	45	neg	M+HCOO	-0.284335	86103184	BAULTANCNGCCJT-UHFFFAOYSA-N	C=CC(C#CC#CC=CCO)O	0.8	Lipids and lipid-like molecules	Fatty Acyls	Fatty alcohols	119.0501 8182196.1875|148.0529 7803161.5625|207.0306 2696034.0000|207.0689 1225989.7188|163.0405 895705.3398	302169
6.74_252.1365n	2,6-Dimethyl-3-O-methyl-	C14H20O4	6.74347	297.135	297.134	44.1	neg	M-H, M+HCOO	1.37593	86131433	QMIYXGPKSPBDTD-UHFFFAOYSA-N	CCC(C)C(=O)C1=C(C(=C(C(=C1OC)C)O)C)O	3.5	Organic oxygen compounds	Organooxygen compounds	Carbonyl compounds	297.1349 1220628.5000|235.1338 348604.2969|253.1457 339097.9453|128.0352 313301.8750|135.0450 172418.7656	289900
6.63_501.1036m/z	2',5,6',7-Tetraacetoxyflavanone	C23H20O10	6.63082	501.104	501.104	50.8	neg	M+HCOO	-0.559168	86333772	QAJSRSKXTOZULY-NRFANRHFSA-N	CC(=O)OC1=C(C(=CC=C1)OC(=O)C)C2CC(=O)C3=C(O2)C=C(C=C3OC(=O)C)OC(=O)C	1.9	Phenylpropanoids and polyketides	Flavonoids	Flavans	134.0372 11723336.3906|193.0505 7758353.7129|235.0609 5853077.2842|192.0425 4679430.8281|207.0661 3964561.1914	3.25485e+07
0.99_237.0616m/z	alpha-Lipoic Acid	C8H14O2S2	0.99485	237.062	237.062	41.7	neg	M-H+CH3OH	-1.55765	864	AGBQKNBQESQNJD-UHFFFAOYSA-N	C1CSSC1CCCCC(=O)O	1.7	Organoheterocyclic compounds	Dithiolanes	Lipoic acids and derivatives	205.0355 685370.1289|125.0244 675646.5625|237.0603 624231.9375|75.0088 464429.7207|129.0193 425100.7168	284424
6.32_181.0507m/z	3,5-Dimethoxy-4-hydroxybenzaldehyde	C9H10O4	6.32447	181.051	181.051	91.6	neg	M-H	0.609568	8655	KCDXJAYRVLXPFO-UHFFFAOYSA-N	COC1=CC(=CC(=C1O)OC)C=O	0	Benzenoids	Phenols	Methoxyphenols	166.0271 7790129.1406|151.0036 5824088.5625|59.0138 1360674.5869|71.0138 1074200.3535|181.0515 998477.3281	948889
11.49_496.3404m/z	LPC 16:0	C24H50NO7P	11.4866	496.34	496.34	81.33	pos	[M+H]+	0.410356	86554	ASWBNKHCZGQVJV-UHFFFAOYSA-N	CCCCCCCCCCCCCCCC(=O)OCC(COP(=O)([O-])OCC[N+](C)(C)C)O	5.6	Lipids and lipid-like molecules	Glycerophospholipids	Glycerophosphocholines	184.0732 1928556.7930|104.1072 1728615.1133|86.0969 868074.0996|496.3405 744940.5469|124.9999 515624.0088	754413
5.78_220.1333m/z	Ritalinic acid	C13H17NO2	5.77878	220.133	220.134	67.57	pos	[M+H]+	-2.55223	86863	INGSNVSERUZOAK-UHFFFAOYSA-N	C1CCNC(C1)C(C2=CC=CC=C2)C(=O)O	-2.4	Organic nitrogen compounds	Organonitrogen compounds	Amines	131.0493 105655878.0000|202.1228 62524758.0000|219.1491 34732700.0000|72.0814 15461345.2500|103.0546 12751518.0000	57595.7
0.93_173.0456m/z	Shikimic acid	C7H10O5	0.925433	173.046	173.045	75.46	neg	[M-H]-	0.546924	8742	JXOHGGNKMLTUBP-HSUXUTPPSA-N	C1C(C(C(C=C1C(=O)O)O)O)O	-1.7	Organic oxygen compounds	Organooxygen compounds	Alcohols and polyols	111.0086 41073652.8203|85.0294 10661276.5020|154.9983 5356594.6719|93.0343 3631289.4453|173.0097 3432292.5156	613612
9.11_247.0964m/z	Isoeugenol acetate	C12H14O3	9.10982	247.096	247.094	71.3	pos	M+H2O+Na	8.9952	876160	IUSBVFZKQJGVEP-SNAWJCMRSA-N	CC=CC1=CC(=C(C=C1)OC(=O)C)OC	2.4	Benzenoids	Phenol esters		229.0850 2047610.2344|187.0391 1605435.3359|247.0922 1114850.9531|143.0492 314731.0000|185.0965 236967.4922	194242
4.97_275.0558m/z	Protocatechualdehyde	C7H6O3	4.9727	275.056	275.056	91.3	neg	2M-H	-1.25877	8768	IBGBGRVKPALMCQ-UHFFFAOYSA-N	C1=CC(=C(C=C1C=O)O)O	1.3	Organic oxygen compounds	Organooxygen compounds	Carbonyl compounds	137.0242 8100565.1250|136.0145 135602.8438|108.0214 107134.7344|109.0288 68285.1318|203.0822 67220.7266	329210
1.06_89.0245m/z	Pyruvic aldehyde	C3H4O2	1.05943	89.0245	89.0237	35.5	neg	M-H+H2O	8.70463	880	AIJULSRZWUXGPQ-UHFFFAOYSA-N	CC(=O)C=O	-0.4	Organic oxygen compounds	Organooxygen compounds	Carbonyl compounds	89.0245 2823885.2885|59.0139 397053.1533|71.0138 115432.1967|87.0083 59285.3703|50.0034 34491.2604	3.05336e+07
11.01_205.1600m/z	4-(1,1,3,3-Tetramethylbutyl)phenol	C14H22O	11.0149	205.16	205.159	75.87	neg	[M-H]-	4.02614	8814	ISAVYTVYFVQUDY-UHFFFAOYSA-N	CC(C)(C)CC(C)(C)C1=CC=C(C=C1)O	5	Benzenoids	Benzene and substituted derivatives	Phenylpropanes	161.0970 1078766.9766|205.1591 672975.3828|205.0890 335582.3516|203.1437 226622.8262|83.0500 72791.8594	16593.9
7.22_277.1071m/z	Dihydromethysticin	C15H16O5	7.21715	277.107	277.107	39.5	pos	M+H	0.30073	88308	RSIWXFIBHXYNFM-NSHDSACASA-N	COC1=CC(=O)OC(C1)CCC2=CC3=C(C=C2)OCO3	2.6	Phenylpropanoids and polyketides	Kavalactones		277.1075 1649488.7188|131.0493 931853.4922|245.0811 853318.4844|188.1074 820438.7500|72.0813 690882.8750	224556
1.73_461.1305m/z	Gentiopicrin	C16H20O9	1.73085	461.131	461.13	83.7	neg	M+CH3COOH+HCOO	1.3299	88708	DUAGQYUORDTXOR-GPQRQXLASA-N	C=CC1C(OC=C2C1=CCOC2=O)OC3C(C(C(C(O3)CO)O)O)O	-1.2	Organic oxygen compounds	Organooxygen compounds	Carbohydrates and carbohydrate conjugates	122.0373 2295492.2969|461.1295 1248352.3906|71.0139 632805.6719|417.1408 539354.4414|101.0244 347206.1143	3.13268e+06
7.44_272.0925m/z	3-Oxo-4-benzyl-3,4-dihydro-1H-pyrrolo [2,1-c] oxazine-6-methylal	C15H13NO3	7.43567	272.092	272.092	41.3	neg	M-H+H2O	0.948192	88847447	UMCJKAAHDXLKRZ-UHFFFAOYSA-N	C1C2=CC=C(N2C(C(=O)O1)CC3=CC=CC=C3)C=O	2.1	Organic acids and derivatives	Carboxylic acids and derivatives	Amino acids, peptides, and analogues	124.0402 38697811.3750|94.0297 15145324.3125|66.0348 2307394.7500|272.0930 2184631.5000|106.0296 1100557.7500	1.86353e+06
4.75_376.1374n	Loganic acid	C16H24O10	4.74668	375.13	375.13	78.8	neg	M+Cl, 2M-H, M-H	1.29985	89640	JNNGEAWILNVFFD-CDJYTOATSA-N	CC1C(CC2C1C(OC=C2C(=O)O)OC3C(C(C(C(O3)CO)O)O)O)O	-1.7	Lipids and lipid-like molecules	Prenol lipids	Terpene glycosides	213.0770 24787972.8750|375.1301 22407379.5000|69.0346 14760995.1563|59.0138 13564735.0000|113.0243 9112062.2813	6.21368e+06
7.47_355.2014m/z	Yohimbine	C21H26N2O3	7.46848	355.202	355.202	82.06	pos	[M+H]+	-2.23256	8969	BLGXFZZNTVWLAY-SCYLSFHTSA-N	COC(=O)C1C(CCC2C1CC3C4=C(CCN3C2)C5=CC=CC=C5N4)O	2.9	Organoheterocyclic compounds	Naphthofurans		355.2017 37405644.2500|144.0807 17910986.2578|131.0492 4563227.7852|170.0965 4055866.9766|212.1282 3765954.1133	1.22382e+07
1.03_302.0883m/z	2-Fluoroadenosine	C10H12FN5O4	1.03375	302.088	302.09	41.4	neg	M-H+H2O	-6.25046	8975	HBUBKKRHXORPQB-UUOKFMHZSA-N	C1=NC2=C(N=C(N=C2N1C3C(C(C(O3)CO)O)O)F)N	-0.6	Nucleosides, nucleotides, and analogues	Purine nucleosides		128.0351 17509155.3750|87.0088 627341.4375|110.0247 503547.1992|128.0649 467077.6875|175.0245 192518.6250	553081
6.90_345.0972m/z	Oxypeucedanin hydrate	C16H16O6	6.90403	345.097	345.095	46.1	pos	M+H2O+Na	7.11628	899657	PEWFWDOPJISUOK-ZDUSSCGKSA-N	CC(C)(C(COC1=C2C=CC(=O)OC2=CC3=C1C=CO3)O)O	1.6	Phenylpropanoids and polyketides	Coumarins and derivatives	Furanocoumarins	345.0964 4446100.3750|327.0972 2955943.1875|330.0732 2491752.5625|309.0866 1902706.2188|136.0617 1649402.8125	1.87155e+06
1.19_331.0675m/z	norbergenin	C13H14O9	1.19215	331.068	331.066	59.6	neg	M-H+H2O	3.24863	90476206	GDYGAIKPBLFCKR-OIPGZRGRSA-N	C1=C2C(=C(C(=C1O)O)O)C3C(C(C(C(O3)CO)O)O)OC2=O	-1.3	Benzenoids	Benzene and substituted derivatives	Benzoic acids and derivatives	331.0662 2741335.0938|151.0036 1204893.9766|125.0242 1181037.8984|169.0140 982962.8633|78.9589 268296.2988	2.3598e+06
4.50_439.1617m/z	Eurycomanone	C20H24O9	4.49817	439.162	439.16	56.2	neg	M-H+CH3OH	3.12333	90476663	RRXCMOJNEHOTBC-MHDOEDTOSA-N	CC1=CC(=O)C(C2(C1CC3C45C2C(C(C(=C)C4(C(C(=O)O3)O)O)O)(OC5)O)C)O.O.O	-2.8	Lipids and lipid-like molecules	Prenol lipids	Terpene lactones	195.0662 1024673.5703|165.0550 672498.5586|150.0321 554119.5352|165.0189 281209.1563|180.0427 273560.3906	83786
5.10_289.0716m/z	Cianidanol	C15H14O6	5.10448	289.072	289.072	96	neg	M-H	-0.709402	9064	PFTAWBLQPZVEMU-DZGCQCFKSA-N	C1C(C(OC2=CC(=CC(=C21)O)O)C3=CC(=C(C=C3)O)O)O	0.4	Phenylpropanoids and polyketides	Flavonoids	Flavans	289.0711 19874149.6328|109.0293 5269567.1895|245.0814 4743043.9922|123.0451 3863730.9395|125.0244 3682997.6355	4.73878e+06
6.21_717.1533m/z	Quercetin-3-gentiobioside	C27H30O17	6.20665	717.153	717.152	62.6	neg	M+HCOOH+HCOO	2.1486	90657242	FDRQPMVGJOQVTL-BVYPKUFKSA-N	C1=CC(=C(C=C1C2=C(C(=O)C3=C(C=C(C=C3O2)O)O)OC4C(C(C(C(O4)COC5C(C(C(C(O5)CO)O)O)O)O)O)O)O)O	-1.8	Phenylpropanoids and polyketides	Flavonoids	Flavonoid glycosides	321.0402 19244248.5000|519.0919 8562468.8750|185.0244 4832902.3281|109.0294 4734949.4531|295.0609 4711533.8438	5.31678e+07
7.89_387.1439m/z	Sanggenone H	C20H18O6	7.88823	387.144	387.144	55.6	pos	M+CH3OH+H	0.283465	90681446	QPAKXSCQEJXHSW-INIZCTEOSA-N	CC1(C=CC2=C(C=CC(=C2O1)C3CC(=O)C4=C(C=C(C=C4O3)O)O)O)C	3.3	Phenylpropanoids and polyketides	Flavonoids	Flavans	137.0597 2347340.8047|313.0707 1943585.7500|387.1174 1092987.3750|369.0956 722567.2031|191.0701 656206.9648	323279
5.51_199.0868m/z	4-Nitrosodiphenylamine	C12H10N2O	5.51105	199.087	199.086	72.09	pos	[M+H]+	1.06015	9074	OIJHFHYPXWSVPF-UHFFFAOYSA-N	C1=CC=C(C=C1)NC2=CC=C(C=C2)N=O	2.5	Benzenoids	Benzene and substituted derivatives	Aniline and substituted anilines	181.0762 2445423.1094|199.0855 1213430.8594|72.0813 1165647.2988|131.0492 634660.7813|154.0634 632079.3516	115608
8.54_301.1072m/z	Farrerol	C17H16O5	8.53858	301.107	301.107	73	pos	M+H	0.347913	91144	DYHOLQACRGJEHX-UHFFFAOYSA-N	CC1=C(C(=C2C(=C1O)C(=O)CC(O2)C3=CC=C(C=C3)O)C)O	3.1	Phenylpropanoids and polyketides	Flavonoids	Flavans	301.0663 2743491.1875|286.0472 1655707.2500|191.1071 589546.0156|258.0520 569964.3828|223.0749 431284.5508	186235
5.53_269.1029m/z	Senkyunolide I	C12H16O4	5.52637	269.103	269.103	56.4	neg	M+HCOO	-0.707137	91232697	DQNGMIQSXNGHOA-GZMMTYOYSA-N	CCCC=C1C2=C(C(C(CC2)O)O)C(=O)O1	0.5	Organoheterocyclic compounds	Isobenzofurans		269.1031 1156841.1719|181.1231 332759.2344|59.0138 305885.4395|207.1031 231538.3867|225.1142 190973.7324	109848
3.53_405.1410m/z	Aucubin	C15H22O9	3.52755	405.141	405.14	58.9	neg	M+CH3COO	2.31387	91458	RJWJHRPNHPHBRN-FKVJWERZSA-N	C1=COC(C2C1C(C=C2CO)O)OC3C(C(C(C(O3)CO)O)O)O	-3	Lipids and lipid-like molecules	Prenol lipids	Terpene glycosides	59.0137 791524.5449|61.9883 192258.0859|183.0661 156012.3003|168.0425 33041.1123|153.0179 28672.3809	590396
4.01_351.0727m/z	4-Methylumbelliferyl glucuronide	C16H16O9	4.01187	351.072	351.071	77.72	neg	[M-H]-	2.54276	91553	ARQXEQLMMNGFDU-JHZZJYKESA-N	CC1=CC(=O)OC2=C1C=CC(=C2)OC3C(C(C(C(O3)C(=O)O)O)O)O	-0.5	Phenylpropanoids and polyketides	Coumarins and derivatives	Coumarin glycosides	133.0294 2704122.4086|177.0194 1168397.1520|105.0344 375292.3963|173.0452 333630.0531|77.0397 143334.5145	3.39331e+06
10.59_259.1339m/z	Dihydropyrocurzerenone	C15H18O	10.5899	259.134	259.134	48	neg	M+HCOO	-0.501479	91734838	GWQCNWWIXOLIAV-SECBINFHSA-N	CC1CCC2=C(C1)C3=C(C=C2C)OC=C3C	4.7	Lipids and lipid-like molecules	Prenol lipids	Sesquiterpenoids	215.1449 409844.5664|172.0893 182264.2363|259.1397 170951.1543|148.0166 132127.5391|221.8420 84511.2129	55348.6
10.13_521.3123m/z	Stachysterone D	C27H42O6	10.1274	521.312	521.312	58.3	neg	M+CH3COO	0.871705	91745162	JWXMXJQGIRXWDG-MRHAYEGBSA-N	CC1(CCC(O1)C(C)(C2CCC3(C2(CCC4C3=CC(=O)C5C4(CC(C(C5)O)O)C)C)O)O)C	1.5	Lipids and lipid-like molecules	Steroids and steroid derivatives	Cholestane steroids	521.3123 690720.0781|162.0686 467233.6797|343.2130 275727.1660|150.0686 209458.4028|177.0921 202635.2510	827965
9.88_381.2651m/z	6alpha-Hydroxynidorellol	C20H34O3	9.87632	381.265	381.264	63.2	neg	M+CH3COO	1.65709	91884829	JEZOMVOAWYLQAJ-SKDBMBEJSA-N	CC(=CCC1C2(CCCC(C2C(C(C1(C)O)O)O)(C)C)C)C=C	4.5	Lipids and lipid-like molecules	Prenol lipids	Diterpenoids	295.1912 743776.4063|277.1805 526012.1328|345.2440 346199.3262|199.1341 260034.9312|181.1233 146348.5615	1.82122e+06
5.47_381.1920m/z	ent-14,15-Dinor-13-oxolabda-8(17),11-dien-18-oic acid	C18H26O3	5.46575	381.192	381.192	69.5	neg	M+HCOOH+HCOO	0.572899	91885074	BQLIBSZGTNAGNT-ZRDMDAGASA-N	CC(=O)C=CC1C(=C)CCC2C1(CCCC2(C)C(=O)O)C	3.5	Lipids and lipid-like molecules	Prenol lipids	Sesquiterpenoids	381.1902 5835503.5000|337.2022 1847331.6875|249.1338 885881.7188|59.0138 624514.6875|71.0138 489778.5625	377511
8.20_257.1758m/z	Euscaphin B	C14H26O4	8.20427	257.176	257.176	36.2	neg	M-H	-0.120894	91885086	UIQSLOCCENWDIG-UYJPZPQLSA-N	CC(C=CC1(C(CC(CC1(C)O)O)(C)C)OC)O	0.6	Lipids and lipid-like molecules	Prenol lipids	Sesquiterpenoids	257.1767 1201092.7813|211.1703 175364.8125|59.0138 94653.6973|256.2375 64130.3555|96.9600 59516.3047	58533.5
6.54_287.1500m/z	6,9,10-Trihydroxy-7-megastigmen-3-one	C13H22O4	6.54288	287.15	287.15	51.4	neg	M+HCOO	0.0128474	91885191	NPIIJTPCHBVBJO-GKKQKQIKSA-N	CC1CC(=O)CC(C1(C=CC(CO)O)O)(C)C	-0.2	Lipids and lipid-like molecules	Prenol lipids	Sesquiterpenoids	287.1502 1460107.2031|59.0139 869514.7598|227.1290 576973.8477|96.9601 557993.5625|269.1387 181406.3594	130806
8.94_535.1964m/z	9-O-Feruloyllariciresinol	C30H32O9	8.93557	535.196	535.197	41.6	neg	M-H	-1.69905	91885203	NNFCVTSCCNBWCZ-QPDANWEPSA-N	COC1=C(C=CC(=C1)CC2COC(C2COC(=O)C=CC3=CC(=C(C=C3)O)OC)C4=CC(=C(C=C4)O)OC)O	4.7	Lignans, neolignans and related compounds	Furanoid lignans	Tetrahydrofuran lignans	134.0372 794072.0938|535.1903 486530.1250|160.0167 376387.4375|193.0506 325211.8633|175.0401 252020.2598	143762
8.68_293.1756m/z	1,3,5-Cadinatriene-3,8-diol	C15H22O2	8.67582	293.176	293.176	60.5	neg	M+CH3COO	-0.630738	91885240	RKVZRTDMSVXBGL-ZWZTZDBGSA-N	CC1CC(C(C2=C1C=C(C(=C2)C)O)C(C)C)O	3.4	Lipids and lipid-like molecules	Prenol lipids	Sesquiterpenoids	293.1759 3212944.0313|275.1651 689274.5156|248.1371 584926.0000|249.1427 318620.9688|249.1010 228675.8906	168073
5.01_743.2469m/z	Isomartynoside	C31H40O15	5.01453	743.247	743.239	67.2	neg	M+HCOOH+HCOO	9.92683	91895373	NFTBVWKAIZBSRS-ZXLVUZSHSA-N	CC1C(C(C(C(O1)OC2C(C(OC(C2O)OCCC3=CC(=C(C=C3)OC)O)COC(=O)C=CC4=CC(=C(C=C4)O)OC)O)O)O)O	0.1	Phenylpropanoids and polyketides	Cinnamic acids and derivatives	Hydroxycinnamic acids and derivatives	239.0559 5871301.0000|179.0349 1630493.3281|177.0556 973165.3008|149.0608 854139.3281|107.0502 577677.3789	649718
8.65_287.2226m/z	Reneilmol	C15H28O3	8.652	287.223	287.222	47.6	neg	M-H+CH3OH	1.48586	91895383	XUVQJFBJHKRROA-ZYIYBEKCSA-N	CC(C)C1CCC2(C1C(C(CCC2O)(C)O)O)C	2.2	Lipids and lipid-like molecules	Prenol lipids	Sesquiterpenoids	287.2213 19260139.0000|269.2114 457544.8750|141.1277 263479.4375|285.2028 220218.7344|99.0798 198617.0625	889304
8.38_363.2180m/z	Tenacigenin B	C21H32O5	8.37737	363.218	363.218	50.2	neg	M-H	0.727371	91895409	FWXVLSDGEDMLQU-NKKJJTMBSA-N	CC(=O)C1CCC23C1(C(C(C4C2(O3)CCC5C4(CCC(C5)O)C)O)O)C	0.9				363.2175 18614731.7500|301.1805 399231.5391|61.9883 338102.7188|327.2186 133259.3906|319.1917 122096.8281	987545
10.93_503.3379m/z	14,17-Epidioxy-28-nor-15-taraxerene-2,3-diol	C29H46O4	10.9279	503.338	503.338	71.2	neg	M+HCOO	0.176878	91895420	FMQSPIDOGLAJKQ-BLZAXGAYSA-N	CC1(CCC23C=CC4(C5(CCC6C(C(C(CC6(C5CCC4(C2C1)C)C)O)O)(C)C)C)OO3)C	6	Lipids and lipid-like molecules	Prenol lipids	Sesterterpenoids	503.3377 1126304.5938|279.2328 807165.9375|457.3321 97327.0703|78.9591 65297.1777|61.9885 41836.0000	440041
9.69_501.3224m/z	3-Dehydro-15-deoxoeucosterol	C29H44O4	9.69413	501.322	501.322	74.3	neg	M+HCOO	0.553292	91895430	KHSHJGYTLGFEMC-LBQQCSDXSA-N	CCC(=O)C1CC(C2(O1)CCC3(C2(CCC4=C3CCC5C4(CCC(=O)C5(C)CO)C)C)C)C	4.7	Lipids and lipid-like molecules	Prenol lipids	Triterpenoids	501.3245 882346.1719|134.0373 130285.0703|471.3120 89115.3604|453.2997 81512.8477|193.0504 81097.9063	911933
2.40_482.1431n	4-Hydroxy-2-methoxyphenol 1-O-(6-O-syringoyl)glucoside	C22H26O12	2.40212	513.162	513.161	56.6	neg	M-H+CH3OH, M+HCOO	1.41087	92024106	ZPJXHZWSVVTKED-UHFFFAOYSA-N	COC1=CC(=CC(=C1O)OC)C(=O)OCC2C(C(C(C(O2)OC3=C(C=C(C=C3)O)OC)O)O)O	0.6	Phenylpropanoids and polyketides	Tannins	Hydrolyzable tannins	197.0456 1138634.7266|72.9931 501506.0938|135.0452 441273.0195|179.0346 357823.5781|123.0450 311381.0508	1.36178e+06
5.06_357.1195m/z	Piceoside	C14H18O7	5.06368	357.119	357.119	47.3	neg	M+CH3COO	1.39453	92123	GOZCEKPKECLKNO-RKQHYHRCSA-N	CC(=O)C1=CC=C(C=C1)OC2C(C(C(C(O2)CO)O)O)O	-0.7	Organic oxygen compounds	Organooxygen compounds	Carbohydrates and carbohydrate conjugates	195.0661 1755823.1094|136.0527 321409.9629|59.0137 281756.6748|109.0291 174800.0313|173.0456 174447.4707	87696.5
0.89_103.0401m/z	(R)-3-Hydroxybutanoic acid	C4H8O3	0.894083	103.04	103.04	39.7	neg	M-H	0.530418	92135	WHBMMWSBFZVSSR-GSVOUGTGSA-N	CC(CC(=O)O)O	-0.5	Organic acids and derivatives	Hydroxy acids and derivatives	Beta hydroxy acids and derivatives	59.0137 21795732.5625|103.0030 1688047.8750|59.0041 710432.6250|68.6598 205378.2813	31494.5
9.14_409.1302m/z	Amorphigenin	C23H22O7	9.13633	409.129	409.128	78.25	neg	[M-H]-	2.30668	92207	ZJMLELXRQUXRIU-HBGVWJBISA-N	COC1=C(C=C2C(=C1)C3C(CO2)OC4=C(C3=O)C=CC5=C4CC(O5)C(=C)CO)OC	2.8	Phenylpropanoids and polyketides	Isoflavonoids	Rotenoids	409.1262 1346509.1250|322.0852 896022.8906|365.1409 581352.1250|293.0428 358263.7500|294.0499 344592.6328	263523
5.48_292.0826m/z	7-Amino-4-methylcoumarin	C12H11NO4	5.4779	292.083	292.083	56	neg	M+CH3COO	0.0451641	92249	GLNDAGDHSLMOKX-UHFFFAOYSA-N	CC1=CC(=O)OC2=C1C=CC(=C2)N	1.6	Phenylpropanoids and polyketides	Coumarins and derivatives		246.0773 611811.9609|96.9602 375601.1875|82.0299 375260.6104|119.0502 373761.5625|274.0717 360535.9453	247156
8.55_221.0819m/z	Mono-iso-butyl phthalate	C12H14O4	8.55317	221.082	221.082	80.89	neg	[M-H]-	-0.196047	92272	RZJSUWQGFCHNFS-UHFFFAOYSA-N	CC(C)COC(=O)C1=CC=CC=C1C(=O)O	2.5	Benzenoids	Benzene and substituted derivatives	Benzoic acids and derivatives	177.0920 4807785.9375|221.0815 2999446.3750|148.0529 2707835.0625|59.0137 1844799.4072|134.0373 1088698.1016	4.22982e+06
9.56_293.0819m/z	3-Hydroxymethylenetanshinquinone	C18H14O4	9.56167	293.082	293.082	60.7	neg	M-H	-0.246284	92288941	RUJKJFRMCYQMLH-CYBMUJFWSA-N	CC1=COC2=C1C(=O)C(=O)C3=C2C=CC4=C3CCC(C4=C)O	2	Lipids and lipid-like molecules	Prenol lipids	Diterpenoids	293.0848 1954911.9063|187.0763 832988.3047|265.0871 779421.3516|250.0629 542325.8125|93.0344 232469.8438	186139
7.78_167.0946n	N-(2,4-dimethylphenyl)formamide	C9H11NO	7.77957	150.091	150.091	77.88	pos	[M+H]+	-0.130571	92363	JOFDPSBOUCXJCC-UHFFFAOYSA-N		1.5				150.0914 1307864.7500|149.0231 1223639.7813|132.0807 1083070.3945|131.0492 574164.6563|93.0703 540934.4805	69023.8
0.75_333.0592m/z	Orotidine	C10H12N2O8	0.750783	333.059	333.057	51.6	neg	M+HCOO	5.83145	92751	FKCRAVPPBFWEJD-XVFCMESISA-N	C1=C(N(C(=O)NC1=O)C2C(C(C(O2)CO)O)O)C(=O)O	-2.6	Nucleosides, nucleotides, and analogues	Pyrimidine nucleosides		333.0584 2868229.5625|152.9957 1802239.8945|78.9589 1714792.3750|241.0112 911980.1875|96.9708 384880.0313	266930
10.51_250.1933n	Clareolide	C16H26O2	10.5069	251.201	251.201	45.8	pos	M+H-H2O, M+H	-0.0988414	929262	IMKJGXCIJJXALX-SHUKQUCYSA-N	CC1(CCCC2(C1CCC3(C2CC(=O)O3)C)C)C	4.3	Organoheterocyclic compounds	Naphthofurans		81.0704 1239352.6846|79.0548 555482.0483|251.2007 258499.0459|170.0555 255328.8477|95.0859 230934.9219	694337
4.49_166.1228m/z	Ephedrine	C10H15NO	4.48602	166.123	166.123	77.22	pos	[M+H]+	0.775818	9294	KWGRBVOPPLSCSI-WPRPVWTQSA-N	CC(C(C1=CC=CC=C1)O)NC	0.9	Benzenoids	Benzene and substituted derivatives	Phenylpropanes	148.1121 6008900.9375|120.0810 2274495.1165|117.0702 865681.1341|123.0442 850272.1777|133.0885 727785.8411	1.0636e+06
1.47_123.0555m/z	Nicotinamide	C6H6N2O	1.46848	123.055	123.055	80.8	pos	M+H	1.52907	936	DFPAKSUCGFBDDF-UHFFFAOYSA-N	C1=CC(=CN=C1)C(=O)N	-0.4	Organoheterocyclic compounds	Pyridines and derivatives	Pyridinecarboxylic acids and derivatives	123.0555 89072676.0000|80.0501 19718420.7188|78.0343 4551806.0000|96.0447 2630326.1250|106.0293 2358401.1875	7.49953e+06
1.08_122.0248m/z	NICOTINIC ACID	C6H5NO2	1.08242	122.025	122.025	75.4	neg	M-H	0.0341928	938	PVNIIMVLHYAWGP-UHFFFAOYSA-N	C1=CC(=CN=C1)C(=O)O	0.4	Organoheterocyclic compounds	Pyridines and derivatives	Pyridinecarboxylic acids and derivatives	78.0347 6029792.2031|122.0244 1647807.9199|121.0293 454224.7734|94.0296 331730.2119|95.0137 227771.2891	1.48688e+06
8.92_303.1954m/z	4-Androsten-11beta-ol-3,17-dione	C19H26O3	8.91957	303.195	303.196	97.15	pos	[M+H]+	-0.0858643	94141	WSCUHXPGYUMQEX-KCZNZURUSA-N	CC12CCC(=O)C=C1CCC3C2C(CC4(C3CCC4=O)C)O	1.6	Lipids and lipid-like molecules	Steroids and steroid derivatives	Androstane steroids	173.1324 2442630.8594|257.1898 1535837.2500|285.1826 810819.9609|145.1012 796533.2344|131.0854 709374.8008	286001
0.76_193.0354m/z	Glucuronic acid	C6H10O7	0.7599	193.035	193.035	54.19	neg	[M-H]-	0.799716	94715	AEMOLEFTQBMNLQ-AQKNRBDQSA-N	C1(C(C(OC(C1O)O)C(=O)O)O)O	-2.3	Organic oxygen compounds	Organooxygen compounds	Carbohydrates and carbohydrate conjugates	112.0119 38410075.5313|192.0592 36744089.2500|87.0086 25684843.4219|85.0293 22401682.5938|111.0087 15619073.7500	685316
9.88_335.2230m/z	5,6-DiHETE	C20H32O4	9.87632	335.223	335.222	78.93	neg	[M-H]1-	2.56133	95065861	VPXVODYVPILPRC-CLQAUIESSA-N	CCC=CCC=CCC=CCC=CCC(C(CCCC(=O)O)O)O	3.8	Lipids and lipid-like molecules	Fatty Acyls	Eicosanoids	335.2226 1964421.2474|334.2099 207855.2734|85.0659 126847.2793|61.9886 65480.4912|308.0332 43504.8802	930741
6.06_535.1455m/z	10-O-Coumaroyl-10-O-deacetylasperuloside	C25H26O12	6.06303	535.145	535.145	80.4	neg	M-H+H2O	0.626325	95224286	JXFDBOBLMXBLDZ-ULUBWVSDSA-N	C1=CC(=CC=C1C=CC(=O)OCC2=CC3C4C2C(OC=C4C(=O)O3)OC5C(C(C(C(O5)CO)O)O)O)O	-0.7	Phenylpropanoids and polyketides	Cinnamic acids and derivatives	Hydroxycinnamic acids and derivatives	135.0450 26043617.7500|373.0933 4591891.1250|179.0348 2513360.0156|134.0374 1594946.1250|107.0503 395056.3438	1.54973e+06
6.87_551.1183m/z	Monomethyl lithospermate	C28H24O12	6.86788	551.118	551.119	58.9	neg	M-H	-2.15915	95224420	NFOCYHUCMXEHDG-PDLQCWERSA-N	COC(=O)C1C(OC2=C(C=CC(=C12)C=CC(=O)OC(CC3=CC(=C(C=C3)O)O)C(=O)O)O)C4=CC(=C(C=C4)O)O	3.1	Phenylpropanoids and polyketides	2-arylbenzofuran flavonoids		135.0450 2140650.2031|309.0768 2028525.2031|197.0454 1231670.6602|179.0350 667585.1973|72.9931 650742.6563	5.21822e+06
1.26_153.0324m/z	2-Hydroxy-2-methylbutanoic acid	C5H10O3	1.25593	153.032	153.032	36.7	neg	M+Cl	-0.162366	95433	MBIQENSCDNJOIY-UHFFFAOYSA-N	CCC(C)(C(=O)O)O	0.3	Lipids and lipid-like molecules	Fatty Acyls	Fatty acids and conjugates	78.9591 12936817.5000|125.0009 8579937.5938|110.0246 3814742.6875|153.0327 2246139.2500|109.0291 652773.2813	556142
13.57_473.3280m/z	Ercalcitriol	C28H44O3	13.5695	473.328	473.327	54.4	neg	M+HCOO	1.84971	9547243	ZGLHBRQAEXKACO-XJRQOBMKSA-N	CC(C=CC(C)C(C)(C)O)C1CCC2C1(CCCC2=CC=C3CC(CC(C3=C)O)O)C	4.9	Lipids and lipid-like molecules	Steroids and steroid derivatives	Vitamin D and derivatives	473.3272 1315331.0000|109.0658 867236.6680|429.3380 551296.2969|357.3163 460353.4141|385.3475 185955.0273	243887
8.06_359.1125m/z	Gardenin B	C19H18O7	8.05838	359.113	359.113	58.7	pos	M+H	-0.0518857	96539	LXEVSYZNYDZSOB-UHFFFAOYSA-N	COC1=CC=C(C=C1)C2=CC(=O)C3=C(C(=C(C(=C3O2)OC)OC)OC)O	3.3	Phenylpropanoids and polyketides	Flavonoids	O-methylated flavonoids	359.1120 4343185.4375|343.0810 1103046.2500|344.0881 869258.6563|298.0863 741919.1875|326.0785 603010.9297	398671
2.33_237.1235m/z	Ala-Phe	C12H16N2O3	2.33192	237.123	237.123	91.2	pos	[M+H]+	0.555437	96814	OMNVYXHOSHNURL-WPRPVWTQSA-N	CC(C(=O)NC(CC1=CC=CC=C1)C(=O)O)N	-2.5	Organic acids and derivatives	Carboxylic acids and derivatives	Amino acids, peptides, and analogues	120.0810 3907173.1354|192.1021 737888.4792|146.0986 484598.6139|70.0658 295573.7660|237.1243 255244.4063	1.07733e+06
1.89_149.0093m/z	Oxaloacetic acid	C4H4O5	1.8905	149.009	149.008	37.4	neg	M-H+H2O	5.25608	970	KHPXUQMNIQBQEV-UHFFFAOYSA-N	C(C(=O)C(=O)O)C(=O)O	-0.6	Organic acids and derivatives	Keto acids and derivatives	Short-chain keto acids and derivatives	149.0072 480877.6563|87.0088 479498.6836|72.9931 334436.6826|59.0138 277222.6250|133.0157 196448.2080	105292
9.24_345.0969m/z	Eupatorin	C18H16O7	9.24045	345.097	345.097	90.7	pos	M+H	0.157332	97214	KLAOKWJLUQKWIF-UHFFFAOYSA-N	COC1=C(C=C(C=C1)C2=CC(=O)C3=C(C(=C(C=C3O2)OC)OC)O)O	2.9	Phenylpropanoids and polyketides	Flavonoids	O-methylated flavonoids	345.0966 6829703.9375|312.0632 2003425.0625|284.0680 1818582.6250|330.0732 1367234.7031|269.0438 461132.3516	691590
9.74_352.1178m/z	Oxoglaucine	C20H17NO5	9.7401	352.118	352.118	51.3	pos	M+H	-0.28758	97662	ZYKCETVKVRJFGD-UHFFFAOYSA-N	COC1=C(C2=C3C(=C1)C=CN=C3C(=O)C4=CC(=C(C=C42)OC)OC)OC	3.5	Alkaloids and derivatives	Aporphines		352.1163 1415433.3750|322.0696 1414153.8281|337.0916 725152.6250|294.0699 337935.0625|336.1255 268131.9375	288895
5.01_353.0879m/z	Cryptochlorogenic acid	C16H18O9	5.01453	353.088	353.088	94.5	neg	M-H	0.291411	9798666	GYFFKZTYYAFCTR-AVXJPILUSA-N	C1C(C(C(CC1(C(=O)O)O)O)OC(=O)C=CC2=CC(=C(C=C2)O)O)O	-0.4	Organic oxygen compounds	Organooxygen compounds	Alcohols and polyols	191.0560 15105106.4688|173.0453 12638451.4095|179.0350 8839196.6875|135.0451 8482956.6895|353.0880 2771779.3542	5.11432e+07
5.09_367.1041m/z	5-O-Feruloylquinic acid	C17H20O9	5.09425	367.104	367.103	69.6	neg	M-H	1.85143	9799386	RAGZUCNPTLULOL-KJJWLSQTSA-N	COC1=C(C=CC(=C1)C=CC(=O)OC2CC(CC(C2O)O)(C(=O)O)O)O	-0.1	Organic oxygen compounds	Organooxygen compounds	Alcohols and polyols	193.0504 26586763.0000|134.0372 20301874.7500|367.1031 3156339.9688|117.0343 1821137.6250|173.0451 1317347.6250	2.48586e+06
6.11_509.2385m/z	copyranosyl ester	C26H38O10	6.1112	509.239	509.239	55.9	neg	M-H	-1.31771	98049796	NRUSGLWZCNYPPQ-OGJNIKTMSA-N	CC1(CCCC2(C1C(CC34C2(CCC(C3)C(=C)C4=O)O)O)C)C(=O)OC5C(C(C(C(O5)CO)O)O)O	-0.2	Lipids and lipid-like molecules	Prenol lipids	Terpene glycosides	59.0138 679613.8716|71.0139 344386.7041|329.1760 282016.8555|89.0245 259904.4243|275.1649 174957.8340	147649
5.90_461.2031m/z	(6R,9R)-3-Oxo-alpha-ionol glucoside	C19H30O7	5.90352	461.203	461.203	35.7	neg	M+HCOOH+HCOO	0.73227	9820702	SZOPSAFLRCYJCX-ITEOXOHJSA-N	CC1=CC(=O)CC(C1C=CC(C)OC2C(C(C(C(O2)CO)O)O)O)(C)C	0	Lipids and lipid-like molecules	Fatty Acyls	Fatty acyl glycosides	167.0350 1570629.9453|287.1497 1024556.4297|59.0138 720148.0000|461.2021 464342.8672|227.1289 457549.2695	309785
4.58_328.1520m/z	Stepharine	C18H19NO3	4.58375	328.152	328.155	36.9	neg	M-H+CH3OH	-9.88824	98455	OGJKMZVUJJYWKO-UHFFFAOYSA-N	COC1=C(C2=C3C(CC24C=CC(=O)C=C4)NCCC3=C1)OC	2.1	Alkaloids and derivatives	Proaporphines		328.1537 771786.5625|298.1402 382222.2188|223.1077 285479.1172|74.0246 266744.1875|59.0137 245148.8750	193627
6.76_388.1753m/z	Allocryptopine	C21H23NO5	6.75785	388.175	388.176	54.7	pos	M+H2O+H	-2.00768	98570	HYBRYAPKQCZIAE-UHFFFAOYSA-N	CN1CCC2=CC3=C(C=C2C(=O)CC4=C(C1)C(=C(C=C4)OC)OC)OCO3	2.9	Alkaloids and derivatives	Protopine alkaloids		388.1722 853920.8750|120.0810 572829.5586|387.2197 403466.2188|370.1643 379100.1563|131.0494 331421.0547	168886
6.06_568.2636m/z	Paraherquamide E	C28H35N3O4	6.06303	568.264	568.267	42.7	neg	M+HCOOH+HCOO	-5.94139	9898611	XNXXZRQPTAQILV-PYGUQFFJSA-N	CC1CCN2C13CC4C(C5(CC4(C2)N(C3=O)C)C6=C(C7=C(C=C6)OC(C=CO7)(C)C)NC5=O)(C)C	2.9	Organoheterocyclic compounds	Azaspirodecane derivatives		61.9883 2586131.9688|135.0454 74214.0313|61.9984 63300.5469|59.0140 48621.7148|191.0538 38103.4414	414039
8.58_213.1497m/z	(+)-ISOPINOCAMPHEOL	C10H18O	8.58037	213.15	213.15	73.5	neg	M+CH3COO	1.09413	99038	REPVLJRCJUVQFA-UHFFFAOYSA-N	CC1C2CC(C2(C)C)CC1O	2.6	Lipids and lipid-like molecules	Prenol lipids	Monoterpenoids	213.1500 15422464.2500|183.1391 3470398.7500|195.1391 3024392.6563|169.1233 489555.5391|198.0699 148946.0781	965682
9.57_403.2166m/z	Strophanthidin (Corchorin)	C23H32O6	9.57435	403.217	403.213	61.6	neg	M-H	9.78153	9909188	ODJLBQGVINUMMR-WOCZMEKDSA-N	CC12CCC3C(C1(CCC2C4=CC(=O)OC4)O)CCC5(C3(CCC(C5)O)C=O)O	0.6	Lipids and lipid-like molecules	Steroids and steroid derivatives	Steroid lactones	403.2166 1454757.5313|96.9601 230533.1992|61.9883 113047.2617|59.0139 38060.4365|79.9575 26732.7930	599302
7.03_263.1278m/z	Austricine	C15H18O4	7.03272	263.128	263.125	94.1	pos	[M+H]+	9.11102	99114	YMUOZXZDDBRJEP-UHFFFAOYSA-N	CC1C2C(CC(=C3C(C2OC1=O)C(=CC3=O)C)C)O	0.6				245.1161 381870.1738|263.1269 329945.1113|139.0757 279138.1055|91.0547 256402.3774|93.0704 234033.9922	1.59004e+06
4.80_291.1348m/z	Phenyl-butyryl-glutamine	C15H20N2O4	4.80052	291.135	291.134	93.86	neg	[M-H]-	1.51561	9943917	XKQKXKRCMAJADR-UHFFFAOYSA-N	C1=CC=C(C=C1)CCCC(=O)NC(CCC(=O)N)C(=O)O	0.6	Organic acids and derivatives	Carboxylic acids and derivatives	Amino acids, peptides, and analogues	119.0501 48550661.2500|291.1349 17182764.2500|171.0775 8199518.5313|145.0294 5918161.6875|127.0876 5344205.9219	3.27985e+06
5.70_337.0931m/z	3-O-Coumaroylquinic acid	C16H18O8	5.70443	337.093	337.093	72.2	neg	M-H	0.620793	9945785	BMRSEYFENKXDIS-QHAYPTCMSA-N	C1C(C(C(CC1(C(=O)O)O)OC(=O)C=CC2=CC=C(C=C2)O)O)O	-0.1	Organic oxygen compounds	Organooxygen compounds	Alcohols and polyols	191.0560 11543278.0625|85.0295 634311.2500|337.0872 485077.6563|93.0344 470633.9375|111.0087 418695.9375	759998
13.14_459.3124m/z	Diosgenin	C27H42O3	13.1373	459.312	459.312	62.5	neg	M+HCOO	1.84911	99474	WQLVFSAGQJTQCK-VKROHFNGSA-N	CC1CCC2(C(C3C(O2)CC4C3(CCC5C4CC=C6C5(CCC(C6)O)C)C)C)OC1	5.7	Lipids and lipid-like molecules	Prenol lipids	Triterpenoids	459.3121 440601.9063|109.0659 304488.8389|415.3219 217428.7500|343.3008 169270.3594|371.3323 67290.4424	127096
6.65_123.0451m/z	4-Methylcatechol	C7H8O2	6.64635	123.045	123.045	75.9	neg	M-H	-0.370814	9958	ZBCATMYQYDCTIZ-UHFFFAOYSA-N	CC1=CC(=C(C=C1)O)O	1.4	Benzenoids	Phenols	Benzenediols	123.0449 4139530.0938|122.0387 333630.4688|94.0297 239539.7813|108.0216 160684.8652|95.0137 158086.7969	116879
4.56_341.0886m/z	Skimmin	C15H16O8	4.55693	341.089	341.087	50.4	neg	M-H+H2O	4.39239	99693	VPAOSFFTKWUGAD-TVKJYDDYSA-N	C1=CC(=CC2=C1C=CC(=O)O2)OC3C(C(C(C(O3)CO)O)O)O	-0.7	Phenylpropanoids and polyketides	Coumarins and derivatives	Coumarin glycosides	135.0451 1830793.9063|179.0314 1479624.9766|61.9883 308473.7500|59.0138 291809.6250|341.0982 265076.1875	715594
12.12_358.2030m/z	Pipernonaline	C21H27NO3	12.1177	358.203	358.202	35.8	neg	M-H+H2O	3.40801	9974595	PKLGRWSJBLGIBF-JMQWPVDRSA-N	C1CCN(CC1)C(=O)C=CCCCCC=CC2=CC3=C(C=C2)OCO3	4.8	Organoheterocyclic compounds	Benzodioxoles		358.2019 1600003.1250|328.1920 1280700.9688|197.0456 367748.3711|135.0453 316147.3770|161.0240 312337.0938	760341
6.69_345.1334m/z	4-Hydroxy-2',3,4',6'-tetramethoxychalcone	C19H20O6	6.68545	345.133	345.137	92.78	pos	[M+H]+	-9.55495	9974764	BAHHZVVNFAOLAZ-SOFGYWHQSA-N		3.2				327.0977 2067738.6250|131.0493 1858002.3516|163.0391 1617326.7031|309.0873 1028002.7734|345.1003 871527.0625	263152
5.31_397.1875m/z	Tirotundin	C19H28O6	5.31497	397.187	397.187	59.7	neg	M+HCOO	1.91246	9975297	VKWNXJLVNFOOOS-QNIDSSLUSA-N	CC1CC2C(C(CC3(CCC1(O3)O)C)OC(=O)C(C)C)C(=C)C(=O)O2	2.8	Lipids and lipid-like molecules	Prenol lipids	Terpene lactones	397.1879 2050633.7500|335.1862 1110284.1406|257.1546 312953.3887|379.1767 311813.5625|94.0298 295345.9688	252870
1.43_375.0729m/z	Przewalskinic acid A	C18H14O8	1.42547	375.073	375.072	52.9	neg	M-H+H2O	3.59479	9975641	GJHXGOBGPWPCCK-DBLORFJXSA-N	C1=CC(=C(C=C1C2C(C3=C(C=CC(=C3O2)O)C=CC(=O)O)C(=O)O)O)O	1.6	Phenylpropanoids and polyketides	2-arylbenzofuran flavonoids		109.0295 594413.7578|179.0344 566231.5820|137.0244 549425.9492|149.0611 362377.6055|269.0817 357363.7852	223455
4.85_403.1735m/z	Rishirilide B	C21H24O6	4.85163	403.174	403.176	64.8	neg	M-H+CH3OH	-5.85067	9976530	QUASHMJEJFFXLB-QDEDPJFRSA-N	CC1C(=O)C2=C(C=C3C(=C2)C=CC=C3O)C(C1(C(=O)O)O)(CCC(C)C)O	3.2	Benzenoids	Anthracenes	Anthracenecarboxylic acids and derivatives	241.1188 834941.3125|197.1293 538578.7031|313.1397 517684.8125|61.9882 478227.3750|130.0872 293477.6270	208011
9.28_503.3377m/z	16-Oxoalisol A	C30H48O6	9.2847	503.338	503.338	47.3	neg	M-H	-0.163633	9983614	CUDQRGCYJUHPER-KXVAGGRESA-N	CC(CC(C(C(C)(C)O)O)O)C1=C2CC(C3C4(CCC(=O)C(C4CCC3(C2(CC1=O)C)C)(C)C)C)O	2.9	Lipids and lipid-like molecules	Prenol lipids	Triterpenoids	503.3369 1796229.2813|375.3042 90883.6504|391.3015 79075.0283|459.3159 65145.7148|61.9882 62478.9258	653380
0.89_199.0379m/z	(Z)-Raphanusanin	C6H9NS2	0.894083	199.038	199.036	47.2	neg	M-H+CH3CN	9.62235	9989511	BVYUPEKENRMVJK-SNAWJCMRSA-N	CSC=C1CCNC1=S	0.9	Organoheterocyclic compounds	Thiolactams		128.0351 8766639.0000|78.9591 2985914.0000|125.0008 2628664.9883|199.0374 1824104.5000|152.9958 354422.5313	527374
7.42_285.0755m/z	Flavone base + 2O, 1MeO	C16H12O5	7.42302	285.075	285.076	97.09	pos	[M+H]+	-0.769245								285.0752 8300780.6250|270.0521 7915486.9375|147.0441 603617.6953|93.0703 357026.3770|121.0651 303440.7148	148754
[truncated: 30 more rows]
